# Supplementary material for: High-throughput transcriptomics reveals uniquely affected pathways: AgNPs, PVP-coated AgNPs and Ag NM300K case studies
Source: Royal Society of Chemistry journal article supplement (doi:10.1039/c6en00652c), 2017-01-01
Supplement: c6en00652c1.xlsx [file c6en00652c1.xlsx]

## Sheet: Table S1
Table S1: Summary information of the characteristics of the tested materials in terms of supplier, state, solubility, coating, nominal size (according to the supplier), size measured via TEM or SEM (Transmission or Scanning Electron Microscopy) measurements, purity and morphology. PVP: polyvinylpyrrolidone, w/w: wet weight.
	AgNO3	NC-AgNPs	PVP-AgNPs	Ag NM300K	Dispersant (Tween 20)
Supplier	Sigma Aldrich	AG-M-03M-NP.020N (American Elements)	AG-M-03M-NPCP.020N (American Elements)	JRC repository
State	powder	powder	powder	Suspension	Suspension
Solubility	Water soluble	Not dispersed	Not dispersed	Dispersible	Soluble
Coating	-	-	0.2%w/w PVP	-	-
nominal size (nm)	-	20-30	20-30	15	-
TEM/SEM (nm)	-	26±4	25±5	17±8	-
Purity	> 99%	0.99	0.99	10.2% w/w Ag	-
Morphology		Spherical*	Spherical*	Spherical	-
* Agglomerates observed

## Sheet: Table S2
Table S2: Primer sequences used for the qPCR confirmations
annotation	sequence ID	5'-3' Forward primer	5'-3' reverse primer
zgc:174506 protein (House keeping)	contig17334	TCGTCATCATCATCATCC	TGCTTACCTACACTTCATTCG
sarcoplasmic calcium-binding	contig14887	TACTGATAAGGCGAGGATTC	GTTTGGACGGAGATAAGGAC
wd-repeat protein	contig08546	GAGGCAAGTGGAGAGAAC	CGGAGAGAACGAGATGGT
fibrinolytic enzyme	GYUW2K402F73VR	CCTTTTCCCTTGACTTGAC	ACTGTGCGTGCTGTATGC
caspase apoptosis-related cysteine peptidase	contig01905	ATGAAGTGGATGAAGGAGC	CTGTAGGCGTAGAAGAAGTC
monoamine oxidase a	GYUW2K401D3B4G	TATCGGCACTGTTCTTCC	GCTGTTCCATCATTCTCTC
ring finger and chy zinc finger domain containing 1	contig11338	GACTGATTTCCAAGATTTCG	CACCACAACACTGAGCAC
heat shock protein gp96	GYUW2K401BB6NO	TGGCAGGGTTCATTTCTC	AAGTTCTGTCTGTAGTCGTG
glutathione-s-transferase kappa 1	contig18551	CGTGGCTTGTATGTCCTC	TCCTATGATGGTGGCTGC

## Sheet: Table S3
Table S3: List of genes confirmed by qPCR in each test condition. EC20,50: reproduction effective concentrations of 20% and 50%; AgNO3: silver nitrate; PVP-AgNPs: PVP-coated silver nanoparticles; NC-AgNPs: Non-coated silver nanomarticles; Ag NM300K: dispersed silver nanomaterial; d: days; x: confirmation performed by qPCR
gene		test condition
annotation	sequence ID	AgNO3.EC20.3d	AgNO3.EC50.3d	PVP-AgNPs.EC20.3d	PVP-AgNPs.EC50.3d	NC-AgNPs.EC20.3d	NC-AgNPs.EC50.3d	Ag NM300K. EC50.3d	AgNO3.EC20.7d	AgNO3.EC50.7d	PVP-AgNPs.EC20.7d	PVP-AgNPs.EC50.7d	NC-AgNPs.EC20.7d	NC-AgNPs.EC50.7d
sarcoplasmic calcium-binding	contig14887		x		x		x
wd-repeat protein	contig08546	x		x		x
fibrinolytic enzyme	GYUW2K402F73VR			x
caspase apoptosis-related cysteine peptidase	contig01905				x		x	x
monoamine oxidase a	GYUW2K401D3B4G			x	x	x	x
ring finger and chy ziAg-NPs Non-coated finger domain containing 1	contig11338								x	x	x	x	x	x
heat shock protein gp96	GYUW2K401BB6NO				x		x
glutathione-s-transferase kappa 1	contig18551			x		x

## Sheet: Table S4
Table S4: List of all the differentially expressed genes in at least one condition (BH adjusted, p<0.05) with the M value (log2 fold change) and adjusted p value for each treatment, and the GO annotation for each gene. EC20,50: reproduction effective concentrations of 20% and 50%; AgNO3: silver nitrate; PVP-AgNPs: PVP-coated silver nanoparticles; NC-AgNPs: Non-coated silver nanomarticles; Ag NM30…
		AgNO3.EC20.3d		AgNO3.EC20.7d		AgNO3.EC50.3d		AgNO3.EC50.7d		PVP-AgNPs.EC20.3d		PVP-AgNPs.EC20.7d		PVP-AgNPs.EC50.3d		PVP-AgNPs.EC50.7d		NC-AgNPs.EC20.3d		NC-AgNPs.EC20.7d		NC-AgNPs.EC50.3d		NC-AgNPs.EC50.7d		Ag NM300K.EC20.3d		Ag NM300K.EC20.7d		Ag NM300K.EC50.3d		Ag NM300K.EC50.7d
annotation	sequence ID	M value	adjusted p value	M value	adjusted p value	M value	adjusted p value	M value	adjusted p value	M value	adjusted p value	M value	adjusted p value	M value	adjusted p value	M value	adjusted p value	M value	adjusted p value	M value	adjusted p value	M value	adjusted p value	M value	adjusted p value	M value	adjusted p value	M value	adjusted p value	M value	adjusted p value	M value	adjusted p value
	contig00011	0.13322	0.77314	0.19821	0.78599	0.40733	0.19266	0.032539	0.99997	0.13661	0.75975	0.054891	0.9426	0.61082	0.011131	0.2162	0.64222	0.14555	0.76645	0.24223	0.71059	0.58511	0.015034	0.099395	0.92169	0.061788	0.96366	-0.055058	0.99936	0.35794	0.544	0.32277	0.45246
	contig00012	0.562	0.23748	-0.044583	0.97753	0.79512	0.071786	-0.063285	0.99997	0.32864	0.5552	-0.23018	0.78594	0.88503	0.011502	-0.22899	0.77046	0.25548	0.70253	-0.54083	0.47326	1.0817	0.0025612	-0.28439	0.78762	-0.19845	0.88888	0.098103	0.99936	-0.12363	0.96585	0.27117	0.73559
	contig00015	0.60765	0.064154	0.46217	0.4757	0.59826	0.067167	0.34009	0.90626	0.5094	0.11375	-0.017687	0.9841	0.91397	0.00064417	0.26877	0.56939	0.41449	0.2603	0.16375	0.85645	1.0781	0.00017166	0.041096	0.97739	0.29135	0.68409	-0.095634	0.99936	0.40736	0.4973	0.31218	0.52398
	contig00020	0.28716	0.51334	0.20303	0.81782	0.60961	0.086642	-0.061654	0.99997	0.35557	0.37226	-0.061484	0.94398	0.51024	0.07234	-0.048951	0.95256	0.0048519	0.99501	0.10037	0.93841	0.61792	0.027685	0.095528	0.94292	0.01839	0.99205	0.028772	0.99936	0.14303	0.94375	0.36736	0.47069
endonuclease-reverse transcriptase	contig00030	0.37546	0.11451	0.15528	0.77995	0.42339	0.06906	0.00016498	0.99997	0.35849	0.1203	-0.0066078	0.99214	0.55749	0.0028822	0.1177	0.77811	0.11974	0.74384	0.059225	0.94428	0.56934	0.0026065	0.15962	0.76472	-0.1208	0.86334	0.086579	0.99936	-0.0055769	0.99882	0.33736	0.25119
endonuclease-reverse transcriptase	contig00032	0.28093	0.5515	0.74568	0.22615	0.26181	0.55869	0.26489	0.99997	0.5789	0.11328	0.13504	0.86547	0.88196	0.003015	0.48016	0.2812	0.56323	0.14962	0.35746	0.61474	0.84114	0.0047225	0.22685	0.80399	0.48725	0.41717	-0.089221	0.99936	0.32601	0.74748	0.12166	0.88032
uncharacterized protein	contig00033	0.48396	0.094173	0.394	0.48946	0.47993	0.092773	0.03916	0.99997	0.49427	0.070718	0.10358	0.86547	0.70827	0.001974	0.14524	0.7747	0.092218	0.85487	0.11053	0.90109	0.79668	0.00077175	0.032919	0.97959	-0.091188	0.93249	-0.0083375	0.99936	-0.10523	0.94864	0.3001	0.45751
	contig00041	0.20727	0.54605	0.38061	0.48285	0.39926	0.14707	0.16331	0.99997	0.28411	0.34152	0.12761	0.81143	0.65684	0.0025242	0.3635	0.25798	0.13016	0.76557	0.24212	0.66104	0.65053	0.00297	0.22945	0.67533	-0.0096114	0.99466	0.10148	0.99936	-0.050252	0.97864	0.47437	0.14359
	contig00043	0.81673	0.038297	1.1267	0.045499	0.75551	0.055525	0.39972	0.91154	0.89124	0.015744	0.44124	0.44656	1.3554	6.7142e-05	0.5503	0.23261	1.0417	0.0076991	0.30291	0.72487	1.1354	0.00059357	0.50638	0.42612	-0.14784	0.91625	-0.068767	0.99936	-0.065778	0.9807	0.087232	0.92827
early gene at 23 cg3327- partial	contig00046	0.035901	0.96142	0.10898	0.91735	0.00034186	0.99939	0.57426	0.57353	-0.069589	0.91145	0.14676	0.84753	0.10748	0.76158	0.12939	0.86386	-0.34362	0.45987	-0.067857	0.96269	0.20157	0.53611	0.0056052	0.9974	-0.25132	0.79016	0.23442	0.96363	-0.44218	0.51647	0.85621	0.039538
lactase-phlorizin hydrolase	contig00049	0.97851	0.055242	-0.29301	0.81636	0.9628	0.058824	-0.03608	0.99997	1.1987	0.011846	-0.26877	0.78204	1.3926	0.00078711	-0.35462	0.6517	0.82242	0.11811	-0.15192	0.93159	1.1751	0.0040384	-0.24986	0.8591	0.18156	0.92191	-0.33846	0.95866	-0.41624	0.78738	0.022102	0.98838
pentatricopeptide repeat domain 3	contig00050	0.3011	0.32789	0.23628	0.70131	0.29522	0.32114	0.12991	0.99997	0.15377	0.68427	0.31737	0.42355	0.31279	0.16254	0.57503	0.045981	-0.09162	0.84946	0.20454	0.73828	0.43503	0.04553	0.44628	0.24921	-0.37947	0.37862	0.31306	0.71364	-0.43417	0.29436	0.70342	0.023477
	contig00053	0.15039	0.89035	0.34244	0.82368	0.35969	0.63985	0.17494	0.99997	0.60697	0.37872	0.26057	0.83247	1.1172	0.020918	0.67423	0.39048	0.49448	0.55087	0.49828	0.70121	0.99511	0.039933	0.2994	0.86028	-0.11345	0.96723	0.62884	0.78786	-0.12791	0.97586	0.80734	0.31024
hypothetical protein BRAFLDRAFT_72696 [Branchiostoma floridae]	contig00078	0.42558	0.31125	0.30819	0.71904	0.80059	0.035418	0.33835	0.95851	0.51916	0.17616	0.42118	0.44893	0.70021	0.019092	0.29705	0.59033	-0.054272	0.94209	0.11941	0.92707	0.67352	0.024124	0.43346	0.49988	-0.59599	0.2743	0.074152	0.99936	-0.73812	0.14244	0.44573	0.38715
	contig00086	0.44905	0.16134	0.23569	0.73942	0.69943	0.025509	-0.031454	0.99997	0.51891	0.08258	-0.059017	0.93862	0.78337	0.0016385	0.003156	0.99788	0.30254	0.43391	-0.12362	0.89637	0.78332	0.0018637	0.036181	0.97923	-0.26266	0.70321	-0.1116	0.99936	-0.31227	0.65627	0.19093	0.73327
	contig00095	0.4769	0.2153	0.3858	0.61122	0.80041	0.028793	0.26717	0.99779	0.44641	0.24065	0.38419	0.47939	0.76829	0.007502	0.32684	0.51504	-0.043362	0.95412	0.25157	0.76678	0.78131	0.0068181	0.383	0.54785	-0.44706	0.46488	0.20948	0.97852	-0.74802	0.11342	0.37768	0.46569
	contig00106	0.2031	0.61524	0.37858	0.54073	0.34889	0.28418	0.15424	0.99997	0.097168	0.8406	0.27054	0.57983	0.54862	0.023016	0.46325	0.1819	-0.03335	0.9586	0.16883	0.83351	0.59735	0.013386	0.26327	0.66447	-0.21679	0.77941	0.21344	0.95001	-0.35371	0.5579	0.56995	0.11251
	contig00110	0.28202	0.34789	0.46773	0.32188	0.35113	0.19928	-0.018694	0.99997	0.20982	0.52039	0.18658	0.68663	0.66791	0.0017759	0.24108	0.51182	0.19486	0.60001	0.16225	0.80437	0.7397	0.00080575	0.089856	0.91724	-0.0151	0.99171	-0.10775	0.99936	0.060783	0.97192	0.11115	0.83751
	contig00111	-0.10849	0.79715	0.4009	0.45321	0.090194	0.81341	-0.083976	0.99997	0.11251	0.78124	0.092312	0.87659	0.56457	0.0083926	0.19105	0.64492	0.10458	0.8183	0.39956	0.34587	0.56977	0.008065	0.085529	0.92679	0.077972	0.9397	0.040426	0.99936	-0.05038	0.9785	0.12534	0.81546
protein	contig00118	0.21973	0.52894	0.12194	0.86935	0.41321	0.14398	-0.03602	0.99997	0.2349	0.48266	0.21189	0.65364	0.57091	0.0097767	0.081836	0.89375	0.05102	0.92443	-0.049996	0.96383	0.59457	0.0074323	0.044174	0.97081	-0.25508	0.66988	-0.04752	0.99936	-0.38078	0.42138	0.1098	0.84913
protein	contig00132	-0.030507	0.95672	0.27952	0.62984	0.26331	0.39736	-0.19023	0.99997	0.24053	0.4659	-0.22266	0.62731	0.54571	0.012935	-0.15406	0.74818	-0.037174	0.94627	-0.23211	0.68843	0.54437	0.013247	-0.1898	0.76448	-0.38256	0.38167	-0.21843	0.92215	-0.28801	0.64336	0.085893	0.88967
	contig00135	0.11183	0.82284	0.016593	0.98728	0.40625	0.20594	-0.011838	0.99997	0.53524	0.073137	-0.12724	0.84325	0.67503	0.0061627	0.12553	0.83583	0.15921	0.74345	-0.00019478	0.99966	0.61994	0.011771	-0.11499	0.90529	-0.23587	0.75152	-0.055732	0.99936	-0.23546	0.82081	0.28849	0.53978
protein	contig00139	0.66186	0.085167	0.24353	0.79081	0.56766	0.14028	0.41556	0.87716	0.69594	0.055569	0.099837	0.91043	1.0275	0.00090218	0.44324	0.35392	0.66779	0.084959	-0.0019741	0.99858	0.7951	0.0085216	0.077271	0.95939	0.11306	0.93751	0.070472	0.99936	-0.24896	0.86053	0.36827	0.51516
	contig00145	0.494	0.11301	0.13773	0.86509	0.37413	0.24484	-0.064258	0.99997	0.6587	0.022124	0.010654	0.99015	0.90576	0.00034737	0.18553	0.71413	0.26201	0.51892	-0.030962	0.97934	0.89773	0.00049901	-0.024101	0.98566	-0.046736	0.97497	0.0078378	0.99936	-0.23128	0.82188	0.28755	0.53366
	contig00152	0.1019	0.82692	0.041262	0.96725	0.22675	0.50295	-0.018838	0.99997	0.23997	0.48831	0.42919	0.26029	0.51316	0.02404	0.3447	0.33298	0.10406	0.83356	0.14912	0.84973	0.54508	0.016545	0.39679	0.37317	-0.0017454	0.99854	0.11155	0.99936	0.06994	0.97049	0.48922	0.15884
	contig00161	0.080277	0.92687	0.3955	0.70266	0.34044	0.53542	0.37892	0.98796	0.21085	0.75397	0.25723	0.76744	0.08174	0.86152	0.45175	0.46767	-0.28527	0.67343	-0.2056	0.87625	0.88222	0.015543	0.22178	0.86345	-0.2752	0.83621	-0.029471	0.99936	-0.26171	0.8986	0.22649	0.80035
orf2-encoded protein	contig00164	0.13697	0.77413	0.37678	0.56	0.49489	0.11689	0.35487	0.86169	0.44338	0.16211	0.30455	0.52929	0.54153	0.029303	0.34496	0.39181	0.20165	0.65843	0.63256	0.14143	0.4351	0.08279	0.45244	0.33517	0.12385	0.91005	-0.0282	0.99936	0.10116	0.95792	0.30952	0.50369
hypothetical protein DAPPUDRAFT_104992 [Daphnia pulex]	contig00173	0.39253	0.27661	0.21118	0.79053	0.36674	0.30213	0.18362	0.99997	0.20673	0.6383	0.2048	0.73387	0.60627	0.019975	0.38271	0.35493	0.22794	0.62628	0.30147	0.64867	0.67152	0.010233	0.31622	0.60831	-0.52544	0.26568	0.22934	0.95049	-0.17779	0.90826	0.47715	0.24925
	contig00177	0.32135	0.63669	0.26103	0.8406	0.61491	0.24867	0.47669	0.9372	0.55222	0.31409	0.62554	0.37832	0.751	0.06324	0.37701	0.61789	0.57759	0.32875	0.63524	0.45428	0.92931	0.020228	0.75378	0.31234	-0.48043	0.64517	0.32641	0.96363	-0.26817	0.91118	0.4672	0.545
	contig00196	2.7615	0.29688	1.485	0.79682	1.9428	0.48812	1.6796	0.99997	5.2176	0.020499	1.7758	0.66486	7.4815	0.00019362	1.7333	0.63231	4.716	0.048211	1.6304	0.77499	5.2207	0.0062933	1.7052	0.75015	3.9193	0.24691	-0.51557	0.99936	4.2744	0.2049	-0.041038	0.99539
	contig00198	-0.13091	0.81296	0.22544	0.78805	0.46349	0.1962	-0.1677	0.99997	0.28633	0.49751	-0.17874	0.7889	0.62114	0.02416	-0.19493	0.74533	0.16815	0.76346	-0.11675	0.91931	0.60945	0.026904	-0.16409	0.8661	0.21847	0.82284	-0.068487	0.99936	0.40907	0.54552	0.053978	0.95364
glycomidase [Candida albicans]	contig00202	-2.6449	0.016129	-1.0991	0.6398	-0.022784	0.99052	0.021411	0.99997	-0.039312	0.98594	0.28916	0.91106	0.43529	0.67617	-0.58309	0.76585	0.37888	0.84518	0.31007	0.93841	0.89798	0.33885	-0.053919	0.99185	1.057	0.64237	0.89624	0.91312	1.2458	0.58331	1.2766	0.40135
	contig00217	-0.088274	0.91437	0.10057	0.93967	0.81127	0.06561	0.56638	0.77932	0.62252	0.16298	0.31788	0.67625	0.57938	0.10268	0.041644	0.96711	0.51584	0.3117	0.34501	0.71755	0.86636	0.013142	0.55103	0.4412	0.0016591	0.99904	0.38005	0.88692	0.2622	0.89013	0.57993	0.313
	contig00228	0.72816	0.10757	0.73709	0.37124	0.24798	0.6604	0.016429	0.99997	0.88334	0.035463	-0.093649	0.9297	1.1122	0.0018919	0.046913	0.96334	0.77161	0.089793	0.020967	0.98942	1.0667	0.0029723	-0.11878	0.94329	0.1823	0.90495	-0.044882	0.99936	-0.055625	0.98751	0.057296	0.96396
	contig00229	0.63536	0.24693	0.25265	0.84647	0.36005	0.55632	0.44195	0.97019	0.65843	0.21065	0.2519	0.79866	0.82593	0.040719	0.28964	0.73831	0.74466	0.16969	0.63331	0.45966	1.038	0.010099	0.54502	0.53952	-0.39812	0.74139	0.084252	0.99936	-0.5017	0.67603	0.45888	0.55712
	contig00236	0.15706	0.63311	0.31824	0.51923	0.44579	0.06853	0.22063	0.95619	0.2508	0.35708	0.24219	0.51908	0.74174	0.00027626	0.43973	0.098166	0.12964	0.73343	0.19788	0.70549	0.59907	0.0025611	0.30447	0.44463	0.16653	0.79633	0.19047	0.92612	0.084845	0.95444	0.31435	0.33016
	contig00265	0.83103	0.064154	0.24417	0.8282	0.8204	0.066345	0.034415	0.99997	1.1342	0.0068251	0.17162	0.85795	1.3112	0.00038606	0.22006	0.78647	0.70409	0.13168	0.12167	0.93969	1.2396	0.00085424	0.26482	0.8127	-0.12621	0.94122	0.13681	0.99936	0.46947	0.63427	0.47288	0.45513
	contig00273	0.030401	0.96923	0.0043424	0.99661	0.023367	0.97274	-0.30576	0.99431	0.25983	0.60599	-0.43332	0.44449	0.71645	0.018953	-0.5254	0.24912	0.13366	0.84256	-0.32398	0.68648	0.33813	0.29579	-0.46831	0.46339	0.21273	0.8512	-0.6352	0.40151	0.47636	0.50197	-0.35335	0.54908
	contig00276	0.32692	0.47289	0.038929	0.9773	0.49079	0.21091	0.00026632	0.99997	0.49178	0.20898	0.087344	0.92201	0.85377	0.0045899	0.18814	0.78279	0.4624	0.28307	-0.010616	0.99326	0.63185	0.034797	0.30585	0.69498	0.61485	0.25101	-0.15922	0.99936	0.6518	0.22629	0.32974	0.57759
	contig00277	0.22301	0.66358	0.12027	0.90808	0.26071	0.56408	-0.28627	0.99758	0.21314	0.67896	-0.59667	0.22119	0.090442	0.80654	-0.82184	0.035733	-0.38577	0.40093	-0.74789	0.14277	0.05261	0.88976	-0.71502	0.148	-0.81427	0.084254	-0.34317	0.85927	-1.026	0.016959	-0.50223	0.29996
	contig00280	0.52259	0.32189	-0.69066	0.46049	-0.063658	0.9343	-0.52331	0.87514	-0.099081	0.90114	-0.79042	0.19462	0.53246	0.16744	-0.67927	0.21178	0.17341	0.83021	-0.55554	0.49687	0.80918	0.030116	-0.367	0.71353	-0.47521	0.60467	0.060904	0.99936	-0.10546	0.97192	0.087902	0.94205
	contig00281	0.8437	0.073683	-0.41502	0.68985	0.55038	0.26849	-0.55413	0.84031	0.28841	0.64679	-0.64871	0.30886	0.9356	0.011612	-1.0978	0.024199	0.35594	0.58373	-0.4712	0.59522	1.0899	0.0038433	-0.67157	0.3395	-0.7948	0.22354	0.012124	0.99936	-0.49575	0.63029	0.40716	0.57972
reverse transcriptase- partial	contig00286	0.10279	0.78782	0.19255	0.73497	0.26385	0.3283	0.1	0.99997	0.38008	0.12067	0.24828	0.51045	0.36932	0.061937	0.060525	0.91269	0.22876	0.4724	0.039497	0.96785	0.51474	0.0089505	0.24789	0.58471	-0.073281	0.93781	-0.0018267	0.99997	-0.10052	0.94375	0.24825	0.49437
	contig00290	0.54407	0.44104	0.17265	0.90664	0.81474	0.18259	-0.13033	0.99997	0.57262	0.3998	0.10257	0.93862	1.0335	0.028676	-0.37569	0.64625	0.48367	0.54853	-0.43774	0.69768	0.88795	0.061275	0.13371	0.94698	-0.13264	0.95044	0.20681	0.99936	-0.069333	0.9861	0.48453	0.5538
endonuclease-reverse transcriptase	contig00291	-0.0050993	0.99459	0.12192	0.88891	0.22957	0.54714	0.16241	0.99997	0.22219	0.58669	0.40666	0.35574	0.42135	0.099236	0.00042137	0.99965	0.26359	0.53739	0.19014	0.81105	0.64012	0.011141	0.23714	0.73179	0.16764	0.8597	-0.1687	0.98857	0.14578	0.93171	0.12143	0.8564
endonuclease-reverse transcriptase	contig00301	0.22153	0.57446	0.2515	0.71723	0.3501	0.28337	-0.10911	0.99997	0.2264	0.55597	0.031726	0.96854	0.61463	0.011036	0.11846	0.8451	0.19556	0.65985	0.057245	0.96264	0.73118	0.003025	0.12792	0.88681	-0.087771	0.93973	0.050126	0.99936	-0.062002	0.97659	0.22116	0.67182
	contig00303	0.36031	0.35301	0.42939	0.53496	0.67171	0.050271	0.12995	0.99997	0.3972	0.27367	0.15265	0.82197	0.68047	0.011748	0.27883	0.5725	0.2845	0.53417	-0.01518	0.98969	0.85903	0.0020148	0.21919	0.78782	0.093256	0.9431	0.079137	0.99936	-0.0025844	0.99945	0.33781	0.50179
	contig00309	0.61675	0.27208	0.11493	0.94124	0.55787	0.31546	0.017732	0.99997	0.46579	0.43708	-0.065098	0.9607	0.95314	0.018952	-0.74015	0.21149	0.39108	0.58195	0.086752	0.9653	0.9976	0.014137	-0.0065763	0.99819	-0.2006	0.9102	0.34327	0.95766	-0.16018	0.96049	0.47917	0.53775
	contig00331	0.81805	0.06028	0.71764	0.37154	1.1063	0.013985	0.7046	0.52388	0.7351	0.07964	0.6285	0.27828	1.0758	0.0020249	0.64439	0.19356	0.64078	0.16535	0.63274	0.35449	1.0535	0.0026688	1.1632	0.024612	0.09379	0.96006	0.71055	0.40325	-0.14121	0.95792	0.80408	0.11523
	contig00337	1.1225	0.068747	0.25335	0.87775	1.0802	0.11713	-0.31388	0.99997	0.64773	0.33565	-0.29321	0.80714	1.0804	0.026005	-0.49459	0.5772	0.89312	0.1731	-0.32429	0.84488	0.60311	0.23501	-0.16155	0.94393	-0.50888	0.71733	-0.28125	0.99831	0.20185	0.9567	0.80778	0.31119
	contig00339	1.0779	0.016129	0.17906	0.88372	0.76157	0.092864	-0.070182	0.99997	1.16	0.0062955	-0.16811	0.8629	1.4062	0.00020063	-0.0083644	0.99455	1.0704	0.01623	0.086707	0.9615	1.6101	7.8749e-05	0.36902	0.69058	-0.21798	0.87708	0.065614	0.99936	-0.15356	0.95509	0.23961	0.78201
	contig00343	0.18262	0.79229	0.2071	0.85967	0.1233	0.84789	-0.052009	0.99997	0.77187	0.07249	-0.12915	0.89982	0.9592	0.006823	0.0048463	0.99771	0.42188	0.45777	-0.20561	0.87207	0.92709	0.0089937	-0.039116	0.98441	0.068741	0.9748	-0.33305	0.93524	0.32833	0.82918	0.035527	0.98022
	contig00345	0.071842	0.94441	0.12454	0.93589	0.46035	0.44028	0.039551	0.99997	0.8801	0.081279	-0.090237	0.94398	1.1293	0.0063659	-0.021091	0.98726	0.42873	0.542	0.067031	0.97521	1.0219	0.013295	0.037794	0.98769	-0.16588	0.9329	0.20867	0.99936	0.2884	0.90491	0.49114	0.53162
ubx domain containing 8	contig00349	0.42483	0.28592	0.35246	0.64793	0.31185	0.45431	0.52776	0.65427	0.42394	0.27023	0.33803	0.55034	0.67533	0.018258	0.63131	0.10974	0.55841	0.14117	0.44861	0.46208	0.79072	0.0061474	0.57112	0.27077	-0.17413	0.8771	0.68709	0.26544	-0.31707	0.74923	0.7557	0.068737
reverse transcriptase-like protein	contig00358	0.21302	0.61406	-0.10455	0.90511	0.25092	0.50457	-0.27084	0.97859	0.32154	0.36848	0.047524	0.95284	0.52352	0.038836	-0.14082	0.81617	0.22361	0.62065	-0.079462	0.94599	0.35308	0.17536	0.080951	0.94693	-0.24947	0.74168	-0.13555	0.99936	0.054895	0.98052	0.032611	0.97355
	contig00362	0.86769	0.13356	0.089059	0.96338	0.60027	0.32892	-0.27206	0.99997	0.82011	0.14731	-0.48967	0.59095	1.1752	0.0085848	-0.52644	0.49545	1.1393	0.041654	0.016595	0.9926	1.1947	0.007817	-0.49286	0.65746	0.96042	0.22196	-0.15557	0.99936	1.2138	0.091504	-0.23133	0.84187
tissue factor pathway inhibitor 2	contig00363	1.3655	0.0095199	0.38513	0.75237	1.3653	0.013919	-0.005218	0.99997	1.4634	0.0038225	-0.35787	0.70526	2.0777	1.5473e-05	-0.11226	0.92744	1.5204	0.0039972	-0.15107	0.93799	1.9785	5.3252e-05	-0.12381	0.95164	0.92407	0.20938	-0.15327	0.99936	1.2594	0.054201	-0.14206	0.90808
predicted protein [Pediculus humanus corporis]	contig00366	0.84518	0.26855	-0.31062	0.91063	1.5111	0.033229	0.14217	0.99997	0.39502	0.68114	-1.0386	0.48526	1.2897	0.020146	-1.3009	0.2707	0.96699	0.20476	-0.8774	0.66337	1.1305	0.069983	-0.67385	0.76482	0.77421	0.54268	-0.19068	0.99936	0.52166	0.82362	-0.45136	0.718
	contig00367	0.69693	0.12984	0.75986	0.35242	0.67791	0.13559	0.53813	0.83347	0.55626	0.23757	0.25383	0.7647	1.0549	0.0033145	0.7842	0.10967	0.78344	0.087903	0.38476	0.6779	1.0797	0.0029376	0.49911	0.51458	0.19366	0.8962	0.28358	0.96604	0.056436	0.98743	0.1805	0.84543
	contig00374	2.032	0.016013	0.36012	0.87403	1.1384	0.19358	0.27198	0.99997	0.86181	0.36446	0.25909	0.89268	1.4417	0.032407	0.11037	0.955	0.91639	0.36883	0.14729	0.96419	1.1303	0.097534	0.29375	0.91481	0.082634	0.98444	-0.26514	0.99936	0.12418	0.98401	-0.28264	0.87893
	contig00409	-0.040775	0.95253	0.41612	0.55129	0.47427	0.17296	0.061608	0.99997	0.2257	0.61265	-0.056768	0.94672	0.7089	0.0085791	0.22597	0.67606	0.067226	0.91819	0.1263	0.90785	0.63589	0.01823	0.15852	0.86722	0.054019	0.97346	0.28822	0.89474	0.076269	0.97192	0.42827	0.34325
	contig00417	0.13759	0.78018	0.044225	0.96949	0.50646	0.1187	-0.02241	0.99997	0.36813	0.28526	-0.060497	0.94008	0.66447	0.0093054	-0.0038053	0.99727	0.071888	0.90717	0.026003	0.98441	0.5716	0.025038	0.095296	0.93428	-0.16614	0.86449	0.066117	0.99936	0.0073434	0.99882	0.45417	0.26732
anopheles gambiae pest agap012902-pa	contig00419	-0.20377	0.54841	0.061142	0.93962	0.18743	0.56193	-0.47201	0.41841	0.32606	0.24711	-0.27683	0.49302	0.66624	0.0019832	-0.11129	0.83009	0.1561	0.69822	-0.31905	0.49264	0.62973	0.0034877	-0.21523	0.69751	-0.080552	0.93642	-0.29425	0.74218	-0.12477	0.92926	-0.13908	0.78762
kiaa0727 protein isoform 2	contig00420	0.18629	0.68996	0.34064	0.62498	0.2907	0.44727	-0.11529	0.99997	0.14468	0.76938	0.15827	0.80944	0.67349	0.01064	0.30571	0.50495	0.19816	0.68991	0.0065445	0.99619	0.70524	0.0077991	0.10212	0.93038	-0.043454	0.97971	-0.09702	0.99936	0.10917	0.95781	0.11093	0.87847
egf-like domain-containing protein	contig00442	0.28047	0.43895	0.28042	0.67576	0.25407	0.4747	0.095295	0.99997	0.2697	0.45575	0.12186	0.84948	0.64469	0.0078798	0.40027	0.27362	0.50939	0.10569	0.39692	0.43066	0.59817	0.013577	0.21526	0.75469	0.15206	0.87296	0.0063922	0.99988	0.14587	0.92835	0.29533	0.51659
signal cub egf-like 1	contig00446	1.045	0.023119	0.36694	0.72848	1.1018	0.020261	-0.0032977	0.99997	1.2691	0.0038545	0.14608	0.88903	1.7292	2.5225e-05	0.49146	0.41289	1.7037	0.00024937	0.38157	0.69543	1.5051	0.0001925	0.39003	0.67574	0.85059	0.17024	0.095257	0.99936	0.66878	0.37467	0.21474	0.81517
prostaglandin d2 hematopoietic-like	contig00453	0.64368	0.075457	0.79285	0.17024	0.42433	0.26538	0.34297	0.93179	0.36823	0.35639	-0.13717	0.85881	0.60316	0.034334	-0.35435	0.46445	0.22573	0.66725	-0.06707	0.96264	0.36766	0.21521	-0.0076146	0.99676	-0.19195	0.85659	-0.52117	0.52131	-0.018931	0.99528	-0.48347	0.29881
prostaglandin d2 hematopoietic-like	contig00460	0.80886	0.084814	0.050624	0.97558	0.41551	0.43237	-0.049475	0.99997	0.38248	0.49637	-0.55442	0.39947	0.64117	0.084851	-0.64161	0.23877	0.34803	0.58983	-0.26069	0.83027	1.326	0.00064117	-0.21907	0.8661	-0.52775	0.52289	-0.17041	0.99936	-0.12632	0.96644	-0.31374	0.70103
aquaporin 3	contig00464	0.27786	0.672	0.075959	0.96241	0.52148	0.31	0.25873	0.99997	1.0962	0.013771	0.091263	0.93862	1.225	0.0014331	-0.14265	0.88988	0.90435	0.057821	-0.001729	0.99917	1.0318	0.006497	0.44952	0.61726	0.75909	0.26537	-0.16562	0.99936	0.48404	0.65423	0.39945	0.59919
transposase-like	contig00489	0.090058	0.88103	0.29197	0.70715	0.54079	0.11852	0.11337	0.99997	0.33978	0.38174	0.26684	0.64401	0.78564	0.0042018	0.52894	0.17563	0.17729	0.74254	0.1538	0.87614	0.77205	0.0050814	0.42539	0.44811	0.13961	0.90679	0.22554	0.95964	-0.13372	0.94649	0.40128	0.39346
hypothetical protein BRAFLDRAFT_74839 [Branchiostoma floridae]	contig00506	2.0332	0.036474	-0.20445	0.95368	-0.084806	0.9579	-0.074769	0.99997	0.25684	0.87304	1.1528	0.47872	0.052725	0.96115	0.15102	0.95227	0.11004	0.96145	-0.28681	0.9422	-0.066686	0.94801	-0.043416	0.99304	-0.44425	0.88551	0.10605	0.99936	-1.1278	0.55691	0.72666	0.65688
	contig00507	0.21355	0.55059	0.25966	0.67514	0.39177	0.17385	-0.031619	0.99997	0.20711	0.56036	0.27541	0.52558	0.68303	0.0025082	0.3214	0.36759	0.16302	0.70123	0.12057	0.88584	0.53324	0.016787	0.33285	0.48071	0.026985	0.98472	0.054937	0.99936	0.10542	0.94808	0.26766	0.52661
gpi transamidase component pig-s	contig00508	0.34336	0.2086	0.24188	0.66641	0.44762	0.082655	0.073148	0.99997	0.24923	0.39512	0.10909	0.83424	0.55367	0.006811	0.26533	0.43475	0.10068	0.81649	0.018716	0.98547	0.61797	0.0029774	0.21276	0.68595	-0.21781	0.70689	0.17214	0.95766	-0.042643	0.98085	0.55522	0.059963
	contig00518	0.83362	0.21728	-0.35492	0.82411	1.7186	0.010331	0.35307	0.99997	1.3307	0.026162	0.31966	0.79517	1.2395	0.013718	-0.57612	0.51295	1.1443	0.075846	-0.47695	0.7367	0.78107	0.12761	-0.30468	0.8638	1.3026	0.17186	-0.8787	0.56118	0.74436	0.6356	-0.078058	0.96612
	contig00547	0.8342	0.022019	0.17543	0.85443	0.74754	0.042465	-0.016348	0.99997	0.93137	0.0066411	-0.042485	0.96439	0.94141	0.001452	0.001038	0.99928	0.46414	0.25999	-0.092393	0.94488	0.95129	0.001523	0.037238	0.98276	0.021281	0.99148	0.29222	0.91687	-0.07518	0.97641	0.29293	0.6229
	contig00548	0.083791	0.84601	0.27726	0.60883	0.43728	0.092331	-0.041504	0.99997	0.3045	0.26862	0.1021	0.85182	0.60709	0.0033636	0.29737	0.36342	0.2407	0.46885	0.10567	0.89312	0.57058	0.0058094	0.19201	0.73451	0.029222	0.9821	0.020708	0.99936	0.066784	0.96809	0.27417	0.45446
reverse transcriptase-like protein	contig00551	0.12563	0.68388	0.19054	0.70168	0.049641	0.8813	-0.01744	0.99997	0.15995	0.56905	0.065453	0.89718	0.4225	0.015872	0.0090052	0.98713	0.08787	0.81286	0.17638	0.71066	0.51889	0.0035932	0.088285	0.89356	0.074802	0.92598	0.10838	0.99593	-0.2463	0.59097	0.28729	0.32144
orf2-encoded protein	contig00552	0.16266	0.72461	0.3194	0.63106	0.49475	0.12304	0.22709	0.99997	0.44171	0.1707	0.18436	0.75645	0.6856	0.0066637	0.067772	0.92671	0.34971	0.35578	0.20586	0.78988	0.79775	0.0020694	0.21956	0.7617	0.07542	0.9543	0.07167	0.99936	-0.25489	0.80153	0.26027	0.61215
innexin family protein	contig00558	0.54577	0.40437	0.2426	0.87157	0.39332	0.5633	-0.17337	0.99997	1.2221	0.021018	-0.12206	0.92777	1.5481	0.00076906	-0.25715	0.8078	1.0847	0.054502	0.0086948	0.99663	1.3675	0.0027151	0.10244	0.96414	0.32919	0.8402	-0.60918	0.75109	0.10456	0.97864	-0.4024	0.67805
	contig00561	-0.73648	0.36506	-0.057057	0.98152	-0.40067	0.65614	-0.33013	0.99997	0.29943	0.77823	0.66619	0.54895	1.2183	0.030402	-0.19792	0.90032	0.53539	0.58833	0.17419	0.94713	0.95304	0.094223	-0.2311	0.92205	0.50436	0.77988	-0.0088128	0.99997	-0.6211	0.75078	-0.16407	0.92437
phosphatidylcholine-sterol acyltransferase	contig00565	0.65621	0.36801	0.28272	0.8668	0.71364	0.29758	0.28345	0.99997	0.85691	0.18781	0.45906	0.67585	1.0112	0.045812	0.6392	0.45096	1.0651	0.10345	0.51645	0.70324	1.3846	0.0063704	0.9131	0.33898	-0.03855	0.99113	0.67645	0.76252	0.41408	0.863	-0.051589	0.9795
endonuclease-reverse transcriptase	contig00569	0.28084	0.53008	0.044999	0.97181	0.16364	0.73068	-0.41873	0.84528	0.39543	0.30516	-0.30473	0.60018	0.7119	0.011765	-0.22407	0.70144	0.38584	0.36673	-0.29476	0.69587	0.54935	0.052997	-0.17098	0.86398	-0.04609	0.97971	-0.21109	0.97773	0.35786	0.66576	0.019514	0.98612
	contig00580	0.15562	0.72966	0.26896	0.69606	0.46349	0.13673	-0.021167	0.99997	0.28532	0.42374	0.071258	0.92195	0.61136	0.012155	0.27339	0.52509	0.12579	0.80643	0.30084	0.60778	0.70325	0.0044564	0.14817	0.8636	0.010835	0.99466	-0.060134	0.99936	0.14487	0.92926	0.3512	0.40756
moco sulphurase c-terminal domain containing 1	contig00603	0.75985	0.069393	0.39329	0.66244	0.45544	0.31098	0.45808	0.87516	0.87448	0.025619	-0.14775	0.8703	0.93216	0.0048712	-0.0083877	0.99408	0.73626	0.082159	0.23525	0.82777	0.82659	0.012186	0.021509	0.99132	-0.49076	0.49786	0.28871	0.95049	-0.22178	0.91	0.61569	0.23694
sodium-bile acid cotransporter	contig00605	0.65461	0.32479	1.1859	0.22891	1.1514	0.053189	1.5453	0.077031	1.5563	0.0053515	1.4681	0.042908	1.7599	0.0003415	1.079	0.09255	0.73198	0.27766	1.0647	0.20939	1.2053	0.010537	1.7308	0.011738	0.50719	0.70149	1.0917	0.29334	1.2857	0.089684	1.9055	0.0068585
	contig00614	0.37903	0.11253	0.40432	0.33706	0.33328	0.1638	0.37608	0.54879	0.32111	0.17826	0.39067	0.19878	0.54091	0.003866	0.45697	0.066702	0.27172	0.31881	0.43224	0.19022	0.57098	0.0026406	0.52314	0.074039	-0.19238	0.72191	0.27018	0.70631	-0.16606	0.84155	0.41905	0.13303
	contig00619	0.38697	0.1585	0.25838	0.64609	0.32335	0.24416	0.051656	0.99997	0.44249	0.084344	0.12146	0.81629	0.72894	0.00073508	0.19709	0.61736	0.36023	0.2131	0.029385	0.97798	0.67052	0.0018744	0.22654	0.66843	-0.040566	0.9748	-0.004392	0.99989	0.27948	0.63029	0.32964	0.34831
	contig00626	-0.33957	0.64217	-0.89899	0.36988	-0.25799	0.71712	-1.5806	0.0292	0.080459	0.93223	-1.4109	0.032008	0.55288	0.21666	-1.1879	0.035855	0.025368	0.98264	-1.5348	0.020917	0.67867	0.12008	-1.4408	0.026311	-0.42455	0.74123	-0.81704	0.47915	-0.0013309	0.99991	-0.7329	0.29423
	contig00630	0.034852	0.97816	0.27184	0.86627	0.0054301	0.99666	-0.083348	0.99997	0.63569	0.3448	0.52191	0.59771	1.1751	0.014852	-0.25488	0.82849	0.4335	0.61387	0.20627	0.91858	1.3831	0.0046749	0.050459	0.98492	0.42792	0.78323	0.21335	0.99936	-0.28644	0.92926	0.40456	0.70896
orf2-encoded protein	contig00635	0.67831	0.0116	0.070262	0.92883	0.43889	0.10614	0.13029	0.99997	0.5883	0.020868	-0.10805	0.84945	0.91744	7.9951e-05	0.21859	0.57776	0.28666	0.3813	0.017648	0.98656	0.97648	7.3025e-05	0.0058144	0.99671	-0.31185	0.5165	0.029594	0.99936	-0.2477	0.72218	0.36216	0.30206
	contig00636	0.36115	0.30104	0.28359	0.68296	0.35232	0.29968	0.037566	0.99997	0.45368	0.1528	-0.062159	0.93625	0.61891	0.013097	-0.082207	0.90685	0.13988	0.78674	-0.070386	0.95311	0.70276	0.0053216	-0.0053805	0.99712	-0.34567	0.5472	-0.22741	0.94158	-0.084845	0.9667	0.12763	0.84478
	contig00637	0.052672	0.93982	0.45859	0.52509	0.32683	0.4234	0.076838	0.99997	0.14418	0.78918	-0.091988	0.91282	0.43549	0.13502	-0.13312	0.85392	0.025169	0.97344	-0.045119	0.97568	0.67279	0.017957	0.051192	0.97429	-0.32786	0.67031	-0.24107	0.9569	-0.54705	0.326	0.017358	0.98741
	contig00638	1.7018	0.46235	-5.5284	0.12516	-0.86844	0.73118	-4.526	0.26603	-1.0486	0.69121	-4.2615	0.075415	-0.74891	0.67426	-3.7479	0.057135	-1.3095	0.56606	-4.9926	0.049775	-0.69864	0.64587	-5.1981	0.060286	0.81798	0.80646	-0.22876	0.99936	0.33997	0.96888	0.22535	0.9603
acetyltransferase [Aeromicrobium marinum DSM 15272]	contig00639	0.46915	0.12919	0.22998	0.73956	0.49429	0.10209	0.10764	0.99997	0.50397	0.0853	0.054061	0.94285	0.87483	0.00043465	0.19603	0.68658	0.27226	0.4875	0.049145	0.96663	0.91451	0.00037011	0.17353	0.82049	-0.27762	0.6652	-0.11046	0.99936	-0.45109	0.34305	0.17133	0.76051
	contig00645	0.68134	0.058073	-0.024883	0.98315	0.55322	0.12502	-0.39311	0.87616	0.68802	0.042752	-0.3215	0.57416	0.90402	0.0017185	-0.19542	0.75421	0.78452	0.026234	-0.32408	0.65457	1.0094	0.00072186	-0.31071	0.66073	-0.018485	0.99205	0.054606	0.99936	-0.13215	0.94886	0.093211	0.91132
	contig00650	0.25312	0.48168	0.36633	0.54459	0.41574	0.17055	0.14586	0.99997	0.21162	0.57606	0.11268	0.85998	0.59168	0.011738	0.2916	0.46698	0.24439	0.54174	0.12488	0.88872	0.55599	0.017937	0.2018	0.76669	-0.065123	0.96006	0.053979	0.99936	0.29419	0.6732	0.43853	0.23782
	contig00656	0.22782	0.55923	0.26483	0.69919	0.30131	0.37437	0.087359	0.99997	0.2258	0.55756	0.17636	0.75779	0.60137	0.012897	0.29992	0.46734	0.15452	0.74945	0.30129	0.60249	0.33365	0.18192	0.19454	0.79087	-0.025884	0.98711	0.033386	0.99936	0.30298	0.67311	0.37972	0.35116
	contig00671	1.8181	0.27801	-0.8673	0.78321	1.582	0.25848	0.51418	0.99997	1.8404	0.17176	0.14602	0.96351	1.6889	0.092929	0.02858	0.99341	1.0991	0.50021	-0.31019	0.94997	2.5702	0.010624	-0.45242	0.90828	-0.19728	0.96388	0.18835	0.99936	-0.64388	0.85966	0.58744	0.70542
	contig00680	0.1035	0.81031	0.2465	0.67954	-0.046064	0.91312	0.032373	0.99997	0.26633	0.38571	-0.18331	0.70362	0.44744	0.037907	-0.041858	0.94781	0.23043	0.52345	-0.051197	0.96255	0.57749	0.00756	0.0078201	0.99548	-0.28007	0.59146	-0.17158	0.96604	-0.25402	0.70959	0.12301	0.82021
	contig00681	0.34175	0.21813	0.11828	0.86397	0.3349	0.21655	-0.011738	0.99997	0.25187	0.39623	-0.25406	0.52745	0.50615	0.014168	-0.30871	0.34303	0.050083	0.92026	-0.24615	0.629	0.44752	0.030088	-0.11585	0.87629	-0.396	0.30429	-0.055051	0.99936	-0.032022	0.98777	0.24929	0.52289
	contig00683	0.18302	0.72139	0.24152	0.77371	0.42628	0.25542	-0.14117	0.99997	0.052291	0.93269	-0.046804	0.95944	0.55887	0.047861	0.074544	0.92799	0.047898	0.94578	0.024614	0.9857	0.69163	0.013837	0.023874	0.9889	-0.21994	0.82619	0.12507	0.99936	0.21059	0.89013	0.50897	0.25515
	contig00686	0.7616	0.12107	0.19131	0.88332	0.48297	0.36323	-0.59791	0.80515	0.52622	0.31263	-0.89042	0.14408	0.90941	0.016851	-0.98922	0.05085	0.56242	0.31209	-0.8352	0.23435	1.2272	0.0017964	-0.53491	0.51458	-0.23555	0.87502	-1.2261	0.08355	-0.0644	0.9861	-1.1141	0.042098
ephrin receptor 5-like isoform 2	contig00688	0.18051	0.63784	0.29509	0.62198	0.38736	0.18566	-0.12215	0.99997	0.21031	0.55814	0.48994	0.17892	0.51667	0.021933	0.15648	0.75263	-0.044998	0.93543	0.20009	0.76312	0.4169	0.066267	0.32475	0.50386	0.031355	0.9821	-0.22427	0.92215	0.0035575	0.99945	0.2596	0.55236
isoform a	contig00691	0.92728	0.20145	0.60671	0.72982	0.15399	0.881	0.51959	0.99997	0.84616	0.24029	0.35192	0.8165	1.4243	0.0088575	-0.064686	0.97053	0.67011	0.43644	-0.024512	0.99247	0.70866	0.20997	0.026432	0.99436	0.13657	0.96473	-0.26825	0.99936	0.15278	0.97192	-0.035546	0.98672
low quality protein: protein	contig00698	-1.5217	0.23806	-1.7637	0.46013	-1.7332	0.15601	-1.6349	0.72878	-2.0853	0.070605	-3.0519	0.036418	-2.0626	0.029984	-3.6298	0.0031802	-2.6256	0.026445	-3.3321	0.025966	-2.3962	0.011823	-3.5616	0.009721	-1.7241	0.34704	-1.9053	0.43585	-2.7156	0.07327	-1.331	0.42384
	contig00706	0.84002	0.046593	-0.020118	0.98792	0.58817	0.17318	-0.027254	0.99997	0.60778	0.1528	-0.3154	0.66079	0.59986	0.076059	-0.47704	0.37384	0.6372	0.15296	-0.16633	0.89904	0.82096	0.014089	-0.48217	0.5031	0.25385	0.83571	0.10899	0.99936	0.4855	0.56303	0.65283	0.21184
	contig00709	0.63141	0.06309	-0.025937	0.98247	0.57757	0.088992	-0.18875	0.99997	0.62966	0.051203	-0.40945	0.39124	0.72426	0.0070245	-0.4733	0.23179	0.509	0.15486	-0.34021	0.59522	0.84965	0.0020547	-0.42417	0.43974	0.1015	0.93678	-0.32803	0.82751	0.39556	0.55128	0.37317	0.42808
	contig00719	0.81369	0.032267	0.29161	0.73935	0.43254	0.28912	0.18337	0.99997	0.76958	0.032378	-0.027359	0.97859	0.97484	0.0015333	0.097771	0.90827	0.43334	0.3311	0.07497	0.96037	0.93884	0.0023991	0.22428	0.81315	-0.27663	0.77104	-0.005559	0.99997	0.021873	0.99467	0.35238	0.54351
	contig00748	0.59383	0.073939	0.14037	0.87328	0.68947	0.03808	0.06634	0.99997	0.55183	0.084933	0.055037	0.94672	0.86376	0.0012371	0.27438	0.564	0.25453	0.57528	0.11617	0.91502	0.8516	0.0016396	0.061037	0.96338	-0.17554	0.8579	-0.019172	0.99936	0.034748	0.98873	0.41536	0.34317
glycosyl transferase family protein	contig00749	0.67671	0.43	-0.15022	0.94774	0.34462	0.71908	0.022218	0.99997	1.0749	0.13853	-0.60403	0.6122	1.4191	0.013622	0.045641	0.97835	1.0839	0.15967	-0.29945	0.8922	1.0464	0.070949	-0.4488	0.79955	0.28509	0.91005	0.22416	0.99936	0.24165	0.9556	-0.44067	0.73899
fad-dependent oxidoreductase domain containing 2-like	contig00750	0.35715	0.64946	-1.9334	0.023725	0.66865	0.28017	-0.69911	0.83115	-0.097759	0.92251	-0.39117	0.70408	0.58634	0.22201	-0.96126	0.13527	0.37409	0.65755	-0.7866	0.47985	0.5734	0.23289	-0.9211	0.26929	-0.37495	0.81434	0.065516	0.99936	-0.66837	0.56303	0.42847	0.71052
endonuclease-reverse transcriptase	contig00755	0.12473	0.83261	0.26399	0.75058	0.35272	0.38283	-0.089936	0.99997	0.18191	0.72424	-0.094576	0.91106	0.56451	0.050729	0.077462	0.92635	0.080092	0.90803	-0.36987	0.58676	0.67534	0.018562	0.084558	0.95139	0.069184	0.96619	0.11709	0.99936	0.043221	0.98777	0.1458	0.84543
endonuclease-reverse transcriptase	contig00759	0.066815	0.92545	0.48131	0.52421	0.2375	0.60798	0.20699	0.99997	0.27164	0.5692	0.18025	0.80702	0.96591	0.0014851	0.28719	0.60623	0.63031	0.10308	-0.0682	0.96332	0.87045	0.004006	0.33207	0.65222	0.29667	0.73847	-0.14192	0.99936	0.12773	0.95527	-0.053308	0.95954
	contig00769	0.024945	0.98171	0.24122	0.86082	0.4427	0.465	0.42831	0.99093	0.97668	0.050383	0.086908	0.94682	1.2241	0.0034343	0.049127	0.96735	0.92942	0.081121	0.14972	0.93747	1.1732	0.0051226	0.15326	0.93502	0.38741	0.76263	-0.038	0.99936	-0.21837	0.94107	0.21084	0.84543
zinc finger protein 132	contig00785	0.84198	0.54423	-3.9215	0.18196	-0.486	0.8003	-4.011	0.10141	-0.63129	0.67346	-4.3665	0.05105	-0.45196	0.61582	-3.9981	0.034192	0.54063	0.71767	-2.9104	0.1725	-0.096079	0.93329	-3.5541	0.1248	0.63073	0.84256	0.46526	0.99936	-1.0203	0.64637	-0.38713	0.90923
zinc finger protein 197- partial	contig00791	0.5511	0.050481	0.17391	0.79746	0.49924	0.0753	0.069009	0.99997	0.3552	0.22564	-0.18889	0.70676	0.60329	0.0069278	-0.073396	0.90685	0.38836	0.20545	-0.15377	0.83658	0.64988	0.0040664	0.088263	0.92801	-0.28746	0.59809	0.12718	0.99869	0.0034525	0.99945	0.19646	0.68712
	contig00795	0.19075	0.78354	0.17094	0.89046	0.4995	0.30755	0.04428	0.99997	0.55706	0.24177	-0.054308	0.96289	1.3778	0.00026181	0.52046	0.36285	0.59359	0.23883	0.27509	0.80608	0.92921	0.009794	-0.089571	0.96092	0.63643	0.36608	-0.67597	0.49154	0.97818	0.089684	0.16613	0.86213
zinc finger protein 84	contig00796	0.56273	0.023276	0.16274	0.78536	0.60377	0.018486	0.028497	0.99997	0.34299	0.17545	-0.2692	0.46727	0.61794	0.0020436	-0.26387	0.41597	0.24242	0.43846	0.0062333	0.99439	0.75314	0.00037778	0.044372	0.96466	-0.28423	0.52119	0.058915	0.99936	-0.13189	0.91118	0.24504	0.50571
gastrula zinc finger protein	contig00797	0.33758	0.55061	0.13685	0.91319	0.27328	0.6208	-0.11038	0.99997	0.33267	0.55196	0.0063748	0.99638	0.54676	0.12982	-0.34777	0.59387	0.067721	0.93832	-0.094583	0.95669	1.1193	0.002041	0.20037	0.87388	-0.047641	0.98272	0.36988	0.90407	-0.061437	0.9858	0.54085	0.36725
	contig00801	0.40444	0.31194	0.44731	0.54063	0.39039	0.31599	0.035075	0.99997	0.35727	0.37776	-0.043109	0.96289	0.52101	0.06999	-0.094749	0.9065	0.32816	0.48017	-0.11228	0.92786	0.67587	0.017532	0.15434	0.88235	-0.082962	0.95591	-0.10263	0.99936	-0.41973	0.55196	0.053978	0.95562
	contig00812	1.4979	0.04363	-0.38432	0.84043	0.71967	0.38531	0.22151	0.99997	0.73948	0.3768	-0.091318	0.9618	1.1342	0.055543	-0.052083	0.97585	0.33018	0.78608	-0.16386	0.95396	0.96815	0.10459	0.86432	0.49069	-0.35035	0.88015	0.53129	0.94384	-0.18695	0.96938	0.96218	0.32262
	contig00820	1.1454	0.043719	0.53933	0.66116	1.1219	0.049784	0.33576	0.99997	1.4906	0.0053691	0.063641	0.96574	2.0036	5.0997e-05	0.028189	0.98384	2.0107	0.00047078	0.38016	0.78169	1.6951	0.00043431	0.45173	0.70434	0.94944	0.23519	0.13884	0.99936	1.0586	0.17629	0.12316	0.92954
	contig00843	0.37214	0.46639	0.062977	0.96632	0.53631	0.22823	0.2032	0.99997	1.0678	0.0076214	0.15059	0.87114	1.5062	4.7849e-05	0.062299	0.95054	0.89144	0.034196	-0.024895	0.98736	1.2491	0.00049901	0.19296	0.87241	0.50027	0.50123	0.58405	0.56822	0.14502	0.95509	0.25255	0.74656
	contig00844	0.30984	0.29076	0.10446	0.88483	0.16547	0.61415	-0.14815	0.99997	0.067897	0.87824	-0.3807	0.28655	0.25696	0.24456	-0.10978	0.83201	-0.047352	0.92621	-0.13913	0.84828	0.5132	0.014777	-0.18669	0.75522	-0.28439	0.56806	-0.24825	0.84923	-0.23778	0.73755	0.0066701	0.99339
	contig00849	0.81107	0.023668	-0.09359	0.92865	0.91078	0.014466	-0.12396	0.99997	0.54376	0.12885	-0.36175	0.50909	0.76386	0.0075217	-0.43859	0.32303	0.66802	0.06553	-0.064473	0.96386	1.1105	0.00031659	0.069431	0.96204	0.11152	0.93443	-0.12298	0.99936	0.43958	0.51129	0.0037259	0.99702
predicted protein [Nematostella vectensis]	contig00857	1.2944	0.083808	0.71002	0.65444	1.5593	0.06003	0.34597	0.99997	1.1165	0.12921	0.87796	0.40458	1.2844	0.028548	0.5818	0.59041	1.975	0.0073679	0.4073	0.83512	1.3092	0.025385	0.73488	0.58814	0.62042	0.71197	-0.49132	0.95929	1.0946	0.35244	-0.19303	0.91106
	contig00860	-0.04875	0.96342	0.3583	0.7753	0.26757	0.69637	0.11845	0.99997	0.31234	0.665	0.15623	0.89727	0.88739	0.034308	-0.17663	0.87407	0.33808	0.66012	0.53425	0.59304	0.69927	0.099306	0.30716	0.8175	0.20806	0.91005	0.14083	0.99936	0.14259	0.9667	0.24609	0.81509
	contig00861	0.2099	0.63899	0.45906	0.49053	0.35677	0.32275	0.32789	0.92171	0.31854	0.40157	0.41607	0.36825	0.79882	0.0027027	0.83187	0.015665	0.27806	0.53151	0.37465	0.52326	0.74438	0.0051334	0.58336	0.2	0.15762	0.87955	0.51881	0.44783	0.086131	0.96809	0.72927	0.054825
porin precursor	contig00869	0.95713	0.059821	0.22125	0.86916	0.88648	0.079324	-0.13828	0.99997	0.86076	0.078347	-0.24803	0.80065	1.5141	0.00030886	-0.33772	0.67318	1.2366	0.013159	-0.11472	0.95227	1.3688	0.001052	-0.10618	0.95839	0.44111	0.69344	-0.15328	0.99936	0.87692	0.22361	-0.22898	0.82026
origin recognition subunit 3	contig00873	0.52285	0.27904	0.27641	0.79406	0.64569	0.14898	0.16313	0.99997	0.54148	0.24198	0.079043	0.94282	0.74681	0.032354	0.2495	0.74095	0.34837	0.56199	0.36075	0.69937	0.53658	0.13183	0.32227	0.73965	0.21777	0.87358	0.13067	0.99936	0.057264	0.9861	0.48824	0.42456
predicted protein [Nematostella vectensis]	contig00874	0.74285	0.30227	0.76251	0.57048	0.99726	0.12833	1.0114	0.58966	0.60871	0.41691	1.6532	0.036418	0.30255	0.61314	0.575	0.52626	0.48507	0.59235	0.62174	0.61904	0.87879	0.091272	0.94641	0.32581	0.052152	0.98827	-0.18011	0.99936	0.045956	0.99258	0.094181	0.9585
kelch-like 35	contig00879	0.37949	0.18742	0.14653	0.83278	0.53792	0.050636	-0.12408	0.99997	0.50311	0.054705	-0.31553	0.42717	0.88986	0.00012601	-0.21723	0.58598	0.62797	0.019819	-0.24426	0.66201	0.87449	0.00022793	-0.24306	0.64955	0.21595	0.73876	-0.075788	0.99936	0.20526	0.82331	-0.087136	0.88523
	contig00880	1.2123	0.021761	0.27272	0.84121	0.70801	0.19441	-0.083055	0.99997	0.50876	0.40068	0.45515	0.59656	0.73898	0.081969	-0.14663	0.90116	0.36258	0.63118	0.29829	0.82947	0.70483	0.09728	0.038783	0.98746	0.090927	0.97071	-0.026406	0.99936	0.01544	0.99837	0.74075	0.2713
tripartite motif-containing 56	contig00881	0.3203	0.57206	0.11842	0.92661	0.59168	0.1908	0.23483	0.99997	0.43465	0.38148	0.3115	0.68366	0.81212	0.019623	0.56508	0.2864	0.57699	0.23851	0.47298	0.55155	0.6017	0.087496	0.42798	0.59992	0.028208	0.99027	0.29394	0.95766	-0.16026	0.95053	0.7541	0.15527
tripartite motif-containing 2	contig00882	0.28882	0.36791	0.2125	0.74082	0.47597	0.09021	0.18619	0.99997	0.21427	0.53818	0.24056	0.59634	0.45267	0.041883	0.34331	0.31853	0.19578	0.62178	0.21985	0.71646	0.58992	0.0080962	0.3892	0.36786	-0.10656	0.91377	0.32469	0.70023	0.055957	0.97659	0.50827	0.12484
single chain fv antibody fragment	contig00884	1.7291	0.023384	0.07087	0.97903	1.5719	0.041773	-0.1263	0.99997	1.6878	0.019015	-0.45071	0.75202	2.0113	0.001199	-0.067214	0.96946	1.5519	0.040886	-0.0076316	0.9977	2.1754	0.00068026	-0.49506	0.78596	-0.075725	0.98423	-0.40178	0.98932	0.51776	0.85273	-0.36241	0.81042
	contig00886	0.53119	0.19684	0.49645	0.52593	0.52139	0.1936	-0.080309	0.99997	0.40093	0.35351	-0.0063696	0.9952	0.59304	0.056459	0.0034818	0.99813	0.40725	0.39013	0.23545	0.80715	0.64577	0.036321	0.25555	0.78037	-0.75007	0.14736	0.16894	0.99936	-0.14494	0.94846	0.31892	0.61198
	contig00887	2.91	0.016552	0.24257	0.95064	2.83	0.023533	0.21684	0.99997	3.431	0.0033031	0.090936	0.9781	4.4253	3.7483e-05	0.19192	0.94741	3.3436	0.0058438	0.2504	0.95852	3.8519	0.0002637	0.24995	0.95936	1.606	0.41717	0.25058	0.99936	2.3747	0.14835	0.35499	0.899
	contig00895	0.38107	0.21393	0.21528	0.74367	0.49476	0.087099	-0.18901	0.99997	0.42853	0.13625	-0.085984	0.89631	0.79791	0.00071219	0.22565	0.5927	0.33873	0.30835	0.022471	0.98503	0.81667	0.00069778	-0.059133	0.95908	0.061735	0.96065	-0.18602	0.96363	0.23052	0.80153	0.12172	0.83606
	contig00899	0.044446	0.93615	0.33681	0.57125	0.34915	0.24911	-0.14286	0.99997	0.0075132	0.98967	0.1291	0.82156	0.51581	0.023406	0.12779	0.81464	0.038397	0.94649	0.037411	0.97491	0.63565	0.0056725	0.30047	0.55683	0.019911	0.9896	0.30968	0.75415	0.11123	0.94649	0.41307	0.25484
	contig00902	0.51224	0.13114	0.40871	0.54488	0.36945	0.30112	0.089106	0.99997	0.56861	0.075282	0.21684	0.71454	0.8617	0.0013096	0.29279	0.52724	0.43544	0.23743	0.21791	0.78622	0.796	0.002944	0.36317	0.52533	-0.16346	0.87364	0.086902	0.99936	0.002196	0.99945	0.42582	0.32893
protein	contig00908	0.94259	0.031105	0.1612	0.89213	0.76113	0.12313	0.10301	0.99997	0.60752	0.17088	0.30719	0.68723	0.54395	0.12469	-0.35252	0.5781	0.40477	0.4714	-0.070774	0.96715	0.84092	0.015308	0.0096918	0.99638	-0.050809	0.98151	0.23405	0.98787	-0.047229	0.98867	0.26746	0.7362
	contig00933	0.6954	0.072453	0.18972	0.84786	0.41229	0.32324	0.078472	0.99997	0.59843	0.11385	0.0076247	0.9944	1.0448	0.00084962	0.24734	0.69027	0.49477	0.25025	0.060672	0.96795	0.80246	0.0086154	0.14876	0.89844	-0.072164	0.96681	-0.016109	0.99936	0.089827	0.97152	0.30905	0.62115
myosin heavy chain	contig00941	-0.20313	0.86078	0.18594	0.9259	-0.06134	0.95682	-0.076899	0.99997	1.1322	0.089081	-0.70363	0.49638	1.2842	0.017685	-0.78637	0.36313	1.1454	0.10358	-0.2234	0.92327	1.427	0.0087288	-0.19189	0.93898	-0.20003	0.93923	-0.48707	0.94575	-0.23976	0.95291	-0.32399	0.81033
myosin heavy chain	contig00943	-0.32157	0.687	0.50951	0.68605	0.29128	0.69343	-0.16159	0.99997	1.6526	0.0025574	-0.76576	0.327	1.9551	6.9133e-05	-0.63171	0.38775	1.7861	0.0017826	-0.0059671	0.9977	1.6402	0.00060747	-0.12664	0.95468	1.4937	0.033726	-1.385	0.11145	1.1296	0.13594	-1.0907	0.10267
myosin heavy chain	contig00944	0.36932	0.67864	0.39181	0.80112	0.099257	0.92242	0.24105	0.99997	1.3331	0.027429	-0.4075	0.72618	1.5775	0.0022004	-0.52655	0.56949	1.085	0.098645	0.2382	0.90768	1.6921	0.001321	0.085901	0.97573	0.05269	0.98783	-0.3736	0.97852	-0.11094	0.98052	-0.22982	0.86582
myosin heavy chain	contig00946	-1.0735	0.098835	0.6022	0.66482	0.071272	0.94639	0.31138	0.99997	0.96312	0.12977	-0.24832	0.85506	1.1924	0.01837	-0.66147	0.43089	1.0904	0.09585	0.41149	0.79071	1.2551	0.013181	0.15362	0.95043	1.2858	0.12542	-0.55818	0.88066	1.0183	0.28754	-0.22822	0.86671
myosin heavy chain	contig00947	-0.7015	0.55566	0.67034	0.75645	0.59108	0.60728	0.8795	0.93744	1.3365	0.15598	0.024496	0.99315	1.7474	0.018108	-0.19571	0.92802	1.5988	0.09491	0.43831	0.86854	1.7935	0.015344	0.1902	0.95939	0.99444	0.57029	-0.55254	0.97773	0.88358	0.70304	-0.2437	0.91123
	contig00969	0.21477	0.54712	0.25488	0.67957	0.13266	0.72131	-0.091095	0.99997	0.25568	0.43648	-0.19042	0.70264	0.76163	0.00089381	-0.10776	0.84796	0.3096	0.35537	0.011478	0.99057	0.58468	0.0089751	-0.054845	0.9614	-0.011668	0.99466	-0.28043	0.80899	0.20619	0.83087	-0.080539	0.89959
	contig00972	0.010067	0.98861	0.19109	0.81205	0.29785	0.41959	-0.099877	0.99997	0.18264	0.68404	-0.11986	0.86478	0.49994	0.054125	-0.14791	0.80862	-0.0025663	0.99738	-0.13256	0.89334	0.57779	0.024837	-0.016025	0.9918	-0.19023	0.8402	-0.18471	0.9793	-0.015882	0.99604	0.12325	0.85867
	contig00975	0.193	0.5921	0.079216	0.91969	0.0096648	0.98393	-0.17565	0.99997	0.18403	0.60993	-0.28581	0.4919	0.6239	0.0045366	-0.18142	0.68086	0.20594	0.5925	0.032907	0.97704	0.46274	0.034121	-0.17071	0.79907	-0.0026131	0.99757	-0.10044	0.99936	0.2312	0.77442	0.090379	0.88042
	contig00981	0.58381	0.19621	0.097306	0.93985	0.72138	0.092844	0.4721	0.87516	0.62608	0.14384	0.093772	0.92723	0.59966	0.080301	-0.053985	0.95613	0.40225	0.46089	-0.054433	0.97545	0.74836	0.027025	0.23909	0.82819	-0.32464	0.75208	-0.21253	0.99573	-0.3408	0.8028	-0.21277	0.79753
white-brown-complex abc transporter family	contig00985	2.5941	0.00053618	2.0248	0.050774	1.7788	0.017258	1.4844	0.26603	2.2478	0.0015249	0.93114	0.3526	2.0698	0.00050869	1.6983	0.023959	1.6063	0.024459	1.3469	0.18318	2.2955	0.00024479	1.2187	0.22441	1.1068	0.29922	1.0946	0.47719	0.81644	0.58081	1.882	0.022342
atp-binding cassette subfamily member group wbc protein 3	contig00987	0.58317	0.36775	0.75244	0.51064	0.58691	0.34365	0.0022935	0.99997	2.034	0.00038199	-0.028758	0.98481	2.2663	1.1482e-05	0.19573	0.8667	1.8245	0.0012978	0.28385	0.85547	1.7382	0.00032296	0.19518	0.91481	1.0013	0.19448	-0.70695	0.63662	0.58949	0.63953	-0.27853	0.79952
white-brown-complex abc transporter family	contig00988	0.56898	0.33645	0.7881	0.44653	0.43284	0.47997	0.087273	0.99997	1.556	0.0021631	0.12956	0.91669	2.0286	1.774e-05	0.27726	0.76489	1.465	0.0049851	0.33173	0.79703	1.6143	0.00032666	0.21757	0.88992	0.38338	0.77014	-0.32568	0.96937	0.16997	0.95792	-0.021574	0.98952
cholesterol 25-hydroxylase	contig00997	0.16785	0.88431	0.95437	0.46049	0.29531	0.73564	0.57899	0.96261	0.52527	0.51264	1.1388	0.17337	1.2773	0.013831	0.82805	0.29745	0.83226	0.25972	0.56057	0.67798	0.99079	0.05736	1.1466	0.20257	1.2564	0.14931	0.19812	0.99936	0.98022	0.34305	0.51453	0.63242
lumbrokinase	contig01012	0.35849	0.76945	-0.41839	0.84021	0.67367	0.47163	-0.63126	0.99651	0.91356	0.29066	-1.1996	0.26392	1.1688	0.070135	-1.3658	0.12358	1.4751	0.070676	-0.88737	0.53872	1.0586	0.10224	-0.71778	0.64888	1.3553	0.23006	-0.52572	0.96106	2.0436	0.032907	-0.52415	0.71715
lumbrokinase-3 precursor	contig01014	1.7284	0.57767	1.325	0.79746	1.7981	0.52829	0.86284	0.99997	4.5742	0.045375	0.33908	0.94985	6.2612	0.001321	0.10797	0.98353	4.0089	0.10495	1.0886	0.8534	4.1692	0.028345	0.76424	0.91115	2.5574	0.56988	-1.7937	0.90133	2.8519	0.53834	-1.3035	0.73868
orf2-encoded protein	contig01019	0.33416	0.26805	0.34241	0.54102	0.43098	0.1213	0.099559	0.99997	0.34154	0.23831	0.11889	0.83063	0.86125	0.000197	0.24866	0.51661	0.24357	0.50142	0.52381	0.17145	0.71019	0.0016841	0.17864	0.78582	0.064288	0.95479	0.039728	0.99936	-0.05684	0.97641	0.14426	0.78605
atp-binding sub-family b (mdr tap) member 4	contig01025	0.2783	0.88111	-0.35635	0.90318	1.6011	0.18181	-0.7725	0.99093	0.28083	0.87398	-1.3738	0.28421	1.8024	0.033459	-0.97825	0.43778	0.29654	0.87773	-1.4861	0.30654	2.0234	0.016965	-1.4861	0.27967	-0.23401	0.95105	0.10127	0.99936	-0.39181	0.94338	0.36749	0.87231
b chain structure of p-glycoprotein reveals a molecular basis for poly-specific drug binding	contig01028	0.99931	0.24211	0.98133	0.59422	0.82228	0.3445	1.0171	0.85345	1.0746	0.18415	0.83	0.54937	1.2563	0.046634	-0.16027	0.93893	0.43896	0.7173	0.092719	0.97896	0.75592	0.2511	0.46614	0.8422	0.27225	0.92531	0.32575	0.99936	-0.16841	0.97455	0.92459	0.39346
voltage-dependent anion channel 2	contig01039	0.53611	0.20339	0.27173	0.77308	0.6582	0.099322	0.32586	0.99093	0.37279	0.4178	0.068566	0.94443	0.76737	0.014928	-0.0057447	0.99608	0.14249	0.83584	-0.0011804	0.99917	0.89668	0.0049564	0.16769	0.88564	-0.37271	0.65563	0.029174	0.99936	-0.58346	0.36165	0.25357	0.72341
_6-like	contig01044	0.22001	0.50169	0.28498	0.60914	0.25401	0.39484	0.074124	0.99997	0.16787	0.63639	0.049301	0.9408	0.59428	0.0050557	0.36229	0.25009	0.036994	0.94443	0.14506	0.83746	0.59691	0.0051338	0.20069	0.7279	-0.17482	0.81055	0.17104	0.96394	-0.20971	0.80822	0.34753	0.3183
	contig01045	0.65314	0.063522	-0.032292	0.97903	0.77024	0.029755	0.049738	0.99997	0.53101	0.12721	-0.099005	0.90282	0.88491	0.0017421	0.0087651	0.99288	0.32457	0.47108	-0.010591	0.9926	1.0166	0.00055851	0.044031	0.97744	-0.25482	0.77092	0.36329	0.78166	-0.13561	0.94649	0.53345	0.22006
bromodomain adjacent to zinc finger 1a	contig01053	0.9175	0.37864	1.3249	0.51631	0.75652	0.47158	0.34999	0.99997	0.80692	0.44892	0.74904	0.6659	1.4206	0.049127	0.55259	0.75447	0.54913	0.68193	0.35642	0.91502	0.47349	0.56104	0.13625	0.97568	0.60211	0.80538	0.20761	0.99936	-0.1539	0.98052	0.72879	0.62115
	contig01056	0.38242	0.83306	0.88407	0.72848	0.4684	0.75671	0.59072	0.99997	2.6891	0.010085	0.37534	0.87918	0.8583	0.369	0.65515	0.72519	0.42857	0.8201	0.45833	0.89242	0.87536	0.35606	0.39744	0.91101	0.084615	0.98929	0.087185	0.99936	-0.056546	0.99566	0.50009	0.82223
	contig01058	-0.15191	0.7678	-0.2338	0.77006	-0.48114	0.16535	-0.63926	0.35077	-0.20809	0.64837	-0.5043	0.26485	-0.21271	0.47873	-0.71009	0.046659	-0.59165	0.08829	-0.42764	0.45094	-0.28001	0.32933	-0.78739	0.060286	-0.65571	0.14598	-0.6274	0.29087	-0.86296	0.032638	-0.2425	0.67805
	contig01068	0.24637	0.42788	0.26407	0.63408	0.33084	0.23051	-0.0061376	0.99997	0.39023	0.13847	-0.16062	0.7417	0.88748	8.4472e-05	-0.1699	0.68984	0.41645	0.13063	-0.075601	0.93716	0.79461	0.00039097	-0.050259	0.96298	0.0451	0.97081	-0.25063	0.83821	0.1179	0.93492	-0.085427	0.88253
	contig01070	0.57341	0.20584	0.33419	0.73354	0.98012	0.024613	0.60716	0.67598	0.71077	0.087583	0.3296	0.64749	0.85023	0.012088	0.62704	0.2024	0.65595	0.14453	0.25344	0.81464	1.0664	0.0021947	0.67338	0.27351	0.13722	0.93249	0.40853	0.83544	0.085683	0.97659	0.52394	0.36173
	contig01072	0.072996	0.86695	0.23229	0.67954	0.13055	0.69427	-0.043554	0.99997	0.16521	0.62588	-0.090256	0.87231	0.53268	0.0087636	-0.20514	0.58183	0.14579	0.70773	0.071583	0.93841	0.45816	0.023896	-0.041168	0.9706	-0.066605	0.94646	-0.29853	0.6958	-0.017732	0.99271	-0.15177	0.74729
protein	contig01075	0.17056	0.67633	0.30885	0.61606	0.16873	0.64987	0.0025273	0.99997	0.59059	0.033792	-0.12808	0.82849	0.80849	0.00077528	-0.20346	0.6571	0.45396	0.14213	1.6353e-05	0.99998	0.71228	0.0028028	-0.080433	0.94145	-0.18479	0.82285	-0.50061	0.37454	-0.053933	0.97873	-0.15209	0.78864
	contig01078	0.074268	0.88095	0.289	0.62521	0.095884	0.80981	-0.049101	0.99997	0.52892	0.049886	-0.084182	0.89637	0.74784	0.0011283	-0.23925	0.55474	0.38884	0.20813	-0.073883	0.94281	0.62497	0.0057168	-0.059478	0.95837	-0.06735	0.95383	-0.45936	0.41334	0.010184	0.99748	-0.12534	0.82615
protein	contig01080	0.0059041	0.99227	0.36033	0.50505	0.03562	0.93524	0.24979	0.9398	0.29445	0.31157	0.40882	0.24987	0.49964	0.018796	0.55054	0.051858	0.090464	0.84824	0.46334	0.23978	0.40644	0.05724	0.43646	0.25153	-0.12138	0.88805	0.067088	0.99936	-0.15133	0.90106	0.52242	0.095526
nuclear factor related to kappa-b-binding protein	contig01081	0.19272	0.79869	0.27512	0.81865	0.28503	0.63786	0.39198	0.99093	0.62057	0.21479	0.2384	0.79928	0.97921	0.010374	0.32514	0.66861	0.74498	0.14109	0.41984	0.67367	1.2361	0.0017342	0.3009	0.79661	-0.084924	0.96955	0.56254	0.6952	-0.28402	0.89131	0.77959	0.18715
	contig01083	-0.44109	0.35894	-0.051032	0.97323	0.16796	0.77023	0.25246	0.99997	0.74936	0.064554	-0.33479	0.63392	0.70227	0.035922	0.0096465	0.99321	0.72	0.095673	-0.05391	0.9754	0.90901	0.0068806	-0.031997	0.98694	0.72997	0.21233	0.20349	0.99593	0.14987	0.95289	0.08493	0.93515
nuclear factor related to kappa b binding protein	contig01084	0.1174	0.90597	0.37608	0.76751	0.4179	0.51217	0.45294	0.98032	0.77014	0.15701	0.42758	0.6348	1.0141	0.017502	0.46513	0.54293	0.84708	0.13325	0.68331	0.44781	1.1389	0.0079949	0.57819	0.53999	0.013047	0.99568	0.31004	0.97855	0.22875	0.93906	0.6474	0.37597
phosphoenolpyruvate carboxykinase	contig01089	0.54692	0.1589	-0.024399	0.98469	0.51626	0.17691	-0.19851	0.99997	0.072558	0.90952	-0.33695	0.57205	0.42372	0.16533	-0.37412	0.45332	0.07399	0.91819	-0.20061	0.84085	0.69553	0.018648	-0.18639	0.85559	-0.46455	0.45885	0.2291	0.97131	0.10565	0.96558	0.44986	0.37269
phosphoenolpyruvate carboxykinase	contig01091	0.67495	0.1189	0.082487	0.95233	0.40456	0.39488	-0.34184	0.99093	0.56263	0.19717	-0.68659	0.21396	0.95575	0.0046801	-0.53716	0.296	0.51629	0.28632	-0.38013	0.65974	1.0197	0.0029438	-0.3794	0.64518	-0.42089	0.61651	-0.086534	0.99936	-0.086241	0.97659	0.27497	0.71769
	contig01095	0.4183	0.1673	0.46523	0.40324	0.72095	0.016179	0.21035	0.99975	0.63781	0.019478	0.065505	0.92405	0.90681	0.00019581	0.18217	0.70171	0.64435	0.02452	0.11574	0.89702	0.80478	0.00086066	0.25392	0.65746	0.022793	0.98857	-0.16798	0.97852	0.0038128	0.99945	-0.058151	0.9354
	contig01096	0.45342	0.084241	0.31452	0.55536	0.49367	0.057835	0.10428	0.99997	0.64204	0.0084204	0.060138	0.92175	0.92474	4.4646e-05	0.046022	0.94023	0.6731	0.0087199	0.13146	0.85378	0.84531	0.0001929	0.29906	0.49783	-0.10636	0.90504	-0.00054396	0.99997	0.0082115	0.99813	0.2275	0.57507
	contig01097	0.36328	0.36244	0.28323	0.7213	0.20977	0.63023	-0.029302	0.99997	0.32517	0.42072	-0.10014	0.90084	0.57116	0.039414	-0.09982	0.89708	0.3931	0.33798	-0.099295	0.93786	0.52162	0.060448	0.10408	0.93383	-0.54121	0.28692	-0.2495	0.94419	-0.29284	0.77385	-0.04673	0.96171
	contig01101	0.53029	0.15299	0.015226	0.98973	0.38753	0.31838	-0.29798	0.98338	0.2944	0.498	-0.65614	0.14798	0.62073	0.028726	-0.3111	0.53864	0.53039	0.16463	-0.023723	0.98637	0.66221	0.019478	-0.14749	0.89086	-0.32161	0.67914	-0.16821	0.99831	0.079765	0.97192	-0.13799	0.85456
	contig01104	-0.44958	0.74809	-0.65633	0.76608	0.10257	0.94746	-0.21256	0.99997	-0.33807	0.83841	0.39852	0.8332	-0.93885	0.28693	-0.43187	0.80564	-0.52614	0.71277	-0.42174	0.87561	-1.73	0.037785	0.2502	0.94341	-0.11692	0.98043	0.69896	0.93564	-0.26408	0.96558	-0.071604	0.98143
	contig01107	0.26021	0.30433	0.21117	0.67296	0.33663	0.14664	-0.11884	0.99997	0.32555	0.15746	-0.086927	0.85936	0.72881	0.00015347	-0.095747	0.82815	0.28353	0.27324	-0.059383	0.94281	0.75483	0.00016722	0.0071692	0.99529	-0.21508	0.65046	-0.17657	0.92835	-0.11709	0.9175	0.037629	0.95063
	contig01112	-1.2817	0.035803	0.35023	0.81777	-0.015759	0.98833	0.23344	0.99997	-0.066957	0.95049	0.29943	0.80103	0.11686	0.84963	0.095038	0.94755	0.13477	0.90832	0.25951	0.88666	0.17724	0.76314	0.30996	0.85157	0.13407	0.96006	0.010396	0.99988	-0.26786	0.93546	0.0044387	0.9981
	contig01114	0.38776	0.23996	0.31985	0.61789	0.45386	0.14455	0.01739	0.99997	0.67448	0.019205	-0.024234	0.9768	0.84814	0.00071914	0.063674	0.92875	0.4573	0.15983	0.075782	0.94678	0.91709	0.00041897	0.16635	0.83343	-0.11423	0.91684	-0.20823	0.95319	0.032304	0.98873	0.22739	0.66015
protein	contig01132	0.69875	0.28583	0.75265	0.53108	0.76889	0.21312	0.27321	0.99997	1.3093	0.019112	0.0053619	0.99747	2.2223	2.561e-05	0.29315	0.78641	1.5054	0.010111	0.14903	0.94579	1.7454	0.00049858	0.40227	0.76922	0.63478	0.56964	-0.3493	0.97807	0.63483	0.62478	-0.099635	0.94958
	contig01141	0.54738	0.33556	-0.16147	0.90881	0.3567	0.55744	-0.35926	0.99997	0.60777	0.25409	-0.037649	0.97804	0.87769	0.028129	-0.27968	0.74931	0.23892	0.76963	-0.22797	0.87532	0.61282	0.13319	-0.34256	0.7674	-0.25427	0.87047	-0.31052	0.97055	0.23725	0.92926	0.34317	0.69806
low quality protein: chymotrypsin-like protease ctrl-1-like	contig01151	0.84684	0.32682	0.06489	0.98073	1.1205	0.15238	-0.39833	0.99997	1.5495	0.033047	-0.83804	0.46311	2.0974	0.00084962	-1.0774	0.23146	1.8805	0.013394	-0.5711	0.73987	1.8319	0.0032062	-0.58172	0.7266	1.0013	0.5074	-0.49506	0.96363	1.6749	0.14719	-0.39106	0.79274
epidermis specific serine protease	contig01153	0.93074	0.33489	0.75294	0.6937	0.77314	0.42827	1.2427	0.66108	1.7114	0.03441	0.72138	0.60777	2.6779	0.00019295	0.70652	0.56804	1.5706	0.06971	0.99898	0.50481	1.6864	0.013013	1.0685	0.44226	0.52752	0.82764	-0.038027	0.99936	1.1496	0.43669	0.53062	0.73331
programmed cell death	contig01161	1.1468	0.002961	-0.086087	0.94043	0.75234	0.04989	-0.25322	0.99997	0.86763	0.015175	-0.50837	0.33181	0.96715	0.0016774	-0.65198	0.11968	0.59267	0.13874	-0.52042	0.39903	1.1179	0.00050786	-0.31589	0.68522	-0.45455	0.49227	-0.047987	0.99936	-0.094796	0.96951	0.28036	0.66465
c3 and pzp-like alpha-2-macroglobulin domain-containing protein 8	contig01167	0.5277	0.54475	0.71045	0.62349	0.60484	0.44353	0.17238	0.99997	0.73693	0.32779	0.050911	0.97816	1.3457	0.013543	0.1079	0.94741	1.2513	0.072775	0.40265	0.81764	0.80318	0.15083	0.45784	0.77522	1.0211	0.32195	0.14147	0.99936	2.0976	0.0062128	0.28006	0.84394
c3 and pzp- alpha-2-macroglobulin domain containing 8	contig01168	-0.14218	0.88095	0.49371	0.67872	0.61536	0.28938	0.22739	0.99997	0.67629	0.23313	-0.098091	0.94255	1.0715	0.012512	0.065822	0.9585	0.86804	0.12329	0.2135	0.89904	1.5823	0.0005242	0.20157	0.90518	0.22135	0.90556	0.15506	0.99936	0.6282	0.55932	0.27085	0.79617
thap domain containing 4	contig01177	0.64572	0.081525	0.35495	0.65202	0.56274	0.12871	-0.047704	0.99997	0.52504	0.15579	0.095404	0.91146	0.64168	0.027243	-0.13106	0.86272	0.12647	0.84326	0.036866	0.97965	0.65328	0.024419	0.010251	0.99548	-0.47852	0.42024	0.070462	0.99936	-0.48548	0.44865	0.13975	0.85749
	contig01189	0.25024	0.59041	0.15964	0.86566	0.0031522	0.99666	0.016679	0.99997	0.41146	0.27863	-0.13403	0.86204	0.68616	0.015032	0.13873	0.84462	0.17987	0.75007	-0.13373	0.90677	0.68052	0.015904	0.043255	0.97812	-0.23255	0.81258	0.071268	0.99936	-0.26999	0.8214	0.35581	0.49651
	contig01206	0.063394	0.87736	0.52363	0.16938	0.53663	0.025358	0.30209	0.77932	0.37532	0.10509	0.4843	0.10332	0.68498	0.00043463	0.75069	0.0022666	0.19284	0.54498	0.53435	0.089657	0.65331	0.00086982	0.5873	0.04331	0.30203	0.43768	0.20629	0.88066	0.17691	0.82331	0.50165	0.062932
	contig01212	-0.15908	0.81327	-0.058824	0.96877	0.024537	0.97354	-0.32507	0.99711	0.6137	0.14886	-0.46849	0.45429	1.0085	0.002957	-0.57901	0.24601	0.59706	0.19293	-0.47996	0.52063	0.62823	0.062321	-0.38245	0.64189	0.54626	0.42858	-0.78812	0.28687	0.3691	0.75249	-0.6952	0.17862
cg9395 cg9395-pa	contig01231	1.0641	0.075981	0.033748	0.9864	1.243	0.061815	0.5256	0.96261	1.3074	0.019478	0.67428	0.43882	1.7542	0.00037271	0.83587	0.22868	1.5163	0.0097902	0.83436	0.3796	1.45	0.0026479	0.95978	0.25593	1.1616	0.14093	0.18489	0.99936	1.015	0.234	0.20705	0.87051
ubiquinol-cytochrome c reductase core protein ii	contig01239	0.58375	0.10611	0.079184	0.94142	0.44975	0.22532	-0.015458	0.99997	0.62753	0.065756	-0.3878	0.46161	0.91527	0.0014339	-0.4339	0.32115	0.3821	0.36988	-0.22269	0.79979	1.005	0.00070574	-0.26559	0.73072	-0.30949	0.69363	-0.12622	0.99936	-0.040317	0.98823	0.20868	0.74978
high density lipoprotien binding protein vigilin	contig01244	0.11602	0.84117	0.50556	0.46274	0.38131	0.31442	0.17187	0.99997	0.39971	0.2851	-0.11801	0.87904	0.52124	0.062215	0.27713	0.58701	0.51241	0.17026	0.15379	0.88049	0.72855	0.0088357	0.011748	0.99468	0.38527	0.54528	0.061881	0.99936	0.45049	0.47319	0.26273	0.65581
fgfr1 oncogene partner	contig01251	1.3464	0.0023354	-0.068444	0.96374	0.7446	0.088742	0.10931	0.99997	0.48181	0.30611	-0.30693	0.68624	1.0245	0.0032964	0.03405	0.97203	0.32296	0.59618	0.09448	0.95559	0.99923	0.0043188	0.47442	0.53066	-0.40924	0.65373	0.080584	0.99936	-0.77524	0.20706	0.48836	0.419
	contig01266	2.1351	0.25522	-0.3955	0.89899	1.8819	0.31455	0.6372	0.99997	2.7928	0.076935	-0.35701	0.89052	2.634	0.042481	-0.94218	0.57149	2.0548	0.2642	-0.65359	0.82633	2.344	0.090698	-0.25063	0.95581	0.58141	0.86911	0.34392	0.99936	0.99582	0.75562	0.062941	0.9861
#NAME?	contig01267	0.21373	0.67591	0.45012	0.5523	0.093788	0.862	0.23888	0.99997	0.58665	0.10478	0.17026	0.81629	0.92658	0.001823	0.28108	0.60743	0.42666	0.3201	0.14111	0.90386	0.8033	0.0063471	0.16556	0.87469	0.11583	0.93333	-0.24697	0.95761	-0.092784	0.96938	0.070499	0.93988
	contig01273	0.41414	0.5099	-0.024671	0.98783	1.0633	0.038056	-0.31494	0.99997	0.47546	0.41866	-0.23379	0.81642	0.32268	0.47255	-0.41348	0.57383	0.49687	0.4367	0.83627	0.27564	0.6964	0.087327	0.30092	0.81299	0.025398	0.99234	-0.071138	0.99936	0.38558	0.82118	0.025604	0.98719
cysteine-rich protein	contig01277	1.8957	7.6539e-05	0.14628	0.89745	0.73522	0.079196	-0.70302	0.47538	1.7462	7.5275e-05	-0.45752	0.46161	1.2363	0.00036205	-0.35659	0.55075	0.78322	0.063275	-0.44901	0.55524	1.2152	0.00055851	-0.65203	0.27953	-0.16267	0.91089	-0.60443	0.52643	0.65633	0.30282	-0.2934	0.6857
	contig01285	0.47756	0.48259	0.30666	0.82771	0.56069	0.36572	-0.39102	0.99997	0.81038	0.15059	-0.65905	0.41141	1.1864	0.0077126	-0.89636	0.2171	0.61921	0.3522	-0.79781	0.37061	1.05	0.01808	-0.37538	0.77356	-0.17979	0.93249	-0.46783	0.90188	-0.22758	0.94375	0.12584	0.92727
	contig01291	0.67676	0.14717	0.1491	0.90442	0.92751	0.041773	-0.0014416	0.99997	1.1839	0.005386	-0.21765	0.8062	1.5836	5.4153e-05	0.084596	0.93664	1.0963	0.01394	-0.10303	0.95227	1.3075	0.00057285	0.10189	0.9539	0.25393	0.84704	-0.16063	0.99936	0.34998	0.8158	0.0069533	0.9959
	contig01293	0.69677	0.28293	-0.29018	0.84914	0.76241	0.21404	-0.029924	0.99997	0.77731	0.20192	0.52814	0.57669	0.98879	0.034824	-0.23425	0.84034	1.1017	0.063662	-0.48861	0.69483	1.5828	0.0011564	0.030075	0.99151	1.1227	0.1531	0.12172	0.99936	0.35989	0.88277	0.62533	0.4545
	contig01297	2.1587	0.0061471	-0.12584	0.96241	1.4753	0.060941	-0.28101	0.99997	2.4271	0.0015916	-0.73008	0.55446	2.542	0.00013449	-1.0641	0.25299	2.201	0.0048292	-0.40101	0.85216	2.3643	0.00040242	-0.3731	0.86553	1.2878	0.24664	-0.27292	0.99936	1.7236	0.087577	-0.29503	0.85991
	contig01298	3.5024	0.0066748	-0.20108	0.96443	2.4506	0.058684	-0.32646	0.99997	3.745	0.0025832	-0.67048	0.78616	4.4344	7.0318e-05	-0.92921	0.63556	3.5465	0.0056913	-0.91949	0.75784	3.9805	0.00032419	-0.43889	0.91659	1.3143	0.67113	-0.437	0.99936	1.982	0.41729	-0.43331	0.87698
	contig01303	0.13295	0.75044	-0.016898	0.98582	0.062108	0.88266	-0.18368	0.99997	0.38686	0.17204	-0.098623	0.87177	0.63725	0.0042308	-0.14699	0.76577	0.58856	0.033015	-0.20912	0.73718	0.61845	0.0056098	-0.054648	0.9614	0.40634	0.33682	-0.21068	0.93292	-0.11756	0.94001	-0.10449	0.85991
	contig01309	-2.1181	0.015513	-0.50733	0.81708	-0.69552	0.50325	-0.57386	0.99997	-0.71541	0.50598	-0.82825	0.54788	-0.51628	0.51248	-1.0335	0.34991	-0.011074	0.99537	-0.63827	0.75134	0.12658	0.88721	-0.59267	0.77258	0.077152	0.98641	0.4399	0.99562	0.049763	0.99483	0.066337	0.98175
	contig01310	-2.009	0.023448	-0.55727	0.79435	-0.53419	0.63101	-0.72036	0.99093	-0.7467	0.48537	-0.86703	0.528	-0.47355	0.55702	-1.2167	0.24638	0.035254	0.98519	-0.82709	0.63992	0.10286	0.91113	-0.58609	0.77918	0.022691	0.99546	0.37031	0.99936	-0.13362	0.98359	0.018457	0.99464
	contig01316	-0.84581	0.097627	-0.37221	0.7458	-2.4274	3.3181e-05	-1.5606	0.016966	-0.90671	0.059603	-0.54028	0.4704	-1.0704	0.007212	-0.76056	0.18318	-1.117	0.024062	-0.82733	0.27327	-0.9949	0.012382	-0.28803	0.82125	-0.52591	0.58069	-0.2672	0.98846	-0.77648	0.31219	-0.38492	0.64414
	contig01327	0.47599	0.062763	0.15165	0.80845	0.5868	0.023982	0.0060652	0.99997	0.4106	0.099139	-0.13151	0.78759	0.66775	0.0012223	-0.19502	0.6047	0.16935	0.64444	-0.14588	0.82311	0.60013	0.0034516	0.098268	0.8991	-0.42538	0.23489	-0.080303	0.99936	0.0084801	0.99793	0.1026	0.84543
protein	contig01345	1.025	0.062881	0.41247	0.74357	0.97499	0.075175	0.84566	0.59782	1.2241	0.017392	0.64845	0.40776	1.806	0.00010987	0.43828	0.58286	1.2684	0.019201	0.37093	0.7777	1.7367	0.00024922	0.42685	0.714	-0.023443	0.99466	0.47814	0.88084	-0.22385	0.94374	0.30475	0.76834
	contig01346	0.78916	0.06286	0.161	0.88982	0.16573	0.77394	0.23627	0.99997	0.88566	0.026068	0.26129	0.73666	0.9975	0.0031818	0.048273	0.96004	0.82542	0.050401	0.22804	0.83991	1.0672	0.0019561	0.12408	0.9349	-0.3581	0.70583	0.26527	0.96632	-0.68887	0.26956	0.32674	0.64114
	contig01347	0.8144	0.12978	0.55539	0.61271	0.63504	0.25075	0.40219	0.99758	1.0625	0.032043	0.29212	0.76859	1.164	0.005289	-0.057533	0.96155	1.0214	0.051256	0.24585	0.86874	1.169	0.0053496	0.22521	0.88248	-0.37836	0.77419	0.047085	0.99936	-0.66483	0.48543	0.29246	0.76698
aaa atpase domain containing protein	contig01348	1.0105	0.063736	0.57415	0.61271	0.52386	0.38784	0.61874	0.85886	0.45823	0.48134	0.38894	0.6797	0.8414	0.051874	0.32708	0.71709	0.77119	0.1882	0.22182	0.89307	0.9478	0.027367	0.2653	0.8606	-0.68325	0.44956	0.06954	0.99936	-0.77459	0.38626	0.03516	0.98356
isoform b	contig01349	0.66484	0.35644	-0.090647	0.96749	0.70464	0.30284	0.31286	0.99997	1.5567	0.0088528	0.27993	0.8244	1.5299	0.0025968	-0.10254	0.94516	1.3135	0.035846	0.15635	0.94682	1.5668	0.0023319	0.32886	0.84646	-0.34547	0.85335	0.30788	0.99593	-0.82876	0.45786	0.70957	0.419
	contig01350	0.50698	0.4019	0.12337	0.93691	0.25391	0.70934	0.46511	0.96103	1.0497	0.032897	0.29497	0.76441	1.09	0.008349	-0.024089	0.98482	1.1764	0.022028	0.15472	0.93203	1.1365	0.0062777	0.26454	0.85144	-0.46572	0.68178	0.013077	0.99938	-0.44545	0.76232	0.46496	0.56518
	contig01357	-1.7671	0.029686	-0.59539	0.74885	-0.38867	0.71635	-0.71603	0.96512	-0.75646	0.42184	-0.87534	0.47088	-0.51038	0.47822	-0.8312	0.43992	0.009229	0.99603	-0.48221	0.81457	0.1142	0.88991	-0.68556	0.67707	-0.094623	0.9815	0.37599	0.99831	-0.12755	0.98222	0.060305	0.98175
	contig01366	-0.40677	0.43577	0.2659	0.80545	-1.0293	0.022675	-0.059158	0.99997	-0.081449	0.91565	-0.11742	0.90909	0.16579	0.69111	-0.26269	0.7208	0.23862	0.72602	0.13184	0.93159	0.058557	0.89653	-0.055571	0.97727	-0.3743	0.70558	-0.34162	0.92823	0.025619	0.99456	-0.20098	0.81896
endonuclease-reverse transcriptase	contig01387	0.26745	0.50876	0.20823	0.79181	0.3236	0.37424	-0.14432	0.99997	0.60052	0.055585	-0.097373	0.8967	0.84801	0.0013918	0.035355	0.96221	0.3564	0.36273	-0.19495	0.8137	0.67677	0.0094299	-0.12747	0.89793	0.007854	0.99568	-0.22172	0.95527	0.0028056	0.99945	0.090356	0.9053
endonuclease-reverse transcriptase	contig01388	0.27266	0.5931	-0.086975	0.94144	-0.071363	0.90582	-0.2917	0.99779	0.78043	0.034386	-0.29384	0.65786	0.55429	0.076511	-0.48174	0.31491	0.086427	0.90802	-0.38873	0.59919	0.34431	0.29296	-0.34595	0.65102	-0.51042	0.42024	-0.55945	0.53264	-0.42395	0.61332	-0.28718	0.66446
endonuclease-reverse transcriptase	contig01391	0.50139	0.1189	0.14432	0.8622	0.1519	0.7132	-0.22991	0.99779	0.63122	0.033997	-0.2825	0.57574	0.94327	0.00031202	0.052069	0.9444	0.45693	0.17618	-0.14094	0.87614	0.80851	0.0017227	-0.31796	0.5783	-0.089699	0.94057	-0.22315	0.94663	0.0025542	0.99945	-0.040507	0.96424
	contig01405	0.34882	0.83306	-0.68562	0.7765	0.22318	0.89827	0.096939	0.99997	0.15232	0.93164	0.47932	0.81123	2.1185	0.0086092	-0.33717	0.87471	0.74323	0.60199	0.2198	0.95559	0.44533	0.63429	-0.33737	0.91974	-0.096087	0.98493	0.11101	0.99936	-0.086771	0.99122	-0.14318	0.95974
prostaglandin d2 hematopoietic-like	contig01424	0.55345	0.23124	-0.066348	0.96532	0.16458	0.78061	-0.41033	0.93501	0.1842	0.77464	-0.87494	0.10544	0.4063	0.25948	-1.0232	0.022416	0.11803	0.88029	-0.63868	0.34541	0.39576	0.2712	-0.51726	0.47114	-0.25649	0.83747	-0.442	0.79092	0.01608	0.99739	-0.33935	0.63174
prostaglandin d2 hematopoietic-like	contig01426	0.88306	0.21902	-0.64865	0.65367	0.22987	0.80895	-0.4658	0.99997	1.1505	0.077609	-0.070745	0.96822	1.0994	0.040194	-1.1123	0.1367	0.51147	0.58496	-0.43726	0.78971	1.1397	0.032789	-0.66476	0.59338	-0.7208	0.56918	-0.3595	0.98795	-0.17608	0.96809	-0.42275	0.72947
ahnak nucleoprotein	contig01430	0.83161	0.1189	0.31945	0.80115	-0.0020593	0.99814	0.41841	0.99416	0.2298	0.766	0.14427	0.9046	0.29706	0.52744	0.038414	0.97418	0.26946	0.74244	0.11503	0.95407	0.72397	0.083379	0.4545	0.66025	-1.3665	0.033959	0.38449	0.93674	-1.5115	0.0098187	0.30332	0.7532
reverse transcriptase family member	contig01442	0.096717	0.85022	0.31804	0.62203	0.37456	0.24668	-0.072803	0.99997	0.35805	0.27295	0.042377	0.95702	0.77697	0.0017086	0.20515	0.67322	0.28847	0.4618	0.010109	0.99215	0.83788	0.0009905	0.012914	0.99222	0.13321	0.89494	-0.021355	0.99936	0.30897	0.66303	0.28607	0.53899
	contig01444	1.354	0.015513	-0.094276	0.95984	0.70491	0.23214	0.11778	0.99997	1.0094	0.062035	-0.18333	0.88456	1.6026	0.00053646	0.028492	0.98344	1.0061	0.078996	-0.078944	0.97356	1.5833	0.00074913	-0.056734	0.98287	0.75059	0.40699	0.067813	0.99936	0.90485	0.28104	0.47022	0.60306
mediator complex subunit 11 cg6884-pa	contig01445	0.50827	0.20981	0.40661	0.61153	0.25064	0.58965	0.27514	0.99997	0.32205	0.48212	0.19238	0.79517	0.51072	0.096333	0.32304	0.55452	0.38804	0.411	0.66277	0.23435	0.61892	0.040888	0.45998	0.46784	0.10906	0.94035	0.04701	0.99936	-0.22057	0.89578	0.36044	0.53127
las1-like ( cerevisiae)	contig01457	-0.05643	0.93667	0.36282	0.64316	0.18616	0.69665	0.20655	0.99997	0.026687	0.96915	0.26603	0.67527	0.44582	0.13557	0.51901	0.22634	0.10954	0.86838	0.22208	0.80771	0.60616	0.037659	0.33973	0.63094	-0.026632	0.98942	0.068959	0.99936	0.047442	0.98663	0.57293	0.20901
	contig01465	0.39659	0.28358	0.40661	0.55731	0.945	0.0087684	0.089018	0.99997	0.63438	0.047938	0.10791	0.88683	0.63242	0.017517	0.37486	0.384	0.55687	0.10833	0.45248	0.41021	0.6606	0.013223	0.27631	0.68808	0.13158	0.9102	0.38586	0.71051	0.057661	0.98052	0.40341	0.37631
	contig01467	0.30972	0.50941	0.27822	0.74885	0.64405	0.091412	-0.011473	0.99997	0.59223	0.11387	0.025942	0.98	1.0428	0.00078116	0.30202	0.58515	0.50289	0.23304	0.12245	0.92474	1.074	0.00071888	0.068653	0.96418	0.16245	0.89771	-0.04175	0.99936	-0.15279	0.94375	0.25781	0.69939
	contig01472	0.42639	0.13149	0.27076	0.64461	0.44882	0.10439	-0.037775	0.99997	0.30733	0.30101	-0.094154	0.87671	0.63214	0.0040948	0.025476	0.96845	0.15307	0.71663	-0.040889	0.97143	0.67491	0.0025513	0.021512	0.98601	-0.26408	0.64032	-0.0065983	0.99954	-0.21051	0.81943	0.13273	0.80621
receptor-type tyrosine-protein phosphatase kappa	contig01474	0.25932	0.38385	0.23304	0.68235	0.43301	0.094442	0.18168	0.99997	0.31492	0.24664	0.34517	0.33006	0.66402	0.0014732	0.4411	0.12005	0.38001	0.16792	0.26907	0.57375	0.64893	0.0020477	0.26536	0.56767	0.066703	0.94648	0.17319	0.95693	-0.089678	0.95444	0.29802	0.40084
atp synthase beta subunit	contig01486	-0.0038296	0.99799	-0.5919	0.67825	-0.11255	0.91191	-0.31698	0.99997	-0.10669	0.9245	-0.91765	0.2951	0.14988	0.81598	-1.8991	0.0044512	-0.00056084	0.9996	-0.024036	0.99148	0.38822	0.4985	-0.51162	0.70806	-0.18	0.94248	-0.31392	0.99593	-0.1535	0.97087	-0.71474	0.42907
	contig01488	-0.014272	0.99221	-0.017427	0.99389	0.26324	0.75417	0.22947	0.99997	1.2192	0.03789	0.10486	0.94559	1.3583	0.0059166	-0.094962	0.94816	1.2929	0.035237	0.1428	0.95212	1.4134	0.0045601	0.18063	0.93551	0.23136	0.91684	-0.065776	0.99936	-0.081734	0.9861	0.22293	0.86582
	contig01492	-0.028043	0.98285	-0.10349	0.96037	-0.078391	0.93957	-0.47775	0.99758	0.35392	0.68182	-0.60178	0.53501	0.9856	0.048	-0.86944	0.23627	0.19625	0.8604	-0.62527	0.59834	0.33739	0.54726	-0.66878	0.54177	0.6702	0.56786	-0.85589	0.57308	1.0897	0.22246	-0.69675	0.42177
peptidylglycine alpha-hydroxylating monooxygenase	contig01493	1.2923	0.0116	0.77232	0.44881	1.5162	0.0070781	0.49712	0.92996	1.6895	0.00096495	0.23753	0.81629	2.1049	9.9059e-06	0.27774	0.75865	1.6366	0.001589	0.10174	0.96031	1.9784	3.8841e-05	0.41021	0.70434	0.037982	0.98942	0.035718	0.99936	0.15312	0.96379	-0.034307	0.98311
endonuclease-reverse transcriptase	contig01498	-0.021517	0.9763	-0.31798	0.67902	0.17054	0.70858	-0.59768	0.45506	0.24249	0.59077	-0.27917	0.62987	0.47277	0.092191	-0.37187	0.41271	0.22214	0.66283	-0.35876	0.58281	0.56925	0.039728	0.010062	0.99548	-0.24488	0.78323	-0.39121	0.73108	0.20648	0.89065	-0.36338	0.46833
	contig01517	0.1634	0.57322	0.27905	0.54073	0.21188	0.40184	-0.014301	0.99997	0.34731	0.11741	0.082395	0.86533	0.55576	0.0021154	0.38275	0.12096	0.139	0.67455	0.093307	0.89162	0.53604	0.0031178	0.1641	0.7403	0.012737	0.99171	-0.031397	0.99936	0.022931	0.98889	0.22968	0.48016
	contig01520	0.2464	0.34168	0.23363	0.62728	0.23719	0.34651	-0.095669	0.99997	0.3904	0.078721	0.039928	0.94398	0.66199	0.00046159	0.29544	0.28498	0.15188	0.64656	0.077665	0.91858	0.6335	0.00088778	0.057034	0.94727	0.051734	0.95791	0.02745	0.99936	0.063448	0.96616	0.28926	0.3423
	contig01522	0.2681	0.36523	0.098943	0.88925	0.39142	0.13457	-0.017543	0.99997	0.18852	0.56487	-0.13328	0.78809	0.52075	0.01102	0.062735	0.91335	0.15099	0.69803	-0.013833	0.98808	0.45875	0.024999	0.048241	0.96338	-0.22879	0.68727	-0.078171	0.99936	0.098887	0.94686	0.31721	0.36042
	contig01523	0.031028	0.97504	0.51373	0.61122	-0.081247	0.91365	-0.11559	0.99997	0.8798	0.056692	0.10332	0.92898	1.1422	0.0031005	-0.22261	0.80486	1.0279	0.030994	0.4898	0.59007	1.3342	0.00086951	0.42916	0.64888	-0.55524	0.51641	-0.045048	0.99936	0.18876	0.94569	0.36419	0.65291
	contig01525	0.87036	0.041191	-0.12531	0.91804	0.16706	0.77403	-0.37291	0.96712	0.72779	0.077192	-0.82162	0.12669	0.71163	0.035322	-1.473	0.00099588	0.43496	0.40799	-0.74719	0.2263	0.84677	0.01221	-0.64196	0.30305	-0.8837	0.10809	-0.38407	0.8672	-0.48331	0.5759	-0.51191	0.37513
hypothetical protein TcasGA2_TC000033 [Tribolium castaneum]	contig01529	0.80909	0.015541	0.2465	0.74885	0.69346	0.041236	0.35947	0.89663	0.92697	0.0038281	0.30439	0.57095	1.4275	6.8798e-06	0.60741	0.096512	0.85232	0.010185	0.42662	0.44828	1.2923	3.8502e-05	0.45373	0.39485	0.21375	0.81929	0.22161	0.95964	0.4243	0.49112	0.64439	0.10267
	contig01537	1.3097	0.019156	0.25169	0.89213	0.14701	0.85718	0.36357	0.99997	0.49554	0.45171	-0.31186	0.79735	-0.038149	0.95032	-0.53761	0.59107	-0.22848	0.80619	-0.20723	0.92091	0.46159	0.32837	0.27992	0.87472	0.18987	0.92589	0.10569	0.99936	0.54394	0.68547	-0.85402	0.21841
	contig01539	0.58769	0.53894	0.34334	0.84351	0.51573	0.69588	0.6948	0.91044	0.99836	0.2574	0.0033458	0.99834	1.5833	0.0088599	0.21911	0.87889	0.46035	0.68179	0.5981	0.66732	0.95023	0.12125	0.41123	0.80689	1.1227	0.24343	-0.30301	0.99936	0.82451	0.51644	-0.42357	0.73038
na	contig01542	-0.33862	0.57613	0.0508	0.97563	0.37327	0.49807	-0.0077658	0.99997	0.49365	0.338	-0.059707	0.96048	0.72971	0.050744	-0.088913	0.93556	0.47091	0.41757	0.056706	0.97704	0.81374	0.028176	0.14499	0.92916	0.19156	0.90544	0.00040628	0.99997	-0.46565	0.67259	0.098356	0.9321
	contig01544	0.21797	0.7162	0.068787	0.96039	0.29936	0.5497	0.099455	0.99997	0.60003	0.15243	-0.022654	0.9841	0.77107	0.019303	0.38951	0.49433	0.36267	0.50929	0.0034792	0.99801	0.90353	0.0065249	0.16881	0.89285	-0.32531	0.74184	0.2734	0.95964	-0.73288	0.21375	0.33502	0.62115
hypothetical protein FG06424.1 [Gibberella zeae PH-1]	contig01545	0.55779	0.45585	-0.18088	0.91945	0.45206	0.5486	0.26322	0.99997	0.98197	0.11176	-0.047484	0.97765	1.0652	0.032176	-0.33484	0.76104	0.9037	0.18016	-0.20202	0.92487	1.4121	0.0049771	0.024464	0.99338	0.18493	0.93794	0.092102	0.99936	-0.1409	0.97192	0.16608	0.90924
	contig01552	0.12892	0.81868	0.10176	0.91886	0.46812	0.195	-0.15864	0.99997	0.22824	0.62144	-0.098882	0.90282	0.49189	0.08022	-0.20796	0.72236	0.13825	0.81443	0.18561	0.84499	0.58984	0.033644	-0.16352	0.86718	0.030503	0.98641	-0.18537	0.98858	0.059478	0.98052	-0.21513	0.73544
tumor protein d52-like 2	contig01554	1.1341	0.0079951	0.37698	0.69393	1.039	0.018704	0.17772	0.99997	0.96197	0.017006	-0.10547	0.91717	1.4911	6.1322e-05	-0.072742	0.9431	0.92966	0.028166	0.33651	0.71746	1.618	4.76e-05	0.15237	0.91133	-0.35439	0.72049	0.067216	0.99936	-0.24064	0.9026	0.31069	0.6728
glutamine synthetase iii	contig01557	-0.16461	0.70621	0.05375	0.95726	0.33423	0.31465	-0.35935	0.84528	0.33308	0.31839	-0.40049	0.34413	0.79093	0.0014331	0.076138	0.91148	0.39549	0.24998	-0.074487	0.94811	0.56774	0.019419	-0.17515	0.82308	0.020401	0.99008	-0.44258	0.52643	-0.10604	0.95444	-0.076763	0.91633
	contig01568	0.65388	0.039375	0.20908	0.7827	0.56798	0.072554	-0.068819	0.99997	0.64432	0.031502	-0.12739	0.8478	1.146	3.7574e-05	-0.032521	0.96425	0.61901	0.050481	-0.15768	0.85809	1.1834	5.199e-05	0.0015557	0.99927	-0.32376	0.59811	-0.12299	0.99936	0.059064	0.97851	0.25223	0.62571
	contig01579	1.3879	0.1589	0.28109	0.91778	0.64071	0.57718	0.26999	0.99997	1.9977	0.025306	0.010591	0.99691	2.5083	0.0011171	-0.058955	0.9788	1.6906	0.079575	-0.24354	0.94319	2.0581	0.0064974	0.16616	0.96543	0.49129	0.86301	-0.34947	0.99936	1.2989	0.41817	0.1586	0.94973
	contig01593	1.0766	0.34923	0.48738	0.8316	0.37256	0.76258	0.20515	0.99997	1.3022	0.1547	0.37547	0.84039	2.1775	0.0028391	0.14056	0.94769	0.59229	0.65228	0.0056327	0.99839	0.86657	0.25045	0.57865	0.79047	0.43435	0.89759	-0.17897	0.99936	-0.04622	0.99627	-0.62037	0.69589
	contig01596	1.0784	0.076245	0.22869	0.89017	0.69554	0.28043	0.40712	0.99997	1.595	0.005093	-0.23999	0.84979	1.7307	0.00049432	0.080592	0.95365	1.3529	0.023125	-0.033679	0.98777	1.4531	0.0029089	0.19998	0.92014	0.73129	0.4798	-0.46003	0.93137	0.47626	0.80717	-0.30655	0.79287
	contig01609	0.42074	0.33881	0.27593	0.76227	0.59982	0.12785	0.80634	0.26603	0.85613	0.019546	0.84497	0.083042	0.99554	0.0015798	0.81971	0.045494	0.67804	0.089433	0.78841	0.14128	0.85736	0.0059338	0.98092	0.040686	0.84639	0.08481	0.76395	0.23672	-0.24634	0.87225	0.79448	0.077282
profilin	contig01618	0.97465	0.030468	0.74832	0.37003	0.78322	0.082655	0.7472	0.49515	0.71039	0.10833	0.39608	0.58505	1.0476	0.0036206	0.5446	0.32803	0.75885	0.10113	0.52198	0.50896	1.0214	0.0047235	0.62948	0.36394	0.14595	0.93058	0.31062	0.95049	0.28537	0.87143	0.71876	0.19526
	contig01619	1.7341	0.0083099	0.9803	0.45541	0.99854	0.13577	0.66888	0.91194	1.2703	0.043236	0.68793	0.49032	1.3498	0.010039	0.14368	0.92499	1.0949	0.1085	0.25067	0.90609	1.3942	0.0081254	0.75331	0.50449	0.30093	0.88653	-0.36227	0.98563	-0.088986	0.9861	-0.045952	0.98242
	contig01632	0.43856	0.1432	0.3101	0.61064	0.48534	0.095837	0.17155	0.99997	0.4159	0.15608	0.14614	0.79578	0.50851	0.027314	0.10958	0.8502	0.2371	0.54615	0.10907	0.90678	0.60673	0.0087082	0.32398	0.51454	-0.52125	0.18722	0.14354	0.99573	-0.19088	0.85966	0.47649	0.17948
ran binding protein 10	contig01649	0.38391	0.77806	0.91391	0.58194	1.2858	0.10829	0.4943	0.99997	1.0611	0.19554	0.47415	0.74859	2.03	0.0016497	0.77894	0.47034	1.2976	0.11638	0.21009	0.94239	1.5017	0.01755	0.65934	0.6858	0.82182	0.59374	-0.3681	0.99831	0.33612	0.94001	0.35095	0.82771
	contig01667	0.48876	0.091358	0.58443	0.22219	0.63407	0.028182	0.39193	0.71815	0.55397	0.040406	0.41881	0.27166	0.98088	6.7586e-05	0.47862	0.12826	0.32855	0.32338	0.36185	0.44725	1.0335	6.8626e-05	0.44855	0.27351	0.02102	0.98942	0.01071	0.99936	-0.16313	0.89812	0.38173	0.30176
	contig01669	1.7949	0.038909	-1.0176	0.5712	1.0829	0.23374	-0.89048	0.90937	0.61052	0.58351	-0.81728	0.54559	0.78029	0.28393	-0.51127	0.72426	0.069999	0.97004	-1.1986	0.38906	1.0309	0.14276	-0.82882	0.61176	0.092023	0.98297	0.55442	0.97904	-0.46244	0.91	0.45681	0.81163
cystatin precursor	contig01684	0.70199	0.080634	-0.074001	0.95436	0.42217	0.33071	-0.41071	0.90719	0.85349	0.022692	-0.56957	0.28655	0.89687	0.0046478	-0.46955	0.34496	0.41168	0.3981	-0.374	0.63276	0.89708	0.0049129	-0.36875	0.62822	-0.34883	0.69206	-0.089738	0.99936	-0.24381	0.88122	0.088643	0.92775
armadillo repeat-containing	contig01687	0.59746	0.079352	0.48016	0.47049	0.5787	0.087395	0.052563	0.99997	0.67427	0.034358	0.45608	0.32203	1.2664	2.4607e-05	0.49335	0.2036	0.54209	0.12185	0.29327	0.67446	1.0909	0.00020443	0.471	0.36451	-0.067126	0.96473	0.23766	0.94889	-0.10986	0.95792	0.4374	0.32262
chromosome 6 open reading frame 150	contig01688	1.046	0.080634	0.003336	0.998	0.79932	0.18958	-0.11372	0.99997	0.50032	0.48134	-0.17805	0.89512	0.83812	0.077529	-0.21517	0.85834	1.3288	0.023102	-0.3626	0.80437	0.87174	0.064907	-0.36709	0.79906	0.078547	0.97948	0.039706	0.99936	0.19095	0.95792	-0.0087435	0.99608
	contig01698	0.93068	0.093044	0.3501	0.79053	0.99206	0.068658	0.089067	0.99997	0.97003	0.064372	0.308	0.76484	1.4248	0.0012679	-0.29035	0.76215	0.78769	0.17899	0.23214	0.88646	1.3895	0.0018328	0.030507	0.99064	0.26311	0.8771	-0.12735	0.99936	0.053368	0.98935	0.15779	0.89908
proactivator polypeptide precursor	contig01702	0.93643	0.0070949	0.30643	0.6937	0.71288	0.042503	0.14266	0.99997	1.2277	0.00045604	0.23078	0.7117	1.6305	1.7866e-06	0.45962	0.26932	1.3524	0.00013209	0.49835	0.36784	1.5556	6.2518e-06	0.47631	0.38319	0.47274	0.39596	0.21447	0.97082	0.13854	0.94427	0.50995	0.24417
	contig01703	0.47764	0.10756	0.3756	0.52005	0.72918	0.015566	0.098794	0.99997	0.59107	0.031929	0.14642	0.7958	0.79452	0.00083048	0.38692	0.26477	0.43388	0.16128	0.27041	0.64056	0.8089	0.00084997	0.26414	0.64008	0.17279	0.83768	0.020664	0.99936	0.15642	0.90935	0.32464	0.42158
	contig01704	0.30648	0.36775	0.25056	0.70873	0.54867	0.06454	-0.064867	0.99997	0.49543	0.085841	0.086034	0.89969	0.75387	0.0016512	0.22123	0.61799	0.39439	0.2307	0.07498	0.94488	0.76367	0.0016865	0.11821	0.89356	0.036026	0.98077	-0.13829	0.99831	0.24406	0.78633	0.17568	0.74753
	contig01705	0.67448	0.058771	0.36869	0.62049	0.39576	0.30152	-0.022677	0.99997	0.42283	0.26136	-0.018671	0.98436	0.95281	0.00096981	0.62236	0.10822	0.50587	0.18642	0.1943	0.83658	1.0241	0.0005873	0.068163	0.9625	0.33586	0.64745	0.1591	0.99936	0.42015	0.54021	0.84805	0.035616
	contig01707	-0.09894	0.86554	0.26803	0.73472	0.17952	0.6866	-0.030073	0.99997	0.26882	0.52787	-0.13254	0.85728	0.61625	0.023911	0.040656	0.9587	0.16818	0.76098	0.10653	0.92839	0.68247	0.012476	-0.097707	0.93779	0.10946	0.9329	-0.32174	0.84923	-0.021537	0.99396	-0.019164	0.98601
	contig01713	0.57243	0.14105	0.43375	0.58144	0.46986	0.236	0.26416	0.99997	0.56	0.13838	0.17124	0.81998	0.71993	0.016192	0.34911	0.50248	0.51526	0.21414	0.26319	0.76627	0.96159	0.0018576	0.33898	0.64462	-0.16316	0.8962	0.42191	0.73376	-0.54584	0.3777	0.47021	0.35116
exocyst complex component 4	contig01724	0.092551	0.86058	0.29678	0.65809	0.76029	0.01775	0.031644	0.99997	0.7722	0.0082451	0.098006	0.88963	1.07	6.767e-05	0.025468	0.97102	0.64887	0.035069	0.20792	0.782	0.9572	0.00032411	0.27945	0.64415	0.2193	0.78274	0.015548	0.99936	0.61116	0.14085	0.23891	0.64394
exocyst complex component 4	contig01725	0.30437	0.39709	0.53472	0.33706	0.4923	0.11507	0.36005	0.85146	0.50408	0.096325	0.095994	0.89155	0.59278	0.015901	0.29086	0.4935	0.73297	0.01674	0.32067	0.57972	0.55887	0.02293	0.30336	0.59828	0.17458	0.84697	-0.082284	0.99936	0.23635	0.82008	0.088391	0.9008
dihydrolipoamide dehydrogenase	contig01727	0.19557	0.63652	0.22504	0.74914	0.40698	0.1999	0.059102	0.99997	0.31945	0.34791	-0.19813	0.72178	0.59317	0.01491	-0.10075	0.87711	0.1003	0.8541	-0.14491	0.86812	0.6105	0.012349	-0.05242	0.96704	-0.25929	0.7094	-0.16366	0.98855	-0.089802	0.96455	0.2495	0.61715
heat shock cognate 71 kda	contig01735	0.41699	0.2087	0.17209	0.82727	0.72884	0.022757	0.33617	0.89095	0.66991	0.023045	-0.051545	0.94712	0.91336	0.00040585	0.047943	0.9481	0.60636	0.052421	0.12245	0.89985	0.89091	0.00066694	0.14339	0.87103	0.10135	0.93055	0.054718	0.99936	0.30672	0.6822	0.28982	0.54279
	contig01737	0.52987	0.1234	-0.28685	0.70536	0.44313	0.20236	-0.39876	0.84031	0.28668	0.47654	-0.64774	0.12694	0.24928	0.39016	-0.76637	0.029001	-0.16226	0.76417	-0.65969	0.15023	0.14051	0.65249	-0.63932	0.14972	-0.8374	0.047299	-0.3239	0.83174	-0.76908	0.068588	-0.14957	0.82479
	contig01738	0.76922	0.03325	0.63616	0.32598	0.50805	0.17001	0.55907	0.59554	0.36195	0.37393	0.65222	0.15575	0.78794	0.0061659	0.58325	0.15	0.47415	0.23958	0.6829	0.17459	0.76823	0.0077136	0.68773	0.14977	-0.30856	0.70321	0.14768	0.99936	-0.060705	0.9806	0.44704	0.3556
	contig01741	0.49645	0.15194	0.46152	0.49053	0.36427	0.31481	0.27607	0.9876	0.30896	0.42599	0.56054	0.1957	0.59979	0.023569	0.33446	0.45455	0.41315	0.27698	0.28794	0.67633	0.66766	0.011906	0.63479	0.15087	-0.29605	0.68727	0.10515	0.99936	-0.1758	0.91268	0.47567	0.26121
orf2-encoded protein	contig01752	0.73147	0.035395	0.45766	0.51481	0.47043	0.18851	0.072135	0.99997	0.6301	0.059055	0.15616	0.82156	0.90877	0.0012679	-0.041835	0.95863	0.48235	0.20317	0.13005	0.907	0.85021	0.0025803	0.13969	0.89356	-0.46176	0.41038	-0.16874	0.99593	-0.096371	0.96616	0.13544	0.85188
orf2-encoded protein	contig01753	0.20118	0.58192	0.19117	0.77502	0.42916	0.13148	-0.005776	0.99997	0.42111	0.13338	-0.059376	0.9297	0.8065	0.00049808	0.19866	0.64611	0.31985	0.33201	0.022743	0.98441	0.8759	0.00029013	0.052065	0.96338	0.020782	0.98942	0.022905	0.99936	0.060358	0.97433	0.27575	0.50873
	contig01757	0.3753	0.29319	0.19563	0.80427	0.51575	0.11234	0.072517	0.99997	0.42592	0.20134	0.11398	0.87213	0.64971	0.011156	-0.098117	0.88829	0.17754	0.72031	-0.016448	0.98867	0.60776	0.017566	0.015145	0.99196	-0.18399	0.84363	-0.1529	0.99767	-0.13944	0.93738	0.23592	0.66791
	contig01761	0.51652	0.10448	0.17327	0.82632	0.42449	0.18662	-0.11171	0.99997	0.48733	0.11374	0.25085	0.62735	0.85259	0.00082837	0.15676	0.77994	0.36924	0.30522	0.014631	0.98948	0.73984	0.0033213	0.090047	0.93623	0.08918	0.94035	-0.19844	0.96604	0.18497	0.89065	0.12085	0.85368
beta tubulin	contig01764	0.80971	0.0084264	0.020319	0.98466	0.70076	0.025898	-0.34958	0.86253	0.58896	0.045358	-0.5599	0.15346	0.89158	0.00046794	-0.38399	0.31034	0.27311	0.50128	-0.53013	0.24371	0.95924	0.00030153	-0.42385	0.38099	-0.1981	0.81641	-0.21343	0.95049	0.042289	0.9861	0.22076	0.67844
PREDICTED: similar to predicted protein [Hydra magnipapillata]	contig01773	1.1443	0.040226	0.65074	0.57374	1.0755	0.053972	0.15195	0.99997	1.3303	0.010861	0.36859	0.71153	1.7807	0.00015055	0.23778	0.824	1.629	0.0034078	0.42453	0.72972	1.6775	0.00039097	0.34929	0.79541	-0.073188	0.97965	0.0054863	0.99997	0.16277	0.9644	0.051092	0.97579
PREDICTED: similar to predicted protein [Hydra magnipapillata]	contig01776	0.60451	0.11014	0.49041	0.51283	0.3308	0.43623	0.3432	0.94524	0.76989	0.028112	-0.0055467	0.99601	0.83843	0.0046242	0.35674	0.47988	0.64598	0.089336	0.43865	0.49666	0.58574	0.047112	0.31188	0.67783	0.30397	0.72284	0.38317	0.78595	0.15057	0.94375	0.12099	0.88159
protein	contig01779	0.67851	0.1358	0.28765	0.7878	0.90136	0.043455	-0.10114	0.99997	0.40529	0.43246	-0.12891	0.89943	0.94086	0.0074909	0.46565	0.42114	0.71739	0.11811	0.28422	0.79217	0.80132	0.022297	-0.13293	0.93347	0.084859	0.96589	0.029953	0.99936	-0.042114	0.9899	0.081867	0.94296
	contig01787	-0.32789	0.58974	0.062277	0.97023	0.29602	0.60625	0.020734	0.99997	0.5207	0.29943	-0.049085	0.96818	0.82589	0.025365	0.038962	0.97054	0.59705	0.25418	0.3943	0.68364	0.97786	0.0084156	0.13914	0.93383	0.25855	0.85072	-0.23879	0.99266	-0.21271	0.93181	-0.022084	0.98749
	contig01789	0.22569	0.34369	0.32663	0.4209	0.21846	0.345	0.18271	0.97033	0.24028	0.2867	0.16609	0.63716	0.40153	0.016138	0.33534	0.15693	0.14323	0.63459	0.24486	0.50658	0.53577	0.0018647	0.36047	0.21335	-0.21923	0.58716	0.042383	0.99936	-0.20695	0.68134	0.37863	0.1306
	contig01790	-0.32205	0.57696	0.0060505	0.99636	0.40072	0.43115	0.21374	0.99997	0.17677	0.79219	0.31814	0.6811	0.50993	0.16204	0.25817	0.73251	0.44333	0.42603	0.42073	0.63018	0.81721	0.020643	0.3587	0.69751	-0.027447	0.99095	0.036487	0.99936	-0.12943	0.96522	0.44489	0.49769
26s protease regulatory subunit 4	contig01794	0.26683	0.28942	0.31567	0.49053	0.23822	0.34091	0.0073682	0.99997	0.38416	0.082908	0.095181	0.83882	0.55149	0.0026061	0.33494	0.20189	0.29171	0.2554	0.26424	0.50896	0.58732	0.0016872	0.18818	0.68655	-0.20216	0.68715	0.22306	0.82241	-0.087758	0.94649	0.51443	0.048598
beta-tubulin	contig01798	-0.45132	0.57843	0.25722	0.87932	0.11211	0.9081	-0.37105	0.99997	0.48977	0.52758	-0.62815	0.51168	0.90136	0.072731	-1.3662	0.037767	0.54761	0.50814	-0.43681	0.76605	0.82991	0.099374	-0.42944	0.76448	0.21206	0.92598	-0.71334	0.71673	-0.33432	0.91	-0.6603	0.45947
methionine synthase	contig01812	0.068172	0.9396	0.77495	0.36256	0.8929	0.054745	0.23002	0.99997	0.84992	0.055414	0.21116	0.81879	1.838	1.316e-05	0.69601	0.18881	1.4011	0.0025505	0.90647	0.15239	1.5491	0.00015167	0.66509	0.33946	1.0306	0.077852	0.21666	0.99831	0.93653	0.12546	0.587	0.33883
methionine synthase	contig01813	0.4271	0.33725	0.5598	0.4757	0.84456	0.03397	0.32869	0.98338	0.35575	0.44236	0.48009	0.38861	1.1904	0.00029128	0.90049	0.029001	0.76067	0.054579	0.92868	0.073246	1.0162	0.0016916	0.75374	0.14844	0.36713	0.65996	0.62815	0.4358	0.84086	0.097203	1.1069	0.013801
5-methyltetrahydrofolate-homocysteine methyltransferase	contig01815	0.19948	0.80518	0.60678	0.56721	0.93311	0.067781	0.42886	0.98115	0.96213	0.048445	0.30403	0.7485	1.8473	3.7851e-05	0.64788	0.29566	1.6896	0.00096703	1.0722	0.12466	1.8724	6.3595e-05	0.71843	0.35922	1.0677	0.10576	0.55397	0.74946	1.1461	0.078233	0.9492	0.11523
5-methyltetrahydrofolate-homocysteine methyltransferase	contig01816	0.050826	0.9682	0.63213	0.62965	0.58807	0.40282	0.36805	0.99997	0.49498	0.51986	0.32052	0.78947	1.3945	0.0050694	0.5307	0.55216	1.3809	0.025071	0.95738	0.31731	1.2348	0.01271	0.63473	0.57469	0.41704	0.80432	0.36226	0.97852	0.49671	0.80373	0.70073	0.41892
	contig01818	0.16102	0.76486	-0.13381	0.89099	-0.1726	0.71121	-0.61007	0.45506	0.30506	0.47387	-0.62482	0.16886	0.42958	0.13751	-0.74898	0.045433	0.11806	0.85128	-0.66417	0.182	0.23049	0.45924	-0.52395	0.31993	-0.51657	0.33947	-1.1124	0.02756	0.046955	0.9861	-0.22474	0.7265
ectonucleotide pyrophosphatase phosphodiesterase 6	contig01825	0.44249	0.44786	0.37573	0.73921	0.26264	0.67562	-0.040143	0.99997	0.63664	0.20976	0.78172	0.22152	0.84276	0.030073	0.17794	0.85836	0.37666	0.57777	0.008719	0.99646	0.62433	0.11382	0.23228	0.8661	-0.1791	0.91845	0.24399	0.99573	0.095838	0.97664	0.15512	0.88604
	contig01827	0.2087	0.7251	0.3054	0.74367	0.078719	0.90045	0.21818	0.99997	0.8411	0.029255	-0.32199	0.6369	0.90207	0.0055018	-0.22435	0.75275	0.89732	0.026022	-0.38439	0.63167	0.91698	0.00507	-0.051172	0.97755	0.099883	0.95128	-0.59451	0.51741	0.1388	0.95518	-0.45639	0.42047
	contig01830	0.67513	0.19108	0.3388	0.76978	-0.012953	0.98797	0.50679	0.90638	0.70546	0.15297	-0.01404	0.99196	0.90173	0.02009	0.14524	0.89223	0.53709	0.35787	-0.13149	0.94094	0.95534	0.013903	0.17451	0.91131	-0.046499	0.98493	0.076689	0.99936	0.28421	0.89471	0.46333	0.53007
oocyte zinc finger protein - partial	contig01832	0.48305	0.16371	0.040525	0.97301	0.48596	0.15122	-0.11292	0.99997	0.23688	0.57799	-0.3437	0.49428	0.54826	0.038276	-0.63224	0.075502	0.22936	0.629	-0.45717	0.39481	0.61218	0.02021	0.06956	0.95867	-0.23067	0.78839	-0.0095706	0.99936	-0.18824	0.90001	0.24832	0.65804
	contig01842	0.5617	0.22715	0.46068	0.61271	0.71582	0.10059	0.43902	0.91194	0.43734	0.37031	0.34437	0.63514	1.0371	0.0029392	0.50485	0.35609	0.48189	0.35008	0.23052	0.84488	1.0428	0.0030026	0.35142	0.69563	0.1907	0.89265	0.30632	0.94889	0.37849	0.7541	0.69472	0.19485
proteasome subunit alpha type-7	contig01859	1.3466	0.0028789	0.33139	0.74575	0.81276	0.068412	-0.074688	0.99997	1.1503	0.0061593	-0.25371	0.76365	1.5885	4.5369e-05	-0.27118	0.71369	0.7865	0.084125	-0.12489	0.93841	1.5918	7.8853e-05	-0.248	0.83032	-0.82083	0.17115	0.086728	0.99936	-0.19953	0.93502	0.79646	0.13398
	contig01871	0.45465	0.14411	0.43693	0.46128	0.82379	0.010037	0.37901	0.79841	0.42861	0.16028	0.36417	0.39333	0.76703	0.001651	0.61486	0.05377	0.18843	0.67057	0.44376	0.35171	0.74876	0.0022966	0.53111	0.2	0.030304	0.98381	0.38646	0.62254	0.22993	0.82008	0.83849	0.014804
thap domain-containing protein 2	contig01873	-0.34018	0.43775	0.11047	0.91735	0.15179	0.76334	0.11409	0.99997	0.32197	0.46388	-0.086324	0.92085	0.60147	0.040898	0.35361	0.48295	0.27155	0.60076	0.011867	0.99246	0.60215	0.040105	0.016203	0.99208	0.2207	0.83673	0.24438	0.95964	0.050565	0.9861	0.50081	0.2948
protein	contig01874	0.375	0.39583	0.3488	0.67684	0.52577	0.17852	0.098843	0.99997	0.4811	0.22729	0.19359	0.79396	0.60858	0.045213	-0.0070876	0.99454	0.17229	0.78222	0.09241	0.94847	0.74285	0.014068	0.20417	0.83699	-0.31825	0.71585	-0.05435	0.99936	-0.38942	0.65344	0.34591	0.55567
radixin	contig01878	-0.47535	0.58305	0.21585	0.90681	0.23045	0.80547	0.37553	0.99997	0.4044	0.65318	0.060167	0.97364	0.54991	0.33186	0.0043635	0.99882	0.52286	0.56691	0.27294	0.89288	1.1238	0.033271	0.1601	0.95058	-0.11676	0.96989	0.31856	0.99743	-0.44757	0.85438	0.45643	0.69563
eukaryotic translation initiation factor 3 subunit i	contig01897	0.45137	0.45086	0.099734	0.95064	0.45379	0.42836	-0.009318	0.99997	0.065599	0.94139	-0.46613	0.55524	0.4133	0.33382	-1.1813	0.023863	0.16734	0.85035	-0.1712	0.91844	0.37743	0.38122	-0.11101	0.95517	-0.30949	0.82791	0.12313	0.99936	0.0079504	0.99945	0.2457	0.80236
eukaryotic translation initiation factor 3 subunit i	contig01898	0.52924	0.31794	-0.014196	0.99321	0.31555	0.58419	-0.24182	0.99997	1.0222	0.022014	-0.5585	0.41034	0.64434	0.090882	-0.69856	0.19983	0.20602	0.79204	-0.057129	0.97704	0.73594	0.050898	-0.38487	0.69374	-0.54223	0.52119	-0.21667	0.99869	-0.16193	0.95499	0.1344	0.9011
caspase apoptosis-related cysteine peptidase	contig01903	0.6861	0.031726	0.27195	0.70662	0.52137	0.10403	-0.099836	0.99997	1.0021	0.0014051	0.10783	0.87918	1.3121	9.2676e-06	0.38407	0.33298	0.93628	0.0034078	0.26332	0.69726	1.1763	6.1163e-05	0.19312	0.80845	0.47228	0.3256	-0.14594	0.99869	0.6185	0.14965	0.24742	0.64156
caspase apoptosis-related cysteine peptidase	contig01905	0.7467	0.029558	0.49377	0.46533	0.59535	0.083727	0.31109	0.955	1.1384	0.00089415	0.37039	0.46908	1.4163	8.9782e-06	0.69573	0.05518	0.95197	0.005245	0.48008	0.3811	1.321	3.7226e-05	0.52302	0.29571	0.58384	0.22266	-0.060985	0.99936	1.329	0.0002858	0.58022	0.16306
caspase apoptosis-related cysteine peptidase	contig01906	0.78882	0.035272	0.24303	0.78805	0.75297	0.04588	-0.076185	0.99997	1.1596	0.0015735	0.0082686	0.99433	1.5506	8.9782e-06	0.29635	0.58809	1.1736	0.0017827	0.21653	0.82068	1.524	2.1664e-05	0.17816	0.86512	0.56721	0.30735	-0.10504	0.99936	0.91306	0.046294	0.22305	0.74606
thioredoxin 2	contig01912	-0.025447	0.96342	0.17544	0.79181	0.08906	0.82002	-0.21584	0.99651	0.37719	0.18003	-0.22937	0.61313	0.61898	0.0049199	-0.090389	0.87727	0.22405	0.54979	-0.30586	0.53591	0.52403	0.016652	-0.098364	0.91132	-0.058706	0.96105	-0.34055	0.65166	-0.053454	0.97702	0.0071308	0.99326
	contig01918	0.23302	0.60363	0.058307	0.95857	0.30004	0.44353	-0.15081	0.99997	0.32597	0.40496	-0.53379	0.23372	0.77122	0.0045865	-0.45264	0.26545	0.47404	0.20201	-0.041528	0.97702	0.7072	0.0091861	-0.30903	0.64079	-0.21515	0.82203	-0.29206	0.89197	0.19443	0.89849	0.32075	0.53372
protein kinase epsilon	contig01931	0.78211	0.1758	0.32999	0.8325	-0.051044	0.9552	0.027544	0.99997	1.0771	0.039283	0.11129	0.9426	0.99834	0.022316	-0.18062	0.89411	0.81306	0.16703	0.13238	0.95615	1.2446	0.0049273	0.30667	0.85625	-0.68935	0.45682	-0.032398	0.99936	-0.68038	0.50305	0.26414	0.80714
	contig01935	0.47371	0.41742	0.54135	0.6031	0.3123	0.61268	0.52767	0.90303	0.13775	0.86727	0.7785	0.23528	0.61933	0.12569	0.52513	0.42085	0.41639	0.5341	1.2656	0.046851	0.51157	0.21465	0.43163	0.66403	0.063684	0.97971	-0.21525	0.99936	0.25992	0.91403	0.11394	0.92569
chromosome 6 open reading frame 186	contig01938	0.73274	0.4894	-2.114	0.37185	-0.15016	0.91128	-2.8933	0.077031	0.17924	0.90191	-3.1757	0.026843	0.16828	0.8458	-3.1164	0.0075477	-0.27697	0.88604	-3.1975	0.032319	0.43093	0.5817	-3.5099	0.012264	-0.33334	0.91136	-3.3891	0.046689	1.003	0.70935	-1.8909	0.15783
zinc an1-type domain 3	contig01948	0.12341	0.82603	0.28042	0.72305	0.25928	0.52989	-0.13489	0.99997	0.20677	0.66165	-0.2549	0.66938	0.68566	0.012525	0.097017	0.9	0.32917	0.45567	0.13934	0.89625	0.81784	0.0034267	0.067331	0.96154	0.20439	0.83898	0.29601	0.89275	-0.31269	0.73188	0.30708	0.56965
	contig01953	0.46844	0.13859	0.16322	0.8357	0.77957	0.01442	0.077744	0.99997	0.58757	0.044626	-0.0032242	0.99715	0.93514	0.00026741	0.4046	0.2713	0.39011	0.2609	0.13282	0.88427	0.94456	0.00033002	0.25203	0.68933	-0.072031	0.95472	0.38489	0.63677	0.26309	0.7624	0.6876	0.050366
vacuolar protein sorting-associated protein 4a	contig01962	0.6971	0.058754	0.52681	0.46533	0.75506	0.041224	0.10242	0.99997	0.88993	0.0097781	0.29874	0.62229	1.0274	0.00063212	0.36796	0.45261	0.90684	0.012089	0.59693	0.28169	1.0069	0.00093575	0.65446	0.19141	0.1797	0.87502	0.17909	0.99593	0.22895	0.87532	0.53817	0.24165
	contig01964	0.28119	0.4197	0.41756	0.48368	0.44694	0.13767	0.1937	0.99997	0.44266	0.13596	0.30694	0.49427	0.68934	0.0037236	0.37484	0.29938	0.28822	0.44144	0.30248	0.5893	0.71551	0.0029367	0.3769	0.43362	0.079413	0.94423	0.0044747	0.99997	0.32706	0.60142	0.29297	0.50552
chromosome 17 open reading frame 39	contig01965	0.56355	0.04408	0.35188	0.5364	0.49485	0.077029	0.00579	0.99997	0.83232	0.0020827	0.060552	0.92779	1.1376	1.0116e-05	0.033846	0.95863	0.59107	0.032793	0.043348	0.96891	1.0742	3.8502e-05	0.20434	0.74076	-0.077969	0.94248	-0.056555	0.99936	0.26348	0.70697	0.26365	0.53273
	contig01969	-0.057318	0.95896	0.33847	0.79719	0.67853	0.23649	0.12461	0.99997	0.97456	0.063556	0.18292	0.8802	1.1581	0.0076059	0.36183	0.67776	0.63922	0.31264	0.15268	0.93841	1.1052	0.010925	0.27776	0.85109	-0.16632	0.93579	-0.00407	0.99997	0.028458	0.99542	0.3895	0.67868
	contig01971	0.40563	0.13232	0.30178	0.58133	0.36914	0.1699	0.10951	0.99997	0.21987	0.48768	0.14457	0.77182	0.48998	0.018552	0.13418	0.7748	0.26296	0.42135	0.19543	0.7394	0.57523	0.0061335	0.29409	0.51274	-0.29999	0.52119	0.19964	0.93183	-0.007197	0.99854	0.44943	0.15657
	contig01972	0.31226	0.60535	0.11009	0.9356	0.4738	0.34744	-0.24387	0.99997	0.27265	0.66291	-0.23794	0.78655	0.95623	0.0086236	-0.50836	0.38809	0.54569	0.30176	-0.18753	0.89307	1.1309	0.0024251	-0.31928	0.75878	-0.11948	0.94646	-0.45236	0.81654	-0.11569	0.96938	-0.23278	0.793
	contig01975	0.13818	0.75864	0.18412	0.79887	0.072162	0.87139	-0.1152	0.99997	0.082839	0.86673	-0.13995	0.81307	0.45208	0.058672	-0.14007	0.80228	0.1401	0.77271	-0.052115	0.96419	0.51653	0.029346	-0.037976	0.97719	-0.13671	0.88575	-0.14747	0.99573	-0.019169	0.99386	0.041715	0.95996
hypothetical protein TcasGA2_TC016257 [Tribolium castaneum]	contig01992	-0.061114	0.9394	0.39632	0.65681	0.34258	0.47759	0.098817	0.99997	-0.21067	0.7198	0.30689	0.66549	0.34264	0.3304	0.50871	0.3177	-0.14461	0.84124	0.20438	0.8592	0.69843	0.033232	0.40104	0.60401	0.1435	0.92471	-0.23876	0.97855	-0.0046139	0.99945	-0.093849	0.92613
	contig02002	4.3401	0.010209	0.22822	0.97002	3.2961	0.053972	-0.02026	0.99997	4.706	0.0037621	-0.28557	0.94653	5.6955	9.1831e-05	-0.82776	0.79151	4.625	0.006232	-0.72896	0.88629	5.0466	0.00046686	-0.074629	0.99208	2.441	0.35213	0.051085	0.99936	3.0919	0.19517	-0.044852	0.99318
	contig02007	0.53874	0.24435	0.74969	0.32772	0.3609	0.46754	0.82756	0.33604	0.77861	0.058309	0.90912	0.089619	0.56723	0.10019	0.91131	0.042777	-0.14505	0.84738	0.451	0.56899	0.3497	0.33535	0.86398	0.11914	0.3512	0.72209	0.34299	0.91673	-0.4869	0.57487	0.31227	0.66854
	contig02012	0.038509	0.95794	0.021664	0.98582	0.19621	0.66427	0.17657	0.99997	0.46987	0.20073	-0.10789	0.89347	0.47308	0.098937	-0.16017	0.81098	0.23298	0.65179	-0.091979	0.94313	0.70572	0.012469	0.028702	0.98513	-0.3211	0.67657	-0.1447	0.99936	-0.23821	0.85485	0.21573	0.73955
	contig02013	0.65061	0.26079	-0.94586	0.31101	0.82511	0.12357	-0.89384	0.4719	0.35699	0.60723	-1.1209	0.09269	0.58943	0.17619	-0.95409	0.098013	0.17712	0.85012	-1.1035	0.12739	0.82836	0.049778	-1.0247	0.14414	-0.01767	0.99466	0.0032589	0.99997	-0.025909	0.99604	-0.10809	0.93449
	contig02017	-0.056949	0.94668	0.64257	0.45823	-0.62281	0.16041	0.85384	0.31824	0.43861	0.36828	0.63616	0.27347	0.53492	0.12919	0.96724	0.033296	0.39151	0.48859	0.5591	0.4373	0.41627	0.2496	0.72426	0.23361	0.12697	0.93943	0.28637	0.95964	-0.4973	0.56861	0.32361	0.65881
zinc finger and btb domain containing 43	contig02018	-0.075787	0.86886	0.2251	0.71207	0.029187	0.94794	0.038548	0.99997	0.16255	0.65565	0.06908	0.91272	0.5461	0.01053	0.086844	0.87945	0.21136	0.56691	0.32749	0.47876	0.4822	0.02373	0.086439	0.92466	0.066753	0.95096	-0.082373	0.99936	0.075425	0.96585	0.024169	0.97676
	contig02027	0.30225	0.46273	0.41749	0.5552	0.61459	0.073603	0.10288	0.99997	0.49345	0.15452	-0.075848	0.92648	0.80225	0.0035262	0.32026	0.49685	0.54173	0.13172	0.31056	0.65593	0.87867	0.0017827	0.27234	0.70518	0.13625	0.90993	0.1666	0.99593	-0.092104	0.9667	0.32646	0.52731
	contig02030	0.46421	0.22395	0.36087	0.62984	0.57048	0.1123	0.15684	0.99997	0.59257	0.088328	-0.11859	0.88228	0.84573	0.0031346	0.32997	0.50252	0.55754	0.13685	0.29447	0.69684	0.9137	0.0017762	0.23856	0.77486	0.088451	0.95096	0.32133	0.86786	-0.021924	0.99402	0.51342	0.25509
low-density lipoprotein receptor-related protein 2	contig02048	0.93894	0.08318	0.3869	0.75297	0.65663	0.24393	0.34415	0.99997	1.6772	0.0014051	0.49324	0.55941	2.1442	1.175e-05	0.60566	0.3738	1.5846	0.0031168	0.27307	0.85216	1.8472	0.00010931	0.56518	0.54846	0.48081	0.67992	-0.008996	0.99989	0.72258	0.43257	0.40407	0.6537
	contig02049	0.99424	0.16253	0.36283	0.8357	0.56567	0.47762	0.46828	0.99997	1.8659	0.0041002	0.54139	0.63525	2.4378	4.4579e-05	0.84389	0.31478	1.6943	0.011951	0.60493	0.66559	2.0368	0.00043844	0.67454	0.59338	0.42954	0.82284	0.41162	0.97484	0.48849	0.83938	0.85597	0.34686
very low density lipoprotein receptor	contig02050	0.79261	0.055487	0.15697	0.88987	0.64827	0.11856	0.16564	0.99997	1.1041	0.0046345	0.29228	0.68348	1.598	1.7161e-05	0.33194	0.5785	0.89815	0.027169	-0.0081861	0.99618	1.4019	0.00012798	0.22387	0.83343	0.30638	0.76119	-0.076593	0.99936	0.3503	0.76568	0.35521	0.58507
glucosamine-phosphate n-acetyltransferase 1	contig02058	0.30808	0.62986	0.22044	0.86025	0.88643	0.062895	0.23033	0.99997	0.82551	0.071959	-0.21153	0.82359	1.1402	0.0028364	-0.25895	0.75639	0.89326	0.062503	-0.16935	0.91395	0.62565	0.1022	0.12122	0.94692	0.50101	0.57806	0.20041	0.99936	0.0041576	0.99945	-0.026085	0.9861
	contig02067	0.060227	0.92738	0.021458	0.98558	0.19831	0.65081	-0.055205	0.99997	0.051669	0.9322	-0.11677	0.87945	0.56823	0.039527	-0.044866	0.95518	0.19295	0.71637	-0.16178	0.86986	0.54267	0.049241	-0.075193	0.95625	-0.24934	0.77634	-0.13898	0.99936	-0.38369	0.59681	0.023917	0.98242
	contig02069	0.58213	0.69478	-0.37703	0.91804	-0.27655	0.85738	0.79989	0.99997	-1.772	0.084723	1.3287	0.44275	-1.057	0.41359	0.53922	0.80684	-1.077	0.4076	-0.07061	0.98713	-1.7074	0.04185	0.017719	0.9974	-0.61802	0.83945	0.66892	0.99117	-1.3098	0.49885	0.76379	0.71763
	contig02070	0.0086097	0.9925	0.24146	0.80715	0.56707	0.16877	-0.028777	0.99997	0.16605	0.78316	-0.0328	0.97668	0.86373	0.0069855	0.36243	0.51817	0.20041	0.75552	0.11273	0.93841	0.92839	0.0041836	0.1082	0.94297	0.28313	0.78323	0.29149	0.94158	0.046363	0.98804	0.41369	0.47722
	contig02087	0.1752	0.68304	0.23461	0.73956	0.35288	0.28322	0.13509	0.99997	0.47283	0.12003	0.090661	0.89764	0.81293	0.0011314	0.082001	0.90539	0.30648	0.42381	0.10908	0.91432	0.68105	0.0056248	0.20495	0.77514	0.032415	0.98329	0.054302	0.99936	0.014684	0.99612	0.40742	0.30884
	contig02115	0.34265	0.57761	-0.15217	0.90884	0.041293	0.95812	-0.35337	0.99779	0.83511	0.067653	-0.4956	0.48914	1.1728	0.0021673	-0.38122	0.58049	0.83785	0.083943	-0.27947	0.81634	1.003	0.0080507	-0.15648	0.92092	0.36334	0.74993	-0.38208	0.91673	0.40491	0.76386	0.015332	0.99165
	contig02122	0.65797	0.038283	0.17047	0.8316	0.70806	0.027947	-0.024524	0.99997	0.59856	0.04782	-0.53243	0.19435	0.78639	0.0020696	-0.54256	0.11942	0.44041	0.20222	-0.29593	0.63804	0.65241	0.0096797	0.0095593	0.99548	-0.23174	0.76965	-0.17127	0.98713	-0.28706	0.72905	-0.034473	0.97124
ac transposable element derived 3	contig02143	0.087413	0.9045	0.44567	0.58856	0.44303	0.30088	0.29712	0.99779	0.28809	0.56708	0.52139	0.34123	0.5567	0.080304	0.84966	0.041264	0.27232	0.63029	0.34421	0.67519	0.76793	0.014611	0.58778	0.31572	0.25262	0.81809	0.16548	0.99936	-0.11985	0.96301	0.4513	0.40919
s-phase kinase-associated protein 1	contig02149	0.64389	0.042007	0.33391	0.61346	0.6224	0.050326	0.17048	0.99997	0.55052	0.07039	-0.092757	0.89813	0.88235	0.00066059	0.030493	0.96639	0.54855	0.090181	0.1453	0.87251	0.91827	0.00055409	0.43177	0.38325	-0.24437	0.74615	0.12542	0.99936	-0.23367	0.8282	0.36816	0.39433
actin	contig02159	0.72661	0.069393	-0.21638	0.82901	0.46907	0.26592	-0.21868	0.99997	0.13769	0.8238	-0.78237	0.11906	0.5059	0.11533	-1.0316	0.012244	0.10565	0.88438	-0.78919	0.14567	0.72793	0.020668	-0.78198	0.13307	-0.46963	0.49738	-0.59704	0.4858	-0.2843	0.83868	-0.17775	0.82349
	contig02169	2.175	0.007633	-0.11703	0.96753	0.93302	0.28718	0.40727	0.99997	1.7862	0.020349	-0.039922	0.98531	2.0598	0.0017976	-0.3978	0.79085	1.3694	0.10397	-0.20753	0.94454	1.8058	0.0057837	0.29579	0.90926	-0.79626	0.62849	-0.051537	0.99936	0.21345	0.96809	0.3956	0.80523
ap-3 complex subunit sigma-2	contig02195	1.5887	0.013389	0.22118	0.90005	0.86158	0.19668	0.35562	0.99997	0.84662	0.20604	0.42005	0.71887	0.9879	0.055977	0.13589	0.92799	0.61356	0.45669	0.40939	0.79655	1.6367	0.0019472	0.44319	0.76448	-0.077948	0.98096	0.081911	0.99936	0.32262	0.92325	0.84109	0.32135
vitellogenin structural genes (yolk protein genes) family member (vit-1)-like	contig02198	0.71495	0.36265	0.40795	0.80933	0.80227	0.2723	-0.14292	0.99997	1.2823	0.050383	-0.51099	0.66314	1.8741	0.00082397	-0.43376	0.69914	1.5598	0.02121	-0.1917	0.93841	1.5312	0.0053496	-0.23091	0.91837	0.52904	0.7469	-0.16328	0.99936	1.3303	0.1491	-0.20967	0.89238
vitellogenin	contig02199	1.3733	0.13346	-0.0047991	0.998	1.2861	0.15734	-0.48761	0.99997	1.9435	0.020524	-1.1142	0.37127	2.5288	0.00055943	-2.0056	0.03128	1.9322	0.028075	-0.69109	0.72249	2.1145	0.0032789	-0.86225	0.60511	0.096453	0.98264	-0.38974	0.99936	1.1534	0.46878	-0.33637	0.85921
vitellogenin structural genes (yolk protein genes) family member (vit-1)-like	contig02200	0.27173	0.75484	0.23739	0.87966	0.68704	0.26406	-0.33793	0.99997	0.95384	0.091209	-0.38993	0.70629	1.3714	0.0031504	-0.62349	0.4063	1.2631	0.027205	-0.31975	0.83512	1.0467	0.022586	-0.14353	0.94749	0.35511	0.82941	-0.12721	0.99936	0.7065	0.51339	-0.18665	0.884
sc blase (phospholipid scramblase) family member (scrm-1)	contig02205	0.28555	0.324	0.37537	0.46071	0.35021	0.18734	0.1766	0.99997	0.3976	0.11962	0.22724	0.58505	0.66285	0.001509	0.41136	0.15653	0.25555	0.4293	0.28553	0.53718	0.67148	0.0015453	0.31583	0.45796	-0.055932	0.96006	0.17348	0.95693	-0.095422	0.94899	0.3803	0.2405
	contig02206	0.45588	0.12419	0.023324	0.98152	0.29206	0.3617	-0.030711	0.99997	0.4408	0.12501	-0.082545	0.90192	0.5973	0.0093356	-0.12235	0.82654	0.38352	0.23274	-0.21961	0.73229	0.67948	0.0036017	0.069819	0.95013	0.026954	0.98519	0.21899	0.93292	0.13634	0.92926	0.34808	0.37552
	contig02209	0.31901	0.49891	0.39386	0.62498	0.70921	0.065124	0.38367	0.91875	0.44126	0.28249	0.5835	0.25182	0.97175	0.0017329	0.91585	0.021801	0.28323	0.59896	-0.011338	0.9926	0.992	0.0016549	0.55206	0.33898	0.0090943	0.9957	0.46424	0.66346	-0.045695	0.98777	0.7272	0.10782
	contig02212	0.90195	0.0045992	0.37659	0.56707	0.55131	0.081048	0.21565	0.99997	0.66841	0.02466	0.33119	0.48685	0.83239	0.001163	0.56305	0.10117	0.6225	0.048108	0.30293	0.61826	0.98872	0.00027744	0.45307	0.33946	-0.65342	0.10863	0.16296	0.99196	-0.52698	0.25052	0.37603	0.38121
retinitis pigmentosa gtpase regulator protein 2 orf15	contig02217	0.25213	0.52095	0.16001	0.84351	0.40665	0.21448	-0.31753	0.91276	0.70062	0.017893	-0.14868	0.81129	1.0636	8.2659e-05	0.10272	0.87769	0.68848	0.026756	0.013597	0.98969	0.9655	0.00033731	0.12214	0.89844	0.26066	0.71917	-0.017651	0.99936	0.076671	0.97049	0.2476	0.63242
	contig02218	0.16458	0.64104	0.13274	0.84351	0.2488	0.39711	-0.22809	0.96994	0.24575	0.41599	0.11875	0.81995	0.52225	0.011742	0.36637	0.23179	0.11225	0.79493	0.08821	0.91897	0.54985	0.0083363	0.22099	0.67612	0.012554	0.99283	0.17852	0.95096	0.013792	0.99528	0.46156	0.13996
	contig02219	-0.068614	0.91817	0.079637	0.94118	0.26004	0.5401	-0.24793	0.99997	0.35501	0.3736	-0.22446	0.72743	0.91487	0.0014303	-0.19917	0.74426	0.42344	0.29928	0.17884	0.8548	0.79259	0.0052735	0.09242	0.94501	0.19898	0.84796	0.0038523	0.99997	0.19425	0.90635	0.23863	0.70359
mediator of rna polymerase ii transcription subunit 19	contig02226	0.58629	0.10498	0.32221	0.67954	0.52277	0.14795	0.16472	0.99997	0.28234	0.51806	0.14061	0.85123	0.65503	0.019878	0.040286	0.96034	0.37274	0.38807	0.15702	0.87852	0.80319	0.0048456	0.42473	0.4732	-0.23395	0.80944	0.2641	0.93583	-0.2992	0.77296	0.46473	0.3172
	contig02229	0.32055	0.6019	-0.17504	0.89135	0.21761	0.72572	-0.33645	0.99997	-0.15125	0.83788	-0.53571	0.43203	0.098606	0.83346	-1.173	0.015584	-0.16342	0.84107	-0.98027	0.12478	0.27089	0.51414	-0.60779	0.41787	-0.35413	0.75283	-0.3262	0.95049	0.020398	0.99645	-0.083023	0.94581
cytochrome family subfamily polypeptide 2-like	contig02241	-0.54611	0.54742	-0.76138	0.61153	-1.0417	0.15266	-1.5083	0.26078	0.51515	0.57126	-2.225	0.006818	0.64267	0.28533	-2.6539	0.00045396	-0.066933	0.96492	-1.8803	0.038074	0.062078	0.93433	-2.2952	0.0046866	-0.021129	0.99466	-1.8941	0.066584	-0.78452	0.60595	-2.7465	0.0010866
	contig02253	-0.032589	0.95857	0.38601	0.53108	0.22086	0.54631	0.20967	0.99997	0.19828	0.62221	0.30052	0.52118	0.53277	0.027548	0.61538	0.056437	0.22705	0.59409	0.28996	0.62604	0.61588	0.011048	0.31389	0.56678	0.1355	0.89019	0.17372	0.9793	0.042472	0.9855	0.49698	0.1836
lipase	contig02254	1.5359	0.12044	0.45381	0.85829	1.6934	0.080375	0.15325	0.99997	2.0557	0.024098	-0.061476	0.98117	2.7018	0.00066045	-0.45899	0.79851	2.2074	0.020585	-0.59348	0.80353	2.1811	0.0049555	0.00062999	0.99968	0.53472	0.85106	-0.012286	0.99997	1.8108	0.17274	-0.090163	0.9757
kiaa0907 protein	contig02262	0.16809	0.74838	-0.066771	0.95318	0.5778	0.10045	-0.29662	0.97969	0.51497	0.14279	-0.29159	0.61237	0.78903	0.00476	-0.088337	0.91022	0.36928	0.38522	-0.15386	0.88075	0.70728	0.011136	-0.088018	0.94698	0.37599	0.56763	0.18856	0.98768	0.60483	0.22629	0.26041	0.66011
cg12012 cg12012-pa	contig02265	0.58723	0.17583	0.30844	0.74476	0.2509	0.62644	0.23286	0.99997	0.69301	0.084897	-0.1792	0.82922	0.92119	0.0052062	0.14112	0.86987	0.38955	0.46115	0.11523	0.93841	0.9064	0.0061283	-0.078169	0.96338	-0.036079	0.98641	-0.21738	0.98932	0.097094	0.97149	0.085045	0.93383
conserved protein	contig02266	0.92288	0.049641	-0.38131	0.7213	0.32423	0.56819	-0.25186	0.99997	-0.13936	0.85389	-0.51433	0.46011	0.14732	0.74476	-0.5418	0.36027	-0.073828	0.9359	-0.43743	0.63825	0.35646	0.37511	-0.15661	0.91948	-1.1384	0.05048	0.53138	0.72357	-0.25951	0.90491	0.48658	0.4706
	contig02268	0.24719	0.63652	0.3862	0.63857	0.022645	0.97329	0.054528	0.99997	0.51676	0.19533	0.15938	0.84351	0.7866	0.010615	0.061123	0.94724	0.34607	0.49504	0.07878	0.95912	0.61591	0.045875	0.17799	0.87103	0.16611	0.89771	-0.28307	0.93936	0.11024	0.96558	-0.027537	0.98208
	contig02277	0.050555	0.93925	0.69995	0.22219	-0.17785	0.6873	-0.24122	0.99997	-0.41629	0.24744	0.24434	0.68021	0.19227	0.53224	0.3411	0.45589	-0.35286	0.40034	0.3452	0.59347	0.19514	0.52141	-0.0033231	0.99864	-0.39073	0.52119	-0.058252	0.99936	-1.1014	0.003043	-0.11015	0.88368
trna (cytosine-5-)-methyltransferase nsun2	contig02282	0.54179	0.48926	0.57033	0.68985	0.39135	0.62482	0.48743	0.99779	0.4484	0.58905	0.82046	0.35901	0.38379	0.50384	1.3536	0.04541	0.86912	0.22028	1.4401	0.093962	0.83298	0.10751	0.77904	0.46539	0.21526	0.92705	0.40111	0.96921	0.10339	0.9817	1.0081	0.20649
	contig02286	0.28046	0.37229	0.30715	0.58913	0.60466	0.029132	-0.12179	0.99997	0.35569	0.21012	0.058578	0.92902	0.77675	0.00056056	0.21699	0.58716	0.27189	0.42716	0.017366	0.98675	0.75867	0.000869	0.18804	0.76359	0.039767	0.97739	0.11392	0.99936	0.094341	0.95444	0.30772	0.41844
atp synthase a chain	contig02289	1.1566	0.052062	1.0421	0.32598	1.3962	0.0216	0.3037	0.99997	2.1143	0.0004192	0.47618	0.62754	2.2679	1.9884e-05	0.90175	0.18234	1.6627	0.0048292	0.87155	0.35171	2.314	3.3091e-05	0.76386	0.42516	1.073	0.18112	0.28244	0.99767	0.71836	0.51849	0.13668	0.92483
atp synthase a chain	contig02290	1.4366	0.0066748	1.1866	0.16851	1.5092	0.0083269	0.55321	0.90626	1.979	0.00025154	0.59924	0.44029	2.4463	2.1797e-06	1.2798	0.020197	1.6457	0.0019495	1.0774	0.13687	2.5427	2.7624e-06	0.96216	0.17838	0.71104	0.40381	0.57909	0.74717	0.26218	0.92383	0.40537	0.64589
isoform b	contig02291	1.7366	0.046184	0.45227	0.84002	0.67714	0.5104	0.23669	0.99997	1.818	0.026796	0.61115	0.68743	2.167	0.0019922	-0.0077312	0.99813	1.2593	0.17792	0.31057	0.91338	1.4543	0.034998	0.49036	0.82627	-0.35801	0.90493	-0.038568	0.99936	0.89042	0.65283	0.42153	0.80507
	contig02293	1.4693	0.086462	-0.15515	0.95522	1.2819	0.13461	0.19601	0.99997	0.44731	0.70672	0.16957	0.93458	1.0423	0.12888	-0.46933	0.74949	0.87881	0.39635	1.5259	0.20702	1.5806	0.018425	0.098975	0.97925	-0.17384	0.96352	0.75423	0.87106	0.66459	0.80926	1.2608	0.23357
	contig02294	0.86633	0.011288	0.12717	0.89213	0.65905	0.056476	-0.23801	0.99997	0.67399	0.038961	-0.33366	0.53119	1.1142	0.00013559	-0.44629	0.28137	0.72744	0.03291	-0.17349	0.85543	1.3682	2.8338e-05	-0.27673	0.6983	-0.21801	0.821	-0.087886	0.99936	0.3587	0.64266	0.29146	0.5953
methionine adenosyltransferase alpha	contig02295	1.293	0.056846	1.6076	0.12537	0.89397	0.2642	0.96265	0.67598	0.94434	0.16776	1.259	0.14172	1.4288	0.0077492	1.0783	0.15532	0.84588	0.26793	0.96756	0.36652	1.5249	0.0049235	1.1385	0.22353	0.39325	0.84097	-0.088166	0.99936	0.90234	0.44028	0.56271	0.60382
methionine adenosyltransferase	contig02296	0.68742	0.24422	0.54019	0.64163	0.3066	0.65877	0.45617	0.98207	0.61035	0.2998	0.018031	0.99057	1.0923	0.011612	0.65968	0.32928	1.2234	0.023368	0.75381	0.39087	1.1062	0.010864	0.54191	0.58941	0.37643	0.79035	0.56398	0.78595	0.86775	0.29261	0.13366	0.91859
	contig02297	-0.51241	0.47343	0.16342	0.92467	0.58979	0.36923	0.62758	0.90296	0.73738	0.23535	0.44503	0.6589	1.0764	0.021865	0.095971	0.94519	0.91515	0.14133	0.63843	0.55134	1.2667	0.0073432	0.58997	0.58728	1.002	0.22661	0.38314	0.96323	0.87998	0.3496	0.76483	0.32656
	contig02298	0.34615	0.273	0.094366	0.90533	0.53134	0.065499	-0.13465	0.99997	0.32564	0.29271	0.017171	0.98232	0.7564	0.0012224	0.10613	0.8553	0.17441	0.68327	0.19993	0.76802	0.7376	0.0017727	0.10718	0.90518	-0.16049	0.84977	0.12929	0.99936	0.15375	0.91	0.47597	0.17553
	contig02299	-0.10066	0.88738	0.15626	0.88584	0.63605	0.11496	0.26024	0.99997	0.34977	0.46267	0.14517	0.86633	0.65695	0.039308	0.31178	0.59603	0.7145	0.080006	0.46281	0.51024	0.91247	0.0045966	0.24753	0.80003	0.14531	0.91959	0.23083	0.97855	-0.22341	0.90334	0.17961	0.82309
alkyl sulfatase or beta-lactamase	contig02302	0.83248	0.16006	-0.22266	0.88563	0.72558	0.22255	-0.5558	0.92651	1.1085	0.040113	-0.86201	0.25334	1.341	0.003281	-1.0608	0.082784	1.3069	0.019819	-1.1011	0.1596	0.82828	0.068358	-0.77693	0.38422	-0.29834	0.86115	-0.35749	0.96632	-0.27716	0.92567	-0.27541	0.80523
	contig02303	0.34398	0.64285	-0.049831	0.9792	0.44555	0.48847	-0.12596	0.99997	0.79494	0.15	-0.53407	0.52929	1.1812	0.0068157	-0.77688	0.22444	0.43638	0.56016	-0.51098	0.63961	0.85158	0.051117	-0.22537	0.89175	-0.75323	0.38581	-0.29202	0.98855	-0.84378	0.31937	-0.12154	0.92836
	contig02305	0.20307	0.63652	0.33823	0.61271	0.2665	0.47213	0.062069	0.99997	0.49768	0.11375	-0.0019588	0.99798	0.86067	0.00093295	0.29025	0.51196	0.28016	0.50484	0.014807	0.98957	0.85519	0.0011647	0.091467	0.93689	-0.10396	0.92993	0.026483	0.99936	-0.29868	0.71028	0.26502	0.60609
	contig02307	0.37648	0.20246	0.38374	0.49053	0.3956	0.16513	-0.02421	0.99997	0.35799	0.21611	0.042399	0.9521	0.64007	0.0040501	0.18075	0.68776	0.088481	0.85894	0.13987	0.85625	0.80246	0.00060557	0.019902	0.98793	-0.30432	0.55259	0.022849	0.99936	-0.24907	0.73841	0.24594	0.57163
aaa atpase domain containing protein	contig02310	0.32384	0.34259	0.30686	0.62804	0.6538	0.032054	0.097636	0.99997	0.50394	0.085913	0.13013	0.83058	0.78003	0.0014089	0.078833	0.90685	0.23893	0.56204	0.21591	0.75616	0.75407	0.0021583	0.16768	0.83051	-0.0085866	0.99467	0.0068026	0.99982	0.069083	0.97192	0.33122	0.43189
hypothetical protein BRAFLDRAFT_88540 [Branchiostoma floridae]	contig02313	1.1753	0.22059	0.15815	0.96372	0.63895	0.55522	1.0555	0.90303	1.3772	0.12202	0.91015	0.56996	1.8544	0.0093928	0.045172	0.98563	1.6998	0.060478	0.64388	0.79239	1.6868	0.017957	0.4661	0.86809	-0.20677	0.95636	0.58137	0.96321	-0.30395	0.95527	0.64783	0.67372
carboxypeptidase b	contig02334	0.83272	0.3873	0.11105	0.9705	0.66116	0.50087	-0.26679	0.99997	1.3237	0.10595	-0.84318	0.50455	1.9161	0.0040287	-0.85497	0.43853	1.6604	0.045888	-0.44129	0.84558	1.217	0.06734	-0.338	0.89298	0.97626	0.50274	-0.082105	0.99936	1.5672	0.16895	0.063555	0.98152
carboxypeptidase a	contig02335	1.4065	0.19041	0.93445	0.67621	1.0563	0.34539	1.2269	0.83119	2.1204	0.027625	0.95153	0.55147	3.1264	0.00024185	0.67012	0.68165	1.9146	0.061984	0.81785	0.70859	2.3978	0.0035223	1.1202	0.52508	1.6305	0.26511	-0.28484	0.99936	1.8676	0.18757	0.18613	0.94403
PREDICTED: hypothetical protein [Saccoglossus kowalevskii]	contig02337	0.417	0.51361	0.11779	0.93962	0.69465	0.18994	0.092813	0.99997	0.42651	0.49412	-0.18576	0.86673	0.86457	0.03447	-0.5695	0.38917	0.29942	0.69989	-0.016146	0.99259	0.83802	0.040175	0.084696	0.96952	0.17565	0.92573	0.26971	0.98946	-0.017658	0.99793	0.4787	0.5409
cytochrome b	contig02350	0.32679	0.40201	-0.4096	0.55283	0.69187	0.041224	-0.11711	0.99997	0.050683	0.93139	-0.57521	0.18342	0.25789	0.37137	-0.43526	0.28054	-0.13238	0.8148	-0.25719	0.72784	0.32553	0.24356	-0.11518	0.9154	-0.41519	0.46473	0.1337	0.99936	-0.24011	0.83938	0.3777	0.41797
	contig02373	1.388	0.061813	0.16981	0.93912	0.96394	0.2088	-0.32092	0.99997	1.6436	0.017889	-0.45915	0.73469	2.2509	0.00026218	-0.39697	0.75959	2.0292	0.005677	-0.036226	0.98882	1.9783	0.0011802	0.041727	0.99064	1.0688	0.34227	-0.096132	0.99936	1.5501	0.10417	-0.21952	0.89581
porin precursor	contig02374	0.73754	0.6339	0.32875	0.90921	0.30197	0.8577	0.12031	0.99997	1.2128	0.33944	-0.14609	0.95547	2.3249	0.011014	0.1537	0.94969	1.4007	0.28801	0.26668	0.94293	1.8799	0.03978	0.021134	0.99676	1.1557	0.53388	0.053574	0.99936	1.8646	0.19672	-0.11197	0.97124
	contig02375	0.5939	0.28629	-0.2109	0.87634	0.74307	0.14831	-0.014598	0.99997	1.1546	0.014785	-0.30742	0.74254	1.1931	0.0032106	-0.12857	0.90907	0.92487	0.070755	-0.22542	0.87662	1.1295	0.0052803	-0.24199	0.86405	0.050099	0.98423	0.40342	0.91848	0.33751	0.85552	0.67147	0.30751
	contig02378	0.089661	0.86325	0.34679	0.58432	0.35759	0.27182	0.25105	0.98809	0.46075	0.13011	0.28236	0.55785	0.53599	0.027013	0.45961	0.18825	0.34627	0.33484	0.18328	0.81067	0.59144	0.014668	0.40334	0.40894	0.013586	0.99415	-0.090464	0.99936	0.18973	0.87778	0.3512	0.40381
	contig02385	-0.10419	0.86145	0.2356	0.77895	0.13556	0.77915	-0.14462	0.99997	0.38196	0.31969	-0.23031	0.7156	1.0206	0.00044363	-0.044655	0.95605	0.34525	0.4352	-0.164	0.87035	0.93532	0.0012681	-0.20881	0.8127	0.39119	0.54246	-0.17954	0.9935	0.38764	0.60142	-0.11569	0.88024
	contig02402	0.3322	0.61084	0.34623	0.76582	0.3383	0.57182	0.21561	0.99997	0.47374	0.40273	0.36611	0.6659	0.64164	0.10756	0.15723	0.88163	0.53829	0.36194	0.36992	0.73777	0.79342	0.043117	0.3398	0.76316	-0.35871	0.77182	0.025574	0.99936	0.062212	0.98743	0.43651	0.57101
fibrinolytic enzyme	contig02405	1.2847	0.071211	0.17643	0.93247	1.5602	0.029094	0.13931	0.99997	2.4051	0.00069219	-0.062115	0.97455	2.9473	8.2647e-06	-0.10182	0.95097	2.363	0.00087117	-0.0093735	0.99719	2.323	0.00017676	0.13694	0.96162	0.94953	0.40281	-0.24024	0.99936	1.5318	0.089684	-0.067135	0.97538
elastase pancreatic	contig02406	1.9079	0.10496	1.182	0.6251	1.4389	0.23554	1.2351	0.89655	3.178	0.0038545	1.0869	0.54777	4.1833	3.7483e-05	1.0386	0.51873	2.5921	0.023125	1.1621	0.5955	3.2521	0.00074913	1.3273	0.49988	0.019717	0.99645	0.3126	0.99936	1.4291	0.50195	0.47586	0.84109
n-acetylglucosaminyl-phosphatidylinositol de-n-	contig02409	0.25414	0.59849	0.14582	0.88372	0.1911	0.68798	-0.012731	0.99997	0.58097	0.10779	0.11879	0.88608	1.1262	0.00024614	0.43943	0.33622	0.41926	0.33047	-0.1409	0.90383	1.0504	0.00065255	0.03715	0.98278	-0.36369	0.61983	0.0071932	0.99988	-0.84226	0.068255	0.42641	0.39742
n-acetylglucosaminyl-phosphatidylinositol de-n-acetylase	contig02410	0.27013	0.41542	0.073524	0.92889	0.086646	0.83005	-0.18336	0.99997	0.13092	0.7513	-0.22373	0.6369	0.50038	0.025994	-0.17266	0.71323	-0.08976	0.85942	-0.22162	0.71894	0.46936	0.036795	-0.086565	0.93134	-0.36431	0.43289	-0.088439	0.99936	-0.14826	0.91356	0.21061	0.66011
ubiquitin-like protein 4a	contig02417	0.97961	0.0026007	0.23612	0.74871	1.0091	0.0038565	0.10699	0.99997	0.82004	0.0066431	-0.24859	0.64643	1.2791	1.2816e-05	-0.043744	0.95306	0.62805	0.050967	-0.040176	0.97593	1.2729	2.8851e-05	-0.017452	0.99065	-0.38225	0.49459	-0.073974	0.99936	-0.15089	0.92926	0.11285	0.86953
	contig02422	-0.059581	0.96242	0.29937	0.8562	0.58328	0.41102	0.017054	0.99997	0.41699	0.61254	0.036295	0.98296	1.0485	0.035511	0.18633	0.89218	0.88177	0.19579	0.33272	0.84488	0.97119	0.051773	0.36629	0.81626	0.52638	0.7131	0.55427	0.87406	0.98451	0.30275	0.38149	0.73897
	contig02426	1.2775	0.052083	1.3099	0.16851	0.94794	0.2003	1.3843	0.15062	1.1685	0.063521	1.1657	0.11435	1.0554	0.042809	1.318	0.031426	0.78966	0.29201	1.2273	0.12623	1.3499	0.0096202	1.5532	0.027733	0.28716	0.87479	0.32022	0.9857	0.54489	0.71304	0.97948	0.16854
pr domain containing 10 isoform 1	contig02446	0.18792	0.80861	0.43712	0.68605	0.41498	0.46325	0.15108	0.99997	0.19672	0.78913	0.047879	0.97028	0.69552	0.075915	-0.0045275	0.9981	0.69048	0.19247	0.30147	0.80279	1.0108	0.009347	0.43383	0.64996	-0.036319	0.98942	0.19765	0.99936	0.36687	0.82331	0.29612	0.73964
	contig02450	-0.061954	0.92436	0.2386	0.76978	0.16968	0.70666	-0.029274	0.99997	0.16729	0.73633	0.010895	0.99127	0.53791	0.050964	0.46489	0.25659	0.0097992	0.98863	0.20155	0.81837	0.63003	0.021212	0.097999	0.93779	0.02915	0.98711	-0.0049754	0.99997	-0.133	0.94649	0.3116	0.55864
	contig02453	0.5897	0.047185	0.78365	0.068855	0.78091	0.012316	0.22474	0.99779	0.60202	0.032026	0.15379	0.78665	0.94285	0.00016304	0.50421	0.12245	0.50221	0.099302	0.33321	0.52621	1.0604	7.8395e-05	0.42179	0.3482	-0.42127	0.35923	0.47388	0.43163	-0.65041	0.088065	0.42117	0.26334
j domain protein 1	contig02454	1.3752	0.017136	-0.38534	0.78119	0.30373	0.6855	-0.25519	0.99997	0.55636	0.40291	-0.28032	0.80553	0.56603	0.24066	-0.9829	0.12434	0.36658	0.66567	-0.83236	0.36629	0.82032	0.077089	-0.47527	0.69005	-0.30959	0.85733	-0.52776	0.86485	0.23892	0.94338	0.10055	0.94733
	contig02456	0.045611	0.93156	0.22515	0.72305	0.42072	0.13524	0.049343	0.99997	0.24101	0.46749	0.065214	0.92049	0.43028	0.052702	0.25564	0.50538	0.078547	0.87518	0.30053	0.54968	0.54823	0.013007	0.20609	0.73545	-0.22401	0.73051	0.19256	0.95049	-0.24264	0.75323	0.4356	0.20667
protein mitochondrial precursor	contig02461	0.18304	0.64422	0.11919	0.88088	0.45496	0.12425	-0.0091459	0.99997	0.32816	0.29849	-0.23907	0.62229	0.94511	0.00014015	0.26808	0.50887	0.25145	0.51881	-0.093166	0.9269	0.62291	0.0077152	-0.21129	0.74633	0.30853	0.57806	-0.31113	0.76376	0.56962	0.14835	0.082096	0.90262
	contig02469	0.59034	0.27661	0.3533	0.75859	0.68228	0.17826	0.29024	0.99997	0.81978	0.088862	0.757	0.24695	0.8923	0.022875	0.45848	0.50044	0.59766	0.29144	0.22789	0.87207	1.027	0.0091113	0.42853	0.66335	0.011995	0.99568	0.020925	0.99936	-0.25374	0.91777	0.31906	0.7203
	contig02473	0.4007	0.42008	0.51403	0.55536	0.38576	0.42406	0.24392	0.99997	0.95932	0.015783	0.28012	0.71222	1.2732	0.00030336	0.32517	0.60424	1.0328	0.013558	-0.084283	0.96005	1.1636	0.00094265	0.34999	0.68619	0.41636	0.62343	-0.25413	0.97509	-0.036583	0.99122	0.019008	0.98829
	contig02474	0.59822	0.019901	0.3102	0.55999	0.34136	0.19981	0.19412	0.99779	0.6051	0.012319	0.37198	0.28247	0.70017	0.00087152	0.32116	0.30774	0.40652	0.13169	0.24833	0.61558	0.73776	0.00064117	0.40228	0.27848	0.024914	0.98461	0.15029	0.97852	0.084042	0.95792	0.46804	0.12512
calmodulin b	contig02477	0.83028	0.21453	0.56451	0.72498	0.96014	0.13121	0.16876	0.99997	0.26552	0.77813	0.69112	0.52247	0.40775	0.46101	0.45372	0.68938	0.3763	0.68765	-0.15294	0.9554	1.1029	0.026843	0.76035	0.53474	-0.41378	0.80947	0.60812	0.828	-0.57487	0.72218	0.28017	0.82452
serine arginine repetitive matrix protein 1	contig02487	0.40717	0.11321	0.20923	0.71424	0.45416	0.071243	0.12497	0.99997	0.51779	0.029816	0.10175	0.84687	0.86009	7.3795e-05	0.34087	0.25357	0.30643	0.2879	0.078709	0.92808	0.72609	0.00060307	0.24636	0.59835	0.18387	0.7704	0.17855	0.9468	0.3175	0.49112	0.5282	0.068458
cyclin c	contig02491	0.85129	0.045411	-0.17586	0.87798	0.79016	0.063219	-0.37144	0.96866	0.34734	0.50205	-0.56813	0.33029	0.67728	0.045525	-0.49581	0.35453	0.12939	0.86554	-0.64299	0.32849	0.78851	0.019217	-0.4589	0.5365	-0.76205	0.18738	-0.044044	0.99936	-0.47899	0.58275	0.42638	0.49437
atp synthase a chain	contig02497	0.42673	0.38738	-0.12485	0.91815	0.1197	0.84554	-0.30434	0.99997	0.27613	0.6252	-0.71988	0.19347	0.2724	0.47043	-0.91658	0.040908	0.205	0.76645	-0.59308	0.38696	0.4506	0.20007	-0.44805	0.55479	-0.36903	0.69881	-0.3053	0.9446	-0.45353	0.63029	-0.49299	0.40126
	contig02500	1.5782	0.0030737	-0.27198	0.84043	1.124	0.034155	0.16163	0.99997	1.6803	0.0012305	-0.37589	0.68021	1.6199	0.00023501	-0.61914	0.34608	1.4555	0.012089	-0.39186	0.73883	1.4222	0.0010844	-0.10933	0.95867	-0.22894	0.89446	-0.26474	0.99531	-0.14655	0.96602	0.28797	0.77231
flagellar protein	contig02513	0.077008	0.91022	0.2871	0.73344	0.48704	0.19876	-0.094997	0.99997	0.3595	0.38808	-0.005668	0.99571	0.60281	0.038887	0.28469	0.59769	0.39285	0.37423	0.36531	0.59964	0.80277	0.0061873	0.19406	0.84112	0.18816	0.86617	-0.071543	0.99936	0.0093204	0.99878	0.25621	0.6878
3-like protein	contig02523	-0.22154	0.54362	-0.037393	0.97111	-0.016084	0.97466	-0.22321	0.99651	-0.0046229	0.99408	-0.36463	0.3628	0.098886	0.71941	-0.45223	0.16448	-0.33795	0.31089	-0.2852	0.602	0.047244	0.87058	-0.272	0.61956	-0.71735	0.047299	-0.22785	0.92215	-0.71458	0.040089	0.0072209	0.99343
cathepsin z	contig02533	1.2771	0.0018213	-0.49325	0.55121	1.4571	0.0009685	-0.65588	0.52378	0.88939	0.018818	-0.45474	0.44076	1.6003	1.2816e-05	-0.33141	0.56926	0.8541	0.031812	-0.1498	0.90768	1.5622	3.468e-05	-0.13468	0.91887	-0.43621	0.55932	0.30795	0.93137	0.019198	0.99612	0.48086	0.37957
cathepsin z	contig02535	1.0485	0.04268	0.93653	0.30007	0.32429	0.61111	0.48585	0.93844	1.2265	0.011357	-0.021056	0.98815	1.4785	0.00050534	0.070257	0.95306	1.4214	0.0055446	0.30672	0.81409	1.5583	0.00038886	0.39458	0.72102	0.23689	0.88551	-0.43601	0.89738	0.39366	0.81976	-0.2255	0.82988
cytochrome b5	contig02549	0.39352	0.36703	0.63339	0.36806	0.47385	0.2355	0.49901	0.77025	0.34912	0.43082	0.36146	0.5415	0.81517	0.0070245	0.50416	0.26652	0.091443	0.8973	0.36887	0.61122	0.78941	0.0091407	0.28956	0.72353	0.11748	0.93443	0.10699	0.99936	-0.061267	0.9817	0.55909	0.2415
	contig02551	0.56436	0.10227	0.48981	0.46455	0.59395	0.080457	0.40746	0.83347	0.37289	0.31085	0.11547	0.87708	0.83008	0.002354	0.19238	0.74113	0.14495	0.79598	0.088737	0.94281	0.82087	0.0028251	0.19832	0.81597	-0.17963	0.85967	0.11115	0.99936	0.022668	0.99307	0.62522	0.11827
	contig02555	0.8649	0.1262	0.51465	0.67019	0.50977	0.41486	0.26152	0.99997	0.48223	0.46177	0.22725	0.84231	0.925	0.03478	0.5032	0.5106	0.95883	0.089831	0.44135	0.70945	0.82117	0.061874	0.55207	0.58541	-0.19118	0.92479	0.66823	0.66252	-0.13062	0.97087	0.64017	0.39707
lactase-phlorizin hydrolase	contig02561	0.24278	0.85909	0.5015	0.79639	0.69255	0.45829	1.0283	0.78602	1.6507	0.030612	0.81973	0.50233	2.1092	0.0012705	0.72605	0.51818	1.1239	0.20105	0.87264	0.54894	1.4681	0.021648	0.63062	0.71281	0.25667	0.9329	-0.089364	0.99936	0.072278	0.99107	0.55335	0.69541
lactase-phlorizin hydrolase	contig02562	0.92459	0.19431	0.37356	0.82632	0.41167	0.62357	0.56041	0.98447	1.3546	0.033655	0.41102	0.74196	1.6853	0.0019362	0.21606	0.88018	0.9291	0.20735	0.32346	0.86405	1.2693	0.017566	0.27777	0.89115	-0.15087	0.95861	-0.16516	0.99936	-0.40016	0.89062	0.51481	0.64789
lactase-phlorizin hydrolase-like	contig02563	0.031515	0.96342	-0.11334	0.90442	0.45421	0.20014	-0.34516	0.91362	0.0034514	0.99628	-0.31202	0.568	0.71071	0.009077	-0.06511	0.93556	0.22794	0.64548	-0.28966	0.68488	0.50656	0.064178	-0.22986	0.774	-0.22523	0.81055	0.18634	0.98698	0.10546	0.9619	0.17623	0.78996
lactase-phlorizin hydrolase	contig02564	0.79047	0.2433	0.10326	0.9609	0.34867	0.66136	0.11607	0.99997	1.1303	0.060932	-0.034212	0.9841	1.3399	0.0072067	-0.24976	0.83979	0.76215	0.28828	-0.11496	0.96319	1.0753	0.030561	-0.25366	0.89345	-0.33879	0.85458	-0.39694	0.96604	-0.60485	0.69197	0.094156	0.95574
gelsolin	contig02567	0.43705	0.33654	0.46319	0.58133	0.74069	0.066452	0.55814	0.71151	0.32372	0.51253	0.32593	0.62554	0.51297	0.11583	0.5756	0.21859	-0.075461	0.9228	0.42787	0.56413	0.65172	0.041696	0.50023	0.44735	-0.48405	0.48667	0.31082	0.92936	-0.36869	0.72218	0.7285	0.12811
cysteine-rich motor neuron 1	contig02578	1.0712	0.030468	0.40553	0.71799	0.28747	0.64471	0.44215	0.96103	0.40784	0.49736	0.35757	0.67585	0.88869	0.023501	0.27661	0.74657	0.61166	0.27723	0.48536	0.60673	1.1505	0.0039043	0.1256	0.94695	0.67854	0.38671	0.50739	0.79128	0.32139	0.8645	0.82781	0.16854
dopamine beta hydroxylase-like protein	contig02581	0.5861	0.40651	0.7852	0.51947	0.75866	0.23291	0.52145	0.97305	0.90134	0.13689	0.63602	0.48685	1.2217	0.011041	0.90823	0.19022	0.57796	0.45299	0.5222	0.67633	1.165	0.015344	0.81004	0.40107	0.35066	0.84254	0.58961	0.82628	0.24713	0.94375	1.1228	0.11623
temptin [Haliotis discus discus]	contig02583	0.42741	0.39674	0.71198	0.38461	0.47755	0.31074	0.36778	0.97969	0.56722	0.20869	0.53915	0.37828	0.67553	0.051893	0.68597	0.16219	0.3096	0.61463	0.42326	0.61018	0.8027	0.019939	0.70956	0.24921	0.25594	0.83945	0.5256	0.66378	0.72572	0.25194	1.2784	0.010979
regulation of nuclear pre-mrna domain containing 2	contig02586	-0.31624	0.72862	0.5229	0.71067	-0.0098737	0.99282	0.18621	0.99997	0.55647	0.44846	-0.076741	0.96181	1.0294	0.037871	-0.023553	0.98827	0.79306	0.25945	0.38262	0.80349	1.0797	0.028857	0.27108	0.88012	0.16658	0.94423	0.02487	0.99936	-0.19839	0.95895	0.083304	0.96187
dynactin 3	contig02589	0.26148	0.54071	0.42857	0.53108	0.38627	0.28697	0.033712	0.99997	0.62065	0.055512	0.062427	0.94135	1.0855	0.00014871	0.23649	0.65159	0.40221	0.30231	-0.0085915	0.99426	0.99101	0.000518	-0.0060166	0.99685	-0.029549	0.98641	-0.29824	0.87519	-0.18928	0.90294	0.076071	0.92728
	contig02591	0.32121	0.34739	0.37166	0.54795	0.4545	0.13657	0.10179	0.99997	0.50692	0.083607	-0.0072449	0.99395	0.736	0.0023927	-0.0010339	0.99917	0.33137	0.3567	0.02832	0.98057	0.77553	0.0017001	-0.018406	0.9902	-0.19671	0.81287	-0.29514	0.82194	-0.0011595	0.99964	0.23382	0.63993
intracellular family	contig02609	0.72547	0.052921	0.42873	0.58143	0.73269	0.051132	0.09209	0.99997	0.59122	0.10687	-0.2101	0.76566	1.0397	0.00067903	-0.17017	0.80845	0.62799	0.1021	0.031347	0.98403	0.99573	0.0012209	0.26743	0.74862	-0.3431	0.66727	-0.036126	0.99936	-0.53685	0.38138	0.023608	0.98414
	contig02615	0.56685	0.28953	-0.13588	0.92324	0.41953	0.45311	-0.36831	0.99779	0.58374	0.25514	-0.31768	0.71454	0.71667	0.064714	-0.27061	0.74672	0.48595	0.4201	-0.57897	0.49196	0.79841	0.037757	-0.39151	0.69593	-0.032111	0.99008	-0.6409	0.59762	0.46527	0.69337	-0.1842	0.85834
	contig02621	0.077157	0.94668	-0.27462	0.85855	-0.06638	0.94571	-0.27299	0.99997	0.23416	0.79104	-1.1076	0.13684	0.18711	0.74121	-1.2704	0.039517	0.1393	0.89937	-1.164	0.14879	0.32631	0.53478	-0.43466	0.73653	-0.57892	0.6223	-0.548	0.85104	-0.11593	0.97659	-0.65911	0.41944
acidic mammalian chitinase	contig02653	-0.042621	0.96172	0.4842	0.59479	0.34226	0.5083	0.63115	0.6655	0.25119	0.676	0.69914	0.22092	0.45786	0.2049	0.57857	0.2681	0.31685	0.60706	0.59764	0.39895	0.68217	0.04999	0.72643	0.23778	0.25128	0.84256	0.18596	0.99936	0.1718	0.94552	0.40147	0.54903
	contig02663	0.094887	0.92962	0.77296	0.49053	-0.1171	0.89062	-0.02783	0.99997	0.2888	0.7145	-0.14432	0.91226	0.67363	0.13805	0.046524	0.97067	0.49867	0.49452	0.34567	0.80218	1.1148	0.012013	0.12501	0.95427	0.33081	0.83768	0.36175	0.96321	-0.56586	0.65742	0.45115	0.62014
dolichol kinase	contig02665	0.12004	0.7624	0.41128	0.41825	0.32909	0.23305	0.037322	0.99997	0.26877	0.35926	0.27511	0.48827	0.65402	0.0020252	0.52742	0.058491	0.39935	0.15013	0.43637	0.26905	0.64499	0.0025293	0.48736	0.16654	0.17711	0.80036	0.17023	0.96321	-0.0058402	0.999	0.3854	0.2432
extracellular serine-threonine rich protein	contig02667	0.32861	0.22458	0.22087	0.6971	0.39864	0.11817	-0.022952	0.99997	0.32107	0.22384	0.16136	0.72594	0.67885	0.00098975	0.4226	0.13138	0.31986	0.26342	0.23115	0.65082	0.76006	0.00040843	0.28826	0.50449	0.043704	0.97031	0.1414	0.98242	0.027852	0.98847	0.51172	0.080055
rh type c glycoprotein	contig02678	0.543	0.3478	-0.08806	0.95775	0.59829	0.27034	-0.17487	0.99997	0.54381	0.33123	-0.38327	0.6589	0.44826	0.29746	-0.24579	0.7938	0.28819	0.71095	-0.30717	0.80955	0.83577	0.03878	0.071896	0.97444	-0.47593	0.65814	0.31244	0.97131	0.0096207	0.99942	0.23257	0.81896
splicing arginine serine-rich 7	contig02684	0.77355	0.03513	0.62542	0.3468	0.66687	0.06899	0.38918	0.90249	0.68073	0.052468	0.38403	0.4879	0.73708	0.011284	0.44798	0.32269	0.7757	0.032685	0.54396	0.34541	0.99204	0.0010844	0.53938	0.32127	-0.03614	0.98423	0.33666	0.8607	-0.04818	0.9861	0.51305	0.27225
rab family gtpase	contig02686	0.22129	0.78221	0.58264	0.59053	0.44213	0.46432	0.47715	0.94922	0.27063	0.71301	0.75048	0.28458	0.98935	0.01662	0.86922	0.13236	0.53849	0.40081	0.70645	0.40479	0.98338	0.017365	0.67091	0.42612	-0.42643	0.72348	0.33291	0.96522	0.038071	0.99225	0.42278	0.61804
conserved Plasmodium protein	contig02688	-0.14911	0.88495	0.51652	0.6907	-0.16294	0.84654	0.73476	0.79689	-0.14536	0.88168	0.93371	0.22091	0.48002	0.33426	1.2435	0.042717	0.099476	0.92992	0.81042	0.38713	0.59762	0.21576	0.69419	0.47793	-0.35363	0.83451	0.38324	0.95964	-0.28043	0.92754	0.422	0.67302
	contig02691	0.22168	0.56704	0.10739	0.89524	0.30678	0.3559	0.034882	0.99997	0.34084	0.29175	-0.12677	0.83685	0.81374	0.00092446	0.035692	0.95863	0.19513	0.65645	-0.30558	0.59116	0.75876	0.0020263	0.026906	0.98441	-0.11844	0.91005	-0.12062	0.99936	-0.044918	0.98383	0.075859	0.91575
ca2+-dependent complex c1r c1s subunit	contig02701	2.1926	0.0022625	0.67583	0.65428	2.4501	0.0041601	0.80899	0.85345	2.6961	0.00022868	0.23616	0.87986	3.1824	3.3593e-06	0.38143	0.75689	2.76	0.00013122	0.27574	0.89965	2.5776	6.6924e-05	0.56829	0.69567	0.36381	0.88369	-0.18676	0.99936	0.81809	0.64271	-0.050211	0.98205
chymotrypsin c	contig02703	1.8514	0.26315	0.69621	0.81384	0.97587	0.62506	0.90971	0.99779	2.4597	0.097951	0.62015	0.78657	3.9647	0.0013803	0.21383	0.93948	2.3186	0.14739	0.65895	0.83519	2.804	0.020011	0.90756	0.72533	0.19211	0.97307	-0.36486	0.99936	1.0174	0.76585	0.10562	0.97422
acid phosphatase lysophosphatidic	contig02705	0.57674	0.318	0.063241	0.97292	0.31215	0.6283	-0.34576	0.99997	0.39972	0.53269	-0.2432	0.81198	1.0214	0.012604	-0.90561	0.10846	0.62681	0.28889	-0.41967	0.70331	0.72891	0.07756	-0.48387	0.62355	0.057689	0.9821	-1.3774	0.063337	-0.022601	0.99645	-1.1942	0.042177
elegans protein confirmed by transcript evidence	contig02711	-0.094365	0.87661	0.27174	0.73472	0.15967	0.73138	-0.07438	0.99997	0.29832	0.47551	-0.033299	0.97141	0.85631	0.0022884	-0.36506	0.425	0.24063	0.62876	0.2355	0.77845	0.63972	0.020641	0.018801	0.9908	0.46319	0.41112	0.068289	0.99936	0.098801	0.96558	-0.27373	0.63423
inorganic pyrophosphatase	contig02719	0.8756	0.1189	0.57899	0.61551	1.1314	0.041562	0.6246	0.86091	0.69882	0.22247	0.45741	0.61232	0.82346	0.061081	0.37863	0.65876	0.45865	0.53447	0.42407	0.72458	0.79231	0.071174	0.45113	0.68872	0.82934	0.30896	0.25051	0.99869	0.5605	0.65423	0.5491	0.497
	contig02723	2.6701	0.01049	0.49854	0.85678	1.9412	0.065453	-0.030197	0.99997	2.9812	0.0031312	-0.17495	0.94682	3.8376	3.43e-05	-0.15201	0.95084	3.4029	0.0012978	0.23951	0.95227	3.3929	0.00021098	0.10677	0.98276	2.022	0.14886	-0.326	0.99936	2.6706	0.032907	-0.1854	0.94618
	contig02726	1.6243	0.060494	0.8351	0.60213	1.5506	0.070971	0.53381	0.99997	1.8027	0.026283	0.66815	0.59014	2.1534	0.0019256	0.036035	0.98465	2.1568	0.011042	0.553	0.75329	1.8037	0.008474	0.64189	0.6805	0.82101	0.64136	-0.0070774	0.99997	0.19192	0.97192	0.12292	0.95198
	contig02728	1.5029	0.10145	0.91151	0.62926	1.6957	0.087374	0.63612	0.99997	1.4507	0.10006	0.53573	0.74811	1.6856	0.018341	0.2602	0.89577	1.5066	0.10484	0.51954	0.82068	1.4864	0.037558	0.30321	0.91823	0.7199	0.68161	-0.46817	0.97852	0.70519	0.74962	-0.37678	0.81371
conserved domain protein	contig02741	-2.2989	0.0068639	-2.5992	0.034245	-1.7318	0.043514	-2.6598	0.016966	-1.9112	0.01686	-3.58	0.00019521	-2.7448	0.00014017	-3.2689	0.00034366	-2.2632	0.0074532	-3.4276	0.00028197	-2.4406	0.00063416	-3.2941	0.00052955	-1.8635	0.083283	-2.2282	0.069198	-2.5237	0.0079275	-2.6406	0.0078333
nucleobindin 2	contig02769	0.56668	0.30856	-0.032657	0.98469	0.27789	0.66133	0.37169	0.99779	0.51918	0.34799	-0.042612	0.97498	0.78292	0.049594	0.38098	0.60771	1.0251	0.038546	-0.088609	0.96419	0.3504	0.41835	0.037737	0.98694	0.13941	0.94248	-0.26495	0.98858	0.44878	0.73555	-0.25379	0.793
nucleobindin 2b	contig02771	0.61863	0.22551	0.34992	0.74885	0.51124	0.32555	0.18773	0.99997	0.5076	0.33301	0.031448	0.98077	1.169	0.0023231	0.064068	0.95335	0.57447	0.2943	0.095353	0.95963	0.84814	0.02492	0.12816	0.94297	0.59106	0.46341	0.032047	0.99936	0.20793	0.9364	0.5324	0.42134
	contig02777	0.37807	0.27722	0.23041	0.75152	0.5196	0.10237	0.063181	0.99997	0.40442	0.22043	-0.098811	0.89031	0.9994	0.00017732	-0.01088	0.98951	0.33233	0.38907	0.30381	0.61913	0.87027	0.00094519	0.085222	0.94297	-0.12094	0.91377	0.2139	0.95604	-0.082874	0.96809	0.41828	0.31176
	contig02779	0.25134	0.4926	0.24705	0.71726	0.33342	0.30383	-0.036299	0.99997	0.30533	0.36176	-0.065722	0.9274	0.74729	0.0019823	0.25861	0.54307	0.30884	0.40283	0.056748	0.96255	0.85701	0.00065036	-0.012374	0.99242	-0.015751	0.99196	-0.079518	0.99936	-0.024498	0.99189	0.18731	0.73042
mitochondrial 28s ribosomal protein s6	contig02781	-0.048039	0.94288	0.41061	0.558	0.26639	0.50737	0.092655	0.99997	0.33511	0.38361	-0.010595	0.99158	0.72769	0.0070857	0.43835	0.28494	0.23919	0.61972	-0.042178	0.976	0.83005	0.0026112	0.16679	0.86008	0.16596	0.87592	-0.10573	0.99936	-0.10499	0.9616	0.17812	0.78564
protein tyrosine phosphatase isoform b	contig02789	1.3654	0.0089009	0.20168	0.88925	1.2535	0.020462	-0.12256	0.99997	1.2781	0.0097778	0.052712	0.96948	1.6513	0.00018661	0.062615	0.95863	1.3637	0.0087851	0.027053	0.98867	1.6504	0.00027441	0.10584	0.95996	-0.44869	0.70323	-0.11764	0.99936	-0.30711	0.89237	0.045426	0.97774
factor 8-associated gene a	contig02795	0.83496	0.018057	-0.16728	0.85738	0.76215	0.033491	-0.14306	0.99997	0.61488	0.072454	-0.36315	0.49982	1.0003	0.00060167	-0.13889	0.84384	0.32389	0.48182	-0.012971	0.99151	1.067	0.00040775	-0.067122	0.96338	-0.17415	0.87502	0.14035	0.99936	-0.14396	0.94375	0.40431	0.40875
immunoglobulin kappa light chain	contig02799	1.1182	0.028855	-0.14509	0.92162	0.96365	0.060495	0.3726	0.99779	1.1965	0.012668	-0.61514	0.39616	1.3822	0.00092701	-0.71585	0.23261	0.99858	0.051128	-0.65517	0.4417	1.2285	0.0030045	-0.50271	0.59616	0.42149	0.72136	-0.36815	0.9433	0.29938	0.89237	0.12048	0.92273
	contig02801	0.32598	0.6765	0.39354	0.76663	1.1666	0.040069	0.16622	0.99997	0.34652	0.64699	-0.14215	0.91438	0.506	0.28469	0.18312	0.87812	0.50241	0.49409	0.65431	0.50649	1.0706	0.016361	0.48684	0.66403	0.4942	0.69184	-0.02888	0.99936	0.18624	0.95619	0.27418	0.80344
protein memo1	contig02803	0.76527	0.025003	0.13681	0.88255	0.78773	0.024272	-0.10377	0.99997	0.65405	0.044612	-0.38136	0.45069	1.1446	9.1496e-05	-0.55807	0.14328	0.50475	0.16727	-0.20358	0.8137	1.1851	0.00010533	-0.15154	0.87728	-0.28435	0.7177	0.15642	0.99869	-0.1147	0.95557	0.39705	0.39707
saccharopine dehydrogenase domain-containing protein	contig02805	0.50886	0.18535	0.16046	0.8687	0.66612	0.068117	0.13583	0.99997	0.44066	0.25387	0.012481	0.99015	0.87742	0.0027628	0.17626	0.79357	0.20296	0.7165	0.44011	0.48618	0.85558	0.0036586	0.10824	0.93415	-0.059529	0.97278	0.36331	0.8108	-0.15087	0.9432	0.54893	0.2288
	contig02831	1.1463	0.11302	-0.78923	0.59231	0.85956	0.25075	0.14006	0.99997	1.1327	0.10334	-0.071172	0.96937	1.1591	0.039899	-0.11997	0.94325	1.2858	0.07413	-0.0017405	0.99917	1.2022	0.032455	-0.43835	0.79975	-0.078105	0.9821	-0.11135	0.99936	-0.094042	0.9861	-0.33901	0.80823
gpn-loop gtpase 3	contig02837	0.16678	0.76115	0.3214	0.69228	0.28855	0.50097	0.0069931	0.99997	0.37923	0.34645	-0.048617	0.95912	0.84632	0.0036472	0.19797	0.75639	0.22498	0.67512	-0.013132	0.99158	0.84148	0.0040824	0.015579	0.99208	-0.10978	0.93622	-0.063745	0.99936	-0.43384	0.53624	0.29497	0.61812
	contig02843	2.0011	0.0058554	-0.27747	0.88915	0.94437	0.20863	0.19511	0.99997	1.5179	0.026118	-0.58012	0.62828	2.0671	0.00051847	-0.56388	0.59579	1.1488	0.12864	-0.51131	0.76164	2.0325	0.00076191	-0.39233	0.83377	0.20146	0.94248	-0.045918	0.99936	0.88606	0.50958	0.28502	0.84913
	contig02849	0.95642	0.025348	0.21626	0.84428	0.90328	0.036773	0.73395	0.45583	0.51163	0.26135	0.73795	0.17968	0.76912	0.02371	1.1326	0.010816	0.022492	0.98044	0.70398	0.27721	0.76407	0.024584	0.88666	0.10554	-0.46178	0.56396	1.1014	0.078861	-0.73971	0.22664	1.5029	0.0034297
	contig02851	0.40589	0.13753	0.35899	0.50228	0.58055	0.030827	0.499	0.35239	0.24515	0.42792	0.13665	0.78908	0.51108	0.015318	0.46995	0.10544	0.072509	0.88089	0.27698	0.57401	0.58314	0.0060723	0.3355	0.43657	-0.11826	0.88996	0.17512	0.95964	-0.060294	0.97192	0.69819	0.02091
sporulation-induced transcript 4-associated protein sapla	contig02855	-0.12695	0.91437	0.72203	0.5822	-0.05047	0.96206	0.68255	0.88678	0.82868	0.20539	0.1822	0.90032	0.52783	0.32597	0.95904	0.18377	1.3152	0.035649	0.4523	0.75616	0.30864	0.5916	0.62746	0.58941	0.15099	0.95367	0.14501	0.99936	-0.050895	0.99213	0.021764	0.99106
#NAME?	contig02885	0.11244	0.86084	0.37931	0.63434	0.30518	0.49207	-0.0039436	0.99997	0.56803	0.13253	-0.14937	0.85199	1.0035	0.0011121	-0.12987	0.8689	0.54174	0.18494	-0.17281	0.87391	0.96137	0.0018914	0.0099114	0.99565	0.14377	0.91453	-0.2304	0.97234	-0.33593	0.74226	-0.0039931	0.99702
	contig02889	1.1267	0.23841	-1.3917	0.41665	2.013	0.026213	-1.1372	0.77932	0.88372	0.37743	-1.179	0.40458	1.2024	0.092313	-0.6237	0.64839	0.55433	0.67019	-1.5439	0.23435	1.3194	0.097921	-0.80086	0.64349	-1.3804	0.28649	-0.12661	0.99936	-0.23662	0.96713	0.43153	0.80393
ccr4-not transcription subunit 3	contig02909	0.25934	0.67287	0.075246	0.9591	0.77263	0.082587	-0.3454	0.99651	0.41274	0.4222	0.0042741	0.99741	1.1779	0.0010979	0.05199	0.95894	0.62805	0.19139	0.018629	0.9902	1.2075	0.0010201	0.020833	0.99196	0.17608	0.90984	0.137	0.99936	-0.12774	0.96554	0.31862	0.67646
GK12566 [Drosophila willistoni]	contig02917	0.30821	0.3502	-0.0062173	0.99503	0.21982	0.52412	-0.41704	0.66851	0.27876	0.40195	-0.29079	0.51244	0.73778	0.0016639	-0.49508	0.12096	0.17117	0.69413	-0.34271	0.49687	0.68031	0.0036614	-0.2486	0.66947	-0.29333	0.60416	-0.1621	0.98246	0.13402	0.93122	0.039077	0.96139
leukocyte cell derived chemotaxin 1	contig02942	0.34099	0.61886	-0.69989	0.49831	0.474	0.41645	-0.72239	0.69346	-0.31855	0.64412	-1.1448	0.075496	0.19643	0.68607	-1.8162	0.00082671	-0.010664	0.99201	-1.0555	0.13101	0.42502	0.32903	-1.2542	0.047841	-0.97195	0.15602	-0.51332	0.80899	-0.34583	0.85427	-0.58638	0.40814
28s ribosomal protein mitochondrial	contig02946	0.3486	0.50778	0.0092318	0.99503	0.20325	0.7172	-0.0085814	0.99997	0.39411	0.42537	-0.28428	0.70978	0.71536	0.034507	-0.10298	0.91407	-0.055524	0.94832	-0.11255	0.9422	0.76641	0.023121	-0.19436	0.87137	-0.0013068	0.99918	-0.19282	0.99869	-0.047069	0.98847	0.11131	0.91114
calcium-activated potassium channel	contig02948	0.58891	0.43459	0.67835	0.61153	0.63763	0.36565	0.37787	0.99997	1.4511	0.015032	0.21681	0.87695	2.3078	3.6959e-05	0.59818	0.49206	1.6759	0.0079756	0.2094	0.92184	1.9663	0.0003161	0.37558	0.81299	0.55938	0.69184	-0.06032	0.99936	0.39774	0.87539	-0.13216	0.933
potassium intermediate small conductance calcium-activated subfamily member 3	contig02949	0.85223	0.1019	0.60409	0.56861	0.70195	0.18147	0.30424	0.99997	1.0336	0.032635	0.14119	0.90489	1.8016	5.2055e-05	0.74471	0.20692	1.0683	0.035069	0.46828	0.64966	1.6143	0.00026158	0.34779	0.76764	0.2829	0.85106	0.42783	0.90162	0.43348	0.76924	0.4659	0.5538
	contig02955	0.14585	0.71933	0.13749	0.84977	0.18621	0.58571	-0.010737	0.99997	0.35346	0.22826	-0.012941	0.98625	0.58201	0.0089954	-0.28679	0.44074	0.28749	0.4064	-0.092253	0.92196	0.47609	0.032373	0.10888	0.89844	-0.20576	0.7687	0.020767	0.99936	0.19952	0.84002	0.45505	0.18662
	contig02962	0.48568	0.44566	0.34657	0.78909	0.54897	0.35197	-0.055609	0.99997	0.86441	0.099139	0.043003	0.97668	1.268	0.0031442	-0.42309	0.58906	0.91448	0.096148	0.19739	0.90874	1.1849	0.0057058	-0.082652	0.97161	0.23518	0.89265	-0.57712	0.75496	0.52243	0.68532	-0.33865	0.72648
janus kinase and microtubule-interacting protein 2-like	contig02963	0.69956	0.11127	0.16579	0.88849	0.6266	0.15326	0.021227	0.99997	0.60059	0.16987	-0.32772	0.65367	0.76822	0.024514	-0.45742	0.41551	0.65374	0.15047	-0.27826	0.79021	0.86212	0.011797	-0.049466	0.97999	-0.13662	0.9329	-0.53251	0.64904	0.69518	0.27809	-0.14196	0.87993
	contig02964	0.36721	0.39214	-0.045311	0.97296	0.23181	0.6132	-0.18866	0.99997	0.12628	0.82826	-0.32944	0.58037	0.55536	0.061258	-0.50284	0.2529	0.39802	0.37303	-0.33746	0.65338	0.59175	0.044696	-0.37619	0.57674	0.11091	0.93722	-0.53002	0.53769	0.39905	0.62048	-0.17148	0.81635
viral a-type inclusion protein	contig02965	0.42638	0.47471	0.46563	0.66544	0.94055	0.057785	0.60331	0.82142	0.97209	0.037741	0.50869	0.49602	1.5549	0.00018049	0.69697	0.22639	1.2704	0.0091653	0.73682	0.3416	1.5514	0.00027211	0.7227	0.32381	0.62461	0.44669	0.31455	0.96549	0.025385	0.99542	0.37473	0.65109
hyaluronan-mediated motility receptor	contig02966	0.28818	0.52215	0.22591	0.79442	0.66434	0.066019	0.037933	0.99997	0.24216	0.60876	0.16331	0.82031	0.71639	0.012318	0.55261	0.1787	0.12351	0.84542	0.22725	0.79884	0.7302	0.010989	0.22996	0.79132	0.050316	0.97815	0.31194	0.88692	0.31142	0.759	0.62114	0.15416
rio kinase 2	contig02969	0.49365	0.61469	-0.036125	0.98695	0.98555	0.19668	0.32409	0.99997	0.47128	0.5773	0.027908	0.9875	1.3663	0.0094025	0.25894	0.84342	1.1528	0.089336	0.46206	0.76502	0.95138	0.071957	0.67318	0.57355	0.11361	0.97068	0.30013	0.99869	-0.24229	0.94986	0.26366	0.84712
tetraspanin 74f	contig02971	1.1874	0.0089009	-0.066819	0.96659	0.8651	0.059496	-0.056154	0.99997	1.1918	0.0056412	-0.25588	0.76744	1.113	0.002455	-0.29397	0.69128	0.63771	0.20036	-0.32168	0.76312	1.1601	0.0019045	-0.26458	0.8192	-0.058549	0.97971	-0.026104	0.99936	-0.27309	0.88936	0.53158	0.39614
a chain structures of glycogen phosphorylase-inhibitor complexes and the implications for structure-based drug design	contig02972	0.88138	0.15518	-0.20788	0.8976	0.48934	0.48379	-0.13369	0.99997	0.54569	0.4339	-0.17824	0.89637	1.0497	0.026708	-0.67145	0.37793	0.68565	0.3261	-0.49859	0.69113	0.29422	0.58779	-0.64814	0.53341	-0.23636	0.91005	-0.14738	0.99936	-0.48169	0.79848	0.057806	0.9748
	contig02974	0.028671	0.98648	0.13788	0.95726	0.3419	0.7462	-0.23099	0.99997	0.25005	0.84062	-1.2767	0.21149	-0.12422	0.87795	-1.7963	0.028674	0.11542	0.94048	-0.30192	0.91746	0.36329	0.61362	-0.33029	0.88593	-0.62869	0.73244	0.18674	0.99936	-0.59216	0.82215	0.47548	0.73958
	contig02976	0.4541	0.33138	0.26075	0.79406	0.40397	0.38324	-0.026954	0.99997	0.31162	0.5492	-0.19278	0.81485	0.49865	0.13923	-0.1249	0.88981	0.2068	0.75508	-0.28781	0.76802	0.71058	0.030648	-0.011671	0.99548	-0.095644	0.95627	-0.11393	0.99936	-0.10452	0.96938	-0.27512	0.70988
menin isoform 1	contig02986	0.50124	0.049141	0.25145	0.64163	0.20964	0.47962	0.13997	0.99997	0.21585	0.47905	0.11471	0.82086	0.36279	0.074901	0.20559	0.57692	0.22797	0.49122	0.25543	0.59586	0.55929	0.0059067	0.30378	0.47332	-0.76617	0.012075	0.20752	0.91175	-0.60057	0.055146	0.33262	0.31704
hydroxymethylbilane synthase	contig02987	0.90917	0.072629	0.14978	0.91764	1.1729	0.022593	0.2671	0.99997	0.45572	0.43779	-0.10569	0.92972	0.97228	0.014545	0.12322	0.91234	0.57549	0.32713	-0.18889	0.90658	1.0719	0.0074323	0.095593	0.96317	-0.17936	0.92216	-0.40835	0.91302	-0.2585	0.91677	0.22383	0.82463
tyrosyl-dna phosphodiesterase 1	contig02989	0.24181	0.50041	0.27987	0.65602	0.55038	0.060061	0.013721	0.99997	0.17341	0.66298	0.27153	0.55396	0.42602	0.068357	0.42916	0.2013	0.086285	0.86952	0.064884	0.95337	0.54909	0.017602	0.29703	0.57355	-0.15946	0.85335	0.25511	0.88084	0.082153	0.96558	0.55244	0.10779
bactericidal permeability increasing protein	contig02990	1.1973	0.23476	0.51642	0.82719	0.70436	0.52784	0.14116	0.99997	1.6394	0.069518	0.060308	0.98117	2.3628	0.0018166	0.10677	0.9601	2.006	0.030692	0.65801	0.76384	1.7921	0.016006	0.17379	0.96338	0.3251	0.93443	-0.066562	0.99936	0.78413	0.82362	0.24891	0.90921
chromosome 5 open reading frame 35	contig02992	0.16228	0.7357	-0.077571	0.93665	0.086834	0.85578	-0.23974	0.99779	0.50374	0.1186	-0.48297	0.26808	0.88065	0.00093585	-0.53931	0.13668	0.38363	0.30973	-0.19045	0.81837	0.49634	0.056307	-0.39638	0.46393	0.28782	0.69065	-0.51762	0.4398	0.2192	0.85482	-0.48056	0.24088
	contig02998	0.15596	0.74695	0.21828	0.77699	0.46218	0.16286	-0.018776	0.99997	0.18076	0.68648	0.18337	0.7647	0.6064	0.018161	0.46576	0.2143	0.17413	0.72832	0.1841	0.82668	0.64366	0.012326	0.27301	0.67732	0.0042833	0.99683	0.18702	0.97855	0.11653	0.9523	0.43961	0.29368
basic leucine zipper and w2 domains 1	contig02999	0.38537	0.21603	0.1438	0.8492	0.47983	0.10223	-0.039411	0.99997	0.24629	0.4837	-0.065033	0.92588	0.69732	0.0029793	0.10837	0.85416	0.17503	0.68845	-0.035898	0.97651	0.71137	0.0027065	-0.017552	0.99029	-0.25985	0.68669	-0.005895	0.99988	-0.13977	0.92835	0.42457	0.24918
	contig03001	0.75846	0.010307	0.51402	0.33706	0.83866	0.0087684	0.19867	0.99997	0.76303	0.0064852	0.20355	0.6991	0.98655	0.00010347	0.35915	0.33102	0.57709	0.053184	0.2362	0.71253	1.1522	3.6112e-05	0.20418	0.76461	-0.29963	0.6088	-0.052306	0.99936	-0.29276	0.68188	0.37806	0.33819
spectrin beta chain	contig03006	0.063831	0.95566	0.50633	0.68653	1.043	0.0661	0.42376	0.99779	0.51372	0.43896	-0.058412	0.96861	0.86729	0.055623	-0.30388	0.76048	0.46679	0.54226	-0.11675	0.95838	0.92563	0.039617	0.037703	0.98912	0.32992	0.8415	-0.22351	0.99936	0.63828	0.58341	-0.13478	0.92121
mms19 nucleotide excision repair homolog ( cerevisiae)	contig03013	0.23656	0.36721	0.094803	0.8777	0.36983	0.10719	-0.0066381	0.99997	0.31773	0.17131	-0.21175	0.55621	0.6755	0.00036334	-0.074463	0.87812	0.20887	0.481	-0.055079	0.94897	0.71868	0.00027143	-0.022171	0.98315	-0.089296	0.9103	-0.093057	0.99936	0.055527	0.9705	0.16706	0.66791
	contig03015	0.15949	0.68847	0.030085	0.97661	0.22147	0.50952	-0.11098	0.99997	0.25716	0.43856	-0.21388	0.65715	0.52796	0.01883	-0.11889	0.82828	0.21291	0.5905	0.0080996	0.99298	0.55553	0.013572	-0.076007	0.94329	-0.08354	0.93827	-0.065799	0.99936	-0.029671	0.98889	0.1375	0.80482
proteasome ( macropain) 26s non- 10	contig03022	0.29142	0.33837	0.35814	0.5108	0.37974	0.1689	-0.081478	0.99997	0.23859	0.4545	0.063896	0.9198	0.62081	0.0039849	0.21899	0.57535	0.048637	0.92512	-0.04436	0.96614	0.62555	0.0039869	0.14182	0.84265	-0.15697	0.8415	0.022583	0.99936	-0.3293	0.51228	0.35606	0.31151
nuclear pore complex protein nup50	contig03023	0.30581	0.27786	0.22288	0.69919	0.44293	0.085596	-0.0099258	0.99997	0.36018	0.16649	0.0035303	0.99644	0.52053	0.010559	0.091665	0.86304	0.25366	0.43043	0.16738	0.78846	0.56735	0.0057334	0.14772	0.82098	0.031854	0.98063	-0.014089	0.99936	-0.2163	0.77296	0.22542	0.5742
caspase apoptosis-related cysteine peptidase	contig03026	1.14	0.32811	0.34778	0.92771	1.0414	0.3639	0.23731	0.99997	0.70468	0.60143	0.79837	0.74202	1.7442	0.034491	0.54917	0.82828	0.93547	0.48821	0.74051	0.82835	1.2085	0.15198	0.92053	0.7557	0.21472	0.95537	0.73457	0.92203	0.29672	0.95869	1.0389	0.41976
cell division cycle 16 homolog	contig03027	-0.32111	0.50084	0.21172	0.82897	0.016852	0.98029	-0.25859	0.99997	0.47759	0.24194	-0.37763	0.52907	0.96837	0.0019505	0.12932	0.87455	0.56248	0.17682	0.038888	0.97987	0.87306	0.0050177	-0.067498	0.96582	0.66973	0.21446	-0.32188	0.90537	0.10052	0.96809	-0.19274	0.79814
hydroxysteroid (17-beta) dehydrogenase 7	contig03028	0.48133	0.20236	-0.11089	0.91172	0.6473	0.068981	0.014222	0.99997	0.56929	0.10311	-0.20731	0.75574	0.8133	0.004248	-0.0021661	0.99882	0.59712	0.10345	0.21945	0.8031	0.75866	0.0075771	0.13886	0.89726	0.24568	0.79016	0.20604	0.97852	0.16547	0.92984	0.19958	0.76517
proteasome ( macropain) 26s non- 3	contig03030	0.38858	0.2221	0.39416	0.51233	0.48877	0.10209	0.055578	0.99997	0.52357	0.067817	-0.004111	0.99644	0.85364	0.00050335	0.11108	0.85318	0.5222	0.086459	0.23134	0.7215	0.75003	0.0020326	0.26378	0.65133	-0.014471	0.99263	0.23337	0.92331	0.045967	0.98254	0.28483	0.52398
	contig03032	-0.19037	0.8184	0.89802	0.33355	0.42404	0.48288	0.26995	0.99997	0.51466	0.37743	0.84224	0.21051	0.94732	0.020758	0.49479	0.48221	0.79547	0.14336	0.81659	0.29809	0.47473	0.27099	0.53333	0.56528	0.71661	0.46251	0.041601	0.99936	0.38642	0.8551	0.11735	0.92589
rho gtpase activating protein 20	contig03034	-0.15342	0.93539	-0.34886	0.93684	0.06915	0.97156	-1.2903	0.94155	0.22999	0.88971	-0.82433	0.76714	0.35138	0.70572	-0.85777	0.70749	0.68643	0.62229	-0.88567	0.79413	0.21489	0.84436	-0.61831	0.87579	-0.035636	0.99466	-1.3037	0.68256	-0.25328	0.96809	-2.5135	0.04785
protein disulfide isomerase-associated 3 precursor	contig03037	0.40413	0.4143	0.41503	0.64573	0.53106	0.2314	0.38095	0.95642	0.44123	0.34602	0.18942	0.82217	1.0998	0.0013386	0.17374	0.83344	0.44862	0.38081	0.2424	0.82358	0.93825	0.0056155	0.14343	0.91731	0.052341	0.98063	-0.090212	0.99936	0.15964	0.94784	0.27327	0.71965
	contig03039	0.48555	0.25063	0.30739	0.73112	0.80509	0.041057	0.35424	0.95336	0.55623	0.1581	0.066359	0.94552	0.96456	0.0021323	0.11067	0.89815	0.26739	0.63081	0.15646	0.89644	0.87684	0.0050573	0.049965	0.97713	-0.10366	0.94452	0.0621	0.99936	0.15511	0.94427	0.59334	0.22085
rna binding motif protein 25	contig03042	0.44061	0.35147	0.67476	0.39035	0.57242	0.17923	0.38214	0.94665	0.33025	0.51875	0.31105	0.66079	0.80187	0.014958	0.55782	0.25851	0.50517	0.28828	0.60229	0.36127	0.72681	0.027374	0.60861	0.32381	-0.036056	0.98647	0.49237	0.68401	0.23342	0.90217	0.61921	0.23402
flj46154 protein	contig03043	0.48118	0.085997	-0.13381	0.85349	0.52548	0.058633	-0.17131	0.99997	0.32755	0.2655	-0.60317	0.080649	0.73097	0.0011457	-0.33872	0.32037	0.35932	0.2458	-0.21962	0.71192	0.64725	0.003698	-0.25118	0.63935	-0.14109	0.86755	-0.082317	0.99936	0.19116	0.84677	-0.09685	0.87008
novel protein containing sea domains	contig03044	0.45119	0.21321	0.40813	0.56371	0.7383	0.031948	0.20798	0.99997	0.40201	0.2669	0.14952	0.82602	0.85628	0.0018183	0.41482	0.32323	0.18751	0.71967	0.29638	0.67445	0.82716	0.0027162	0.21924	0.78743	-0.32826	0.63537	0.16932	0.99573	-0.060386	0.98028	0.57942	0.15967
tetraspanin-1 (tspan-1)	contig03049	1.2206	0.0077488	0.27254	0.81057	0.23245	0.69705	0.060208	0.99997	0.64072	0.16987	0.037552	0.97658	0.82812	0.023058	0.063261	0.95269	0.84387	0.069566	0.1492	0.924	1.1734	0.0018112	0.20396	0.877	-0.86545	0.15695	0.11964	0.99936	-0.65442	0.38983	0.32857	0.67805
	contig03050	0.032153	0.96611	0.073201	0.95177	0.36079	0.38971	-0.1176	0.99997	0.4556	0.24876	-0.1997	0.78029	0.78267	0.0084764	0.23946	0.69365	0.4683	0.26985	0.022113	0.98736	0.76263	0.010457	-0.080409	0.95687	0.60369	0.26032	-0.25732	0.95082	0.23485	0.87466	-0.38037	0.48604
	contig03056	0.4195	0.33238	0.29092	0.74159	0.69218	0.071328	0.070923	0.99997	0.38579	0.37206	0.025851	0.98021	0.87123	0.0044925	0.25639	0.6743	0.39113	0.41041	0.0974	0.94474	0.76533	0.012137	0.22981	0.81158	0.087725	0.95648	0.29104	0.93292	-0.094183	0.96995	0.64081	0.17065
rar-related orphan receptor paralog b	contig03059	-0.0805	0.88103	0.48434	0.41261	0.33213	0.31943	0.21765	0.99997	0.2378	0.53243	0.55474	0.15521	0.62008	0.010916	0.81842	0.010101	0.15234	0.7562	0.43035	0.38044	0.69957	0.0045899	0.56195	0.17492	0.19538	0.81867	0.094362	0.99936	-0.11904	0.94649	0.33771	0.43102
endonuclease-reverse transcriptase	contig03061	0.059984	0.91855	0.39333	0.53328	0.15645	0.69924	0.41755	0.74526	-0.25524	0.5002	0.15845	0.79283	0.10766	0.71726	0.40514	0.27893	-0.38988	0.26867	0.30826	0.602	0.22005	0.41429	0.2892	0.62738	-0.49645	0.26679	0.34271	0.74218	-0.53624	0.22768	0.72381	0.041703
fgfr1 oncogene partner 2	contig03064	-0.62507	0.41089	-0.30199	0.86024	0.028006	0.98056	-0.39543	0.99997	-0.76239	0.27166	0.034329	0.98436	-1.236	0.016613	-0.056522	0.96982	-0.53391	0.54419	-0.052538	0.98446	-0.80076	0.12852	0.081587	0.97755	0.23059	0.92318	-0.13782	0.99936	0.57153	0.74934	0.28819	0.82664
aldolase	contig03065	0.11109	0.86699	0.6025	0.42307	0.44125	0.29244	-0.072415	0.99997	0.67582	0.071972	-0.19082	0.80163	0.8177	0.0082349	-0.25453	0.68538	0.60547	0.13925	0.094065	0.9489	0.80769	0.0092323	0.18284	0.86623	0.47494	0.47716	-0.22626	0.97852	0.45655	0.55076	-0.047375	0.96661
	contig03066	0.04342	0.93845	0.15149	0.83858	0.27713	0.39222	-0.176	0.99997	0.23797	0.49756	-0.019279	0.98044	0.46787	0.041845	0.09294	0.87979	0.12806	0.78721	0.00076593	0.99917	0.59732	0.0093766	0.11087	0.90029	-0.065008	0.95829	-0.026468	0.99936	0.066076	0.97192	0.28589	0.50283
GK18160 [Drosophila willistoni]	contig03076	0.62993	0.06815	0.39321	0.58183	0.56202	0.10234	0.25985	0.99779	0.18249	0.70461	0.20088	0.75376	0.57316	0.035363	0.5934	0.11393	0.073617	0.91168	0.28181	0.69825	0.62999	0.020354	0.40491	0.48229	-0.31318	0.67052	0.46034	0.58901	-0.30362	0.74372	0.89182	0.022342
alport mental midface hypoplasia and elliptocytosis chromosomal gene 1	contig03079	0.25632	0.53444	0.14474	0.86777	0.46907	0.16156	-0.050396	0.99997	0.29331	0.44714	-0.26422	0.62653	0.77195	0.0032922	0.073867	0.92148	0.1642	0.75361	-0.078258	0.94958	0.86205	0.0013923	-0.12437	0.90251	-0.15316	0.88197	0.030102	0.99936	-0.16565	0.92097	0.28556	0.57968
predicted protein [Nematostella vectensis]	contig03081	0.41676	0.25522	0.36958	0.59941	0.54779	0.10527	-0.028956	0.99997	0.32692	0.39444	0.44924	0.33225	0.64179	0.016272	0.52452	0.16945	0.16986	0.75099	0.2387	0.76062	0.64218	0.016263	0.43075	0.43014	-0.18187	0.85466	0.12625	0.99936	-0.0091596	0.99854	0.51879	0.21461
structural maintenance of chromosomes 2	contig03088	0.28535	0.68811	0.35481	0.76657	0.22138	0.74569	0.32566	0.99997	0.65219	0.21563	0.21097	0.83967	0.97835	0.014911	0.37363	0.6245	0.97494	0.055131	0.69046	0.40127	1.1661	0.0042511	0.56069	0.52009	-0.046008	0.98562	0.26847	0.98858	-0.24448	0.92648	0.32662	0.72089
structural maintenance of chromosomes 2	contig03089	0.5056	0.27983	0.43032	0.62984	0.24075	0.656	0.32865	0.99651	0.44654	0.34247	0.35579	0.6122	0.73483	0.029696	0.42756	0.45299	0.66945	0.13336	0.68286	0.28894	0.86993	0.010223	0.64737	0.29802	-0.19826	0.88275	0.21943	0.99203	-0.56461	0.44818	0.21479	0.79446
cartilage matrix protein	contig03094	0.16871	0.77265	0.35218	0.67598	0.53734	0.17132	-0.18324	0.99997	0.21067	0.6927	-0.47069	0.38302	0.61367	0.044678	-0.1476	0.84786	0.4405	0.32604	-0.3265	0.68016	0.86248	0.0050699	-0.19592	0.85049	0.21548	0.84782	0.038499	0.99936	0.30298	0.80735	-0.0080218	0.99464
eater	contig03100	0.4559	0.27208	0.076171	0.94971	0.38787	0.35277	-0.31189	0.98796	0.28841	0.54193	-0.32593	0.59658	0.46452	0.13106	-0.21869	0.7339	0.10597	0.87733	-0.1413	0.90724	0.674	0.024799	-0.056666	0.97266	-0.2958	0.74238	0.17143	0.99869	-0.057138	0.98346	0.44434	0.39172
	contig03103	-0.074696	0.9364	-0.22418	0.86027	-0.16949	0.80293	-0.53376	0.87616	0.44112	0.43598	-0.64799	0.33006	0.59319	0.13146	-1.073	0.034243	0.28403	0.6969	-0.7215	0.34348	0.8078	0.03545	-0.59852	0.44931	-0.61374	0.44553	-0.11451	0.99936	-0.55215	0.5733	-0.065636	0.96118
thioester-containing protein-f	contig03107	0.61558	0.052751	0.474	0.44881	0.59125	0.062146	-0.053202	0.99997	0.4411	0.16987	-0.063235	0.9349	1.0076	0.00015967	0.078526	0.91148	0.37431	0.30518	0.26387	0.69143	0.86344	0.00099704	0.069394	0.95559	-0.029052	0.98542	-0.18834	0.97695	0.23255	0.83034	-0.036447	0.96916
	contig03109	0.37153	0.34349	-0.0071407	0.99503	0.33566	0.3865	0.28316	0.99093	0.37741	0.3169	-0.1031	0.89669	0.73408	0.0076687	0.46466	0.25892	0.65791	0.058981	0.11141	0.92527	0.45721	0.10078	-0.0093429	0.99565	0.3235	0.65809	0.018152	0.99936	0.035519	0.98889	-0.20795	0.74424
	contig03110	1.5106	0.0059771	0.60248	0.59707	1.5636	0.0083269	0.12108	0.99997	1.0868	0.036189	0.88568	0.21518	1.7962	0.00011592	1.2926	0.023452	0.83354	0.14906	0.32548	0.81415	1.9235	9.4443e-05	0.3395	0.79907	0.12873	0.95472	-0.098008	0.99936	0.23963	0.9363	0.89641	0.18135
	contig03112	0.30869	0.74714	-0.12907	0.94971	-0.21923	0.80879	-0.35224	0.99997	1.3325	0.02803	-0.68486	0.47756	1.913	0.00033172	-0.66285	0.43406	1.1241	0.086796	-0.34428	0.84185	1.2951	0.011144	-0.75396	0.48599	0.68813	0.56786	-0.82639	0.61619	0.10912	0.98052	-0.69099	0.44551
elegans protein confirmed by transcript evidence	contig03121	0.19297	0.56874	0.37367	0.47415	0.24841	0.40136	0.075091	0.99997	0.37695	0.15575	0.22227	0.60651	0.50745	0.014928	0.49285	0.080757	0.10712	0.80732	0.25513	0.61122	0.50278	0.015899	0.22232	0.6758	-0.13828	0.86002	0.04192	0.99936	-0.2669	0.65587	0.30074	0.40654
	contig03124	0.3645	0.4893	0.49164	0.58342	0.074683	0.91233	0.34543	0.99416	0.034144	0.96615	0.62365	0.28367	0.16699	0.68275	0.55446	0.28885	0.10921	0.89179	0.59794	0.39011	0.35858	0.32717	0.70631	0.24762	-1.1794	0.025908	0.31734	0.93841	-0.94572	0.088944	0.46812	0.44217
nuclear receptor nhr-6	contig03129	1.0218	0.059172	-0.42245	0.73308	0.95674	0.075178	-0.36655	0.99997	0.7901	0.14293	-0.082247	0.95192	0.9498	0.025981	-0.51485	0.48237	0.4571	0.52368	-0.19886	0.90848	0.76148	0.076608	-0.35733	0.77586	-0.23731	0.89162	-0.023152	0.99936	0.061085	0.98823	0.08976	0.94996
malate dehydrogenase nad	contig03131	0.86667	0.18707	-0.24804	0.88372	0.27674	0.74179	-0.20949	0.99997	1.0873	0.07039	-0.27954	0.82197	0.66907	0.19272	-0.47121	0.61142	0.76979	0.27852	-0.88884	0.37061	1.2793	0.009952	-0.59887	0.60948	0.1065	0.97081	-0.22937	0.99936	0.025629	0.99659	0.19396	0.88925
translation initiation factor if-2	contig03138	0.13128	0.79301	0.36	0.58985	0.21538	0.5808	-0.46182	0.66851	0.24734	0.53627	0.0062541	0.99448	0.76291	0.0030806	0.10645	0.87531	0.28388	0.50152	-0.082941	0.94319	0.63318	0.013047	0.11212	0.91392	0.24589	0.74993	-0.22782	0.94667	0.41277	0.47715	0.019736	0.98497
serine threonine-protein phosphatase 2a catalytic subunit beta isoform	contig03142	0.62889	0.076266	0.36157	0.62459	0.57192	0.105	0.24428	0.99997	0.58148	0.089723	-0.12556	0.86953	0.94184	0.0010039	0.14955	0.82517	0.68465	0.051622	0.36959	0.57044	0.85253	0.0027717	0.33722	0.61018	0.059413	0.97163	0.27933	0.92161	0.2251	0.86908	0.30843	0.57535
serine threonine-protein phosphatase 2a catalytic subunit beta isoform	contig03143	0.46389	0.20671	0.26578	0.73921	0.43559	0.23002	0.14681	0.99997	0.55946	0.098929	0.079712	0.92241	0.79421	0.0041167	0.34428	0.45918	0.55496	0.12387	0.34549	0.59919	0.67589	0.013903	0.39244	0.50647	0.13342	0.91271	0.24988	0.94173	0.23714	0.84957	0.45835	0.31009
serine threonine-protein phosphatase 2a catalytic subunit beta isoform	contig03144	0.67383	0.033196	0.22728	0.75653	0.74436	0.021728	0.058776	0.99997	0.73467	0.013307	-0.04937	0.95042	0.98724	0.00020012	-0.0090338	0.99159	0.77749	0.012848	0.2224	0.76341	1.0044	0.00024592	0.25472	0.69751	0.016634	0.99196	0.25415	0.91673	0.070745	0.97192	0.33634	0.45316
PREDICTED: hypothetical protein LOC100448266	contig03145	0.42356	0.30144	0.22767	0.79835	0.59567	0.10827	0.020505	0.99997	0.38359	0.34828	-0.19351	0.78475	0.71235	0.014969	0.092817	0.91051	0.51079	0.20531	0.026654	0.98555	0.86556	0.003651	0.25404	0.76316	-0.054947	0.9762	0.016142	0.99936	0.30404	0.78633	0.083324	0.9269
wu:fc32f04 protein	contig03152	1.6609	0.083764	-0.91911	0.65079	1.4951	0.078241	-0.2798	0.99997	1.1638	0.17697	0.21789	0.92232	0.81946	0.24396	-0.63618	0.66975	2.1826	0.019852	-0.67361	0.75784	0.79254	0.32077	-1.1329	0.47235	-0.072407	0.98687	-0.17438	0.99936	-0.37505	0.93546	-0.2677	0.88597
	contig03169	0.51287	0.64892	0.73865	0.68877	0.72768	0.44583	0.56178	0.99997	1.8933	0.014984	0.48254	0.75611	2.819	7.8294e-05	0.3422	0.83276	1.7933	0.028618	0.11939	0.97252	2.7143	0.00018922	0.44152	0.83953	1.2596	0.30657	-0.50272	0.97345	0.89663	0.61709	-0.011528	0.99627
elegans protein confirmed by transcript evidence	contig03170	1.1041	0.0012781	0.26581	0.73015	0.71933	0.033742	0.022036	0.99997	0.91615	0.0041078	-0.078695	0.92049	1.2968	1.7751e-05	-0.008188	0.99293	0.64671	0.054579	-0.0047964	0.99677	1.2205	6.7432e-05	-0.040341	0.97835	-0.26346	0.74138	-0.024348	0.99936	0.017506	0.99542	0.39431	0.39151
	contig03175	0.51013	0.1189	0.3704	0.57754	0.60617	0.059429	0.13704	0.99997	0.56618	0.065851	0.014033	0.98712	0.98569	0.00023374	0.14487	0.80991	0.49372	0.14252	0.054423	0.96503	0.98839	0.00031693	0.096798	0.93238	-0.12957	0.90759	0.028657	0.99936	-0.3225	0.66303	0.17155	0.78055
	contig03176	-0.25072	0.62982	-0.22809	0.8118	0.046256	0.94267	-0.41502	0.89483	-0.15104	0.79669	-0.8004	0.10081	-0.10151	0.78965	-0.70106	0.094991	-0.70013	0.075072	-1.0266	0.036392	-0.11033	0.76829	-0.7386	0.14844	-0.8586	0.078765	-0.65307	0.37911	-0.98485	0.032638	-0.44635	0.40135
inositol-3-phosphate synthase a	contig03178	1.4224	0.028698	0.62944	0.72764	1.2202	0.041562	0.60015	0.91154	1.2939	0.020555	0.452	0.64835	1.2525	0.0078611	-0.2556	0.82009	1.4316	0.014866	0.0071623	0.99743	1.1842	0.011897	0.49535	0.67732	0.50316	0.70165	-0.12213	0.99936	0.99545	0.24437	-0.016029	0.99219
glycogen debranching enzyme	contig03181	0.089069	0.88081	0.49832	0.46049	0.42433	0.23211	0.077201	0.99997	0.27164	0.51279	-0.015456	0.98625	0.76824	0.0044783	0.46504	0.24418	0.22798	0.63936	0.19792	0.81837	0.84644	0.0021571	0.19665	0.81781	0.071239	0.96158	-0.060344	0.99936	0.045379	0.9861	0.19133	0.76223
b chain structure of p-glycoprotein reveals a molecular basis for poly-specific drug binding	contig03188	0.13954	0.85032	0.17273	0.88584	0.22816	0.69105	-0.31075	0.99997	0.35589	0.51225	-0.29439	0.71052	0.57267	0.10939	-0.44284	0.45541	0.50742	0.32778	-0.27464	0.80164	0.81736	0.019886	-0.32613	0.73824	-0.27454	0.82619	-0.32661	0.93674	0.33264	0.82331	-0.04194	0.97543
rna (guanine-9-) methyltransferase domain containing 2	contig03193	0.32142	0.59795	0.18841	0.88152	0.8896	0.055951	0.29218	0.99997	0.72756	0.11167	0.38314	0.61615	1.345	0.00044369	0.81556	0.10793	0.78973	0.097474	0.35406	0.73038	1.356	0.00052828	0.57873	0.44343	0.44506	0.64032	0.53992	0.69827	-0.044211	0.9899	0.6957	0.23018
rna (guanine-9-) methyltransferase domain containing 2	contig03195	0.4578	0.13172	0.21764	0.74869	0.64723	0.030708	0.15342	0.99997	0.35374	0.26031	0.115	0.85554	0.64922	0.0058749	0.33177	0.38006	0.24863	0.5308	0.14577	0.85993	0.8082	0.00099406	0.29799	0.58204	-0.21191	0.77697	0.20908	0.94855	-0.049741	0.9806	0.4472	0.22547
glutamine synthetase	contig03202	1.0133	0.0056061	0.21517	0.8118	0.78527	0.033213	-0.26758	0.99779	0.7095	0.040217	-0.24132	0.7118	1.1716	0.00014558	-0.1533	0.82792	0.6864	0.061484	-0.28909	0.71226	1.2053	0.00016949	-0.11281	0.92917	-0.20745	0.84407	-0.13607	0.99936	-0.091332	0.96938	-0.26238	0.67509
cysteine repeat modular	contig03211	-0.026109	0.96963	0.17161	0.84407	0.034645	0.95065	-0.10772	0.99997	0.35325	0.34769	0.058007	0.94536	0.62506	0.020184	0.0012961	0.99907	0.36838	0.36494	-0.059347	0.96419	0.69054	0.01057	0.017109	0.99168	-0.023918	0.98942	-0.19825	0.97852	-0.13075	0.94649	0.040327	0.96755
maltase 1	contig03216	1.2773	0.11618	-0.10809	0.97	0.83027	0.34204	0.40885	0.99997	1.4489	0.058094	-0.36549	0.81689	0.80082	0.22533	-0.053086	0.97703	0.22201	0.87781	-0.5244	0.78627	1.4699	0.019847	-0.35559	0.87578	-0.10021	0.98022	-0.49238	0.96937	-0.63018	0.8057	0.053068	0.98302
flocculin-like protein	contig03220	1.6762	0.00014753	0.060652	0.96632	0.41518	0.36485	0.26248	0.99997	0.98025	0.011612	-0.1411	0.87693	1.1674	0.00059269	-0.011668	0.99178	0.86404	0.035003	0.13975	0.91868	1.3039	0.00026445	0.29364	0.75166	-1.5177	0.0021448	0.27378	0.95964	-1.2444	0.0070404	0.45406	0.43242
williams-beuren syndrome chromosome region 16 homolog	contig03222	-0.062388	0.92643	0.12723	0.89411	0.16666	0.72195	-0.17749	0.99997	0.12821	0.814	-0.11536	0.88456	0.56627	0.044654	0.11914	0.87273	0.07468	0.91336	-0.35519	0.59661	0.56553	0.044316	-0.037219	0.98224	0.044373	0.98033	0.015543	0.99936	-0.062	0.98052	0.31134	0.57376
rna binding motif protein 10	contig03224	0.36757	0.39639	0.55908	0.44967	0.59362	0.11522	0.1609	0.99997	0.73477	0.038279	0.020048	0.98434	0.60821	0.041063	0.15352	0.8336	0.24306	0.65498	0.32447	0.67519	0.5004	0.095921	0.18716	0.85537	-0.14246	0.91383	-0.10161	0.99936	-0.32624	0.75389	0.013067	0.99086
	contig03226	0.74259	0.040748	0.23027	0.79181	0.6457	0.074785	-0.28683	0.99535	0.49183	0.18394	0.21808	0.74581	0.91778	0.0017006	0.21374	0.72431	0.25455	0.62024	0.11496	0.92707	0.82721	0.0044905	0.22801	0.79471	-0.21666	0.83621	0.085714	0.99936	0.052635	0.98401	0.49798	0.28409
synaptophysin synaptoporin family protein	contig03234	0.27935	0.53096	0.24514	0.77006	0.78088	0.029924	-0.015375	0.99997	0.3569	0.37181	0.03253	0.97315	0.65595	0.01981	0.12805	0.86072	0.36172	0.41041	-0.12059	0.91858	0.63624	0.023801	0.14813	0.88871	0.10156	0.94035	0.29262	0.90642	0.26253	0.82862	0.5605	0.20327
tetraspanin 74f-like	contig03237	0.62113	0.30896	1.103	0.22615	0.40317	0.53901	1.1567	0.26078	1.1092	0.032378	1.0624	0.12488	1.3433	0.0023187	1.2762	0.025508	0.85721	0.13607	0.98996	0.20671	1.2446	0.0047076	1.1975	0.082315	0.26934	0.87479	0.022083	0.99936	0.35303	0.8676	0.35159	0.72202
adenylate kinase 1	contig03238	1.0757	0.050975	0.14083	0.93013	0.35062	0.6042	0.02559	0.99997	1.1335	0.02909	-0.50782	0.55711	1.2462	0.0044705	-0.78417	0.21859	0.98369	0.078217	-0.6749	0.46939	1.6523	0.00040419	-0.52917	0.6077	-0.045588	0.9876	-0.75849	0.56376	0.11166	0.97659	-0.60068	0.43504
stromal interaction molecule 1	contig03246	0.22717	0.82785	0.64642	0.63103	0.63194	0.37635	0.27384	0.99997	0.6859	0.33041	0.075179	0.96399	1.0672	0.036613	0.187	0.89481	1.031	0.12304	0.21384	0.92091	0.80194	0.12242	0.50395	0.71175	0.34013	0.85967	0.058277	0.99936	0.49838	0.81555	0.050002	0.98093
acyl- synthetase bubblegum family member 2	contig03250	0.20472	0.75811	0.21045	0.85633	0.29255	0.58657	0.0033853	0.99997	0.43408	0.3857	0.073668	0.94682	0.71581	0.041694	-0.0050179	0.99735	0.50895	0.32394	0.34031	0.72458	0.68724	0.050475	0.13646	0.92954	0.034634	0.98867	0.1866	0.99936	0.33281	0.82247	0.32282	0.66772
protein mo25	contig03256	0.70434	0.038537	0.2067	0.80311	0.78656	0.023576	0.060287	0.99997	0.73791	0.021018	-0.27291	0.62739	1.106	0.00012546	0.056866	0.94391	0.80281	0.01674	0.18314	0.84056	1.314	3.6006e-05	0.079925	0.95139	0.051383	0.97571	-0.073293	0.99936	0.2903	0.76254	-0.0125	0.99062
calcium-binding protein 39-like	contig03257	0.96253	0.019909	0.35691	0.70266	0.87434	0.036642	0.078907	0.99997	0.82572	0.035463	0.026131	0.9813	1.2278	0.00035484	0.22535	0.75676	0.76063	0.07018	0.097205	0.95073	1.2808	0.00031693	0.25629	0.80003	0.0092673	0.9957	0.34955	0.89772	0.19778	0.92843	0.48448	0.39346
	contig03258	0.24182	0.77324	0.1043	0.95338	-0.50935	0.41451	0.040842	0.99997	-0.072691	0.94082	-0.047472	0.97489	-0.066264	0.90989	-0.16785	0.88802	0.031734	0.97869	-0.055172	0.97987	0.2022	0.69754	0.089708	0.97003	-1.1906	0.086318	0.39577	0.9434	-1.636	0.00787	0.48035	0.5788
pseudouridylate synthase 7 homolog	contig03264	-0.043329	0.94103	0.16558	0.82678	0.29879	0.3688	-0.12871	0.99997	0.21513	0.57312	-0.10054	0.87994	0.43143	0.072599	0.16823	0.74507	0.10308	0.84409	0.041624	0.97356	0.67053	0.0052663	0.083192	0.94002	-0.10075	0.9268	0.050246	0.99936	-0.0043379	0.99945	0.42528	0.26376
mam domain containing 2	contig03266	0.19064	0.84867	-0.03044	0.98763	0.44714	0.5312	-0.133	0.99997	0.70394	0.26968	-0.38923	0.71881	0.6772	0.16772	-0.078388	0.9546	0.56224	0.46362	-0.45514	0.73197	1.1177	0.018589	-0.25111	0.88726	-0.17791	0.93781	-0.31913	0.98855	0.074257	0.98758	0.0039867	0.99827
sodium-dependent glucose transporter 1	contig03268	0.17865	0.85271	0.10759	0.95399	0.39859	0.56607	0.11065	0.99997	0.63931	0.30181	0.17533	0.89263	1.209	0.0079815	0.28927	0.7784	0.62307	0.36431	0.3257	0.8272	0.41213	0.40594	0.64936	0.5067	0.73424	0.43858	0.33223	0.97852	0.54858	0.69702	0.2948	0.78982
fimbrin plastin	contig03271	0.31235	0.62047	0.13045	0.92467	0.65285	0.17803	-0.12385	0.99997	0.61319	0.21127	-0.10812	0.92298	0.97343	0.0095136	0.16194	0.86932	0.59575	0.26541	0.0049967	0.9977	1.0694	0.0048681	0.15875	0.91866	-0.048933	0.98364	0.11634	0.99936	-0.44282	0.7104	0.3032	0.72212
fimbrin plastin	contig03272	0.41336	0.84757	2.7414	0.2059	0.53672	0.75975	2.554	0.30926	0.15545	0.94629	2.5715	0.11407	0.35799	0.77702	2.779	0.040362	-0.0089744	0.99753	2.5815	0.14277	0.54218	0.65122	2.7705	0.090977	-0.34167	0.94495	0.05989	0.99936	-0.29615	0.97192	0.37998	0.89699
	contig03273	0.41526	0.41033	0.17245	0.88329	0.56104	0.21186	-0.10727	0.99997	0.56039	0.2113	-0.081205	0.94008	0.8733	0.01087	0.28851	0.67429	0.47907	0.35079	0.079167	0.96319	1.0106	0.0037236	0.14225	0.92103	-0.026907	0.99079	0.17672	0.99936	-0.40241	0.71377	0.33606	0.63852
	contig03274	0.086587	0.95527	0.2076	0.93497	0.82478	0.38953	-0.041646	0.99997	0.46263	0.65517	-0.71283	0.65367	0.55769	0.40003	0.19228	0.92148	0.49553	0.65645	0.14228	0.96601	1.4305	0.018692	0.15682	0.96388	1.0855	0.36049	-0.29089	0.99936	1.026	0.4394	-0.0024338	0.99873
par-3 partitioning defective 3 homolog ( elegans)	contig03275	0.46895	0.34161	0.23352	0.83301	0.81895	0.060932	0.095882	0.99997	0.47959	0.31036	0.12666	0.89969	0.82607	0.016796	0.25845	0.72309	0.70942	0.11641	0.089552	0.95849	0.69082	0.0462	-0.041014	0.98336	0.269	0.82751	0.18712	0.99936	0.53576	0.50712	0.44824	0.47681
solute carrier family 7 (cationic amino acid y+ system) member 9	contig03277	0.8734	0.0089009	-0.0038812	0.9965	0.77575	0.024172	0.097813	0.99997	0.82362	0.0092973	-0.35585	0.48206	1.0287	0.00025443	-0.5581	0.13524	0.52523	0.13727	-0.36237	0.55198	0.84991	0.0019855	-0.26842	0.70318	-0.16895	0.87153	-0.16744	0.99573	-0.27607	0.78738	0.15099	0.82309
	contig03278	0.35707	0.28296	0.24922	0.71726	0.68396	0.026213	-0.04869	0.99997	0.55461	0.055444	-0.0067339	0.99433	0.88606	0.00039454	-0.00090737	0.99923	0.34146	0.33707	-0.12259	0.89408	0.90794	0.00040843	0.0093871	0.99529	0.037326	0.98063	-0.021329	0.99936	0.27052	0.73805	0.34667	0.40496
fact complex subunit spt16-like	contig03281	0.41738	0.30783	0.63425	0.33706	0.6243	0.091201	0.15355	0.99997	0.60382	0.092247	0.0014558	0.99847	0.92931	0.0017466	0.18656	0.77739	0.62169	0.099944	0.21282	0.82046	0.80841	0.0059671	0.3266	0.6498	0.22225	0.83502	0.044603	0.99936	0.062951	0.98052	0.44929	0.36371
uncharacterized protein c2orf81-like	contig03283	-0.10145	0.83695	0.22828	0.74017	-0.028941	0.95344	-0.17829	0.99997	0.40601	0.18492	-0.055752	0.94051	0.79392	0.0011166	0.085084	0.89815	0.42107	0.1957	-0.09225	0.92869	0.64409	0.0070962	-0.079313	0.94378	0.20577	0.79262	-0.26896	0.86864	-0.040039	0.9861	-0.12191	0.84417
	contig03286	-0.28849	0.81358	-0.082386	0.97615	-0.50173	0.59257	-0.022454	0.99997	-1.0345	0.18868	0.014842	0.99448	-1.2505	0.040683	-0.13159	0.94249	-0.88336	0.32482	0.26872	0.91602	-0.58246	0.37626	-0.068546	0.98441	-1.8761	0.049079	0.012335	0.99997	-1.5621	0.12207	0.24741	0.884
	contig03289	0.44772	0.22041	0.021092	0.98559	0.70328	0.041773	-0.2497	0.99779	0.49878	0.14686	-0.097609	0.90191	0.76679	0.0049503	-0.15025	0.81817	0.38217	0.34467	-0.16988	0.85809	1.0231	0.00042794	0.032223	0.98336	-0.23032	0.80049	0.093281	0.99936	0.025179	0.99225	0.22192	0.71775
#NAME?	contig03290	0.46119	0.76945	1.001	0.70131	0.82808	0.55324	0.94963	0.99093	1.9551	0.084182	0.84296	0.67368	2.5571	0.0023907	0.53702	0.80406	0.74399	0.61083	0.79819	0.7704	1.2009	0.15553	1.0599	0.63605	-0.43035	0.92598	0.30766	0.99936	0.077638	0.99294	0.60741	0.75155
	contig03298	0.61183	0.026799	0.3006	0.60306	0.62354	0.02679	0.15521	0.99997	0.46593	0.083237	0.059904	0.92779	0.68343	0.0021756	0.20897	0.61178	0.16685	0.68477	0.063707	0.95212	0.82763	0.00042761	0.20935	0.72713	-0.19444	0.78323	0.18189	0.95964	0.13759	0.92369	0.56692	0.075975
tropomyosin 1	contig03299	1.2716	0.0095199	0.51024	0.62369	0.85925	0.083144	0.5431	0.87616	0.75993	0.12061	0.71873	0.27799	0.90385	0.02107	1.0634	0.040362	0.81237	0.11215	0.91288	0.19008	1.2522	0.0019338	1.0685	0.086614	0.10572	0.96076	1.1712	0.12002	-0.37079	0.82331	1.2707	0.023477
isoform cra_a	contig03301	0.24982	0.7036	0.28296	0.80073	0.24705	0.67642	0.21357	0.99997	0.4452	0.3986	0.0011858	0.99927	0.8129	0.026381	0.091996	0.93226	0.51479	0.34554	-0.31422	0.7755	0.93264	0.011053	0.12162	0.94406	-0.079596	0.97035	-0.13798	0.99936	-0.31514	0.85133	0.16945	0.86221
disco-interacting protein 2 homolog partial	contig03304	0.56251	0.098434	0.49207	0.46013	0.61928	0.063846	0.38791	0.85146	0.33777	0.36717	0.55196	0.20358	0.74941	0.004884	0.76261	0.028866	0.035972	0.95924	0.64477	0.16054	0.81563	0.0026103	0.58703	0.20054	-0.036758	0.9821	0.59186	0.32909	-0.29935	0.73755	0.73525	0.054464
disco-interacting protein 2 homolog partial	contig03305	0.055657	0.92314	0.34395	0.58885	0.33089	0.32043	0.10622	0.99997	0.15165	0.72838	0.24965	0.62242	0.43063	0.080007	0.55809	0.092432	-0.0043696	0.99496	0.29802	0.61018	0.48383	0.04699	0.2379	0.71484	0.064677	0.96133	0.11169	0.99936	0.076852	0.96938	0.55324	0.1285
disco-interacting protein 2 homolog partial	contig03306	0.46677	0.21754	0.22306	0.79406	0.69678	0.051233	0.41915	0.84265	0.26275	0.55793	0.27605	0.64363	0.68254	0.015368	0.72305	0.054017	0.18426	0.74126	0.32995	0.64056	0.81032	0.0045406	0.41622	0.48702	-0.0021302	0.99854	0.49645	0.55305	-0.29115	0.78738	0.81813	0.04293
	contig03308	0.16048	0.79492	0.090829	0.9392	0.37295	0.40263	-0.12865	0.99997	0.31415	0.51923	-0.11216	0.90273	0.54854	0.084415	-0.062754	0.94645	0.27781	0.62065	-0.59863	0.32849	0.64199	0.04095	0.069022	0.9656	-0.19883	0.87146	-0.15145	0.99936	0.067529	0.98052	0.36185	0.55136
	contig03309	0.096153	0.81124	0.28489	0.58843	0.2732	0.32109	0.071234	0.99997	0.38378	0.1278	0.2834	0.44777	0.69874	0.00074844	0.29982	0.34413	0.22824	0.48859	0.20922	0.69598	0.66881	0.001339	0.3313	0.414	0.02184	0.98668	-0.046717	0.99936	0.10811	0.93796	0.27024	0.45051
	contig03313	0.18135	0.79128	0.48447	0.59849	0.70216	0.11409	0.11079	0.99997	1.2014	0.0041761	0.082351	0.94051	1.7661	1.1901e-05	0.23114	0.76755	1.485	0.00083032	0.52101	0.49687	1.4033	0.00024093	0.48156	0.53018	0.89338	0.12279	-0.39127	0.873	0.43636	0.67625	-0.18512	0.83784
caspase-8-like protein	contig03314	0.2728	0.33489	0.15713	0.79435	0.4552	0.069268	-0.11235	0.99997	0.42853	0.077505	-0.098321	0.85294	0.75691	0.00028949	-0.10167	0.83583	0.32397	0.24965	-0.075806	0.93074	0.81379	0.00020081	-0.031059	0.97789	-0.18253	0.77102	-0.17868	0.94575	0.20597	0.78679	0.19882	0.62872
stromal cell-derived factor 2-like 1	contig03317	1.296	0.062349	0.09626	0.96859	3.1562	0.00033601	0.10461	0.99997	0.98291	0.15956	-0.47665	0.69515	1.3825	0.011646	0.026151	0.98827	0.38854	0.7126	-0.02483	0.99163	1.1865	0.030374	-0.15963	0.95265	0.36926	0.85659	0.23254	0.99936	-0.028808	0.99645	0.73583	0.45169
alternative splicing factor srp55 b52	contig03325	0.48912	0.26059	-0.1756	0.8683	0.26863	0.57869	-0.77162	0.33604	0.21767	0.69494	-0.76806	0.1274	0.47354	0.14476	-0.84374	0.043894	0.15162	0.82327	-0.36617	0.64817	0.89441	0.0051616	-0.50088	0.43974	-0.31745	0.73456	-0.027795	0.99936	-0.081316	0.97646	-0.048024	0.96689
gtpase_rho	contig03328	0.74409	0.022299	0.27233	0.71267	0.81113	0.016205	-0.06687	0.99997	0.81549	0.0079443	-0.23867	0.67187	1.1168	7.1622e-05	-0.24606	0.61213	0.59906	0.06983	0.028458	0.98256	1.0887	0.00015514	0.017118	0.99115	-0.051791	0.97368	0.015422	0.99936	-0.20329	0.87676	0.15221	0.81509
ras-like gtp-binding protein rho1	contig03329	0.96821	0.0024727	0.39309	0.54073	0.77518	0.017494	0.28918	0.94982	0.86352	0.0040999	0.035941	0.96519	1.1801	2.6289e-05	0.27244	0.54356	0.64337	0.040264	0.34344	0.54702	1.0424	0.00017254	0.31123	0.59466	-0.0067121	0.9957	0.2826	0.87015	0.094638	0.96353	0.48	0.22257
gtpase_rho	contig03330	0.91125	0.073633	0.31082	0.79919	0.43043	0.46151	0.16419	0.99997	1.2727	0.0074105	0.1236	0.91732	1.4949	0.0003552	-0.1319	0.90685	0.95292	0.060971	0.179	0.9144	1.269	0.0020684	0.030845	0.9902	-0.046716	0.98526	0.025456	0.99936	0.3642	0.83653	0.17277	0.8736
carnitine acetyltransferase	contig03331	0.24732	0.62095	0.24958	0.78007	0.34124	0.42411	0.18398	0.99997	0.64041	0.077601	0.034307	0.97315	1.3133	5.5079e-05	-0.018833	0.98369	0.53126	0.19072	0.046384	0.97608	0.95979	0.0017701	0.049621	0.97602	0.26841	0.77697	-0.2456	0.96017	0.061688	0.98085	0.019408	0.98672
	contig03332	0.42474	0.16348	0.11725	0.88246	0.59553	0.043455	0.0067234	0.99997	0.4341	0.1379	-0.15294	0.78475	0.88942	0.00026774	-0.0055089	0.99447	0.31542	0.36929	-0.052848	0.96339	0.82955	0.00069949	-0.049075	0.96805	-0.11483	0.91005	-0.11376	0.99936	0.15949	0.90764	0.19606	0.70542
hemicentin 1	contig03334	1.4544	0.020144	0.20528	0.90548	0.93673	0.14152	-0.43125	0.99997	1.1248	0.062489	-0.56099	0.57705	1.6314	0.0013403	-0.26523	0.82668	1.4109	0.022975	-0.27208	0.88329	1.6848	0.0011564	-0.15638	0.94715	0.94737	0.30896	-0.26198	0.99936	1.3913	0.083834	-0.38091	0.73921
at5g14920 f2g14_40	contig03335	1.7164	0.021991	-0.0040637	0.998	1.2482	0.097988	-0.50909	0.99997	1.5163	0.032756	-0.5595	0.66314	2.1766	0.0004445	-0.34185	0.80866	1.9065	0.010072	-0.47869	0.79475	2.2909	0.00035676	-0.38721	0.84851	1.3646	0.18062	-0.20162	0.99936	1.5716	0.10573	-0.19981	0.90911
hypothetical protein MCAG_04497 [Micromonospora sp. ATCC 39149]	contig03336	1.7787	0.01339	-0.22628	0.91172	1.1596	0.11145	-0.71017	0.92402	1.3474	0.051645	-0.87738	0.39138	1.9528	0.00094024	-0.56064	0.59902	1.5902	0.026287	-0.76287	0.56899	2.165	0.00042761	-0.54483	0.72915	0.92287	0.44182	-0.16721	0.99936	1.4108	0.14696	-0.039257	0.98638
	contig03340	-0.36004	0.70692	-0.069522	0.97722	0.36974	0.66457	1.0269	0.60902	0.80164	0.26048	1.2234	0.15053	1.1017	0.039033	0.30786	0.80684	0.83749	0.27118	1.0193	0.3253	0.91951	0.087435	0.92317	0.37717	0.66676	0.6165	0.57863	0.88728	0.47729	0.83999	0.79221	0.38839
hypothetical protein CTRG_04948 [Candida tropicalis MYA-3404]	contig03354	0.5388	0.10113	0.38148	0.56821	0.65161	0.044851	0.079102	0.99997	0.51816	0.10076	-0.026519	0.97607	0.83342	0.0014089	0.16176	0.77996	0.41249	0.25528	0.14138	0.88098	0.91201	0.00071669	0.20073	0.79773	-0.20791	0.81537	-0.037674	0.99936	0.00085881	0.99991	0.20981	0.71699
ribonucleotide reductase m1	contig03356	0.20545	0.6678	-0.35454	0.62703	0.11262	0.81909	-0.38704	0.8737	-0.093933	0.87106	-0.90265	0.032892	0.29525	0.31616	-0.17523	0.7784	0.27666	0.55981	-0.54249	0.30581	0.23835	0.4301	-0.63078	0.17924	-0.2128	0.83001	0.024104	0.99936	-0.036019	0.98889	-0.29747	0.58968
26s proteasome regulatory subunit t3	contig03361	0.57982	0.17358	0.64279	0.41164	0.67101	0.10045	0.20135	0.99997	0.95137	0.012668	0.52837	0.34758	1.4408	4.8535e-05	0.49048	0.33102	0.69875	0.094259	0.41975	0.58153	1.3257	0.00019472	0.56352	0.37269	0.18528	0.88659	-0.056096	0.99936	-0.048249	0.98777	0.30088	0.66237
cg16916 protein	contig03362	0.18882	0.60763	0.46081	0.3738	0.38606	0.17683	0.050992	0.99997	0.43621	0.11247	0.32908	0.40918	0.76213	0.00081679	0.5445	0.066375	0.31644	0.33364	0.26966	0.61238	0.74933	0.0011371	0.35629	0.43014	0.16937	0.83296	0.014488	0.99936	0.33244	0.53558	0.34108	0.36267
cg16916 protein	contig03363	0.55266	0.074425	0.28831	0.66731	0.44171	0.15883	-0.13147	0.99997	0.50231	0.093886	0.18293	0.74827	0.84327	0.00078263	0.28936	0.4908	0.43578	0.19005	0.23357	0.73154	0.87268	0.00068829	0.15802	0.84875	-0.18866	0.82888	-0.047256	0.99936	0.28717	0.71109	0.52903	0.15344
	contig03365	-0.094573	0.87752	0.019149	0.98708	-0.46199	0.20581	-0.4353	0.81192	-0.20393	0.67304	-1.0323	0.01223	-0.017073	0.96566	-1.1959	0.0011604	-0.15631	0.78694	-0.61192	0.23435	-0.045808	0.89881	-0.75652	0.089656	-0.72689	0.11054	-0.72605	0.19756	-0.7627	0.089684	-0.62974	0.13329
zinc finger protein 45-like	contig03370	0.20025	0.61188	0.21135	0.76196	0.45711	0.12986	-0.023388	0.99997	0.15446	0.71395	0.29055	0.52907	0.52247	0.027247	0.44494	0.19276	-0.059478	0.91781	0.18029	0.80735	0.5592	0.018044	0.20756	0.75906	-0.21808	0.76977	0.18946	0.96604	-0.28581	0.69499	0.44872	0.22847
nephrocystin 1-like	contig03371	2.1119	0.019733	0.1336	0.97713	0.89558	0.37329	0.15804	0.99997	0.95768	0.33574	0.19039	0.95292	1.1637	0.11171	0.24949	0.93418	1.5105	0.10601	-0.39992	0.92786	1.2379	0.088247	0.049839	0.99338	-0.60267	0.83689	-0.73105	0.91388	0.0033162	0.99988	0.093905	0.97311
pdgf- and vegf-related factor 1-like	contig03383	1.1339	0.0051937	-0.1056	0.92829	1.1604	0.0078587	-0.033964	0.99997	1.0902	0.004338	-0.25659	0.72629	1.5102	2.5346e-05	-0.079343	0.93346	1.0101	0.011004	-0.46468	0.5113	1.7384	1.0346e-05	-0.39821	0.59255	-0.12504	0.93443	-0.55497	0.56627	0.14234	0.95289	0.11984	0.89581
sterol-c4-methyl oxidase-like	contig03391	2.0649	0.0026007	1.0099	0.45073	1.2412	0.0674	1.307	0.3373	2.6686	0.00015812	1.0363	0.24758	2.6224	1.7698e-05	0.80836	0.33854	1.9891	0.0034078	0.9364	0.39066	2.1044	0.00030188	1.0165	0.30834	0.31816	0.88118	0.31289	0.99831	1.0502	0.31248	0.65016	0.52236
hypothetical protein BRAFLDRAFT_88447 [Branchiostoma floridae]	contig03394	0.054477	0.92371	0.39462	0.51677	0.24687	0.48427	0.26602	0.96481	0.31895	0.33637	0.21508	0.68159	0.55299	0.020687	0.27868	0.50264	0.033065	0.9586	0.15599	0.85063	0.52539	0.027952	0.32934	0.52932	-0.12075	0.9094	-0.039551	0.99936	-0.2268	0.8232	0.35371	0.39172
tropomyosin invertebrate	contig03408	0.20525	0.6299	-0.091753	0.91921	-0.012807	0.98147	-0.030725	0.99997	0.44405	0.16754	-0.45488	0.28655	0.68049	0.0069698	-0.19316	0.71343	0.26363	0.53706	-0.19907	0.79979	0.65016	0.0099733	-0.15047	0.86604	-0.26766	0.7093	-0.29578	0.85104	-0.28649	0.73138	0.17838	0.76379
	contig03412	-0.42225	0.55373	-0.20176	0.89372	-0.94316	0.093229	-0.004985	0.99997	-0.9486	0.080497	0.49215	0.58529	-0.68928	0.12888	-0.27148	0.7918	-0.74501	0.2299	-0.11956	0.95622	-0.89279	0.044542	-0.13796	0.94839	-0.34019	0.83255	-0.34579	0.96937	-0.20407	0.95053	-0.37303	0.70755
	contig03414	0.78603	0.2681	0.21199	0.90562	0.93792	0.15638	0.34333	0.99997	0.73621	0.2903	0.46722	0.67762	0.90659	0.081778	0.11722	0.93893	0.34352	0.73354	0.02829	0.98969	1.4641	0.0049273	0.27791	0.88313	0.20217	0.93414	-0.23617	0.99936	0.32433	0.92259	0.18366	0.90121
calmodulin	contig03415	0.23499	0.45836	0.3686	0.48814	0.48009	0.070061	0.18574	0.99997	0.20718	0.52758	0.21606	0.62229	0.4243	0.044522	0.30733	0.35763	0.0084648	0.98725	0.18632	0.76325	0.32794	0.12598	0.084451	0.9258	-0.03045	0.98193	0.055407	0.99936	-0.11984	0.9331	0.1879	0.68128
outer membrane protein	contig03421	0.66147	0.065303	0.4817	0.50228	0.54064	0.13451	0.25385	0.99997	0.49256	0.1745	0.16566	0.81514	0.87889	0.0022075	0.21506	0.71731	0.57074	0.1246	0.22283	0.80037	0.93593	0.0014152	0.44595	0.44202	-0.21762	0.83154	0.46149	0.61231	-0.14847	0.94185	0.348	0.51194
kiaa0562 protein	contig03422	-0.47036	0.45845	-0.22697	0.87311	0.4046	0.52074	-0.035874	0.99997	0.74311	0.16746	-0.28988	0.77362	0.92866	0.027375	-0.60508	0.36949	0.81891	0.14213	-0.23039	0.88277	1.073	0.010998	-0.3527	0.77578	0.45896	0.69789	-0.19629	0.99936	0.40742	0.81758	0.18979	0.86671
nucleolin	contig03427	-0.23649	0.63652	0.51073	0.49131	-0.47272	0.22326	0.22999	0.99997	0.34067	0.43137	0.1183	0.88762	0.61267	0.038047	0.25276	0.66464	0.5846	0.1327	0.47894	0.43698	0.5152	0.083341	0.46533	0.4409	-0.077615	0.96209	-0.20954	0.98134	-0.47575	0.47985	-0.015978	0.98856
	contig03428	0.061121	0.90608	0.27299	0.6508	0.20649	0.53917	-0.032408	0.99997	0.29842	0.33356	-0.041678	0.95293	0.59059	0.0081018	0.23912	0.5513	0.26703	0.45529	0.027814	0.98002	0.62557	0.0054308	0.07894	0.93895	-0.14795	0.85985	-0.1973	0.94986	-0.1241	0.93546	0.15409	0.77231
ras-related protein rab-14	contig03436	0.94031	0.042877	0.43621	0.6656	0.75162	0.15412	0.38335	0.98714	0.50925	0.31019	0.14986	0.88566	1.1218	0.0025858	-0.12417	0.90472	0.47782	0.40094	0.5663	0.47339	1.3173	0.00069039	0.62697	0.39158	-0.3313	0.77697	0.29289	0.96604	-0.017076	0.99748	0.27609	0.74536
toll-like receptor 4	contig03443	1.415	0.010798	1.1572	0.21903	1.2709	0.039899	1.2005	0.24404	1.521	0.0042452	2.1347	0.00090322	1.9568	6.0014e-05	1.9446	0.00099588	1.5226	0.0062016	1.4705	0.038074	1.9209	0.00012246	1.7502	0.0063481	0.094875	0.96622	0.89779	0.31767	0.45337	0.72517	0.8363	0.16743
	contig03444	1.1182	0.039101	0.72529	0.50532	0.82201	0.13322	0.60088	0.87514	0.44862	0.49332	0.65803	0.38831	0.58764	0.18651	0.78199	0.21062	0.85655	0.12977	0.49465	0.64966	0.72382	0.095624	0.81855	0.30008	-0.20445	0.91523	0.72602	0.58901	-0.3804	0.84404	0.36147	0.70631
	contig03451	0.42761	0.48052	0.27492	0.82731	0.32597	0.59313	0.48487	0.92913	0.65028	0.20923	-0.0048318	0.99741	0.81751	0.039686	0.15381	0.88627	0.90533	0.074397	0.28935	0.8204	1.522	0.00035852	0.54581	0.5288	0.37898	0.75248	0.20876	0.99936	0.38814	0.81475	0.30163	0.74158
alpha tubulin	contig03454	-0.29094	0.60046	0.31807	0.74357	0.126	0.83494	-0.13532	0.99997	0.59466	0.16529	-0.31065	0.66968	1.0468	0.0021021	-0.19122	0.80987	0.52935	0.26841	0.017692	0.9902	0.93409	0.0057334	-0.16713	0.89479	0.065945	0.97406	-0.4386	0.78166	-0.26074	0.87974	-0.19048	0.82181
tubulin alpha-1 chain	contig03455	0.20822	0.55193	0.23464	0.70536	0.43185	0.11912	-0.066722	0.99997	0.11787	0.77393	-0.017211	0.98137	0.55879	0.01038	0.46147	0.12878	0.13865	0.75079	-0.0026828	0.9977	0.67957	0.0023744	0.17873	0.78419	-0.071906	0.94617	0.09822	0.99936	-0.080512	0.9644	0.33464	0.36623
sodium- and chloride-dependent glycine transporter 1	contig03461	0.31473	0.75867	1.4435	0.12779	0.35928	0.68264	1.2575	0.26603	-0.1173	0.92054	0.95289	0.23482	0.56701	0.32765	1.3336	0.037207	0.54301	0.55921	1.4996	0.056082	0.4891	0.40626	1.3352	0.081901	-0.50587	0.71784	0.57116	0.84892	-0.38913	0.87061	0.24625	0.84543
endoplasmin precursor	contig03466	1.2823	0.0080593	0.95401	0.24023	0.56629	0.27556	0.38877	0.99416	1.1607	0.01111	0.2865	0.75237	1.5329	0.00018017	0.51383	0.41905	1.1289	0.018887	0.48882	0.59638	1.4349	0.00048606	0.32709	0.77269	-0.48528	0.61474	-0.35048	0.9428	-1.3369	0.016959	0.21862	0.82261
type alpha 1	contig03470	-0.50663	0.58537	0.56694	0.72848	0.88007	0.24092	0.31735	0.99997	0.98333	0.1759	0.47314	0.71155	1.6039	0.0048199	0.29823	0.82909	1.6797	0.01716	0.6682	0.63639	1.8115	0.0018997	0.62157	0.66025	0.74267	0.5872	-0.15457	0.99936	0.64357	0.73269	0.20315	0.9008
cytochrome p450 family 4	contig03476	-1.8651	0.20028	-1.2411	0.50135	-0.1163	0.96509	-0.454	0.99997	-0.65721	0.71782	-0.93443	0.49941	-0.20122	0.87922	-2.1566	0.049131	-1.287	0.42342	-1.3393	0.35623	-1.0019	0.46748	-1.243	0.39081	-1.056	0.74581	-0.68574	0.95604	-0.20128	0.98383	-0.12534	0.96021
glutamine synthetase	contig03479	0.95476	0.0068764	-0.0723	0.94875	0.6543	0.06463	-0.022173	0.99997	0.6308	0.063866	-0.53098	0.25853	0.78232	0.0055018	-0.54783	0.172	0.26938	0.58335	-0.28625	0.70522	0.84249	0.0031962	-0.32508	0.63292	-0.69513	0.13854	-0.33529	0.84209	-0.26394	0.82389	0.026335	0.98175
cytochrome family subfamily polypeptide 2	contig03484	0.65825	0.19166	0.35406	0.74657	0.49897	0.34119	-0.11712	0.99997	1.027	0.022674	-0.27841	0.75551	1.3602	0.00054166	0.0090388	0.99444	1.2101	0.010185	0.12884	0.94044	1.2564	0.0013926	0.095596	0.96049	0.052511	0.9821	-0.29291	0.97131	0.13451	0.96558	-0.23018	0.80623
xaa-pro aminopeptidase	contig03487	1.3668	0.040688	0.39931	0.80715	1.1049	0.098415	0.60212	0.955	2.1134	0.0012778	0.34359	0.78813	2.4568	3.0017e-05	0.45507	0.66282	2.3504	0.00048665	0.41672	0.7998	2.1726	0.0001929	0.59487	0.64752	0.75991	0.52206	0.060356	0.99936	0.68467	0.6496	0.44515	0.70631
x-prolyl aminopeptidase (aminopeptidase p) soluble	contig03488	0.95187	0.41748	1.9993	0.23205	1.1505	0.2836	2.0578	0.26603	1.5104	0.13051	1.9732	0.11944	1.909	0.016262	1.4068	0.23056	1.4757	0.16824	2.1823	0.10519	1.5385	0.053863	2.0202	0.11961	0.88456	0.69026	0.032949	0.99936	1.1016	0.60399	0.61291	0.73684
ccaat enhancer binding protein (c ebp) gamma	contig03492	0.84147	0.0095085	0.10296	0.91082	0.32572	0.36923	-0.2311	0.99997	0.67232	0.029766	-0.1351	0.84134	0.96906	0.00035011	0.31056	0.48688	0.41737	0.25707	0.15994	0.86031	0.87484	0.0011902	-0.063429	0.96162	0.016579	0.99227	0.092509	0.99936	0.077497	0.97087	0.24521	0.65717
beta- -endoglucanase	contig03493	1.9548	0.0024727	0.40001	0.79442	1.5537	0.018261	0.21069	0.99997	2.1076	0.00092046	-0.50359	0.63748	2.3054	3.8872e-05	-0.56865	0.5244	2.0222	0.0016342	-0.24238	0.90609	2.0877	0.00019029	-0.19255	0.93311	0.51147	0.73265	-0.35596	0.98334	0.13706	0.97433	-0.10588	0.9506
beta- -endoglucanase	contig03495	0.67921	0.093959	0.21398	0.83202	0.37924	0.39675	0.29117	0.99779	0.94375	0.011627	-0.2367	0.74956	1.1727	0.00037754	0.049145	0.95752	0.90025	0.022067	-0.15553	0.90068	0.9193	0.0041569	0.1242	0.92905	0.44574	0.5363	-0.12889	0.99936	0.47038	0.54345	0.021861	0.9861
conserved plasmodium protein	contig03497	-0.043383	0.96825	0.38006	0.76045	0.4988	0.40889	0.37598	0.99997	0.81503	0.12455	0.13745	0.91269	0.98371	0.020225	0.2111	0.84179	0.92846	0.090215	0.47858	0.66074	1.3005	0.0026994	-0.025324	0.99196	0.94422	0.19759	-0.020855	0.99936	0.40014	0.82362	0.056384	0.97229
family c2 unassigned peptidase (c02 family)	contig03499	0.3554	0.55662	0.24229	0.84329	0.27817	0.6406	0.34107	0.99997	0.82411	0.070652	0.27358	0.75788	0.97004	0.0098316	0.3087	0.68583	0.46619	0.43291	0.21027	0.87798	0.73748	0.050205	0.44492	0.62241	0.060453	0.97971	-0.16928	0.99936	0.34964	0.82862	0.39455	0.60433
acyl- synthetase bubblegum family member 1	contig03502	1.2768	0.029686	-0.036023	0.9857	1.2641	0.033229	-0.11717	0.99997	2.2055	0.00024445	-0.45679	0.64322	2.7977	1.5098e-06	-0.18763	0.88087	2.2955	0.00013122	-0.10886	0.96269	2.3937	2.1551e-05	-0.069341	0.9792	1.6389	0.021829	-0.37515	0.96522	1.0854	0.18277	-0.056908	0.9748
dynactin subunit 1	contig03507	-0.96844	0.14832	-0.19524	0.91598	-1.229	0.058824	-1.0998	0.46442	-0.53874	0.49174	-0.67712	0.4886	-0.68812	0.19738	-1.3551	0.046717	-0.2951	0.78029	-0.79261	0.47339	-0.81973	0.11682	-1.1235	0.20804	-0.19764	0.9355	-1.2557	0.24682	-0.41118	0.8714	-1.5178	0.040051
	contig03515	0.59023	0.032606	0.41693	0.44448	0.69356	0.015289	0.33291	0.83119	0.50263	0.058252	0.23358	0.60651	0.87301	0.00017374	0.46187	0.13092	0.28348	0.40537	0.34996	0.4489	0.86172	0.00028856	0.35272	0.43014	-0.0028664	0.99749	0.30538	0.7399	0.11732	0.93906	0.61385	0.053459
	contig03516	0.57195	0.14795	0.56022	0.46049	0.55227	0.15673	0.25894	0.99997	0.44045	0.28037	0.31431	0.61794	0.97218	0.0016454	0.3083	0.57828	0.33806	0.50066	0.2968	0.7215	0.93386	0.0026027	0.31207	0.69183	-0.027737	0.98942	0.18418	0.99593	-0.0015837	0.99964	0.36359	0.52662
orm1-like protein 3	contig03518	0.42658	0.13947	0.060827	0.94358	0.47355	0.093075	-0.17169	0.99997	0.57769	0.029537	-0.34848	0.37574	1.1609	8.9782e-06	-0.084681	0.88933	0.65841	0.017446	-0.097685	0.91706	1.134	2.3036e-05	-0.07397	0.94406	-0.0073009	0.99541	-0.16628	0.97737	0.25924	0.71687	0.081432	0.89908
ly-6 neurotoxin-related protein	contig03523	1.4588	0.013904	0.10152	0.95891	0.86219	0.15709	0.076195	0.99997	1.9507	0.00098956	0.077646	0.96003	2.2303	2.6241e-05	0.36326	0.71369	1.8931	0.0015984	0.20105	0.91924	2.3232	3.4469e-05	0.3216	0.83535	0.81336	0.39236	-0.47223	0.92215	1.9805	0.0023684	0.36877	0.73461
ef hand family protein	contig03526	0.92226	0.071211	0.0081216	0.9961	0.37371	0.53771	0.38354	0.99779	1.0353	0.030866	-0.40993	0.62554	1.3436	0.0011142	-0.46523	0.50682	0.19848	0.81649	-0.25864	0.85216	1.0118	0.011999	-0.39081	0.71814	-1.2962	0.039293	-0.058213	0.99936	-0.79663	0.30143	-0.086326	0.94818
	contig03533	0.55982	0.11204	0.42295	0.55129	0.39163	0.29156	0.12897	0.99997	0.50423	0.14602	-0.20378	0.75167	0.49333	0.074901	-0.0063702	0.99457	0.11458	0.85128	-0.047868	0.97365	0.59563	0.0296	-0.085239	0.94826	-0.46541	0.40222	-0.63061	0.30205	-0.32534	0.70697	-0.018201	0.9866
	contig03538	0.7877	0.10496	0.40924	0.7037	0.72523	0.13305	0.30904	0.99997	0.74583	0.11275	-0.10904	0.92298	0.81698	0.030872	0.25469	0.76123	0.70465	0.16671	0.23502	0.85981	0.91124	0.01596	0.42334	0.65021	-0.43704	0.66988	0.12877	0.99936	-0.14163	0.96379	0.56946	0.38011
in family member (ttn-1)	contig03544	0.10468	0.93083	0.43656	0.76967	0.82148	0.20891	0.53364	0.97969	0.80327	0.22046	0.86914	0.31214	1.3686	0.0063096	0.59547	0.48928	0.93048	0.16671	0.7761	0.46733	1.5018	0.0031542	0.71276	0.5067	0.099739	0.97371	0.48715	0.92874	0.38746	0.88084	0.61538	0.51114
ribosomal protein s1	contig03546	0.82227	0.11132	0.6132	0.55644	0.62674	0.23877	0.79734	0.57841	0.8451	0.086253	1.1541	0.067954	1.6874	9.5297e-05	0.97076	0.072149	1.0923	0.029034	0.87418	0.24021	1.7178	0.00013353	0.84871	0.22901	-0.1713	0.92598	-0.13718	0.99936	-0.11153	0.97293	0.18189	0.86582
atp-dependent rna helicase ddx39	contig03547	0.20302	0.55975	0.20993	0.73875	0.41757	0.1292	-0.17743	0.99997	0.34397	0.22598	-0.24445	0.57552	0.53476	0.013191	-0.17516	0.69068	0.24081	0.50043	0.0095468	0.99183	0.51435	0.017149	0.11181	0.89168	0.01851	0.98982	-0.075971	0.99936	-0.24427	0.73611	-0.10379	0.8576
hla-b associated transcript 1	contig03548	0.17133	0.63652	0.39351	0.46049	0.30755	0.28609	0.14051	0.99997	0.25071	0.42129	0.12145	0.82086	0.44613	0.037024	0.22376	0.56473	0.073417	0.88087	0.30175	0.52736	0.40485	0.059013	0.35755	0.40433	0.022693	0.98711	0.048855	0.99936	-0.027031	0.98889	0.42013	0.2082
leucine-zipper-like transcription regulator 1	contig03557	0.11581	0.87615	0.23796	0.8251	0.44929	0.33617	-0.093522	0.99997	0.68055	0.10409	0.1211	0.90249	0.99417	0.0035987	0.058678	0.95276	0.53109	0.27283	-0.050535	0.97704	0.83144	0.01404	0.021363	0.99176	0.5323	0.45855	-0.19656	0.99831	0.71597	0.24755	0.018962	0.98833
ubiquitin-conjugating enzyme e2 a	contig03563	1.7913	0.043719	0.2519	0.93115	1.7714	0.04736	0.18397	0.99997	1.4474	0.094577	0.76058	0.64909	1.5011	0.032976	-0.40733	0.83339	1.3617	0.14441	-0.28901	0.93438	1.4315	0.042006	0.69394	0.75661	0.25815	0.93949	-0.1756	0.99936	0.40084	0.93285	-0.191	0.92995
	contig03589	0.44846	0.68779	-0.8237	0.70916	0.83651	0.33808	0.030529	0.99997	0.5636	0.58115	-0.49401	0.76998	1.5514	0.014305	-0.47926	0.75865	1.0071	0.26365	-0.80479	0.65613	0.35994	0.66421	-0.46438	0.84592	0.42985	0.85458	0.22561	0.99936	0.55824	0.84489	0.12138	0.95518
	contig03590	0.50064	0.30104	0.31404	0.75575	0.78751	0.070883	0.3485	0.99416	0.49045	0.29574	0.14804	0.87788	0.63927	0.067353	0.12118	0.90105	0.57815	0.23255	0.3312	0.73197	0.78772	0.022608	0.39092	0.64468	0.11541	0.94495	0.070283	0.99936	0.30904	0.84195	0.408	0.53767
	contig03594	1.4049	0.031123	0.66554	0.62703	0.5223	0.49605	0.63682	0.92651	1.4398	0.01896	0.78558	0.3945	1.4842	0.0043694	-0.28853	0.81596	0.70223	0.37027	0.39002	0.81183	0.92355	0.076514	0.46471	0.75053	-0.054489	0.98726	0.3191	0.99593	0.54113	0.78115	0.56944	0.57764
regulator of g-protein signaling 22	contig03595	-0.25608	0.64693	0.10225	0.9331	-0.21538	0.68644	-0.48863	0.84031	0.68719	0.086911	-0.43254	0.48736	1.1685	0.00056913	-0.5574	0.25431	1.1573	0.0048239	-0.42226	0.58616	1.0562	0.0017709	-0.4113	0.58728	0.29497	0.77729	-0.85039	0.19756	-0.061568	0.98383	-0.5186	0.34507
regulator of g-protein signaling 22	contig03596	0.13386	0.85757	0.13888	0.91074	0.26803	0.62496	-0.13667	0.99997	0.52271	0.26419	-0.3388	0.64835	0.76162	0.029355	-0.95942	0.037937	0.33173	0.58908	0.16882	0.90383	0.67742	0.053411	-0.1015	0.95266	-0.10887	0.95105	-0.18883	0.99936	-0.054016	0.98777	0.12138	0.90538
protein c20orf11 homolog	contig03604	-0.056036	0.95138	0.2862	0.79442	-0.19576	0.75247	0.052543	0.99997	0.89714	0.038517	-0.29019	0.72684	1.3868	0.000276	-0.24857	0.75676	0.85658	0.063209	0.35443	0.72313	1.0616	0.0039723	-0.084965	0.96338	0.38188	0.71575	-0.51157	0.73315	0.46229	0.65984	-0.20092	0.82836
	contig03606	-0.24882	0.57179	0.43322	0.52887	0.067202	0.8981	-0.075551	0.99997	0.53768	0.10886	0.13367	0.85294	0.97506	0.00051415	0.41738	0.32054	0.60631	0.081163	0.11716	0.91777	0.76879	0.0049564	0.25908	0.72408	0.4053	0.49459	-0.28831	0.89738	0.37117	0.61164	0.10021	0.89705
	contig03613	1.3034	0.096655	0.29852	0.88714	0.45467	0.63896	0.34406	0.99997	1.967	0.0065749	-0.25268	0.88405	2.4658	0.00015156	-0.020743	0.99253	1.7761	0.019619	-0.237	0.92891	2.1545	0.00079394	0.1302	0.96771	0.65817	0.7026	-0.59691	0.92823	0.8353	0.61437	-0.052904	0.98245
	contig03615	0.92617	0.15409	0.28531	0.86337	0.34977	0.66041	0.48185	0.99651	1.0451	0.086216	0.074866	0.9629	1.4188	0.0045268	0.19487	0.88538	0.91149	0.17485	-0.03837	0.98709	1.2815	0.010089	0.3688	0.81351	0.064718	0.98364	-0.12801	0.99936	0.69302	0.59663	0.44977	0.67638
	contig03619	0.43529	0.19109	0.20766	0.78416	0.43419	0.17964	0.20029	0.99997	0.35665	0.29279	0.27101	0.59732	0.64017	0.010574	0.69716	0.034948	0.14758	0.77297	0.40091	0.44725	0.62594	0.012491	0.47559	0.3039	-0.18168	0.84256	0.4094	0.61088	-0.33351	0.63159	0.91859	0.011316
	contig03620	0.075673	0.86479	0.19604	0.74367	0.36723	0.17027	-0.00048746	0.99997	0.30825	0.2681	0.025816	0.97002	0.6252	0.002899	0.30355	0.35677	0.18228	0.62397	0.10811	0.8922	0.73601	0.00074913	0.18942	0.74424	-0.056611	0.96006	0.11891	0.99869	0.010041	0.99739	0.5273	0.081257
	contig03622	-0.056029	0.91414	0.35081	0.5338	0.27817	0.3663	0.10869	0.99997	0.20119	0.56906	0.41236	0.26717	0.41802	0.06006	0.60189	0.039214	0.045704	0.93275	0.28966	0.57401	0.46898	0.033341	0.39351	0.35329	0.072285	0.94646	0.04697	0.99936	0.077334	0.96602	0.41809	0.22856
	contig03623	0.2228	0.58088	0.15138	0.85128	0.50217	0.10745	-0.18713	0.99997	0.23304	0.55049	-0.062317	0.93453	0.75879	0.0023915	0.073782	0.91593	0.22579	0.60596	-0.064067	0.95838	0.75068	0.0028533	-0.077592	0.94698	-0.20358	0.81183	-0.13643	0.99936	-0.08003	0.96809	0.21623	0.68914
leucine rich repeat containing 27	contig03634	0.33109	0.38281	0.39154	0.56721	0.41577	0.22673	0.25741	0.99651	0.41479	0.22723	0.26414	0.62735	0.6559	0.0118	0.35529	0.40317	0.1527	0.77524	0.21961	0.78246	0.6534	0.012308	0.26523	0.69671	-0.19514	0.83768	0.090039	0.99936	-0.38821	0.54322	0.32876	0.49616
	contig03638	0.14395	0.73625	0.22289	0.73903	0.44968	0.12466	0.060847	0.99997	0.31806	0.31211	-0.070538	0.91776	0.71217	0.0022817	0.27577	0.48622	0.07636	0.88598	0.14726	0.85378	0.63187	0.0063907	0.090003	0.92905	0.19727	0.79633	0.17069	0.97807	-0.027614	0.9899	0.33701	0.39657
	contig03643	0.31569	0.42671	-0.027014	0.98152	0.082902	0.86819	-0.51166	0.61047	-0.053797	0.92681	-0.046653	0.95687	0.30251	0.28574	-0.50878	0.18611	0.080298	0.89846	-0.39991	0.49497	0.65418	0.014359	-0.32043	0.61512	-0.15171	0.88886	-0.32614	0.828	-0.0085042	0.99878	0.18557	0.77164
adenosine kinase	contig03650	0.69619	0.36454	0.17673	0.92821	0.57317	0.45984	0.50228	0.99779	0.13094	0.90907	0.50902	0.65413	0.93079	0.083679	0.36214	0.75745	0.20382	0.86566	0.27654	0.8922	1.1992	0.023873	0.55273	0.68655	0.62341	0.65996	0.76782	0.71254	0.94846	0.39533	0.91617	0.28808
isoform b	contig03651	0.96068	0.061617	0.36776	0.75575	0.91297	0.073775	0.073451	0.99997	1.2694	0.0082399	0.14027	0.90523	1.7087	9.1496e-05	0.18044	0.86452	1.107	0.028137	0.10937	0.95615	1.5524	0.00036649	0.046932	0.9839	0.15071	0.93794	-0.25461	0.99573	0.50384	0.67699	0.13537	0.90924
kdel (lys-asp-glu-leu) endoplasmic reticulum protein retention receptor 2	contig03652	0.083913	0.83218	0.17459	0.75582	0.093197	0.77951	0.0029462	0.99997	0.22993	0.41054	-0.11369	0.81288	0.57222	0.0032419	-0.078902	0.87824	0.22314	0.4763	0.10929	0.87553	0.54054	0.0054121	0.03681	0.97225	-0.32276	0.40938	-0.089182	0.99936	-0.25177	0.6435	0.05499	0.92627
upf0580 protein c15orf58 homolog	contig03658	0.16637	0.89354	1.7891	0.078483	0.27192	0.77497	1.3651	0.31824	0.52427	0.54677	1.5055	0.083129	1.0106	0.069443	1.622	0.024969	0.4059	0.69816	1.5284	0.10042	0.9564	0.085917	1.5329	0.079023	0.16853	0.95191	0.011053	0.99997	-0.15143	0.97337	0.25145	0.86495
	contig03660	0.15193	0.72249	0.38876	0.51481	0.5294	0.072874	0.14759	0.99997	0.15674	0.70562	0.26964	0.56541	0.53814	0.021469	0.55698	0.078156	0.1349	0.78003	0.32057	0.54708	0.61969	0.0084319	0.31514	0.54213	-0.005223	0.99641	0.148	0.99562	0.18875	0.8698	0.47852	0.1868
	contig03664	0.35087	0.32272	0.54254	0.34349	0.62296	0.050636	0.40139	0.79319	0.47415	0.13338	0.65765	0.099176	0.67354	0.0074388	0.61955	0.065844	0.13358	0.79841	0.42146	0.41714	0.63155	0.012034	0.6443	0.11497	0.12129	0.91352	0.22506	0.94613	0.34356	0.61412	0.73285	0.042098
	contig03666	-0.559	0.40859	0.19976	0.89926	-0.63687	0.31063	0.25214	0.99997	-0.2926	0.72333	0.20439	0.87242	-0.54207	0.26449	0.22971	0.84118	-0.020848	0.98605	0.082776	0.97262	-0.97131	0.034802	0.093351	0.9706	0.14572	0.94954	-0.1721	0.99936	0.46103	0.80412	-0.22556	0.85277
hypothetical protein BRAFLDRAFT_102195 [Branchiostoma floridae]	contig03671	0.62419	0.088919	0.58131	0.40184	0.18955	0.68495	0.33868	0.93972	0.81362	0.016632	0.23572	0.71681	0.81697	0.0046267	0.45519	0.30054	0.39807	0.35594	0.52786	0.35598	0.52307	0.070075	0.40721	0.50945	0.16993	0.88086	0.14621	0.99936	0.59392	0.26563	0.31836	0.57306
cofactor of brca1	contig03674	0.35912	0.56985	0.20956	0.87328	0.68461	0.17288	-0.16981	0.99997	0.66457	0.18482	0.50911	0.49151	0.82202	0.034842	0.17377	0.86416	0.83652	0.096532	0.25015	0.85216	0.84445	0.02982	0.35062	0.74962	1.348	0.024433	-0.12583	0.99936	0.2688	0.90635	-0.51716	0.45874
	contig03675	0.47399	0.076298	0.084617	0.90921	0.29732	0.29859	0.066076	0.99997	0.36309	0.17863	0.19715	0.66377	0.6628	0.0019269	-0.047548	0.9394	0.21184	0.55767	-0.014281	0.98807	0.57989	0.0061889	0.18587	0.75634	-0.45693	0.21555	0.19574	0.93674	-0.30846	0.55676	0.46024	0.1495
matrilin cartilage matrix protein	contig03683	0.82267	0.14116	0.72315	0.51064	0.43296	0.49832	0.00081991	0.99997	1.0981	0.032434	-0.1043	0.93862	0.93449	0.030093	-0.32042	0.72439	0.71625	0.23617	-0.11562	0.95662	0.73675	0.090775	-0.18879	0.91437	-0.12433	0.95641	-0.4549	0.90092	0.67174	0.50195	-0.33894	0.73072
dynactin 4 isoform 2	contig03688	1.0038	0.021797	0.29045	0.78167	0.84905	0.053792	0.33761	0.99651	0.7876	0.061754	-0.13062	0.89637	1.2129	0.00072565	0.07299	0.94394	0.64428	0.16898	0.32942	0.73701	1.0776	0.0024835	0.36162	0.68655	-0.15118	0.92527	0.32576	0.93583	-0.064908	0.98383	0.4585	0.4646
dynactin 4	contig03690	0.48463	0.4101	0.22536	0.86626	0.509	0.3617	0.19679	0.99997	0.49302	0.38949	0.1357	0.90745	0.80056	0.046478	0.43053	0.55037	0.38733	0.57853	-0.28763	0.82552	0.78961	0.049032	0.32571	0.78675	0.072006	0.9777	0.42982	0.89278	0.14884	0.964	0.74069	0.24177
guanine nucleotide exchange factor dbs	contig03694	-0.16593	0.85423	0.33864	0.79349	0.16212	0.83253	0.25927	0.99997	0.62586	0.27334	0.013738	0.99342	0.78021	0.069589	-0.011331	0.99364	0.69697	0.24585	0.19425	0.91152	0.88313	0.038022	0.28857	0.83576	-0.11223	0.96203	0.067003	0.99936	-0.12726	0.97087	0.43023	0.62329
cdc42 protein	contig03703	0.75285	0.021959	0.092047	0.92378	0.65431	0.048482	0.20146	0.99997	0.65291	0.036377	0.1906	0.75757	1.1691	4.7127e-05	0.37628	0.36799	0.76873	0.018027	0.099852	0.9305	1.1335	0.00011311	0.32924	0.58653	-0.19531	0.83768	0.66998	0.20842	-0.065496	0.97659	0.84245	0.023907
	contig03704	0.55421	0.062763	0.28922	0.64793	0.5158	0.082517	0.10415	0.99997	0.41505	0.1671	0.17812	0.74581	0.71523	0.002636	0.40373	0.24941	0.18316	0.67512	0.18633	0.79896	0.70447	0.0032197	0.1742	0.81391	-0.32432	0.55037	0.13794	0.99831	-0.10947	0.94899	0.50158	0.16217
cdc42 protein	contig03705	0.86305	0.04924	0.3312	0.74166	0.70837	0.10673	0.3197	0.99779	0.82608	0.047971	0.40355	0.55917	1.2719	0.00043223	0.6789	0.17108	0.45426	0.39704	0.39628	0.65534	1.1482	0.0014156	0.36811	0.67773	-0.23886	0.85335	0.94094	0.16787	-0.3398	0.81512	1.3081	0.0099868
glucosaminyl (n-acetyl) transferase i-branching enzyme (i blood group)	contig03706	-0.012213	0.98442	0.31981	0.60127	0.39523	0.1909	-0.13833	0.99997	0.12528	0.7753	0.078114	0.90923	0.59851	0.010162	0.25193	0.54662	0.11208	0.82221	0.033781	0.97772	0.67193	0.004419	0.02928	0.98287	0.091999	0.93339	-0.051911	0.99936	-0.083668	0.96555	0.21362	0.66935
	contig03711	-0.19574	0.55685	0.28523	0.59972	0.15286	0.64122	0.02029	0.99997	0.12299	0.74528	0.25599	0.52437	0.41475	0.046055	0.26731	0.43906	0.1839	0.61904	0.3538	0.40478	0.31373	0.13829	0.2992	0.50096	0.036028	0.97827	-0.045655	0.99936	-0.045011	0.98052	0.10981	0.83681
alpha 1a	contig03712	2.2726	0.020795	0.57113	0.81552	1.6549	0.094465	0.45824	0.99997	3.0254	0.0016444	0.21116	0.92902	3.6415	2.9623e-05	0.00014346	0.99995	2.635	0.0072472	0.26007	0.94239	3.0078	0.00035601	0.46684	0.8661	1.1741	0.4932	-0.11495	0.99936	1.9925	0.12564	0.24743	0.9162
alpha 1a	contig03714	2.0977	0.013145	0.048922	0.98627	1.7249	0.044578	0.20475	0.99997	2.6867	0.001351	-0.23049	0.90681	3.1781	2.6397e-05	-0.33378	0.84345	2.3594	0.0053413	-0.18511	0.95554	2.5564	0.00041247	0.017657	0.99676	1.024	0.48613	-0.30155	0.99936	1.7385	0.12137	0.1137	0.96199
	contig03721	1.3024	0.00068395	0.74854	0.22615	1.0243	0.0092697	0.71545	0.33604	1.4	0.00024347	0.88692	0.05105	1.9183	3.7164e-07	0.73869	0.06047	1.4979	0.00010242	0.71258	0.16396	1.7261	3.6872e-06	0.78673	0.095029	0.29385	0.73644	0.3725	0.80439	0.46193	0.49767	0.75107	0.079496
	contig03723	1.3284	0.00049185	0.62692	0.34503	1.0417	0.008393	0.48608	0.75953	1.3473	0.00030824	0.5698	0.2375	1.9337	3.5353e-07	0.51883	0.22439	1.2973	0.00047078	0.39283	0.55595	1.6628	5.3655e-06	0.48408	0.40873	0.30546	0.7163	0.16214	0.99936	0.46151	0.49112	0.44843	0.36267
phosphatidylethanolamine-binding protein	contig03725	0.83725	0.10496	-0.05711	0.97443	0.87321	0.086194	0.22293	0.99997	0.44793	0.45518	-0.2629	0.78657	1.0256	0.010742	0.23322	0.80614	0.23746	0.77271	0.35447	0.76494	0.50871	0.22564	0.011501	0.99638	0.23795	0.88096	0.50697	0.80807	0.0073845	0.99945	0.6246	0.35755
pdgf- and vegf-related factor 1-like	contig03730	1.6316	0.079166	0.73559	0.75612	2.2291	0.032483	0.27369	0.99997	0.96653	0.33802	1.0081	0.52214	1.6963	0.019986	0.12265	0.95863	1.3909	0.15172	1.4445	0.37922	1.8747	0.021402	0.58933	0.82027	1.0734	0.58148	-0.72571	0.92203	0.56709	0.90491	-0.48629	0.78176
phytanoyl- hydroxylase-interacting protein	contig03735	0.87324	0.5099	1.8208	0.35005	0.53894	0.69894	0.16242	0.99997	0.92137	0.47191	1.5844	0.26817	2.3462	0.0059374	-0.10743	0.96507	1.5296	0.18611	1.1822	0.53764	0.80645	0.3802	0.55394	0.84761	-0.2494	0.9549	1.084	0.80088	-0.32509	0.96261	0.56362	0.78452
ring finger protein 19a	contig03736	0.75749	0.12909	0.17192	0.89604	0.026861	0.97479	0.095352	0.99997	0.62076	0.22015	-0.058621	0.96289	0.99762	0.0097383	0.11264	0.91893	0.67353	0.20411	0.23021	0.86707	1.1368	0.0037236	0.19271	0.89462	-0.84127	0.21355	0.34713	0.94527	-0.74166	0.326	0.43867	0.55887
short chain dehydrogenase reductase family member 5	contig03742	1.5711	0.00043537	-0.090209	0.94609	1.0742	0.015012	0.078392	0.99997	1.2254	0.0028051	-0.5394	0.36363	1.6484	1.7751e-05	-0.6665	0.16746	0.72437	0.098353	-0.35355	0.69483	1.6259	4.2032e-05	-0.33133	0.71484	-0.97412	0.070387	-0.15208	0.99936	-0.74716	0.21945	0.033397	0.98064
short chain dehydrogenase reductase family member 5	contig03744	1.228	0.0013822	0.066701	0.95726	0.68543	0.068101	-0.0096948	0.99997	0.73843	0.038115	-0.4931	0.34163	1.1614	0.00022314	-0.47908	0.29273	0.55461	0.16696	-0.35322	0.63395	1.1413	0.00036748	0.020941	0.99064	-0.47745	0.44326	-0.027403	0.99936	-0.15344	0.94374	0.20672	0.77184
palmitoyltransferase zdhhc17	contig03757	-0.36083	0.69776	0.30862	0.83793	0.58311	0.43785	0.66923	0.85886	0.59078	0.44316	1.0473	0.16183	1.0937	0.036115	0.70798	0.33034	0.71112	0.3657	1.0364	0.22366	1.0296	0.048699	0.72781	0.44758	1.2059	0.11422	0.561	0.83544	0.9466	0.27921	1.1148	0.10687
adp-ribosylation factor 1	contig03760	1.0896	0.0024727	0.2579	0.75105	0.9364	0.011993	0.066798	0.99997	0.97768	0.0037971	-0.24248	0.6986	1.3277	2.552e-05	-0.20318	0.73694	0.86601	0.013394	0.042595	0.97704	1.3342	4.8502e-05	-0.022729	0.98988	-0.36973	0.58554	0.1665	0.99831	-0.43849	0.50195	0.301	0.59408
adp-ribosylation factor 1	contig03762	0.85885	0.0047769	0.20085	0.78007	0.60002	0.04818	-0.064967	0.99997	0.69116	0.014595	-0.39901	0.33802	0.93484	0.0002176	-0.30899	0.43956	0.66352	0.026054	-0.080387	0.94175	0.9116	0.00038729	0.043861	0.97386	-0.41252	0.38922	0.082187	0.99936	-0.15359	0.9194	0.14554	0.80577
aaa atpase domain containing protein	contig03763	0.70375	0.21413	-0.056456	0.97656	0.15963	0.85389	0.18167	0.99997	1.2342	0.013451	0.78677	0.26817	1.3056	0.0023147	0.096649	0.93891	1.4194	0.0074382	0.15245	0.93736	1.3279	0.0022073	0.45768	0.6672	-0.703	0.41488	0.1682	0.99936	-0.21724	0.94374	0.19969	0.85991
ankyrin repeat protein	contig03764	0.56128	0.20404	0.21134	0.84351	0.46578	0.30087	0.17929	0.99997	1.1337	0.0041805	0.34514	0.61417	1.265	0.00027318	0.25935	0.70532	1.0847	0.0086471	-0.19058	0.87357	1.2152	0.00053705	0.14912	0.9108	-0.61834	0.32248	-0.1544	0.99936	-0.66119	0.29432	0.18887	0.82032
aaa atpase domain containing protein	contig03765	1.0141	0.036154	0.19431	0.88246	0.43037	0.43685	0.026056	0.99997	1.3794	0.0029667	0.22901	0.81075	1.6621	6.7978e-05	0.053991	0.96118	1.3064	0.0065805	-0.34888	0.75266	1.4262	0.00048337	-0.025068	0.99132	-0.58193	0.48539	-0.28616	0.97773	-0.29818	0.87998	0.10812	0.92764
sortilin 1	contig03767	0.031515	0.9783	0.39298	0.76089	0.70929	0.21893	0.24358	0.99997	0.89602	0.097951	0.30951	0.76744	1.2506	0.0046213	0.26614	0.7942	1.2916	0.018027	0.62284	0.52513	1.3859	0.0021261	0.51509	0.62651	0.83182	0.3114	-0.028346	0.99936	0.32982	0.88993	-0.0088698	0.99569
	contig03768	-0.70062	0.23608	0.24704	0.86559	0.25124	0.73176	0.31536	0.99997	0.63241	0.28199	0.31715	0.75851	0.79155	0.072591	0.092806	0.94336	0.79101	0.18162	0.49619	0.65721	1.0022	0.021412	0.4891	0.64888	0.78306	0.35675	0.078698	0.99936	0.54437	0.67499	0.42719	0.63886
	contig03769	1.2748	0.004082	0.36245	0.71726	0.80288	0.067916	0.38784	0.96448	1.1198	0.0066967	0.59712	0.32077	1.3898	0.00017313	0.99117	0.031095	0.8993	0.039125	0.46348	0.56894	1.2815	0.00053825	0.57771	0.41165	0.10667	0.95191	0.51743	0.68761	0.1865	0.93906	0.8419	0.10267
	contig03770	0.48105	0.063375	0.37191	0.46455	0.60039	0.022963	0.36027	0.6985	0.64503	0.0078462	0.23436	0.568	0.94208	3.3399e-05	0.53081	0.05085	0.57794	0.023228	0.45487	0.22366	0.9638	5.199e-05	0.38275	0.31398	0.26911	0.58469	0.16224	0.96632	0.37231	0.3777	0.52553	0.077282
	contig03777	0.92321	0.0082331	0.29608	0.71011	0.70941	0.045126	-0.088932	0.99997	1.0852	0.0015919	0.11786	0.87994	1.3892	1.3698e-05	0.27252	0.59805	0.79612	0.021696	0.24141	0.77126	1.2625	7.5174e-05	0.26985	0.71896	0.062947	0.96863	0.076419	0.99936	0.5758	0.2668	0.44251	0.344
	contig03786	1.5229	0.0028789	-0.45313	0.68436	0.95315	0.059806	-0.087271	0.99997	1.5476	0.0016444	-0.5102	0.50466	1.9027	2.365e-05	-0.89381	0.10421	1.6757	0.00093088	-0.4684	0.64068	1.862	5.841e-05	-0.033304	0.98939	0.27126	0.85506	-0.18644	0.99936	0.63666	0.49021	-0.1867	0.86115
	contig03787	1.6391	0.075111	0.77054	0.70918	1.341	0.14873	-0.29987	0.99997	1.6178	0.0654	-0.033406	0.98973	1.4815	0.041391	-0.064461	0.97566	0.85015	0.46864	-0.15452	0.9653	1.4152	0.051322	0.52723	0.81935	-0.53959	0.83841	0.6991	0.93137	-0.17327	0.97819	0.68362	0.65718
	contig03788	0.79705	0.1616	-0.39602	0.7529	1.031	0.060061	-0.13583	0.99997	0.60989	0.30091	-0.12149	0.92588	0.80751	0.065049	-0.45132	0.56804	0.24858	0.78051	-0.62863	0.51316	1.0811	0.012713	-0.19145	0.91358	-0.13826	0.94898	0.2039	0.99936	0.0084523	0.99945	0.74443	0.29151
ring-box protein 2	contig03789	0.92131	0.039064	0.33077	0.74587	0.83682	0.060892	-0.16453	0.99997	0.91571	0.02974	-0.15974	0.86851	0.88064	0.012626	-0.37752	0.55403	0.50581	0.33353	-0.14513	0.92365	1.2743	0.00064404	0.061343	0.97523	-0.34989	0.74123	-0.063556	0.99936	-0.015797	0.99758	0.26499	0.74606
esf1 homolog	contig03791	0.53265	0.52978	0.1861	0.92477	0.46763	0.56783	0.16807	0.99997	-0.18013	0.87248	0.2041	0.89432	0.64649	0.25145	0.46915	0.65483	-0.23402	0.84276	-0.001335	0.9992	1.7542	0.0015806	0.20051	0.93401	-0.48523	0.7768	0.14764	0.99936	-0.29535	0.93638	0.34303	0.793
	contig03793	0.19153	0.72192	-0.131	0.89604	0.32423	0.44813	-0.23485	0.99997	0.19937	0.70087	-0.73688	0.11546	0.38859	0.20492	-0.89889	0.019894	0.23302	0.66848	-0.52586	0.37358	0.50862	0.087565	-0.50136	0.39396	-0.1111	0.93705	-0.72764	0.23684	0.097821	0.96809	-0.31373	0.59635
PREDICTED: roundabout-like [Saccoglossus kowalevskii]	contig03795	0.93637	0.097724	-0.34756	0.7944	0.6713	0.25221	0.089384	0.99997	0.95101	0.076398	-0.83289	0.25853	1.1055	0.011947	-0.98704	0.10235	0.79122	0.18686	-1.1671	0.12352	1.0002	0.022888	-0.69785	0.43877	0.39364	0.78094	-0.58692	0.76703	0.69365	0.4958	-0.059417	0.97193
phospho-2-dehydro-3-heoxyheptonate aldolase	contig03796	0.30773	0.30572	0.098726	0.89273	0.189	0.56311	-0.099614	0.99997	0.25546	0.41234	-0.3559	0.34051	0.70544	0.0012871	-0.34321	0.29517	0.12792	0.77005	-0.28704	0.56355	0.58039	0.0071401	-0.25468	0.6208	-0.24076	0.68556	-0.31631	0.69356	-0.092875	0.95467	-0.16269	0.74302
translation initiation factor helicase	contig03800	0.35241	0.49715	0.58007	0.4921	0.53389	0.22823	0.20001	0.99997	0.43356	0.35709	-0.033839	0.97668	0.86645	0.0098689	-0.020863	0.98391	0.32298	0.5819	0.19745	0.86986	1.0724	0.0019255	0.1356	0.92493	0.035705	0.98711	-0.10506	0.99936	-0.53147	0.49329	0.15803	0.86026
transcriptional regulator	contig03802	3.6822	0.10557	1.3067	0.81309	2.5221	0.2943	1.6465	0.99779	5.5497	0.0082399	1.4511	0.71881	7.6769	6.7978e-05	1.4769	0.6791	5.3649	0.015043	1.5728	0.76271	5.5041	0.0024342	1.6038	0.74761	3.5099	0.27571	-0.083066	0.99936	3.9676	0.20875	0.34294	0.95479
regulatory p domain of the subtilisin-like proprotein convertases and other protease	contig03803	2.5422	0.15194	0.81303	0.85678	1.6972	0.37172	0.94128	0.99997	3.9143	0.014734	0.90952	0.78084	5.396	0.00017708	0.90257	0.76569	4.0482	0.016639	0.8331	0.86075	3.8992	0.0045761	0.97611	0.82386	2.8861	0.22901	-0.13386	0.99936	3.8305	0.078833	0.29871	0.94666
regulatory p domain of the subtilisin-like proprotein convertases and other protease	contig03804	1.5722	0.43775	0.68293	0.88255	1.8961	0.30525	0.98282	0.99997	4.2719	0.0078684	0.74006	0.82922	5.7328	8.8844e-05	0.70951	0.83091	4.1435	0.014072	0.76812	0.87561	4.0199	0.0035257	0.79075	0.86877	2.5533	0.31729	-0.20999	0.99936	3.4065	0.13176	0.25116	0.95765
	contig03811	0.7149	0.092124	0.51809	0.54102	0.47745	0.28561	0.047566	0.99997	0.81855	0.038517	0.54195	0.3475	1.1358	0.00085645	-0.20954	0.77994	0.67204	0.12152	0.087417	0.95764	1.0711	0.0017368	0.095634	0.9527	-0.3935	0.65088	-0.44036	0.7689	-0.37571	0.73418	-0.010912	0.99318
	contig03812	0.8158	0.037321	0.32241	0.71726	0.19353	0.70456	0.14325	0.99997	0.7661	0.038893	0.18855	0.80626	1.0192	0.001315	0.042458	0.96214	0.58074	0.16425	0.2625	0.7808	1.1943	0.00035533	0.32771	0.68018	-0.31994	0.72401	-0.3537	0.8663	0.0027455	0.99945	0.15238	0.85216
	contig03813	1.1431	0.07215	0.73081	0.57715	0.66425	0.33559	-0.30906	0.99997	0.84071	0.19415	-0.12088	0.93862	1.0188	0.042229	-0.48515	0.60235	0.5893	0.46588	0.074184	0.97704	1.109	0.0263	-0.26776	0.88431	-0.31155	0.87364	-0.41407	0.95964	-0.18189	0.96554	0.11339	0.94522
	contig03815	-0.048223	0.93597	0.027257	0.9801	-0.0018531	0.99751	-0.37944	0.82142	0.029588	0.95831	-0.56383	0.15241	0.30216	0.24193	-0.70528	0.029497	-0.041802	0.94602	-0.39929	0.43805	0.32711	0.20077	-0.40724	0.4127	-0.36079	0.50885	-0.41188	0.59471	-0.17822	0.89766	-0.30749	0.50264
	contig03821	0.3717	0.45696	0.075231	0.95676	0.43972	0.33751	-0.27163	0.99997	0.34546	0.49636	-0.54789	0.34298	0.49146	0.14949	-0.59156	0.22522	0.18902	0.78222	-0.38113	0.65223	0.76242	0.021428	-0.23058	0.83182	-0.60564	0.3414	-0.057064	0.99936	-0.35198	0.7736	0.19813	0.81061
mitochondrial ribosomal protein l48	contig03823	0.58431	0.03276	0.024825	0.9792	0.46587	0.090445	-0.26359	0.92996	0.26707	0.39073	-0.43112	0.22961	0.52898	0.014813	-0.29009	0.41688	0.14757	0.72752	-0.17223	0.79904	0.66932	0.0025957	-0.0613	0.95427	-0.31813	0.50861	0.13506	0.99573	-0.1813	0.85715	0.35939	0.31528
chloride intracellular channel 4	contig03826	0.038699	0.98108	-0.27597	0.8976	-0.071124	0.95677	0.2261	0.99997	0.25706	0.83722	-0.49053	0.73594	-0.14495	0.8567	-0.051236	0.97775	0.56212	0.61498	-0.57142	0.75254	1.7745	0.0051471	-0.1273	0.97058	0.70936	0.68126	-0.16992	0.99936	0.65475	0.78238	0.0096252	0.99694
	contig03833	0.274	0.41732	0.31881	0.5952	0.40504	0.17027	0.075708	0.99997	0.26569	0.42837	0.023277	0.97668	0.76287	0.0011346	0.51715	0.099121	0.25004	0.51227	0.29673	0.58248	0.81501	0.00072313	0.18305	0.79217	0.081211	0.9413	0.24677	0.89265	0.30595	0.63029	0.49971	0.15017
receptor-type tyrosine-protein phosphatase kappa	contig03834	0.29609	0.36592	0.40923	0.46829	0.52242	0.067449	0.23809	0.98315	0.43324	0.1271	0.24881	0.58979	0.93041	0.00012375	0.57612	0.056724	0.39212	0.20969	0.3258	0.51907	0.86466	0.00037779	0.32667	0.5031	0.12215	0.89771	0.23587	0.90569	-0.016001	0.99483	0.42408	0.23597
	contig03835	0.048032	0.92182	0.27269	0.61606	0.25289	0.38346	0.18593	0.99997	0.30558	0.26928	0.12372	0.80944	0.64376	0.0020986	0.35977	0.23881	0.2101	0.55177	0.048563	0.96264	0.57305	0.00583	0.31837	0.45565	0.17478	0.8005	0.028725	0.99936	-0.099298	0.94688	0.31215	0.37597
hedgehog acyltransferase	contig03836	0.37047	0.17019	0.32288	0.53963	0.30611	0.2642	0.23347	0.955	0.41562	0.10028	0.21256	0.61768	0.78534	0.00026778	0.50945	0.063461	0.26393	0.40811	0.3291	0.4457	0.69548	0.001121	0.25458	0.5938	0.026341	0.98381	0.13224	0.9929	-0.12489	0.92636	0.38081	0.24011
	contig03837	0.3664	0.26797	0.30604	0.62965	0.24982	0.47873	-0.1071	0.99997	0.34265	0.29092	0.069582	0.92241	0.6828	0.0046275	-0.22965	0.60874	0.13349	0.78824	-0.071722	0.9499	0.50414	0.035399	-0.16756	0.83114	0.054442	0.96842	-0.16917	0.98205	-0.26108	0.75814	0.14488	0.80733
molting fluid carboxypeptidase a	contig03841	0.96831	0.4213	0.11993	0.96353	1.1648	0.37677	1.2121	0.57941	2.098	0.033511	0.91883	0.39801	2.2841	0.0039245	0.77113	0.44958	1.6933	0.11432	0.75323	0.60419	2.2898	0.0062415	1.3466	0.20609	1.2953	0.23305	-0.41609	0.97131	1.0106	0.67856	-0.13354	0.93756
btb poz domain containing protein	contig03844	0.80285	0.34506	-0.7585	0.59479	0.19178	0.84553	-0.23877	0.99997	0.85779	0.23231	0.071333	0.96429	1.0282	0.060915	-0.25264	0.83247	0.89216	0.24448	-0.15362	0.94579	1.2563	0.020916	-0.029262	0.99186	0.50857	0.71784	0.53734	0.87833	0.82894	0.4319	0.37378	0.73756
amp-dependent synthetase and ligase	contig03856	0.14078	0.83029	0.58526	0.46101	0.2629	0.5935	0.212	0.99997	0.45292	0.29652	-0.006938	0.99491	0.88605	0.0057941	0.0027942	0.99878	0.41582	0.40209	0.15613	0.90179	0.65435	0.040896	-0.10939	0.94205	-0.25651	0.8187	-0.13619	0.99936	-0.31112	0.81669	-0.033189	0.97894
firefly luciferase	contig03857	2.0649	9.8716e-05	1.6169	0.023725	1.4858	0.0043732	1.4412	0.02645	1.2371	0.0065237	1.0183	0.093579	1.9158	1.342e-05	0.90297	0.082116	1.1958	0.012185	1.258	0.038958	1.7861	5.8218e-05	1.0073	0.10228	0.42149	0.69444	0.93456	0.24812	0.78069	0.27809	1.3807	0.012781
protein	contig03858	0.81909	0.063938	0.57211	0.5187	0.45242	0.34989	0.42022	0.93179	0.97324	0.018625	-0.08348	0.93922	1.3316	0.00027879	-0.18509	0.82772	0.81975	0.064213	0.05778	0.9749	1.1673	0.0012739	-0.021957	0.99176	0.12061	0.94308	-0.37107	0.89758	-0.050479	0.98809	-0.14546	0.87935
	contig03859	0.81449	0.38472	0.49581	0.80186	0.062265	0.96349	-0.25809	0.99997	0.84023	0.35051	0.15586	0.93862	1.1976	0.065296	0.18959	0.9177	0.60592	0.59287	0.88594	0.54434	1.4738	0.021854	0.31081	0.90062	-0.3072	0.91499	-0.80424	0.81303	0.30201	0.94846	-0.19957	0.91821
	contig03861	0.70479	0.3245	0.14625	0.93924	0.027262	0.98064	0.10756	0.99997	0.55873	0.46013	0.26551	0.83952	1.0902	0.031207	0.32423	0.77663	0.36024	0.71111	0.89614	0.37947	1.3537	0.0077601	-0.01511	0.99626	-0.29516	0.88369	-0.45034	0.94855	0.16797	0.96809	0.10575	0.95056
abhydrolase domain containing 6	contig03862	0.91589	0.029445	-0.16155	0.88858	0.73624	0.080215	-0.031197	0.99997	0.80275	0.044891	-0.48675	0.42432	1.2301	0.00040966	-0.63197	0.18845	0.55836	0.23113	-0.41381	0.60419	1.1217	0.0012316	-0.37233	0.6511	-0.071456	0.97098	-0.26125	0.96937	-0.03564	0.99122	-0.1212	0.89908
abhydrolase domain containing 6	contig03864	0.77517	0.059938	-0.079483	0.95244	0.93695	0.024687	0.10623	0.99997	0.97788	0.010962	-0.38909	0.54119	1.3833	8.1699e-05	-0.33972	0.56527	0.70867	0.09129	0.024085	0.98736	1.2777	0.0002849	-0.18521	0.87302	-0.43	0.57969	-0.13029	0.99936	-0.3941	0.69205	0.20028	0.80236
proto-oncogene serine threonine-protein kinase pim-1	contig03868	0.78671	0.082043	0.84809	0.26168	0.63754	0.16289	0.18424	0.99997	0.88416	0.036659	0.01414	0.99122	1.1391	0.001615	-0.15922	0.86337	0.89331	0.044935	-0.0040525	0.99774	1.0068	0.0049861	0.011507	0.99565	0.40143	0.67992	0.031504	0.99936	0.079303	0.98028	-0.11852	0.90923
a chain discovery of 3h-benzo pyrimidin-4-ones as highly selective and orally bioavailable pim kinases inhibitors	contig03869	0.32849	0.50195	0.27893	0.76561	-0.069313	0.91137	-0.17515	0.99997	0.55663	0.16726	-0.017898	0.9866	0.63341	0.045441	-0.37209	0.4944	0.33991	0.5204	-0.18503	0.87035	0.43608	0.18019	0.23448	0.81299	-0.0070025	0.99641	-0.46346	0.6952	0.5264	0.44866	-0.18522	0.81509
non-specific lipid transfer protein	contig03886	0.69658	0.077033	-0.21905	0.82368	0.6193	0.11527	-0.070918	0.99997	0.68446	0.068576	-0.34198	0.58789	0.79745	0.010034	-0.53063	0.25127	0.13937	0.83676	-0.37198	0.62457	0.44335	0.16391	-0.41506	0.5451	-0.28982	0.76164	-0.67234	0.35879	-0.21235	0.90784	-0.37574	0.52
	contig03890	0.40557	0.25223	0.10948	0.9031	0.68495	0.037448	-0.085751	0.99997	0.30968	0.40988	0.008056	0.99379	0.73298	0.004848	0.12094	0.85416	0.12597	0.81959	0.069429	0.95666	0.79747	0.0026009	0.14273	0.8787	-0.21592	0.80723	0.24573	0.93393	0.27649	0.76909	0.5106	0.20721
radixin	contig03895	1.3676	0.03587	0.67508	0.62203	0.33449	0.69208	0.026549	0.99997	0.81423	0.23294	-0.061416	0.97196	0.75704	0.15438	-0.2406	0.85478	0.30748	0.77062	-0.14513	0.95311	0.71769	0.17822	-0.13089	0.96005	0.36298	0.84977	-0.10695	0.99936	-0.4352	0.85552	0.23344	0.86638
casc1 protein	contig03898	0.16667	0.65725	0.25343	0.67543	0.44928	0.10403	0.13544	0.99997	0.28698	0.34654	0.21994	0.63116	0.50967	0.019554	0.41776	0.18377	0.0654	0.89901	0.30496	0.53659	0.47945	0.028049	0.35275	0.4292	-0.10432	0.91499	0.52539	0.26544	0.063565	0.97192	0.8599	0.0078333
trna-specific adenosine deaminase 2	contig03900	0.5718	0.10618	0.11741	0.90152	0.32965	0.39867	0.088805	0.99997	0.29738	0.47484	0.24753	0.68221	0.49331	0.076727	0.52743	0.18318	0.10298	0.86887	0.42977	0.46546	0.40787	0.14885	0.30188	0.66145	-0.15717	0.8881	0.48824	0.54828	-0.01531	0.99643	0.79246	0.045466
	contig03908	-1.6129	0.031056	-0.010111	0.99636	-0.27377	0.79121	-0.06966	0.99997	-0.25876	0.82395	0.07196	0.97111	0.10924	0.88893	0.53497	0.63878	0.34746	0.77449	0.94565	0.44892	0.64987	0.30039	0.073931	0.98301	0.4962	0.80589	-0.47959	0.96398	0.70108	0.77442	-0.0035345	0.9986
	contig03910	1.2009	0.00088906	0.56872	0.39564	1.1632	0.0025719	0.39515	0.86931	1.11	0.001351	0.033705	0.9712	1.6617	1.6236e-06	0.16171	0.80669	1.0043	0.0041468	0.22725	0.79029	1.6012	5.3655e-06	0.20574	0.81596	-0.089841	0.9482	0.14432	0.99936	-0.022088	0.99395	0.28078	0.62531
	contig03912	1.0783	0.0064304	0.60184	0.43627	1.1455	0.0077349	0.21616	0.99997	1.0037	0.0068251	0.04731	0.96289	1.4272	3.8534e-05	0.24748	0.70278	1.0661	0.006617	0.22869	0.82045	1.3726	0.00010396	0.36095	0.63605	-0.10962	0.94248	0.27321	0.95049	0.14217	0.9523	0.2286	0.75493
coiled-coil domain-containing protein 148-like isoform 1	contig03914	0.25282	0.80834	0.67209	0.6251	-0.34021	0.68893	0.34198	0.99997	-0.53124	0.50838	0.58855	0.5765	-0.3086	0.61007	-0.096232	0.95054	-0.41878	0.66194	0.34673	0.84636	0.091462	0.89087	0.53089	0.69563	-1.2766	0.14315	0.87692	0.59216	-1.713	0.026763	0.71311	0.43983
nuclear cap-binding protein subunit 1	contig03927	0.76041	0.60432	0.73751	0.71207	1.0587	0.25752	0.20661	0.99997	0.63619	0.51032	-0.62033	0.68689	1.2106	0.088686	0.045633	0.98444	0.96747	0.28369	0.35377	0.90963	1.3914	0.027025	0.11212	0.97717	-0.58171	0.76545	-0.51173	0.96159	-0.65424	0.78115	0.012575	0.99569
short-chain dehydrogenase reductase sdr	contig03938	0.78464	0.16383	0.3839	0.76089	1.0378	0.055705	0.50727	0.93972	1.0625	0.038183	0.49125	0.56868	1.1153	0.0093684	0.31247	0.7332	1.0407	0.054892	0.30991	0.82343	1.2278	0.0047076	0.73266	0.39149	-0.40969	0.7533	0.30429	0.98134	0.0098556	0.99945	0.64336	0.38235
leucine-rich repeats and guanylate kinase domain containing	contig03940	-0.37745	0.41888	-0.04971	0.97226	0.14252	0.79772	0.030724	0.99997	0.66406	0.086742	-0.30137	0.65549	0.8414	0.0078554	-0.41529	0.42712	0.63265	0.12859	-0.00025257	0.99966	0.80263	0.011267	-0.21407	0.83576	0.11214	0.9413	-0.18209	0.99869	0.052081	0.9861	0.16611	0.83913
leucine-rich repeats and guanylate kinase domain containing	contig03941	-0.80113	0.15859	0.31728	0.81459	-0.054919	0.95132	-0.33681	0.99997	0.65623	0.25703	-0.50292	0.55984	0.9643	0.025996	-0.4811	0.52998	1.0366	0.059084	-0.041522	0.98523	0.87582	0.04345	-0.12784	0.95139	1.0847	0.13366	-0.74746	0.57392	-0.056661	0.98889	-0.54214	0.50084
protein	contig03946	0.12754	0.84948	0.33617	0.71267	0.15311	0.78158	0.21992	0.99997	0.33951	0.4831	0.88297	0.078899	0.39579	0.23675	0.86555	0.04046	0.0092938	0.99131	0.54374	0.4075	0.30027	0.38549	0.75697	0.15713	0.1071	0.94437	0.3499	0.88306	0.17422	0.93738	0.67251	0.16966
low quality protein: tyrosine-protein phosphatase non-receptor type 13	contig03952	0.44267	0.45585	0.56795	0.5822	0.60452	0.24953	-0.059081	0.99997	0.41273	0.49328	-0.0022099	0.99843	1.0068	0.01071	0.20909	0.828	0.96011	0.053945	0.21647	0.88206	0.54511	0.18079	0.041489	0.98492	0.57134	0.51881	0.099756	0.99936	0.066751	0.9861	-0.2523	0.79304
atp h+ mitochondrial f1 alpha subunit cardiac muscle	contig03956	0.51405	0.065074	-0.10045	0.89336	0.40538	0.15005	-0.24538	0.96261	0.49409	0.063565	-0.5958	0.085208	0.7034	0.0016652	-0.59586	0.040362	0.15993	0.70253	-0.55455	0.14277	0.84711	0.0003453	-0.52431	0.15263	-0.47111	0.22266	-0.35847	0.61175	-0.19057	0.84824	0.18597	0.70478
eater	contig03958	1.7053	0.048445	0.40215	0.85899	1.6062	0.062672	-0.29935	0.99997	1.7002	0.037345	-0.68447	0.63446	1.55	0.023284	0.024647	0.99158	1.7397	0.04213	0.24653	0.93747	2.354	0.0009905	-0.24823	0.93642	0.15628	0.96842	-0.83708	0.82697	-0.20329	0.97116	-0.78728	0.55183
	contig03967	-0.069678	0.89722	0.25561	0.70714	0.21582	0.55113	0.011468	0.99997	0.23381	0.53065	-0.031798	0.96812	0.64191	0.0072554	0.38015	0.29787	0.23591	0.56717	0.14859	0.85909	0.61596	0.010034	0.067579	0.95427	0.32504	0.56149	-0.035692	0.99936	0.40867	0.42721	0.23369	0.63871
	contig03976	0.30286	0.56115	0.46816	0.58097	-0.15961	0.77427	0.28191	0.99997	0.24935	0.64945	0.22212	0.77377	0.34456	0.31814	0.085032	0.92833	0.031477	0.97122	0.21503	0.8464	0.61373	0.058464	0.14864	0.90838	-0.28821	0.78101	-0.15227	0.99936	-0.97847	0.04914	0.015337	0.99037
	contig03977	0.15364	0.78481	0.46677	0.52754	-0.035002	0.95393	0.24396	0.99997	0.011635	0.98726	0.11869	0.88569	0.1795	0.59319	0.080293	0.92429	-0.4385	0.29843	0.11799	0.92501	0.45887	0.12115	0.014954	0.99259	-0.34458	0.65366	-0.11901	0.99936	-0.88481	0.047974	0.14265	0.85217
beta 2c	contig03980	0.16309	0.79371	-0.08811	0.94228	0.59111	0.1468	-0.49258	0.81548	0.25677	0.62888	-0.41569	0.49151	0.57249	0.074605	-1.0088	0.015242	0.30365	0.58576	-0.66322	0.27006	0.52427	0.10369	-0.49211	0.45373	-0.16122	0.9085	-0.3809	0.83886	0.26395	0.85821	-0.20055	0.79586
	contig03982	-0.35407	0.66504	1.4107	0.12574	-0.19783	0.81443	1.2211	0.26603	0.22526	0.80361	1.4471	0.047598	0.62635	0.20166	1.8051	0.0031739	0.21535	0.83384	1.2447	0.12623	0.46583	0.35869	1.3702	0.062583	0.27007	0.88725	-0.024907	0.99936	-0.19348	0.95792	0.27554	0.81603
rna methyltransferase like 1	contig03984	0.088325	0.84117	0.14905	0.82411	0.18655	0.56193	-0.13621	0.99997	0.14303	0.70047	-0.0033553	0.9966	0.45945	0.029508	0.24614	0.50173	-0.011856	0.98341	-0.0046697	0.99651	0.52431	0.013013	0.017356	0.9897	-0.1488	0.84905	-0.036878	0.99936	-0.051671	0.97681	0.43127	0.1867
	contig03986	0.80123	0.38967	0.38173	0.85678	0.88698	0.30921	0.0055516	0.99997	1.3157	0.094686	0.18843	0.92056	1.3479	0.035429	0.1067	0.95416	1.0441	0.24757	0.1072	0.97478	1.5126	0.034409	0.33186	0.89097	0.4493	0.84977	0.26541	0.99936	0.79704	0.7441	0.37599	0.81439
d-3-phosphoglycerate dehydrogenase	contig03997	-0.10404	0.91928	0.095367	0.95736	0.37234	0.57222	0.23756	0.99997	0.22447	0.78314	0.87782	0.21634	0.92357	0.032417	1.2916	0.022449	0.7982	0.1701	0.89028	0.27914	0.84509	0.050906	0.93403	0.212	0.507	0.65924	0.49903	0.8607	0.10768	0.97659	0.96193	0.13887
d-3-phosphoglycerate dehydrogenase	contig03998	-0.12072	0.84406	0.31039	0.71026	0.073378	0.89763	-0.12878	0.99997	-0.13038	0.82011	0.24417	0.71269	0.51354	0.083624	0.56767	0.17689	0.32411	0.50555	0.4444	0.48759	0.58111	0.048009	0.35815	0.60412	0.28893	0.7422	0.12737	0.99936	0.49494	0.4394	0.52971	0.25703
	contig03999	0.36378	0.59287	0.56103	0.60563	0.47342	0.42418	0.43515	0.98204	0.2985	0.67609	0.7052	0.32143	1.1604	0.0051169	1.2027	0.02686	0.89715	0.092953	1.3478	0.04053	1.4987	0.00060337	0.8174	0.27371	0.38094	0.76888	0.78946	0.4746	0.35729	0.84859	1.4157	0.017838
chitinase 1	contig04000	0.38112	0.51334	-0.41316	0.6939	0.25568	0.66973	-0.74852	0.56175	0.54259	0.27989	-1.1983	0.036418	0.54071	0.15953	-1.6228	0.00101	0.42505	0.48746	-1.3059	0.025966	0.68344	0.068677	-1.1614	0.04424	-0.27253	0.84254	-1.0015	0.17476	0.24235	0.91643	-0.76776	0.18272
mgc80644 protein	contig04001	0.97309	0.11016	-0.6532	0.59972	0.74317	0.2359	-0.73302	0.81611	1.4279	0.010962	-1.5909	0.028043	1.2663	0.0076329	-1.9664	0.0015717	1.0879	0.072706	-1.4183	0.070319	1.2717	0.0076086	-1.3375	0.073287	-0.21785	0.91897	-1.2383	0.19658	0.38831	0.86435	-0.77763	0.32099
	contig04006	1.8683	0.011607	0.66333	0.68901	1.1227	0.13749	0.75195	0.91276	2.0194	0.0043134	0.32344	0.8292	2.6725	4.2333e-05	0.47317	0.69721	1.7038	0.020479	0.32074	0.88493	2.2328	0.00042188	0.52224	0.75686	0.56347	0.75402	-0.15745	0.99936	1.4079	0.16599	0.28896	0.85361
	contig04008	-0.70144	0.40838	-0.314	0.87157	-1.0053	0.17785	-0.43054	0.99997	-0.72577	0.37715	-0.522	0.68002	-1.0875	0.061849	-0.79422	0.39771	-0.88021	0.29105	-0.27965	0.90364	-1.177	0.041688	-0.44699	0.80275	-0.66283	0.67113	-0.49277	0.95527	-0.14512	0.97659	-0.47162	0.7183
-like protein subfamily c member 22	contig04010	0.86102	0.082367	0.27411	0.82411	0.67727	0.17705	0.56726	0.85146	0.30004	0.6492	0.86484	0.16612	0.68048	0.083586	0.77612	0.15938	0.21771	0.7867	0.53782	0.54048	1.3251	0.0010742	0.70569	0.33691	-0.26486	0.85432	0.24102	0.99573	-0.13166	0.9667	0.43608	0.56712
-like protein subfamily c member 22	contig04011	0.1576	0.81055	-0.041148	0.97782	-1.0146	0.017484	-1.1784	0.036939	0.57939	0.16729	0.16713	0.84668	0.67666	0.039739	0.048993	0.95863	0.48277	0.31474	-0.075535	0.96319	0.77462	0.018142	-0.027465	0.98912	0.13995	0.92598	0.0021488	0.99997	-0.68345	0.26039	0.020526	0.98736
	contig04015	0.27525	0.60211	0.45521	0.58474	0.79913	0.04801	0.030862	0.99997	0.36669	0.43407	0.33991	0.60603	0.6576	0.039527	-0.0182	0.98547	0.27317	0.63457	0.124	0.92839	0.825	0.0098073	0.34913	0.66089	-0.25969	0.81476	0.25218	0.96632	-0.26461	0.85826	0.030978	0.9812
actin-like 6a	contig04016	0.41993	0.45616	-0.12646	0.92728	0.59086	0.23291	-0.2116	0.99997	0.20761	0.76627	-0.38863	0.61766	0.62983	0.097556	-0.2916	0.70804	-0.22506	0.76807	-0.2187	0.8715	0.82865	0.026741	0.02684	0.99064	-0.29125	0.82751	0.050087	0.99936	-0.23322	0.92383	0.095027	0.93525
methionine gamma-lyase	contig04018	1.4322	0.05182	-0.76508	0.61879	1.0301	0.17027	-0.48997	0.99997	1.7951	0.0092973	-0.86813	0.40776	1.9378	0.0011481	-1.271	0.11332	1.8363	0.011101	-0.7357	0.59684	1.8046	0.002474	-0.62865	0.6691	0.86115	0.50184	-0.73225	0.80899	0.83957	0.56885	-0.36102	0.80068
methionine gamma-lyase	contig04019	0.79779	0.27795	-0.25191	0.89099	0.65292	0.3826	-0.0023576	0.99997	1.5715	0.012358	-0.29759	0.82359	1.8007	0.00096745	-0.52724	0.59066	1.2057	0.076574	-0.22117	0.92157	1.1346	0.032599	-0.1442	0.95687	0.035176	0.99196	-0.46437	0.95049	0.25813	0.94649	-0.010103	0.996
hemicentin 2	contig04025	0.84286	0.21071	0.50309	0.72848	1.6063	0.01442	0.64052	0.91194	1.5108	0.01107	0.6098	0.53493	1.8386	0.00043535	0.35918	0.74102	1.4907	0.01716	0.075562	0.97704	1.0696	0.033145	0.53422	0.67696	1.2181	0.14853	-0.56634	0.86964	1.3697	0.089684	-0.19255	0.89266
fms-related tyrosine kinase 1 (vascular endothelial growth factor vascular permeability factor receptor)	contig04033	0.95496	0.055756	0.054138	0.97558	0.79349	0.1125	-0.059232	0.99997	0.83417	0.084258	0.021061	0.9875	1.2778	0.0014882	0.071922	0.9508	0.69683	0.1969	0.02009	0.99073	1.3726	0.00089079	0.032735	0.98943	-0.1719	0.92511	0.17734	0.99936	-0.083241	0.9807	0.26231	0.78371
vacuolar protein sorting-associated protein 4b	contig04035	0.8959	0.1019	1.6099	0.037726	0.65352	0.24975	0.30639	0.99997	0.65788	0.24584	0.52229	0.53008	1.2182	0.0045452	0.34194	0.69626	0.86005	0.12505	0.25479	0.86703	0.76957	0.073519	0.37573	0.75792	-0.27825	0.864	-0.23935	0.99936	-0.32568	0.88495	0.0077714	0.99624
	contig04045	0.64347	0.013389	0.27653	0.61346	0.52906	0.045023	0.1022	0.99997	0.70169	0.0046615	0.03923	0.95283	1.0317	1.4181e-05	0.072766	0.90106	0.54364	0.035994	0.17309	0.78531	1.133	1.0346e-05	0.14291	0.83308	0.024461	0.98516	0.10942	0.99936	-0.0011918	0.99945	0.20008	0.64779
reverse transcriptase	contig04047	0.95613	0.081525	-0.13086	0.93551	0.68648	0.22642	-0.19964	0.99997	0.63142	0.27426	0.14782	0.90589	0.97918	0.022814	-0.28012	0.77163	0.66637	0.28126	-0.097592	0.96367	0.88107	0.04067	0.21318	0.89568	-0.095467	0.96955	0.029389	0.99936	0.35161	0.86469	0.28725	0.78287
coiled-coil-helix-coiled-coil-helix domain-containing protein 8	contig04051	-0.21193	0.63599	0.28457	0.70455	0.069974	0.88985	-0.1967	0.99997	0.052046	0.92883	-0.13126	0.85182	0.39999	0.13885	-0.075171	0.92113	-0.064675	0.91968	-0.17222	0.8506	0.52058	0.048943	-0.12101	0.90838	-0.073	0.96006	-0.48926	0.5091	-0.17536	0.91194	0.010335	0.99219
	contig04058	1.1761	0.02324	0.49907	0.65484	0.85901	0.099593	0.60624	0.84941	1.0729	0.029066	0.27474	0.78217	0.78489	0.058841	0.79977	0.17579	0.52631	0.41369	0.70916	0.39995	1.0387	0.011873	0.60152	0.49541	-0.54457	0.58148	0.038732	0.99936	-0.87184	0.24755	0.41966	0.61994
short chain dehydrogenase	contig04061	0.64939	0.22202	0.073098	0.96632	0.46617	0.40658	0.086271	0.99997	0.48315	0.39403	-0.21885	0.82573	1.103	0.0053975	-0.016446	0.98975	0.47645	0.45018	0.096753	0.96088	1.0552	0.0078325	0.0061135	0.9985	-0.4001	0.73096	0.071858	0.99936	-0.013854	0.99854	0.35035	0.68445
hypothetical protein BRAFLDRAFT_73458 [Branchiostoma floridae]	contig04064	-1.1878	0.037973	0.15405	0.92661	-1.321	0.02382	0.0052874	0.99997	-0.52952	0.42443	-0.30293	0.7819	-0.52241	0.27615	-0.64818	0.37263	-0.88055	0.14275	-0.55621	0.60996	-0.49451	0.3033	-0.53071	0.62754	-1.0174	0.19256	-0.59927	0.77377	-1.2542	0.087537	-0.28345	0.79852
multiple epidermal growth factor-like domains protein 11-like isoform 2	contig04065	-0.93682	0.043719	-0.49005	0.61399	-1.1824	0.014184	-0.81063	0.43104	-0.18319	0.79371	-0.9813	0.09269	-0.081732	0.86325	-0.96756	0.04816	-0.53196	0.32792	-1.0788	0.077983	-0.10629	0.81684	-0.9997	0.088833	-0.89285	0.14863	-0.78417	0.37911	-0.93648	0.1272	-0.65198	0.27016
nicotinic acetylcholine receptor non-alpha subunit	contig04071	1.2026	0.28163	0.90459	0.63816	2.9774	0.011431	1.0163	0.86977	1.45	0.15802	0.58286	0.72337	1.0461	0.21284	0.74301	0.57241	0.83668	0.54192	0.032222	0.99176	1.4518	0.073942	0.53656	0.81299	-0.069473	0.98908	0.18571	0.99936	-0.48728	0.92744	0.090158	0.97418
jmjc domain-containing protein 7	contig04072	0.12232	0.80546	0.41835	0.51064	0.17343	0.6635	0.073926	0.99997	0.39071	0.23543	0.057826	0.94135	0.67449	0.0068938	0.23853	0.60854	0.19131	0.68071	0.020069	0.98667	0.74827	0.0031634	0.08222	0.94468	0.085464	0.9431	-0.25518	0.91302	-0.15924	0.92078	0.0010091	0.99873
	contig04074	-0.00275	0.99737	0.32151	0.6508	0.097926	0.83619	0.088429	0.99997	0.25019	0.54582	0.0065765	0.9944	0.62405	0.017369	0.20176	0.71323	0.10674	0.85659	0.38491	0.50668	0.51965	0.048462	0.11239	0.91724	0.056542	0.97081	-0.026827	0.99936	0.1239	0.94808	0.37305	0.41717
	contig04075	0.2643	0.43263	0.22485	0.73082	0.31348	0.30895	0.10033	0.99997	0.45631	0.10192	0.10053	0.87196	0.86386	0.00027267	0.25753	0.51475	0.37164	0.24217	0.22495	0.71396	0.77656	0.0009968	0.16733	0.81395	0.06558	0.95627	0.11102	0.99936	0.16798	0.89131	0.2738	0.52014
endonuclease reverse transcriptase	contig04076	0.38322	0.42827	0.37242	0.67954	0.58209	0.16494	0.29622	0.99997	0.87165	0.023993	0.39755	0.53038	1.1085	0.00091321	0.70406	0.11782	0.67764	0.10941	0.38424	0.63547	1.1244	0.00095222	0.66509	0.25308	0.3657	0.68409	0.3606	0.87677	0.63191	0.31676	0.79023	0.10008
	contig04093	0.02017	0.97848	0.095623	0.92731	0.059532	0.91498	-0.39289	0.87616	0.062501	0.9197	-0.1027	0.90084	0.51196	0.073986	0.12447	0.86618	0.024363	0.97453	-0.11293	0.92707	0.63477	0.025019	-0.098903	0.9401	-0.17989	0.871	-0.1865	0.99117	-0.19062	0.91	0.0137	0.99029
	contig04097	0.55435	0.18716	0.42295	0.61271	0.43466	0.31524	0.11696	0.99997	0.11068	0.86658	0.033937	0.97522	0.38787	0.24253	0.13839	0.8667	-0.024386	0.97734	0.0416	0.97896	0.6827	0.030945	0.12485	0.92856	-0.16934	0.89879	0.26936	0.95604	-0.12699	0.95896	0.48617	0.36602
	contig04100	0.21153	0.65391	0.24704	0.76045	0.7057	0.043543	0.19315	0.99997	0.23774	0.59786	0.31764	0.56434	0.66214	0.016122	0.53596	0.17383	-0.0058735	0.9938	0.26159	0.73588	0.59676	0.030119	0.34529	0.58838	-0.079626	0.95641	0.30324	0.88084	0.098484	0.96558	0.58281	0.16694
serine hydroxymethyltransferase 2	contig04108	1.0477	0.073568	0.27061	0.859	0.48589	0.47127	-0.13713	0.99997	1.376	0.011563	-0.32068	0.7708	1.5146	0.0012896	-0.62584	0.40481	1.04	0.078189	0.21007	0.91152	1.186	0.010192	-0.17995	0.92916	0.6799	0.50274	-0.50011	0.88765	0.047832	0.99184	-0.50286	0.58282
serine hydroxymethyltransferase 1	contig04109	0.62061	0.43895	0.21508	0.90939	0.18103	0.85444	0.17573	0.99997	1.1974	0.065411	-0.27298	0.84681	1.6902	0.0019244	-0.60652	0.51981	1.0411	0.14286	-0.21962	0.92398	1.4492	0.0072052	-0.18534	0.94118	-0.26688	0.91005	-0.45955	0.95319	0.51741	0.81826	-0.049516	0.98188
pci domain-containing protein 2	contig04116	-0.00047898	0.99907	0.31368	0.57708	0.1578	0.64281	-0.015388	0.99997	0.21368	0.52155	0.26098	0.53305	0.40631	0.06009	0.53438	0.062744	-0.0029802	0.99622	0.25316	0.636	0.48254	0.024223	0.36438	0.39485	-0.015784	0.99148	0.12975	0.99657	0.04789	0.98028	0.35036	0.32354
	contig04121	0.39849	0.12233	-0.085465	0.90128	0.69059	0.0097289	-0.05243	0.99997	0.50554	0.033997	-0.13828	0.77268	0.95597	2.2067e-05	-0.11733	0.80339	0.50788	0.042615	-0.14714	0.81837	0.82709	0.0001831	0.031583	0.97755	-0.0032976	0.99683	-0.037902	0.99936	0.38234	0.33236	0.19833	0.63216
viral a-type inclusion protein	contig04125	-0.32347	0.84462	0.66804	0.77775	-0.02196	0.99093	0.91977	0.94522	0.67792	0.60002	2.8604	0.015785	0.61301	0.48676	-0.88677	0.52301	0.7673	0.57534	0.85249	0.6779	1.8355	0.019882	0.75588	0.72357	0.98818	0.61611	-0.18232	0.99936	0.027967	0.99854	0.3066	0.89047
u11 u12 small nuclear ribonucleoprotein 48 kda protein	contig04144	0.90139	0.12504	0.19322	0.90244	0.60149	0.33895	0.172	0.99997	0.57126	0.37746	0.58129	0.50377	0.83054	0.070729	0.11051	0.93492	0.32495	0.70972	-0.11812	0.95838	0.97692	0.031651	0.23308	0.89285	-0.067449	0.98147	0.14987	0.99936	0.47469	0.78238	0.073992	0.96398
	contig04151	0.44901	0.18299	0.085056	0.92791	0.67166	0.037977	-0.10267	0.99997	0.20774	0.62425	-0.12007	0.86271	0.7858	0.0023231	0.14701	0.80706	0.21986	0.63109	-0.10407	0.924	0.77501	0.0028504	0.0058727	0.9968	-0.091949	0.94015	0.1658	0.99196	0.16641	0.91497	0.54054	0.16482
	contig04152	0.27736	0.52693	0.22421	0.79095	0.26325	0.52774	0.12448	0.99997	0.18954	0.69791	0.28307	0.62554	0.82588	0.0032453	0.58457	0.13155	0.21098	0.68483	0.43192	0.46678	0.70942	0.010841	0.30479	0.66042	0.027965	0.98827	0.26304	0.93395	0.0064354	0.99945	0.39965	0.40765
	contig04156	0.42414	0.53176	-0.10913	0.94961	0.92665	0.087758	-0.20159	0.99997	0.47398	0.45928	-0.35214	0.71681	0.79716	0.065379	-0.072797	0.95317	0.24715	0.77958	-0.37404	0.76873	1.055	0.013837	-0.12541	0.95224	0.20662	0.91363	0.49321	0.86385	0.20633	0.94688	0.21475	0.84781
	contig04162	0.63327	0.043442	-0.071247	0.93985	0.71948	0.024381	-0.10845	0.99997	0.62161	0.035952	-0.031537	0.96914	1.045	9.3313e-05	-0.25044	0.58286	0.65024	0.035846	-0.22675	0.75134	1.1181	7.8749e-05	0.072871	0.95191	-0.033742	0.98264	0.065195	0.99936	-0.42414	0.43075	0.32659	0.46702
set and mynd domain containing 3	contig04165	-0.0025592	0.99783	0.36633	0.65312	0.2168	0.65081	0.10591	0.99997	0.40191	0.33532	-0.005407	0.99638	0.79468	0.0083212	0.32615	0.54526	0.24684	0.65443	0.62566	0.27419	0.77099	0.010586	0.26604	0.75632	0.012582	0.99466	-0.05675	0.99936	-0.40544	0.62483	0.26363	0.68934
	contig04168	1.7101	0.029346	0.40515	0.84081	0.89581	0.28716	0.21091	0.99997	2.0952	0.0047341	0.056108	0.97878	2.9038	2.919e-05	0.39242	0.78131	2.0651	0.0080157	0.03289	0.9902	2.4988	0.00023827	0.15688	0.96049	0.59588	0.75245	0.025966	0.99936	0.88563	0.58184	0.3241	0.84066
brucei -specific protein	contig04170	0.94487	0.070284	0.32623	0.79377	0.85798	0.098575	0.067945	0.99997	1.1311	0.020316	-0.1841	0.87034	1.8113	5.6066e-05	0.15028	0.89545	1.1667	0.022423	-0.058225	0.97784	1.6518	0.00023246	-0.02357	0.99207	0.51496	0.61611	-0.22401	0.99936	0.63042	0.51486	0.04833	0.9757
	contig04174	0.51217	0.36804	0.47006	0.66244	0.60304	0.24943	0.1911	0.99997	1.2087	0.0095671	0.12797	0.91246	1.6303	0.00011325	0.32219	0.68747	1.207	0.013783	0.16935	0.91838	1.2399	0.0021571	0.378	0.72293	1.3419	0.02789	-0.062402	0.99936	1.4368	0.0098187	0.095822	0.93945
	contig04177	0.20628	0.54742	0.22613	0.71168	0.43654	0.10742	-0.1641	0.99997	0.35854	0.19738	-0.17253	0.72532	0.64185	0.003055	-0.073346	0.90323	0.3166	0.31143	-0.015038	0.98777	0.63911	0.0033598	0.071873	0.94378	-0.0058488	0.9957	0.094882	0.99936	-0.091154	0.95527	0.21322	0.63076
	contig04178	0.20425	0.71117	0.37569	0.64793	0.65253	0.091405	0.30772	0.99416	0.41619	0.32152	0.27627	0.67918	0.71077	0.019708	0.50222	0.27665	0.39421	0.40596	0.45618	0.49497	0.61291	0.044915	0.46462	0.46707	0.20526	0.85722	0.36991	0.83182	0.12126	0.95992	0.56378	0.24315
dihydropyrimidinase	contig04181	0.67367	0.16088	0.21338	0.86056	0.65906	0.16243	-0.017619	0.99997	0.10048	0.89728	0.07072	0.95188	0.87611	0.016582	-0.49695	0.40581	0.66083	0.1846	-0.043576	0.98057	0.52772	0.16055	-0.51631	0.51275	0.11847	0.94722	-0.1101	0.99936	0.23917	0.91502	-0.060331	0.96329
	contig04196	0.1298	0.78846	0.35139	0.58885	0.29784	0.39711	0.20002	0.99997	0.28563	0.435	0.2407	0.64844	0.86137	0.00077095	0.46154	0.20007	0.29041	0.47088	0.43756	0.38191	0.81323	0.0015683	0.37798	0.46709	0.21868	0.78551	0.12476	0.99936	0.14864	0.92905	0.40922	0.31817
	contig04197	0.13286	0.73473	0.23106	0.69919	0.37971	0.16297	-0.010926	0.99997	0.29997	0.29437	0.033158	0.96158	0.74112	0.00068503	0.28357	0.41296	0.31606	0.30277	0.12	0.87553	0.74357	0.00080575	0.13239	0.8567	0.16733	0.82284	0.068434	0.99936	0.24511	0.71851	0.24108	0.55657
monoamine oxidase b	contig04198	0.4994	0.61583	0.66427	0.68985	1.2734	0.09092	0.44061	0.99997	0.65503	0.46179	0.49014	0.7156	1.242	0.037103	1.0992	0.20252	1.3199	0.084644	0.93989	0.45628	1.6962	0.0048266	0.51188	0.76556	0.74824	0.61357	0.03737	0.99936	0.85201	0.57497	0.097004	0.96382
component of oligomeric golgi complex 3	contig04201	1.4394	0.020228	0.1267	0.94884	1.4618	0.037057	-0.32302	0.99997	0.86541	0.17011	-0.16695	0.90745	1.4878	0.0028865	-0.036017	0.98018	1.1138	0.078189	-0.37938	0.80515	1.4266	0.0043482	-0.10053	0.97024	0.31922	0.86566	-0.010678	0.99988	0.4182	0.85376	0.20098	0.88302
foie gras	contig04208	0.25368	0.80363	0.081654	0.97437	-0.016464	0.98951	0.48106	0.99997	-0.0060662	0.99658	0.23931	0.88228	0.24962	0.68213	0.63131	0.53518	1.4367	0.024953	-0.07284	0.97945	-0.33084	0.61773	0.47473	0.77962	-0.2474	0.91333	0.79596	0.65285	-0.27159	0.94001	0.81517	0.34268
acyl-coenzyme a oxidase isoform cra_a	contig04211	0.78473	0.074691	0.23418	0.8323	0.59985	0.18021	0.33824	0.99651	0.82795	0.046561	0.078148	0.94306	1.0915	0.0019269	0.16789	0.84786	0.62359	0.18577	0.37147	0.68016	0.85652	0.01339	0.1633	0.9047	-0.17148	0.91005	0.054766	0.99936	0.030822	0.99259	0.34692	0.62742
phosphoglycerate mutase	contig04222	0.25875	0.39774	0.36522	0.49053	0.28133	0.32866	0.38543	0.65427	0.14856	0.68355	0.017865	0.98021	0.56228	0.0073521	0.24692	0.4951	0.041771	0.9354	0.30901	0.5022	0.6258	0.0032979	0.11535	0.87872	-0.2143	0.72739	-0.017458	0.99936	-0.098306	0.94846	0.21198	0.62241
apoptosis-inducing mitochondrion- 3	contig04229	0.59651	0.14321	-0.24833	0.79406	0.55184	0.17268	-0.032876	0.99997	0.68671	0.071231	-0.48531	0.38217	0.87493	0.0054362	-0.13217	0.87416	0.52146	0.23574	-0.31787	0.7076	0.8319	0.0082458	-0.25107	0.79173	0.13989	0.92318	0.11162	0.99936	0.24653	0.87576	-0.048198	0.96635
4-coumarate: ligase	contig04231	-0.49261	0.44603	0.61456	0.58633	0.38964	0.55174	0.26037	0.99997	0.59133	0.31783	-0.32159	0.75087	1.0729	0.012794	-0.031263	0.98018	0.58475	0.3709	0.079906	0.97182	0.96981	0.024355	0.0049664	0.99877	0.080142	0.9763	-0.54362	0.80807	-0.31085	0.89837	-0.057379	0.97229
phenylacetyl- ligase	contig04232	0.075913	0.84512	0.044586	0.95318	0.032806	0.93251	-0.16513	0.99997	0.29956	0.21719	-0.22704	0.52929	0.46509	0.011978	-0.039177	0.94376	0.073889	0.8596	-0.18345	0.71658	0.40022	0.030623	-0.056674	0.94959	-0.32994	0.36224	-0.23359	0.80807	-0.17231	0.82905	0.052106	0.92775
	contig04237	-1.2366	0.23989	0.010992	0.99674	-1.7784	0.09021	-0.56161	0.99779	-1.9173	0.041626	-0.048784	0.98271	-0.69152	0.41083	-0.8932	0.41618	-1.3897	0.18951	-0.2811	0.91924	-1.7062	0.039185	-0.39893	0.84562	0.57492	0.79323	-0.42917	0.98159	0.97965	0.48497	0.3466	0.84001
	contig04240	0.61776	0.12138	0.098462	0.93158	0.66999	0.087126	0.18403	0.99997	0.44567	0.28544	-0.38264	0.52426	0.92632	0.0030544	-0.17721	0.80866	0.33225	0.52261	0.17267	0.87812	1.0101	0.0016017	0.0088924	0.99638	-0.22269	0.8432	0.10911	0.99936	-0.023995	0.99396	0.20242	0.7877
regeneration-upregulated protein 5	contig04246	1.1858	0.030846	-0.043351	0.98179	0.34949	0.60547	-0.21805	0.99997	0.73767	0.19033	-0.48093	0.58789	1.0817	0.012935	-0.72	0.27328	0.64008	0.31563	-0.39408	0.75498	1.0799	0.013176	-0.37586	0.7648	-0.25506	0.883	-0.15201	0.99936	0.055501	0.98889	-0.20634	0.85991
regeneration-upregulated protein 5	contig04248	0.9528	0.0051156	0.41544	0.5494	0.85083	0.015012	0.14631	0.99997	0.8666	0.0064082	-0.17728	0.78452	1.2716	2.4296e-05	-0.068056	0.93179	1.0171	0.002694	-0.0012614	0.99917	1.2735	4.7746e-05	0.27327	0.69589	0.28773	0.70434	-0.092863	0.99936	0.62333	0.18433	0.21541	0.72368
#NAME?	contig04250	2.4768	0.083598	0.52818	0.89141	1.5092	0.32744	0.62322	0.99997	3.3685	0.011156	0.38249	0.90681	4.2511	0.00030069	-0.98282	0.654	3.0297	0.030057	-0.92242	0.78845	3.0964	0.0061283	-0.12351	0.98441	1.0513	0.76119	-0.42205	0.99936	1.8901	0.44028	-0.50309	0.86745
diphthine synthase	contig04252	0.85738	0.11948	-0.19737	0.89255	0.74717	0.17626	-0.13604	0.99997	0.42931	0.5174	0.27769	0.78846	0.5488	0.21908	-0.75087	0.23535	0.45838	0.52325	-0.81654	0.32775	1.2457	0.0040989	-0.43689	0.69472	-0.8197	0.30439	-0.18327	0.99936	-0.63467	0.54529	0.45171	0.60201
o-phosphoseryl-trna selenium transferase	contig04256	0.75555	0.1778	-0.016247	0.99304	1.0616	0.075742	-0.061831	0.99997	0.4873	0.43518	-0.1645	0.8924	1.1119	0.0088458	-0.09769	0.93884	0.82553	0.14196	-0.17465	0.92327	0.86485	0.041592	-0.2128	0.8937	-0.055184	0.98364	-0.032288	0.99936	-0.43145	0.79827	-0.30535	0.75906
	contig04260	-0.35437	0.47976	-0.31109	0.74357	-0.057844	0.93258	-0.35494	0.97349	-0.51307	0.23733	-0.57831	0.30234	0.04188	0.92486	-0.48761	0.34608	-0.32448	0.56706	-0.56163	0.40318	0.41367	0.22724	-0.29469	0.75015	-0.77814	0.15723	-0.23802	0.97855	-1.0194	0.041833	-0.16616	0.84559
	contig04261	0.51616	0.20153	0.2975	0.7345	0.55754	0.1507	0.49732	0.77132	0.67004	0.06793	0.44129	0.42541	1.025	0.00096981	0.64262	0.12683	0.64137	0.10221	0.56253	0.34975	0.92493	0.0027655	0.55108	0.33517	-0.10977	0.93973	0.41582	0.74886	-0.17697	0.9301	0.69941	0.12075
protein	contig04262	0.31955	0.27881	0.21164	0.73141	0.52891	0.050599	0.18711	0.99997	0.34488	0.21677	0.38449	0.28725	0.57072	0.0075217	0.51849	0.069791	0.10639	0.81395	0.42159	0.30097	0.55573	0.0093643	0.28447	0.54803	-0.078021	0.9395	0.39169	0.51725	0.069738	0.96809	0.68467	0.024212
	contig04263	-0.11972	0.89725	0.34977	0.7765	0.20931	0.76691	0.58146	0.8683	0.65928	0.22046	0.81948	0.22605	1.191	0.0039443	0.32379	0.70278	1.0131	0.04981	0.63115	0.47588	1.1873	0.004298	0.68458	0.40564	0.90911	0.20114	0.10709	0.99936	0.13795	0.96713	0.5932	0.40455
phospholipid-hydroperoxide glutathione peroxidase	contig04267	0.3861	0.41094	0.20777	0.84073	0.75912	0.06003	0.05414	0.99997	0.46389	0.28013	-0.051144	0.96066	0.799	0.01223	0.017487	0.98594	0.15778	0.81593	0.57107	0.37202	1.0244	0.0018539	0.11515	0.93708	-0.39163	0.62849	-0.034129	0.99936	-0.20109	0.92259	0.28014	0.68905
ovulatory protein-2 precursor	contig04270	1.5443	0.20671	0.31936	0.9246	1.3707	0.26263	0.1577	0.99997	2.3271	0.032756	0.019481	0.99501	3.2832	0.00053912	0.03119	0.99253	2.5019	0.027953	0.28347	0.94713	2.6732	0.0039978	0.33532	0.93571	1.6647	0.34442	-0.13206	0.99936	2.2433	0.14771	-0.24967	0.9297
	contig04271	2.5157	0.04302	0.46537	0.89135	1.7702	0.16293	0.27694	0.99997	3.2887	0.0050162	0.14951	0.96289	4.3862	4.9605e-05	0.38435	0.88572	3.388	0.0059476	0.59971	0.86228	3.6505	0.00049415	0.42287	0.91629	1.1312	0.67113	0.042498	0.99936	1.5634	0.49112	-0.17422	0.95989
	contig04276	0.072352	0.86084	0.069952	0.91969	0.22793	0.40721	-0.18609	0.99758	0.15203	0.64097	-0.30696	0.36553	0.30734	0.11904	-0.17741	0.62958	-0.2292	0.46142	-0.12125	0.85809	0.41266	0.03258	-0.11733	0.8636	-0.42265	0.21094	-0.10434	0.99936	-0.0857	0.95289	0.20998	0.58518
non-specific lipid transfer protein	contig04279	0.94461	0.0088515	0.4804	0.51233	0.76568	0.036577	0.48672	0.74526	0.77475	0.023576	-0.13131	0.8667	1.122	0.00022356	-0.11684	0.87979	0.65861	0.074082	0.14157	0.90068	1.1781	0.00020081	0.24775	0.76583	-0.31843	0.69264	0.10649	0.99936	-0.25564	0.84373	0.46047	0.33819
non-specific lipid-transfer protein	contig04280	0.86179	0.12154	-0.42543	0.73344	0.70556	0.21227	0.29355	0.99997	0.65553	0.25499	-0.71753	0.33927	0.60583	0.1749	-1.4866	0.0082818	0.22447	0.8043	-1.0917	0.14277	0.57438	0.19967	-0.83222	0.29213	-0.63743	0.50274	-0.52262	0.83227	-0.2337	0.93792	-0.49598	0.55315
	contig04282	0.70958	0.064412	0.55355	0.46101	0.24502	0.60148	0.095004	0.99997	0.60421	0.10698	0.39728	0.49011	1.1094	0.00042964	0.54411	0.21904	0.4955	0.24584	0.35755	0.6359	1.2156	0.00023588	0.33969	0.64888	-0.14238	0.91684	0.1038	0.99936	-0.55532	0.37087	0.017365	0.98817
	contig04284	0.30433	0.57736	0.17223	0.88003	0.61822	0.14938	-0.23897	0.99997	0.41686	0.38174	-0.31616	0.65962	1.0391	0.0022013	-0.2417	0.73675	0.47465	0.33893	-0.35887	0.68016	1.1479	0.0010109	-0.28038	0.77569	-0.20507	0.87665	-0.39127	0.85408	-0.15115	0.95235	-0.095308	0.92659
alpha 2	contig04289	0.95175	0.019513	0.054333	0.97064	0.76775	0.06128	-9.1806e-06	0.99997	0.63756	0.11427	-0.5555	0.32077	1.0846	0.0011112	-0.48985	0.33486	0.86479	0.032685	-0.58025	0.37277	0.79397	0.014408	-0.28579	0.75792	-0.2438	0.837	-0.067843	0.99936	0.48084	0.54765	0.40828	0.49778
alpha isoform b	contig04290	0.70134	0.082521	0.258	0.78909	0.79466	0.047769	0.0138	0.99997	0.9561	0.010753	-0.46853	0.41317	1.2228	0.00024535	-0.33598	0.55758	0.7673	0.055131	-0.33885	0.68153	1.268	0.00024167	-0.29503	0.73653	0.11943	0.93705	-0.42688	0.75771	0.49001	0.50734	-0.18426	0.81649
vacuolar protein sorting-associated protein 28 homolog	contig04292	0.77863	0.057429	0.63606	0.41871	0.7109	0.081538	0.4151	0.91154	0.98079	0.01037	0.54348	0.33172	1.336	0.0001154	0.24665	0.71546	0.9659	0.016356	0.28889	0.76019	1.4207	0.0001001	0.43525	0.54181	0.14562	0.92213	0.18617	0.99869	0.29575	0.83469	0.40763	0.49573
	contig04303	0.12049	0.81408	0.14387	0.86599	0.31669	0.37525	-0.09191	0.99997	0.21731	0.60445	-0.2343	0.6729	0.68268	0.007502	-0.17015	0.76408	0.23774	0.59734	-0.14944	0.8706	0.72635	0.0048711	-0.068044	0.95815	-0.31571	0.62343	-0.022441	0.99936	-0.11013	0.95498	0.21817	0.69939
	contig04312	1.1153	0.15518	0.072533	0.97848	1.7033	0.026957	0.25188	0.99997	0.90912	0.32477	0.76712	0.50233	0.64522	0.31303	0.12802	0.94307	0.14195	0.92219	0.36491	0.8622	0.36271	0.59802	0.083731	0.98113	-0.54994	0.77076	-0.92145	0.74813	-0.41926	0.90446	-0.4836	0.75798
retinol retinaldehyde reductase	contig04333	1.1075	0.066551	0.73062	0.55411	1.1053	0.065508	0.40558	0.99997	0.32097	0.70218	0.47279	0.63718	0.56941	0.25551	0.61414	0.43935	0.38951	0.65498	0.26844	0.87614	0.9477	0.046795	0.56633	0.61918	0.21087	0.92363	-0.38449	0.96398	0.3302	0.90491	-0.065156	0.97124
	contig04347	0.60692	0.46732	0.28188	0.88151	0.27363	0.77302	0.10571	0.99997	0.20717	0.85306	-0.12559	0.9426	0.44596	0.46653	0.055378	0.97183	-0.020162	0.98842	0.97327	0.38028	1.2836	0.019664	0.53669	0.71715	-1.0275	0.32471	-0.45932	0.95964	-0.75797	0.61007	0.47845	0.69313
testis potassium dependent sodium calcium-like	contig04357	1.9969	0.031375	-0.43213	0.90304	1.5518	0.13603	0.36514	0.99997	1.2619	0.24177	-0.80467	0.75237	1.0892	0.196	-0.10997	0.9702	0.17971	0.92686	-0.0036369	0.99917	1.9076	0.0096936	-0.26093	0.95945	-0.33888	0.9169	1.1659	0.8672	-0.23598	0.96809	3.2093	0.043278
beta-n-acetylhexosaminidase	contig04360	0.95764	0.085954	0.24506	0.8668	1.0578	0.055492	-0.07246	0.99997	1.6473	0.0020128	-0.27442	0.79759	1.9783	4.0586e-05	-0.10373	0.93612	1.5837	0.0038582	0.038488	0.9857	1.8045	0.00018493	-0.11829	0.95687	0.91177	0.24093	-0.37816	0.95082	0.065756	0.98777	-0.20876	0.85867
	contig04361	0.27376	0.79694	-0.10685	0.96381	1.0574	0.12355	-0.16667	0.99997	1.4641	0.022381	-0.31373	0.81629	1.8082	0.0010815	-0.38185	0.74492	1.3232	0.051793	-0.14321	0.95731	1.6239	0.0031219	-0.27058	0.89394	0.52489	0.7468	-0.37958	0.98246	-0.17824	0.96809	-0.24166	0.86776
chitobiase	contig04362	0.6066	0.080836	0.21745	0.79255	0.66762	0.053189	0.16267	0.99997	1.1745	0.00065785	0.02726	0.97677	1.4646	6.3513e-06	0.19253	0.74562	1.0663	0.001963	0.046908	0.97409	1.4696	1.1636e-05	0.1602	0.8674	0.41286	0.48613	-0.034703	0.99936	0.10484	0.96217	0.18908	0.77164
	contig04365	0.42144	0.65306	0.67381	0.64793	-0.03767	0.97511	0.028862	0.99997	0.20408	0.85513	0.33166	0.80676	0.73287	0.19762	1.0344	0.19022	0.47176	0.63258	1.1221	0.28259	1.1881	0.029892	0.24252	0.9131	0.49274	0.77781	0.34254	0.99573	-0.86927	0.49112	0.20145	0.89831
	contig04368	0.26622	0.57148	0.32549	0.68653	0.69004	0.059479	-0.023686	0.99997	0.19049	0.71112	0.23922	0.71454	0.6313	0.029133	0.61924	0.12261	0.17948	0.75862	0.31679	0.67515	0.72891	0.011873	0.35145	0.6077	-0.15839	0.89494	0.38597	0.76684	0.09359	0.96819	0.63213	0.15006
PREDICTED: hypothetical protein [Saccoglossus kowalevskii]	contig04371	0.57234	0.087739	0.53528	0.39216	0.54291	0.10193	0.10919	0.99997	0.53946	0.094577	0.036756	0.96604	0.74871	0.0045323	0.33556	0.44563	0.32272	0.43776	0.11908	0.91208	0.76612	0.0040042	0.17558	0.83991	-0.24084	0.77076	0.014285	0.99936	-0.046275	0.98544	0.40794	0.35647
	contig04375	1.9801	0.00034895	0.13871	0.92771	0.95457	0.067449	-0.15137	0.99997	0.73749	0.16322	0.14732	0.90282	1.6233	0.00020624	-0.27166	0.76902	0.49536	0.45633	-0.058981	0.97784	1.6312	0.00028232	-0.24814	0.86512	-0.90295	0.21355	0.029556	0.99936	-0.29129	0.9031	0.24386	0.8143
zinc finger protein 235	contig04385	0.35028	0.17948	0.15194	0.80186	0.30532	0.24364	-0.067433	0.99997	0.16151	0.62302	0.012758	0.98481	0.31388	0.119	-0.10723	0.82269	0.1863	0.59167	-0.032934	0.97478	0.51487	0.0093047	0.20785	0.68108	-0.24048	0.63351	-0.015573	0.99936	0.048422	0.97664	0.16669	0.70544
a chain structural consequences of accommodation of four non- cognate amino-acid residues in the s1 pocket of bovine trypsin and chymotrypsin	contig04406	-0.055465	0.9012	-0.031842	0.97111	0.14278	0.64451	-0.29223	0.83902	0.36907	0.13177	-0.46302	0.13684	0.86081	5.4919e-05	-0.20402	0.56504	0.4222	0.093925	-0.2832	0.5113	0.61574	0.0021067	-0.40737	0.23778	0.20798	0.70689	-0.42992	0.34524	0.50423	0.1174	-0.20918	0.59191
thymidine phosphorylase	contig04408	1.6601	0.17679	0.51971	0.84734	1.2983	0.30585	0.16681	0.99997	2.5196	0.010726	0.070469	0.98021	2.0154	0.01542	-0.17821	0.94285	1.1227	0.37342	-0.041111	0.99095	0.9194	0.29567	0.24119	0.95266	0.29869	0.94035	-0.18352	0.99936	0.64226	0.88122	-0.13217	0.9657
p8 nuclear protein	contig04411	1.1661	0.0024451	0.21225	0.82368	1.2227	0.0030764	-0.074457	0.99997	1.4933	0.00015475	0.053482	0.95576	1.9824	3.7164e-07	0.36303	0.48099	1.3608	0.00036938	0.22682	0.81105	2.0146	8.7675e-07	0.41248	0.53052	0.019727	0.99203	0.084079	0.99936	0.38667	0.65339	0.25092	0.71006
calponin acidic	contig04417	1.1847	0.033578	0.23139	0.87743	0.58434	0.3394	0.13268	0.99997	1.5457	0.0036448	-0.1882	0.87918	1.7046	0.00025382	-0.25283	0.80952	1.3465	0.014515	-0.054119	0.9802	1.5484	0.00085494	-0.011946	0.99675	0.37703	0.79895	-0.38125	0.95096	1.0176	0.19222	-0.024256	0.98838
suppressor of ty 6 homolog ( cerevisiae)	contig04424	-0.77112	0.20645	-0.39609	0.77079	-0.44608	0.51248	-0.096299	0.99997	-0.099118	0.92049	0.20791	0.8667	0.49345	0.31125	-0.24212	0.82784	1.3767	0.015435	-0.12151	0.95707	-0.075613	0.89796	-0.33602	0.81623	1.3699	0.055865	-1.1015	0.26099	0.82261	0.38626	-0.76623	0.30604
	contig04438	0.31407	0.58529	0.29648	0.7784	0.28251	0.60396	0.13748	0.99997	0.56668	0.21776	-0.26156	0.75087	0.73872	0.03553	-0.43216	0.47045	0.44436	0.41853	-0.02254	0.98867	0.82782	0.018205	0.24023	0.83343	0.0049732	0.99739	0.21633	0.99593	-0.1564	0.95289	0.16363	0.86123
(aldo keto reductase )	contig04450	0.18444	0.77699	0.48821	0.5822	0.28336	0.5849	0.07431	0.99997	-0.011044	0.98967	-0.063032	0.95304	0.35293	0.33068	0.086718	0.93113	-0.11813	0.87888	-0.10056	0.9503	0.69585	0.039671	0.082775	0.96162	-0.86914	0.11906	-0.2528	0.97729	-0.89888	0.10189	0.12851	0.89376
	contig04451	0.068392	0.91084	0.3038	0.67361	0.18861	0.64919	0.14198	0.99997	0.094505	0.85981	0.066228	0.93391	0.34047	0.20947	0.33691	0.43819	-0.023732	0.9731	0.14204	0.88392	0.6556	0.01194	0.21685	0.77842	-0.3158	0.6374	-0.091965	0.99936	-0.37317	0.57502	0.27601	0.59985
	contig04459	-0.015791	0.97892	0.2241	0.73942	0.33183	0.29245	-0.28967	0.92182	0.21865	0.55349	-0.069176	0.92042	0.5277	0.02316	-0.011091	0.98827	-0.083051	0.87475	-0.063045	0.95615	0.62218	0.0077671	-0.010326	0.9942	-0.10401	0.92318	-0.26322	0.86864	0.10719	0.95022	0.031862	0.97124
ankyrin unc44	contig04463	0.357	0.53477	0.19057	0.87658	0.076676	0.91433	0.4945	0.88438	0.41217	0.4419	0.3795	0.61341	0.31532	0.42889	0.023473	0.98297	0.73771	0.12022	0.38097	0.69143	1.1151	0.002622	0.41802	0.63529	-0.074591	0.97271	-0.22231	0.99593	-0.006362	0.99945	0.00069617	0.99934
	contig04470	0.11198	0.8632	0.23176	0.80313	0.36521	0.39342	-0.038171	0.99997	0.27576	0.56944	-0.043447	0.96511	0.75785	0.012193	0.28394	0.61887	0.59162	0.13988	0.29391	0.72458	1.0734	0.00074913	-0.065465	0.96674	0.19734	0.86389	-0.28791	0.93294	0.17423	0.93181	0.011772	0.99219
	contig04474	0.30368	0.54871	0.43687	0.59972	0.40835	0.35234	0.036112	0.99997	0.5428	0.18232	0.098053	0.91706	1.0819	0.00088134	0.33489	0.55835	0.61203	0.14446	0.19267	0.86228	1.0255	0.0017033	0.13523	0.91725	0.4238	0.57195	-0.19022	0.99762	0.37362	0.70959	0.063968	0.95198
	contig04475	0.75167	0.061364	0.48275	0.55761	0.87524	0.030369	0.21553	0.99997	0.8494	0.023958	0.16575	0.84019	1.363	7.368e-05	0.38287	0.48109	0.48342	0.29007	0.28277	0.76062	1.233	0.00031639	0.17801	0.87593	0.073802	0.96754	0.017391	0.99936	0.45837	0.56537	0.37728	0.53127
hypothetical protein BRAFLDRAFT_126052 [Branchiostoma floridae]	contig04498	1.8175	0.20404	0.63303	0.78007	1.899	0.16958	-0.059736	0.99997	2.7768	0.042119	-0.62196	0.7156	2.7035	0.011894	-1.015	0.41296	1.6602	0.27998	-0.56193	0.81489	2.9619	0.0097016	-0.22295	0.95139	-1.772	0.30735	-0.31491	0.99936	-0.35398	0.9556	-0.37789	0.84779
endonuclease-reverse transcriptase	contig04504	0.32508	0.26681	0.2528	0.66423	0.6027	0.026806	-0.020605	0.99997	0.47866	0.062966	-0.044159	0.94712	1.0522	1.4482e-05	0.30294	0.37371	0.39342	0.16898	0.039032	0.97246	0.88225	0.00017313	0.097961	0.90824	0.30121	0.53145	-0.0046427	0.99988	0.26726	0.6697	0.20088	0.65674
spastic paraplegia paraplegin (pure and complicated autosomal recessive)	contig04507	0.19992	0.66607	0.28345	0.71011	0.38731	0.2828	-0.13255	0.99997	0.79102	0.012325	-0.084595	0.91528	1.3363	1.3329e-05	0.38818	0.36237	0.84298	0.011141	0.19903	0.81501	1.2169	7.2699e-05	0.058482	0.96597	0.34941	0.58896	-0.14417	0.99936	0.20419	0.88442	0.15792	0.81371
paired box 9	contig04508	0.32958	0.51831	0.23562	0.81761	0.37606	0.41921	-0.26656	0.99997	0.48441	0.26643	0.088672	0.92779	0.83892	0.0098948	0.25374	0.70707	0.40782	0.42567	-0.31831	0.7215	0.73169	0.024255	0.17143	0.88763	-0.0055363	0.99683	-0.19327	0.99809	0.40425	0.67703	0.27603	0.70359
PREDICTED: hypothetical protein LOC100489817 [Xenopus (Silurana) tropicalis]	contig04510	0.48028	0.50611	0.0098043	0.99578	0.34255	0.64156	0.15961	0.99997	0.97741	0.085924	0.33458	0.76192	0.271	0.61626	-0.025339	0.98594	0.20727	0.83823	0.1616	0.93902	0.99536	0.031895	0.34557	0.81299	-0.008449	0.99672	-0.53563	0.86221	0.1352	0.97192	-0.086964	0.95684
syntaxin binding protein-	contig04513	-0.25103	0.64298	0.23741	0.81057	0.8284	0.040724	0.50281	0.79972	0.93716	0.012618	0.51307	0.35635	1.0398	0.0013605	0.50012	0.30648	0.67588	0.101	0.66547	0.26884	1.27	0.00024891	0.67666	0.22298	0.68695	0.2183	0.54022	0.58472	0.057407	0.98443	0.68243	0.15962
syntaxin-binding protein 1	contig04514	0.46239	0.1758	0.27049	0.71424	0.38432	0.26657	0.023197	0.99997	0.7069	0.021099	0.15816	0.80385	1.0299	0.00017236	0.4147	0.29353	0.40047	0.28055	0.38881	0.49264	0.99047	0.00036447	0.32332	0.58892	-0.15126	0.88313	0.15782	0.99593	-0.49238	0.33495	0.29986	0.54723
	contig04522	0.8744	0.27038	0.20481	0.92189	0.42205	0.64381	-0.37042	0.99997	1.6392	0.015912	-0.28111	0.85565	2.2921	0.00017215	-0.30177	0.83009	1.5051	0.035846	-0.3434	0.86693	1.8876	0.0015233	-0.45517	0.79541	0.98154	0.39702	-0.92434	0.62615	0.84089	0.55949	-0.54124	0.65763
	contig04523	0.8362	0.13074	0.23429	0.87031	0.58765	0.3151	-0.21354	0.99997	0.73681	0.18016	-0.11469	0.92913	1.3897	0.0014609	0.12617	0.91759	0.86045	0.12641	-0.70057	0.43077	1.3751	0.0018368	-0.14	0.94515	0.1278	0.95433	-0.18388	0.99936	0.037234	0.99279	0.21684	0.84559
actin-like 6a	contig04525	-0.76638	0.59623	0.284	0.92946	-1.1972	0.31704	0.28263	0.99997	-1.2997	0.2681	0.35912	0.88459	-2.0948	0.016498	0.75481	0.66189	-0.88778	0.55429	0.63392	0.82238	-2.1423	0.014307	0.82353	0.73212	-0.64307	0.84097	0.40429	0.99936	-0.65133	0.89131	-0.40122	0.86424
lipoma hmgic fusion partner-like 4	contig04534	-0.36147	0.60837	0.049371	0.97903	-1.056	0.049784	-0.43928	0.98806	0.21946	0.78437	-0.91593	0.18342	0.53676	0.22607	-0.59309	0.38755	0.49622	0.47059	-0.37297	0.76552	0.35437	0.44755	-0.66046	0.44931	-0.4163	0.74311	-0.77094	0.52742	-0.81564	0.326	-0.76056	0.26158
	contig04542	0.82254	0.12109	0.21765	0.87611	0.87917	0.091571	0.25986	0.99997	0.58885	0.29024	0.027991	0.9841	0.96187	0.0193	0.28617	0.75166	0.79951	0.14275	0.2961	0.82523	1.0533	0.010659	0.39119	0.7281	-0.020381	0.99466	0.40334	0.92695	-0.081361	0.98222	0.27597	0.78153
	contig04548	0.54013	0.26126	-0.22173	0.84469	0.83703	0.058771	-0.23266	0.99997	0.21302	0.73731	-0.21994	0.79759	0.67067	0.057071	0.14461	0.87711	0.098195	0.90764	-0.073038	0.96601	1.0538	0.003105	0.044082	0.98287	-0.0015614	0.99904	-0.0026462	0.99997	-0.094372	0.97433	0.45876	0.46894
	contig04555	-0.46537	0.59699	0.084247	0.97205	-0.46255	0.56908	-0.15773	0.99997	-0.52948	0.52228	-0.47194	0.68692	-1.1489	0.030835	0.10812	0.94552	-0.35101	0.73755	-0.4066	0.80629	-1.2087	0.022875	-0.572	0.67151	-0.05905	0.98641	-0.021702	0.99936	-0.35616	0.91115	-0.48728	0.67044
phospholipid scramblase 1	contig04564	0.71601	0.24511	-0.20028	0.89676	0.57578	0.36133	-0.85315	0.62507	0.61623	0.32212	-0.8138	0.28847	1.0276	0.022962	-0.84781	0.1943	0.68059	0.29958	-0.78202	0.39645	1.2045	0.0080167	-0.61045	0.54104	-0.42409	0.76107	-0.66198	0.70023	-0.1274	0.97192	-0.80205	0.26859
	contig04567	0.48617	0.173	0.54243	0.40714	0.38851	0.28804	0.065805	0.99997	0.61173	0.062051	0.23632	0.69334	0.88705	0.0013272	0.55788	0.14142	0.39992	0.31096	0.27082	0.71171	1.0094	0.0004688	0.24302	0.75033	-0.088663	0.94646	0.089662	0.99936	-0.002995	0.99945	0.21926	0.72139
PREDICTED: hypothetical protein [Ciona intestinalis]	contig04597	1.5038	0.0085989	0.68092	0.56821	1.311	0.025358	0.62285	0.88438	1.5356	0.0047749	0.56557	0.52424	2.0373	4.9219e-05	0.78135	0.25252	1.1513	0.044949	0.48551	0.68556	1.8179	0.00026074	0.51392	0.64844	0.17071	0.93781	0.46256	0.91673	0.16563	0.96554	0.7445	0.32627
	contig04598	0.80905	0.078497	0.32624	0.7574	0.6169	0.18786	0.12683	0.99997	0.55853	0.24393	-0.0041046	0.99747	1.0022	0.0057005	0.088498	0.93432	0.38028	0.53386	0.2104	0.87196	0.88528	0.014226	-0.15764	0.91481	-0.10723	0.9545	0.044464	0.99936	0.10312	0.97192	0.31377	0.693
methyltransferase-like protein 5	contig04605	0.37152	0.52731	0.3234	0.77023	0.15027	0.82149	0.2779	0.99997	0.33349	0.57922	0.0374	0.97672	0.73531	0.049621	0.080404	0.94249	0.7135	0.14959	0.37627	0.70871	0.75234	0.043566	0.34928	0.73431	-0.11885	0.94898	0.18136	0.99936	0.090615	0.97714	0.27049	0.75622
b-cell receptor-associated protein 31	contig04607	1.0397	0.037368	0.29495	0.81139	0.87503	0.079947	0.17137	0.99997	0.93535	0.049682	-0.1799	0.8669	1.3003	0.0013064	-0.1334	0.90527	0.90008	0.075935	-0.46466	0.6396	1.2794	0.0017495	0.18935	0.90251	-0.18167	0.91917	0.24045	0.99593	-0.10081	0.97659	0.55132	0.42777
	contig04608	-0.019414	0.98878	0.015226	0.99487	-0.16557	0.8617	-0.35917	0.99997	0.40279	0.64325	-0.54577	0.60894	1.042	0.04388	-0.7341	0.37404	0.1966	0.86631	-0.58845	0.65468	0.33471	0.56757	-0.57176	0.65414	0.77567	0.49079	-0.8209	0.62973	1.1298	0.22361	-0.61863	0.52607
isoform cra_a	contig04612	0.3489	0.24917	0.097921	0.89735	0.56619	0.04452	-0.077839	0.99997	0.3229	0.27933	-0.38587	0.31228	0.48599	0.028526	-0.37085	0.26632	0.20172	0.60927	0.09029	0.92452	0.61643	0.005854	0.014595	0.99123	-0.35229	0.45002	0.051063	0.99936	-0.2688	0.69337	0.12185	0.83043
cytochrome family subfamily polypeptide 1	contig04628	0.68277	0.24598	0.60239	0.59479	0.96437	0.076384	0.492	0.955	1.42	0.0056002	0.45474	0.6122	1.7114	0.0001824	0.31209	0.73675	1.532	0.0046783	0.36317	0.78246	1.4933	0.00095012	0.48079	0.65245	0.65403	0.48613	0.21106	0.99936	0.29449	0.908	0.17973	0.87954
zinc finger protein zic 1	contig04634	-1.2672	0.15409	-0.54895	0.7909	0.097783	0.94519	-0.22725	0.99997	-0.26489	0.84633	-0.21681	0.91403	-0.43784	0.62095	0.095012	0.96119	-0.108	0.9504	-0.11598	0.97425	-1.433	0.034898	-0.54142	0.7927	0.58104	0.7979	-0.11238	0.99936	0.24117	0.96558	-0.1467	0.9478
staphylococcal nuclease and tudor domain containing 1	contig04639	0.15128	0.81074	0.60693	0.43549	0.37459	0.40263	0.20409	0.99997	0.54144	0.18209	-0.18777	0.81125	0.88674	0.0051251	-0.062314	0.94741	0.62569	0.13279	0.042859	0.97872	0.88195	0.0055955	0.17145	0.88199	0.46206	0.50851	-0.12386	0.99936	0.56252	0.39533	-0.039113	0.97433
staphylococcal nuclease domain containing 1	contig04640	0.18837	0.80545	0.27138	0.82336	0.39752	0.48144	0.088816	0.99997	0.31981	0.61448	-0.35737	0.6665	0.79642	0.038242	0.53717	0.38647	0.35729	0.59764	-0.023385	0.98896	0.81745	0.032862	-0.19758	0.89224	0.20777	0.89739	-0.3257	0.95604	0.21806	0.93351	-0.021148	0.98838
	contig04645	0.082952	0.87946	0.57709	0.2813	0.30122	0.38971	0.15401	0.99997	0.26339	0.48348	0.15433	0.80017	0.9627	0.00023369	0.35372	0.37402	0.38684	0.2767	0.068016	0.95547	0.69573	0.0054746	0.19045	0.80543	0.21201	0.79802	-0.05322	0.99936	0.075267	0.97071	0.2813	0.56057
charged multivesicular body protein 5	contig04653	0.68788	0.025033	0.1633	0.8357	0.73374	0.020407	0.092595	0.99997	0.42924	0.16961	-0.10323	0.87994	0.55938	0.021826	-0.21318	0.65603	0.37003	0.29498	-0.20389	0.78378	0.73067	0.0032644	0.18512	0.80993	-0.24872	0.72935	-0.080003	0.99936	0.014944	0.99604	-0.09383	0.8925
	contig04657	0.1891	0.66998	0.38613	0.5628	0.61618	0.055951	0.073883	0.99997	0.62631	0.04007	0.053738	0.94672	0.95845	0.00033123	0.038395	0.95863	0.6254	0.051878	0.1185	0.90874	0.91466	0.00068026	0.12159	0.9028	0.19106	0.83767	-0.22749	0.94699	0.049734	0.98254	0.13193	0.84187
	contig04658	0.33159	0.25473	0.033493	0.97226	0.51282	0.056291	-0.067494	0.99997	0.32976	0.24198	-0.27984	0.48877	0.55599	0.0089362	0.029588	0.96125	0.15088	0.71228	-0.14789	0.83505	0.68935	0.0016977	-0.11742	0.87851	-0.053369	0.96473	-0.17624	0.95964	-0.044137	0.98085	0.15467	0.75553
	contig04659	0.04464	0.93113	0.39238	0.46101	0.42848	0.1153	0.067629	0.99997	0.44147	0.094191	0.286	0.48123	0.75768	0.00063191	0.33367	0.31478	0.34247	0.26157	0.31918	0.49666	0.66631	0.0024206	0.26995	0.58665	0.10584	0.9102	-0.068514	0.99936	-0.086018	0.95894	0.22406	0.60701
nicotinic acetylcholine receptor beta 1 subunit	contig04665	0.42668	0.51272	0.60539	0.58016	0.86568	0.10081	0.1907	0.99997	1.0399	0.036683	0.26105	0.79866	1.6205	0.00023031	0.15362	0.89451	1.1041	0.033965	0.032919	0.9868	1.6636	0.00025282	0.31912	0.80663	0.73503	0.37175	-0.12038	0.99936	0.60722	0.56192	0.16881	0.8841
	contig04667	2.1406	0.16782	0.66705	0.79174	1.8968	0.22119	0.10449	0.99997	2.5667	0.07368	0.11246	0.96765	3.1126	0.0084764	-0.047247	0.98563	1.8589	0.26897	0.0030976	0.99917	2.8361	0.016248	0.049272	0.99196	-0.14509	0.98063	-0.093639	0.99936	1.3588	0.56072	0.53304	0.79295
	contig04669	0.23073	0.61481	0.25152	0.75105	0.11791	0.80897	0.49802	0.667	0.4532	0.20476	0.76731	0.075496	0.56476	0.039939	0.4501	0.27827	0.36532	0.38298	0.54465	0.29875	0.5583	0.041796	0.76226	0.079023	-0.24527	0.78088	0.269	0.92601	-0.19121	0.90491	0.40049	0.39822
gen homolog endonuclease	contig04672	0.35018	0.18052	-0.14671	0.81184	0.78013	0.0038565	-0.1272	0.99997	0.71553	0.0028051	-0.48615	0.12295	1.2364	6.808e-07	-0.41367	0.13426	0.66311	0.007441	-0.29414	0.49673	0.95352	3.9773e-05	-0.31569	0.43401	0.46929	0.15646	-0.42421	0.37394	0.39949	0.28271	-0.29612	0.38265
	contig04685	0.62787	0.029614	0.093005	0.90789	0.67085	0.023231	-0.10839	0.99997	0.44271	0.12149	-0.19441	0.70563	0.76759	0.0010787	0.030318	0.96351	0.24921	0.51447	-0.095123	0.92157	0.77835	0.001108	-0.014878	0.99132	-0.26601	0.6652	0.033002	0.99936	0.036751	0.98666	0.50255	0.14745
granulin	contig04688	1.4738	0.010209	0.35871	0.79701	0.8462	0.15045	0.12612	0.99997	1.7474	0.0018596	-0.051408	0.97422	1.8198	0.00018186	-0.28619	0.78566	1.3739	0.016181	0.012609	0.99548	1.7443	0.00039515	0.14118	0.94915	0.53827	0.65996	-0.21209	0.99936	0.55773	0.69197	0.081636	0.95974
	contig04702	0.33647	0.22543	0.169	0.78711	0.36024	0.17562	0.20092	0.99651	0.3815	0.14245	-0.014776	0.98323	0.68163	0.0012147	0.10916	0.8279	0.21064	0.54976	0.1599	0.8031	0.62015	0.0031037	0.11207	0.88162	0.0095157	0.99466	0.33036	0.62792	-0.12443	0.92768	0.40733	0.20628
orf2-encoded protein	contig04703	0.38532	0.21574	0.30872	0.61346	0.47564	0.10494	0.022591	0.99997	0.57606	0.037663	0.052755	0.94264	1.0599	3.6959e-05	0.25703	0.53132	0.46594	0.12684	0.10783	0.90873	0.94144	0.00021333	0.19722	0.77153	0.30787	0.57806	0.07606	0.99936	0.34139	0.55316	0.15062	0.78927
	contig04704	0.53799	0.021216	0.15684	0.77874	0.48838	0.038835	0.12621	0.99997	0.54258	0.013464	0.0068746	0.99169	0.76571	0.00011854	0.18605	0.58598	0.34407	0.16907	0.13935	0.8137	0.78082	0.00015514	0.19463	0.6841	-0.17804	0.75201	0.33063	0.54431	-0.13456	0.8976	0.41251	0.14076
	contig04705	0.19908	0.55314	0.29963	0.5828	0.30607	0.2761	0.065628	0.99997	0.026185	0.95636	0.22349	0.60508	0.21029	0.35005	0.55242	0.046215	-0.071105	0.88256	0.29872	0.52103	0.40548	0.053054	0.43053	0.24725	0.021696	0.98783	0.3242	0.65288	-0.12305	0.92926	0.57168	0.058918
	contig04706	0.31132	0.79618	-0.8417	0.6937	1.2473	0.12711	-0.048478	0.99997	0.69142	0.30568	1.1784	0.39075	1.38	0.033345	-0.90879	0.36405	0.39428	0.65886	-0.15543	0.96613	0.90825	0.073552	-0.45934	0.82819	0.21447	0.94568	-0.60236	0.82697	-0.23623	0.95289	0.42071	0.77598
programmed cell death	contig04712	0.74117	0.095842	-0.14698	0.90273	0.61931	0.16588	-0.014865	0.99997	0.55027	0.22854	-0.51489	0.41103	0.90015	0.0094751	-0.17776	0.83532	0.27483	0.66737	-0.40892	0.63711	0.81031	0.019325	-0.25277	0.81935	-0.33379	0.75028	0.014597	0.99936	-0.054632	0.98751	0.23529	0.77914
isoform d	contig04715	1.0605	0.059932	0.07646	0.96977	1.2728	0.02541	-0.26936	0.99997	0.6915	0.24016	0.025956	0.98617	1.1205	0.011513	-0.48528	0.54009	0.2881	0.74345	-0.36373	0.78918	1.1121	0.012308	-0.10852	0.96162	-0.51849	0.66201	0.14059	0.99936	-0.54876	0.68315	0.26771	0.80819
	contig04717	-0.44668	0.53621	-0.20054	0.89735	-2.6473	5.3816e-05	-1.8732	0.010988	-0.36582	0.63099	0.0060976	0.99711	0.0062799	0.99302	-0.21351	0.85327	-0.48765	0.52298	-0.50217	0.67071	-0.074386	0.89915	0.037372	0.9897	-0.57747	0.60643	0.01818	0.99936	-1.3275	0.065193	-0.21273	0.86084
	contig04719	-0.026378	0.94872	0.10051	0.8537	0.012426	0.97295	-0.067604	0.99997	0.011565	0.9774	-0.14927	0.68021	0.24467	0.14954	-0.0097526	0.98468	-0.059599	0.87351	-0.059158	0.93832	0.3325	0.044542	0.03195	0.97191	-0.23545	0.52906	-0.10039	0.99593	-0.034423	0.98085	0.14538	0.68795
cystatin e m	contig04721	0.22715	0.69548	0.14782	0.89411	0.16607	0.76722	-0.37163	0.955	0.67321	0.093318	-0.57757	0.30013	1.0115	0.0022389	-0.96747	0.023703	0.53625	0.24282	-0.15821	0.90286	0.61579	0.060207	-0.41513	0.57854	0.137	0.92742	-0.97635	0.12002	0.14698	0.95285	-0.87551	0.062898
eukaryotic translation elongation factor 1 delta (guanine nucleotide exchange protein)	contig04726	0.3499	0.38155	0.074363	0.94461	0.34727	0.36558	-0.15881	0.99997	0.36598	0.33732	-0.69435	0.11199	0.58581	0.033238	-0.71269	0.051263	0.28077	0.55072	-0.29041	0.68843	0.57065	0.037899	-0.15183	0.87857	-0.32737	0.64933	0.013374	0.99936	-0.23279	0.85482	0.0026963	0.99795
protein	contig04733	0.3586	0.30948	0.16867	0.83468	-0.038146	0.94232	-0.22138	0.99997	0.39778	0.23032	0.041677	0.95969	0.53576	0.033084	0.1294	0.83455	-0.050322	0.93522	-0.027953	0.98235	0.42613	0.093745	-0.033367	0.98224	-0.23072	0.77076	-0.16275	0.99254	-0.1625	0.91777	0.23928	0.65335
cell wall protein flo11p	contig04735	0.059274	0.92324	0.33254	0.62763	0.32282	0.37437	0.016424	0.99997	0.2112	0.6252	0.12505	0.8587	0.71746	0.005829	0.21957	0.67104	0.31304	0.44982	0.077731	0.9498	0.71853	0.005962	0.18492	0.82553	0.26412	0.72942	0.02976	0.99936	0.20237	0.87869	0.2311	0.68247
	contig04736	0.17603	0.62616	0.18487	0.77273	0.39013	0.15612	-0.09801	0.99997	0.25426	0.41403	-0.097878	0.8662	0.51674	0.015646	0.013712	0.98325	0.12838	0.76869	-0.21454	0.7113	0.58722	0.0064145	-0.025294	0.98337	-0.10047	0.91684	-0.025531	0.99936	0.19154	0.84077	0.28248	0.46404
	contig04744	0.50264	0.35661	-0.011514	0.99449	0.46616	0.38278	0.19095	0.99997	0.62148	0.21007	-0.21371	0.82261	0.86492	0.022544	-0.4649	0.47315	0.58744	0.28127	-0.65259	0.40009	0.80971	0.032719	-0.32769	0.76448	0.41914	0.69286	-0.17751	0.99936	0.45896	0.69337	0.10413	0.9291
immunoglobulin kappa light chain variable region	contig04745	0.96864	0.043719	0.11181	0.93815	0.7847	0.10322	0.19586	0.99997	1.0839	0.016142	0.11405	0.91963	1.4018	0.00041021	0.1599	0.87455	1.1885	0.012078	0.40604	0.68395	1.2726	0.001289	0.17808	0.90535	0.38637	0.73051	0.22306	0.99831	0.58167	0.51827	0.42117	0.57507
neuronal cell adhesion	contig04751	0.78899	0.21506	0.37353	0.79474	0.8778	0.14904	0.24304	0.99997	1.0469	0.069035	0.46485	0.64339	1.4678	0.0022871	0.11219	0.93646	0.95788	0.12396	0.15252	0.94386	1.2727	0.0076189	0.38129	0.79087	0.44717	0.75896	-0.28497	0.99767	0.72954	0.51283	0.085019	0.95952
sap30 binding protein	contig04763	0.81676	0.22396	0.7408	0.56926	0.5632	0.43261	0.29735	0.99997	1.1088	0.066557	0.71223	0.43963	1.301	0.0090994	0.92671	0.19973	0.92325	0.16907	0.16173	0.94319	1.4321	0.0045684	0.40646	0.78597	-0.0096056	0.99667	-0.011096	0.99988	-0.34909	0.90446	0.37443	0.74569
	contig04764	0.36743	0.17905	0.30773	0.56861	0.4733	0.069087	0.2151	0.9877	0.3192	0.24488	0.19763	0.65439	0.66642	0.0015655	0.30391	0.35453	0.11001	0.79841	0.18407	0.76183	0.63	0.0028362	0.30295	0.4935	-0.16751	0.8158	0.18011	0.95049	-0.11698	0.93467	0.53233	0.076945
protein mida mitochondrial precursor	contig04766	0.18901	0.53519	0.13165	0.82958	0.26084	0.32174	-0.11699	0.99997	0.41	0.080855	0.025806	0.9679	0.61297	0.0017118	0.13472	0.74795	0.19702	0.54799	0.029728	0.97645	0.54782	0.0048266	0.16911	0.75792	0.034753	0.97745	-0.032348	0.99936	0.25554	0.63177	0.31616	0.31845
translocon-associated protein subunit gamma	contig04774	0.48692	0.17179	0.1829	0.83207	0.62812	0.065508	0.096221	0.99997	0.69771	0.030431	-0.46322	0.32059	1.1031	0.00013383	-0.26362	0.59925	0.77731	0.020615	0.15282	0.87586	0.99584	0.00052506	0.067138	0.96116	0.098768	0.9395	-0.0094702	0.99936	0.048307	0.98496	0.20784	0.7379
mechanosensory abnormality family member (mec-2)	contig04784	0.82935	0.31529	-0.00010627	0.99998	0.071091	0.9536	-0.2298	0.99997	1.5316	0.028732	-0.16411	0.91629	1.1369	0.054505	-0.2516	0.84856	0.78798	0.37725	-0.17872	0.94038	1.0356	0.080372	-0.12875	0.9614	-0.71302	0.56339	-0.17137	0.99936	-0.30988	0.92926	-0.082369	0.96597
chromosome 14 open reading frame 50	contig04798	0.1864	0.7791	-0.063855	0.96632	0.22122	0.69463	-0.27287	0.99997	0.87571	0.032897	-0.44243	0.50117	1.2764	0.00038278	-0.3923	0.51541	0.80123	0.067905	-0.32962	0.73198	1.0385	0.0030883	-0.38953	0.64462	0.056113	0.97971	-0.2637	0.97299	-0.2378	0.90675	-0.13924	0.88442
	contig04806	0.10415	0.8	0.39021	0.44967	0.31391	0.25716	0.33541	0.77932	0.035125	0.93931	0.34266	0.34298	0.21033	0.34617	0.66738	0.014139	-0.16954	0.6564	0.30339	0.50896	0.20352	0.36226	0.46129	0.2	-0.18519	0.78101	0.2517	0.83182	-0.26898	0.64946	0.48205	0.11827
delta 1-pyrroline-5-carboxylate	contig04810	0.3587	0.5324	0.83563	0.29307	0.45528	0.36923	0.92779	0.28229	0.2495	0.69493	0.79371	0.17408	0.69928	0.055623	0.67839	0.19588	0.68648	0.1565	0.29205	0.79404	0.95053	0.0090155	0.60959	0.40245	0.78114	0.22063	0.51374	0.73006	0.63484	0.40866	0.51056	0.42081
cytidine deaminase	contig04813	0.99035	0.0082331	0.2118	0.82325	0.75173	0.047503	-0.048765	0.99997	0.75053	0.035391	-0.19668	0.7856	0.96709	0.0015202	-0.2907	0.60115	0.63334	0.10245	-0.14835	0.89926	1.1468	0.00036343	0.035572	0.98336	-0.21017	0.84977	-0.12552	0.99936	-0.36905	0.68342	0.048474	0.96424
tropomodulin isoform cra_a	contig04816	1.1192	0.33043	0.76221	0.61346	0.40728	0.78417	0.52621	0.99779	1.1387	0.30101	0.53281	0.66696	1.9773	0.01501	0.72766	0.44947	1.3926	0.21503	0.66811	0.64255	1.973	0.021957	0.96012	0.40433	0.039138	0.99263	-0.0025063	0.99997	0.17518	0.97354	0.030934	0.98856
tropomodulin 1	contig04817	1.2557	0.020228	0.67899	0.53894	0.59543	0.31063	0.67548	0.80515	1.3102	0.010165	0.11888	0.9274	1.8674	6.767e-05	0.40049	0.62358	1.276	0.017226	0.47199	0.67466	1.3723	0.0019566	0.59781	0.52334	0.031771	0.99148	-0.011454	0.99988	0.37724	0.84634	0.026845	0.98736
	contig04822	0.4576	0.2866	-0.059834	0.96547	0.52069	0.19486	-0.3877	0.91956	0.21399	0.69238	-0.50038	0.35397	0.82343	0.007781	-0.20399	0.76755	0.42709	0.358	-0.44853	0.51206	0.99994	0.0017278	-0.13819	0.91133	-0.2581	0.80652	0.058166	0.99936	-0.065837	0.98056	0.23941	0.73544
	contig04825	0.59965	0.15206	0.17272	0.87309	1.0159	0.015012	0.27634	0.99997	0.67713	0.084461	0.22357	0.77037	1.1298	0.00064715	0.51765	0.28874	0.6984	0.091874	0.19635	0.86087	1.2645	0.00027794	0.35209	0.65976	0.012894	0.99466	0.3434	0.89377	-0.050609	0.98751	0.59773	0.23748
	contig04826	-0.069617	0.89375	0.21852	0.74367	0.58635	0.045928	0.065246	0.99997	0.16075	0.69148	0.36567	0.36925	0.58629	0.011258	0.7453	0.014028	0.081033	0.87835	0.44303	0.32555	0.42907	0.065367	0.41652	0.34427	0.17574	0.83571	0.27424	0.84763	0.36495	0.49566	0.62841	0.060374
solute carrier family 6 member 7	contig04828	1.6309	0.017772	0.87687	0.53005	1.4059	0.043543	0.44608	0.99997	1.6275	0.012133	0.83451	0.39333	2.195	0.00016911	0.51857	0.61452	2.2111	0.0015149	0.70805	0.58534	2.0221	0.00053059	0.60586	0.65603	1.9258	0.047299	0.63477	0.85927	1.9167	0.040325	0.94192	0.29097
	contig04835	0.28406	0.79229	0.52178	0.74357	-0.44436	0.60251	0.4077	0.99997	0.83181	0.25794	0.1736	0.91529	1.1734	0.033007	-0.081261	0.95894	0.83398	0.29496	0.52935	0.72998	1.1773	0.032208	-0.020002	0.99548	0.039926	0.99151	0.10454	0.99936	-0.13778	0.97659	-0.42382	0.73706
	contig04839	0.23898	0.4186	0.12075	0.85474	0.41882	0.098078	-0.17418	0.99997	0.33523	0.1964	-0.036863	0.95343	0.49503	0.013266	0.012292	0.98417	0.17536	0.62446	-0.068782	0.93969	0.54098	0.0071826	0.019728	0.98598	-0.10748	0.89825	-0.12301	0.99593	0.091703	0.95067	0.2702	0.44789
regeneration-upregulated protein 3	contig04840	-1.8182	0.049266	-1.259	0.49485	-3.3377	0.0009685	-1.1315	0.81611	-3.529	0.00021781	-1.9929	0.083503	-2.6117	0.00057018	-2.8368	0.0028186	-3.5776	0.00013209	-2.0395	0.099897	-2.3761	0.0016831	-2.4014	0.031104	-2.041	0.079058	-2.0625	0.14494	-3.3457	0.00078734	-1.7102	0.11623
oxysterol-binding protein	contig04846	0.52997	0.3329	0.51127	0.61557	1.1023	0.025657	0.71527	0.64495	0.44258	0.43543	0.92469	0.1323	0.88314	0.021794	1.457	0.003461	0.33607	0.62705	0.90274	0.18463	1.0256	0.0080653	1.1138	0.063353	0.77657	0.26537	0.95974	0.23223	-0.20287	0.94115	1.0044	0.07263
	contig04848	0.34767	0.31836	0.42744	0.49173	0.45278	0.1536	0.12413	0.99997	0.49494	0.10574	0.23614	0.65439	1.1378	3.3727e-05	0.25701	0.56824	0.52896	0.098276	0.19759	0.79629	0.96854	0.00029656	0.29481	0.61769	0.18585	0.83673	-0.011452	0.99936	0.23646	0.82118	0.17575	0.76267
microsomal glutathione s-transferase 3	contig04850	0.46201	0.24916	-0.2079	0.82336	0.36353	0.37772	-0.28204	0.99758	0.2878	0.53065	-0.61458	0.20134	0.5388	0.06923	-0.80149	0.039214	0.064048	0.92871	-0.70498	0.17137	0.59451	0.043154	-0.34822	0.62207	-0.78787	0.09483	-0.13018	0.99936	-0.48583	0.45725	0.10329	0.90323
	contig04854	0.32883	0.39829	0.18574	0.82632	0.51182	0.13205	-0.078158	0.99997	0.57432	0.077144	-0.00080225	0.99927	1.0969	0.00011955	0.14034	0.82909	0.45575	0.21741	0.019659	0.98736	1.1007	0.00018438	0.0042181	0.99837	-0.078773	0.95472	-0.0096177	0.99936	-0.093545	0.96602	0.12268	0.86333
endonuclease-reverse transcriptase	contig04855	1.0271	0.040378	0.14724	0.91804	0.37757	0.52498	0.20913	0.99997	0.14293	0.86062	0.26505	0.78177	0.19749	0.67466	0.47493	0.48653	0.30659	0.67814	0.20891	0.89035	0.44907	0.28292	0.30184	0.80848	-0.031019	0.99083	0.24732	0.99573	0.05747	0.98804	0.51919	0.46995
	contig04861	0.1879	0.73792	0.25675	0.77699	0.824	0.032412	0.0089203	0.99997	0.52226	0.17826	0.024043	0.9813	1.2427	0.00012161	0.18394	0.79341	0.45512	0.29928	0.052619	0.97377	1.1974	0.00027143	0.079729	0.95865	0.23157	0.83263	-0.045923	0.99936	-0.076931	0.97659	0.081142	0.93144
cg40057 cg40057-pb	contig04864	0.27753	0.47592	0.56057	0.331	0.38256	0.26297	0.34562	0.89299	0.51508	0.10275	0.51845	0.21771	1.0345	0.00014621	0.65856	0.052617	0.61798	0.055778	0.51794	0.28719	0.81602	0.0019252	0.42266	0.41217	0.38156	0.4967	0.034112	0.99936	-0.085782	0.96713	0.19769	0.73559
cg40057 cg40057-pb	contig04866	-0.15687	0.72716	0.55709	0.30298	0.1384	0.73715	0.14399	0.99997	0.14124	0.75406	0.23637	0.64916	0.65902	0.0071405	0.51752	0.12839	0.18678	0.68244	0.29654	0.61601	0.61091	0.012485	0.35695	0.49508	0.18311	0.83767	-0.017806	0.99936	0.033307	0.98867	0.11539	0.85991
	contig04867	-0.037443	0.96799	-0.043606	0.97848	0.38419	0.46784	0.28033	0.99997	0.51467	0.29343	0.60847	0.33193	0.73478	0.043058	0.19101	0.82856	0.50314	0.35459	-0.02069	0.98963	0.6472	0.075973	0.46181	0.5776	0.2126	0.88242	0.35371	0.92823	0.12404	0.96654	0.47298	0.47074
cg10050 cg10050-pa	contig04868	0.31251	0.34425	0.38789	0.5108	0.46301	0.11522	0.28401	0.92864	0.33663	0.28001	0.20634	0.68512	0.73849	0.0017242	0.45087	0.17329	0.14045	0.76525	0.23632	0.70483	0.75001	0.0017161	0.27734	0.61512	-0.16128	0.85118	0.23436	0.91673	-0.07322	0.96938	0.62337	0.061772
	contig04870	0.62667	0.12958	0.29999	0.7452	0.18915	0.72283	-0.034159	0.99997	0.37201	0.42671	-0.11697	0.89969	0.54173	0.094762	-0.28081	0.65275	0.25338	0.66723	-0.021673	0.98807	0.64868	0.042507	0.21058	0.8452	-0.56054	0.37494	0.28064	0.95049	-0.50693	0.4913	0.61196	0.22203
	contig04872	1.585	0.26327	-1.0975	0.58385	1.2294	0.39746	-0.93391	0.88438	1.1372	0.42073	0.0059732	0.99798	1.9356	0.048844	-0.83947	0.658	1.1343	0.50514	-0.98948	0.58499	1.253	0.21422	-0.97686	0.50738	-2.5824	0.036348	-0.68752	0.96106	-1.7741	0.19553	-0.08179	0.9779
cat eye syndrome chromosome candidate 5 homolog	contig04873	0.26551	0.89053	-0.16772	0.95891	1.7751	0.10279	0.13182	0.99997	0.2181	0.89575	-0.80978	0.61902	1.1842	0.14057	-0.069139	0.97585	1.4891	0.15525	0.16388	0.96601	1.6351	0.037309	0.060284	0.99018	1.2439	0.36669	-0.23677	0.99936	0.84164	0.69969	0.36925	0.83803
	contig04874	2.056	0.032327	0.37945	0.8844	1.5799	0.10147	0.43023	0.99997	2.2051	0.014473	-0.33469	0.87351	2.7392	0.00054085	0.076156	0.97193	2.2764	0.016569	0.11688	0.97702	2.9244	0.00036717	0.49733	0.84679	-0.13668	0.97971	-0.4989	0.99117	0.74018	0.84732	0.66699	0.68942
cat eye syndrome chromosome candidate 5 homolog	contig04875	0.38743	0.39902	-0.084229	0.94529	0.52958	0.19481	0.11243	0.99997	0.46754	0.26704	0.1744	0.82563	0.71111	0.023512	0.39289	0.46085	0.33614	0.52459	0.094117	0.9498	0.84898	0.0072219	0.10921	0.9401	-0.19022	0.87758	-0.078402	0.99936	0.16547	0.94107	0.50807	0.33157
hypothetical protein BRAFLDRAFT_127318 [Branchiostoma floridae]	contig04884	0.2631	0.41678	0.16733	0.8045	0.32763	0.26437	-0.052786	0.99997	0.31571	0.28655	-0.26354	0.53987	0.63316	0.0041658	-0.29422	0.41414	0.3044	0.35595	-0.2447	0.66584	0.68999	0.0021968	-0.17359	0.79541	-0.14843	0.85587	-0.15081	0.98597	-0.095255	0.95444	-0.10817	0.85086
testis enhanced gene transcript (bax inhibitor 1)	contig04888	0.57286	0.12243	0.39594	0.59992	0.39036	0.3221	0.26173	0.99997	0.8129	0.016927	-0.20377	0.76628	1.1184	0.00022786	0.065653	0.93893	0.90239	0.011622	0.11558	0.92655	1.0797	0.00044087	0.043141	0.97896	-0.12406	0.92573	0.20296	0.98205	-0.48728	0.43599	0.15497	0.83305
alpha-endosulfine	contig04896	0.97405	0.011098	0.10338	0.92731	0.90426	0.022342	0.10962	0.99997	1.0129	0.0054051	-0.13951	0.8667	1.1489	0.00033878	0.10765	0.90038	0.83651	0.028194	-0.13242	0.91804	1.0991	0.00068026	0.10249	0.94378	-0.012914	0.99466	-0.007213	0.99988	-0.31082	0.80021	0.20945	0.77707
PREDICTED: hypothetical protein [Acyrthosiphon pisum]	contig04918	0.70998	0.1331	0.1588	0.89882	0.78353	0.090302	0.46524	0.91194	1.3999	0.0017691	0.32192	0.68917	1.6799	3.4066e-05	0.2464	0.76083	1.2526	0.0061313	0.19909	0.88409	1.372	0.00043903	0.41284	0.64462	0.34858	0.7533	0.31463	0.95096	0.4635	0.6631	0.71236	0.21193
veliger mantle 1	contig04922	0.97441	0.058146	-0.093532	0.95527	0.60839	0.26175	-0.1232	0.99997	1.4904	0.0024813	-0.6631	0.34758	1.8869	2.9623e-05	-0.96544	0.077566	1.1995	0.017413	-0.56577	0.53659	1.6354	0.00022718	-0.28176	0.83182	0.19867	0.91089	-0.49185	0.83182	0.40677	0.80339	-0.079818	0.95348
	contig04927	0.62654	0.18698	0.19791	0.86892	0.16191	0.7968	0.081497	0.99997	0.678	0.13149	-0.028605	0.98122	1.0685	0.0031246	0.016545	0.98865	0.89034	0.047953	0.17641	0.9003	1.1736	0.0015368	0.38184	0.67545	-0.38747	0.70113	-0.071097	0.99936	-0.2011	0.93546	0.09962	0.92853
	contig04928	0.45669	0.54196	0.25821	0.86994	0.42049	0.55608	0.36538	0.99997	0.82487	0.17005	0.11399	0.93862	1.09	0.020156	0.037777	0.97824	0.94242	0.12765	0.37563	0.79629	1.2497	0.008091	0.14151	0.95122	-0.21284	0.92079	0.10736	0.99936	-0.21821	0.94917	0.37711	0.72387
protein	contig04933	0.32575	0.36091	0.20656	0.78183	0.4278	0.18151	0.075047	0.99997	0.3566	0.28548	0.1266	0.84527	0.67342	0.0066616	0.25919	0.56499	0.19823	0.66353	0.19265	0.80272	0.73344	0.0035507	0.21959	0.75473	-0.12981	0.90292	-0.038817	0.99936	0.068056	0.97329	0.36318	0.39523
PREDICTED: similar to predicted protein	contig04938	0.25809	0.5081	0.35643	0.5868	0.19158	0.62599	-0.21819	0.99997	0.42716	0.18553	0.099387	0.88964	0.78006	0.0021494	0.25504	0.57769	0.42576	0.22139	0.13854	0.88075	0.77693	0.0024554	0.035474	0.98056	0.24626	0.74238	-0.20808	0.95964	0.3115	0.67691	0.17987	0.75965
mitochondrial import inner membrane translocase subunit tim16	contig04940	0.96629	0.0052998	0.36498	0.61346	0.84211	0.017858	0.18954	0.99997	0.46268	0.19114	0.063507	0.94135	0.76275	0.0055121	0.14828	0.82306	0.41135	0.30061	0.21331	0.80248	0.97091	0.00075038	0.35653	0.56484	-0.36014	0.58499	0.3471	0.80384	-0.044093	0.98664	0.51152	0.23697
proteasome isoform a	contig04951	1.2917	0.087645	1.4365	0.24845	1.4068	0.093109	0.26465	0.99997	0.71137	0.40609	0.15929	0.92902	1.2763	0.03104	-0.14812	0.93245	1.1826	0.12918	-0.041444	0.98777	1.0591	0.075662	0.40352	0.83397	-0.42082	0.84592	0.19022	0.99936	-0.23823	0.9589	0.19711	0.90953
proteasome ( macropain) 26s non- 11	contig04952	1.1485	0.0078657	-0.012782	0.99334	1.0527	0.018581	-0.23864	0.99997	0.91578	0.025306	-0.59444	0.31755	1.156	0.001064	-0.70903	0.14235	0.53418	0.2801	-0.54008	0.46115	1.5536	7.7031e-05	-0.50375	0.49432	-0.8587	0.13587	-0.18925	0.99936	-0.62131	0.38621	0.32491	0.65718
	contig04957	1.4999	0.049618	-0.13858	0.97132	1.3168	0.12543	-0.21637	0.99997	0.76809	0.3674	-0.40125	0.86279	1.2044	0.047148	-0.11435	0.96309	1.6079	0.033081	-0.44896	0.89015	0.64061	0.3178	-0.44338	0.89052	-0.04341	0.99168	-0.83369	0.74546	-0.62091	0.78895	-0.32579	0.83236
	contig04958	1.1828	0.057429	-0.38902	0.79377	1.0823	0.1206	-0.14706	0.99997	0.87967	0.22156	-0.44327	0.67922	0.95764	0.052359	-0.55539	0.51843	0.35219	0.70721	-0.062495	0.97934	1.1918	0.015137	-0.23371	0.9028	0.89623	0.34014	-0.31735	0.99254	0.38355	0.87769	4.9459e-05	0.99995
oxysterol binding protein	contig04964	1.2963	0.10145	0.13668	0.95726	1.6599	0.034417	0.57518	0.99779	0.93747	0.2541	0.24612	0.88903	1.096	0.078891	0.91802	0.34528	0.82421	0.38065	0.43321	0.83262	1.2762	0.038406	0.56128	0.74549	-0.081779	0.98329	0.98453	0.62973	-0.52016	0.85492	1.1477	0.23885
	contig04965	0.071239	0.88374	0.34423	0.54073	0.36838	0.1966	-0.011146	0.99997	0.22903	0.49412	0.035592	0.9603	0.57568	0.0086986	0.2248	0.57443	0.17312	0.66938	-0.00072471	0.99917	0.62378	0.0049286	0.16394	0.8127	-0.0082364	0.99466	-0.051808	0.99936	-0.084233	0.96238	0.25329	0.5497
	contig04966	-0.027328	0.96249	0.057771	0.94971	0.2771	0.39135	-0.018064	0.99997	0.096797	0.83081	-0.024655	0.97495	0.5878	0.010175	0.094285	0.87736	0.15449	0.72968	-0.014258	0.98882	0.37986	0.10138	0.019119	0.98914	-0.13531	0.88118	-0.13621	0.99789	0.1832	0.8714	-0.22225	0.64276
btb poz domain-containing protein 10	contig04978	0.13768	0.73279	0.40355	0.46049	0.023917	0.95812	0.1704	0.99997	0.35618	0.21022	0.14979	0.77362	0.69535	0.0016916	0.32672	0.33898	0.080659	0.87019	0.14221	0.85041	0.66571	0.0027439	0.16255	0.8127	-0.0047046	0.99645	-0.16137	0.97807	-0.17785	0.86469	0.22044	0.62237
btb poz domain-containing protein 10	contig04979	0.2046	0.49967	0.20494	0.71406	0.046799	0.90255	0.034664	0.99997	0.20627	0.48846	0.043129	0.94398	0.65934	0.0010259	0.33205	0.25674	0.054955	0.90756	0.20024	0.70378	0.54246	0.0059532	0.028458	0.97959	-0.18027	0.76991	-0.033948	0.99936	-0.095732	0.94649	0.28764	0.39412
protein isoform 2	contig04981	1.1364	0.36477	-0.88369	0.64163	2.4406	0.028664	-0.41691	0.99997	1.9401	0.041686	-0.1741	0.93734	1.6793	0.034748	-0.71882	0.57875	2.5528	0.010072	-0.7551	0.68401	1.9793	0.012882	-0.15442	0.96614	1.06	0.57257	-0.51938	0.97852	0.087554	0.99112	-0.45424	0.79258
	contig04987	-0.31412	0.60053	-0.20318	0.8668	-0.13937	0.83025	-0.72561	0.56419	0.30501	0.60974	-0.4182	0.56338	0.57624	0.11877	-1.4165	0.0026786	0.7745	0.098389	-0.74793	0.27781	0.71072	0.050227	-0.49132	0.53822	0.16163	0.92318	-0.84219	0.29143	0.1126	0.9697	-0.74535	0.18248
	contig04991	0.0012556	0.99873	0.95708	0.2059	0.4217	0.4081	0.36485	0.99093	0.058506	0.94167	0.37479	0.61349	0.77988	0.02944	1.0513	0.025487	0.27207	0.68477	0.43675	0.6123	0.75769	0.034272	0.53225	0.48303	0.4459	0.62067	0.26554	0.97807	0.45818	0.65585	0.5839	0.3252
	contig04992	1.0016	0.17702	-0.48319	0.77322	1.2744	0.071367	-0.70684	0.91875	1.8991	0.0045965	-1.0636	0.25717	2.4333	6.788e-05	-1.068	0.18622	1.7583	0.011758	-0.76528	0.54894	1.8532	0.0014431	-0.67156	0.61576	0.62917	0.68634	-0.58276	0.90642	0.66352	0.70959	-0.53049	0.65717
	contig04993	0.28379	0.67962	-0.046067	0.97899	0.15416	0.82592	-0.42405	0.97305	0.20993	0.77629	-1.068	0.08325	0.52929	0.19262	-1.1344	0.02774	0.30272	0.67814	-0.43693	0.6655	0.54863	0.1738	-0.78224	0.26994	-0.50639	0.59619	-0.66243	0.58901	0.092181	0.97848	-0.69654	0.26711
	contig04994	1.4285	0.0028979	0.39501	0.71267	0.99784	0.036758	0.30773	0.99997	0.68804	0.14847	0.3546	0.66071	0.95071	0.011335	0.51396	0.40104	0.24601	0.74073	0.39141	0.69587	0.97864	0.0094379	0.67199	0.35009	-0.99235	0.10519	0.49142	0.78166	-0.40712	0.75977	0.74422	0.2057
	contig04995	1.5531	0.002052	0.28077	0.82143	1.331	0.010788	0.25079	0.99997	1.0571	0.023799	0.37321	0.65861	1.3198	0.0010791	0.53388	0.40642	0.57584	0.31881	0.52195	0.56966	1.2913	0.0015392	0.69348	0.36462	-0.90512	0.17698	0.67022	0.5834	-0.49288	0.67311	0.80538	0.18591
proteasome assembly chaperone 2	contig04998	0.71309	0.01599	0.35456	0.56721	0.77796	0.012815	-0.013393	0.99997	0.87337	0.0023585	-0.19564	0.7142	1.3043	4.3035e-06	0.11861	0.83987	0.81346	0.0059476	0.22302	0.73777	1.2671	1.1789e-05	0.23324	0.71257	-0.15228	0.86688	0.17044	0.97904	-0.24333	0.78897	0.35848	0.375
	contig05005	0.61976	0.061813	0.34451	0.61789	0.63441	0.055313	0.033452	0.99997	0.47742	0.15048	0.41135	0.37287	0.62882	0.016159	0.059816	0.93891	0.16874	0.7455	-0.020562	0.98684	0.59123	0.023671	0.29313	0.64956	-0.16185	0.87502	0.29521	0.86911	0.053271	0.9817	0.32115	0.51311
actin related protein 2 3 subunit 41kda	contig05008	0.72352	0.013629	0.097757	0.90432	0.49578	0.094397	-0.34398	0.8504	0.44668	0.12851	-0.2989	0.50415	0.66841	0.0045508	-0.46711	0.16036	0.37351	0.26307	-0.30003	0.59007	0.74364	0.0020263	-0.27171	0.63185	-0.3224	0.55259	-0.20646	0.95049	-0.072916	0.9697	-0.15333	0.7877
actin-related protein 2 3 complex subunit 1a	contig05009	0.6625	0.20675	-0.082117	0.96632	0.3928	0.50041	-0.41525	0.99779	0.65212	0.20185	-0.54609	0.52057	1.0147	0.0098209	-0.50258	0.51309	0.60013	0.28903	-0.48671	0.66801	0.92321	0.018614	0.068552	0.97789	-0.26814	0.85424	-0.28447	0.97855	-0.003853	0.99945	0.11694	0.92186
	contig05026	0.95751	0.02352	0.40199	0.6624	0.66346	0.12083	-0.012002	0.99997	0.73391	0.072605	-0.060973	0.95441	0.83247	0.013262	-0.22852	0.75847	0.35702	0.52908	-0.043593	0.97896	1.0575	0.0022001	-0.28006	0.77842	-0.88524	0.10576	-0.18701	0.99936	-0.36419	0.75984	0.29368	0.69109
keratin associated protein 5-7	contig05029	-0.49711	0.29812	0.39521	0.67626	0.11768	0.85112	-0.30287	0.99997	0.55211	0.21866	-0.28777	0.70983	1.1717	0.00087307	-0.18922	0.81832	0.71788	0.10673	-0.030385	0.98564	1.0693	0.0023251	-0.14912	0.91481	0.75719	0.20271	-0.44917	0.77918	0.18997	0.93546	-0.3339	0.64156
	contig05030	-0.14176	0.71506	0.16554	0.80043	0.24997	0.41247	-0.12573	0.99997	0.17313	0.62819	0.033683	0.9614	0.5585	0.0090554	0.3471	0.28577	0.17515	0.65489	0.16598	0.8031	0.60181	0.005335	0.11082	0.89166	0.10745	0.90947	-0.058873	0.99936	0.061106	0.97192	0.36731	0.29105
ser thr-like protein kinase lyk4	contig05031	-0.97229	0.09636	0.63879	0.59261	-0.27662	0.71375	-0.27346	0.99997	0.49153	0.4745	0.047948	0.97605	0.9387	0.039878	0.17461	0.88808	0.52077	0.48511	0.019352	0.99212	0.66682	0.15348	0.11652	0.95945	1.1183	0.1424	-0.63593	0.73852	0.19043	0.95611	-0.24564	0.83293
alpha tubulin	contig05033	0.52894	0.058319	0.040842	0.96632	0.36115	0.21061	-0.15337	0.99997	0.33733	0.24955	-0.50105	0.15565	0.49083	0.025816	-0.32584	0.35002	0.32274	0.31777	-0.20935	0.73543	0.53489	0.015125	-0.13987	0.85379	-0.29354	0.57531	-0.031397	0.99936	0.16333	0.89131	0.23029	0.60695
aminoacylase-1	contig05036	0.545	0.18725	0.34193	0.69855	0.72373	0.065508	0.029116	0.99997	0.41821	0.33203	0.18342	0.81346	0.63814	0.041062	0.36524	0.49841	0.24158	0.67723	0.28128	0.75583	0.87543	0.0053832	0.29092	0.73544	0.014473	0.99466	0.39054	0.8108	-0.028336	0.99237	0.53463	0.29151
	contig05042	0.35954	0.30396	0.084352	0.92728	0.60622	0.054991	-0.14059	0.99997	0.49775	0.10759	-0.050369	0.94903	0.83665	0.0010858	-0.16513	0.76744	0.38628	0.28196	-0.16289	0.85062	0.81454	0.0016243	0.027696	0.98441	-0.074633	0.95433	-0.09794	0.99936	-0.089158	0.96558	0.27942	0.56905
	contig05068	0.52118	0.045271	0.46745	0.30784	0.4275	0.10149	0.26701	0.90937	0.45155	0.071429	0.47187	0.15241	0.54904	0.0078556	0.55219	0.043064	0.1465	0.71204	0.41545	0.29242	0.59363	0.0045025	0.19458	0.73092	0.030106	0.98157	0.047732	0.99936	-0.063325	0.97049	0.29998	0.40134
	contig05070	-0.31071	0.78653	0.10472	0.96808	-0.17745	0.87324	-0.081439	0.99997	-0.242	0.83722	0.0051486	0.99798	-0.043233	0.95812	-0.17716	0.91567	-0.11356	0.93823	0.47039	0.79711	-1.3213	0.025122	0.069558	0.98346	-0.082435	0.9821	-0.28683	0.99936	0.10494	0.98523	-0.15513	0.93275
	contig05072	-0.087769	0.90225	0.17128	0.86994	0.34362	0.44666	-0.020195	0.99997	0.33898	0.46937	-0.1424	0.86628	0.55948	0.075547	0.39676	0.44821	0.7985	0.040326	0.1908	0.8609	0.29108	0.38865	0.10039	0.94605	0.36218	0.66464	0.24774	0.96618	0.27648	0.84368	0.20739	0.78341
tropomyosin	contig05077	0.4054	0.20708	0.12685	0.87611	0.20313	0.58034	-0.20106	0.99997	0.53164	0.068221	-0.57765	0.13152	0.79599	0.0012082	-0.62289	0.051263	0.35546	0.31075	-0.41166	0.40292	0.72849	0.0029573	-0.17146	0.82553	-0.08955	0.93784	-0.39396	0.60861	0.24212	0.80218	-0.23146	0.64751
lipophorin receptor	contig05080	-1.0339	0.036533	-0.30568	0.79746	-0.18644	0.78396	-0.28293	0.99997	-0.075348	0.9306	-0.47344	0.53756	-0.13375	0.78267	-0.81587	0.13686	-0.30561	0.67512	-1.0083	0.13519	0.21727	0.63376	-0.35087	0.75164	-0.43899	0.68669	-0.56971	0.70633	-0.68396	0.41078	-0.29575	0.74531
low-density lipoprotein receptor-related protein 2-like	contig05081	-0.086049	0.94088	-0.1067	0.95674	0.20969	0.80014	0.095593	0.99997	0.73084	0.24177	-0.3262	0.77182	0.98659	0.036396	-0.12351	0.92866	0.89761	0.15233	-0.16155	0.93973	0.8144	0.08674	0.044353	0.98699	-0.093766	0.97384	-0.042935	0.99936	-0.78082	0.45453	0.11773	0.93667
	contig05086	0.63648	0.19981	0.39693	0.70789	0.67562	0.15808	-0.081242	0.99997	0.77436	0.090089	0.15657	0.88094	1.5707	9.019e-05	0.40165	0.54797	1.0806	0.019624	0.14026	0.93159	1.4929	0.00023769	0.10974	0.95139	-0.068108	0.97739	-0.097599	0.99936	0.38106	0.79273	0.13188	0.90205
	contig05087	0.25387	0.51709	0.12205	0.88714	0.3845	0.24681	-0.072907	0.99997	0.093547	0.85398	-0.0022263	0.99798	0.72742	0.0038743	0.11996	0.84856	0.1841	0.69803	-0.23638	0.73705	0.6117	0.014356	-0.017668	0.99064	0.22314	0.78101	0.12202	0.99936	-0.20193	0.86865	0.22465	0.67868
	contig05088	0.23111	0.69375	0.45383	0.60127	0.37312	0.43298	-0.098462	0.99997	0.6632	0.1048	0.2155	0.78728	1.1187	0.00097613	0.40187	0.47749	0.69363	0.10632	0.21456	0.85067	1.0966	0.0013733	0.26553	0.79087	0.44997	0.56198	-0.1211	0.99936	0.55746	0.43977	0.23387	0.76427
nuclear cap binding protein subunit 20kda	contig05093	0.52104	0.12993	0.18493	0.8271	0.2831	0.46679	-0.0034445	0.99997	0.4618	0.17617	-0.3293	0.52401	0.67013	0.011678	-0.031387	0.96763	0.39722	0.30466	-0.00068615	0.9992	0.78177	0.0038228	0.11649	0.9145	-0.38345	0.52119	0.12809	0.99936	-0.26401	0.80871	0.34106	0.48477
rab11fip1 protein	contig05098	-0.48122	0.38472	0.034372	0.98315	0.51119	0.32849	0.57781	0.83119	0.34735	0.56855	0.53563	0.44892	0.78984	0.038274	0.35202	0.62622	0.62	0.24899	0.50471	0.56914	1.015	0.0079043	0.37303	0.71434	0.65275	0.39237	0.22078	0.99831	0.32234	0.85427	0.49518	0.47355
	contig05099	0.19792	0.85271	0.25555	0.88246	0.52728	0.47568	0.46243	0.99779	0.67218	0.33574	0.47769	0.65833	1.0644	0.034824	0.31688	0.78197	1.0946	0.093013	0.40744	0.79239	1.7376	0.0009729	0.39693	0.79646	0.8288	0.42024	-0.063816	0.99936	0.58842	0.71509	0.21254	0.87785
protocadherin fat 3-like	contig05102	-0.20521	0.88473	-0.083329	0.97721	1.6128	0.046041	0.94206	0.84528	2.4561	0.001684	0.66987	0.6122	2.7957	5.9349e-05	0.12292	0.94816	2.4114	0.0027301	0.84538	0.56915	2.7439	0.00012242	0.64839	0.69613	2.1308	0.030466	0.77749	0.828	2.2277	0.015493	1.3052	0.18482
	contig05105	0.48536	0.13673	0.35032	0.59606	0.34824	0.31063	-0.20455	0.99997	0.55971	0.066725	0.082289	0.91184	0.93109	0.00039081	0.16391	0.77161	0.4036	0.25966	0.14842	0.86944	0.89626	0.0007273	0.11645	0.90754	0.14756	0.88291	0.015763	0.99936	0.29447	0.71509	0.18314	0.75569
	contig05108	0.03902	0.97583	0.065272	0.97699	0.29756	0.71608	-0.058087	0.99997	0.65406	0.33989	-0.028656	0.98625	0.8347	0.09525	-0.36673	0.72439	0.79895	0.25216	0.13302	0.95615	1.068	0.030177	-0.053909	0.98441	0.028301	0.99372	0.025914	0.99936	-0.12684	0.97646	0.19825	0.88504
	contig05118	0.21266	0.54603	0.27859	0.63392	0.46682	0.094003	0.076094	0.99997	0.52336	0.048276	0.14605	0.78373	0.51528	0.019204	0.23207	0.56154	0.19951	0.61068	0.31489	0.52118	0.51417	0.019465	0.33313	0.47118	-0.22621	0.72595	0.047522	0.99936	0.028925	0.98889	0.36238	0.31916
	contig05125	-0.33626	0.33556	0.41354	0.50849	-0.1444	0.72535	-0.054833	0.99997	0.30238	0.38985	-0.087112	0.90326	0.58784	0.01655	-0.02336	0.97309	0.17446	0.71204	-0.011429	0.99148	0.51225	0.036972	0.024946	0.98513	0.1576	0.86802	-0.6593	0.17476	-0.14143	0.93181	-0.36948	0.38026
	contig05126	0.10569	0.77886	0.062122	0.93158	0.19816	0.49247	-0.24126	0.92396	0.10507	0.77501	-0.38944	0.22675	0.33554	0.089702	-0.28621	0.35493	-0.14793	0.68589	-0.050565	0.95849	0.43185	0.026715	-0.28397	0.49719	-0.14113	0.84259	-0.21325	0.88454	-0.10594	0.93756	0.0913	0.86084
	contig05137	-0.059684	0.94088	0.48111	0.57412	0.45724	0.30481	0.15848	0.99997	0.53627	0.20898	0.35651	0.59253	0.86187	0.0083652	0.21051	0.7747	0.31347	0.58335	0.22095	0.84172	0.84675	0.0097379	0.35552	0.66554	0.045716	0.9821	0.093385	0.99936	-0.32349	0.80926	0.37815	0.5482
	contig05138	0.050379	0.94898	0.51746	0.51953	0.63577	0.11496	0.29489	0.99779	0.34648	0.46842	0.45216	0.44182	0.68926	0.030071	0.50844	0.29526	0.24558	0.67822	0.32512	0.70378	0.69241	0.029141	0.51676	0.42432	-0.33235	0.71784	0.52054	0.60861	-0.52016	0.46551	0.69928	0.14554
conserved plasmodium protein	contig05149	0.16703	0.78354	0.18419	0.85941	0.62265	0.11888	-0.069398	0.99997	0.44698	0.29343	-0.34493	0.59007	0.69151	0.027743	-0.078516	0.93253	0.41485	0.38991	0.23441	0.81469	0.63178	0.04466	0.18496	0.86715	0.2558	0.81533	0.077767	0.99936	0.39445	0.67196	0.3554	0.56249
zinc finger with ufm1-specific peptidase domain	contig05151	0.79298	0.12961	0.4516	0.68985	1.0842	0.035172	0.16382	0.99997	0.82696	0.097046	-0.27172	0.78029	1.1252	0.0055757	-0.1438	0.89888	0.93976	0.068356	0.24809	0.86075	1.2426	0.0026481	0.3272	0.78899	0.63681	0.45793	0.11943	0.99936	0.47952	0.70744	0.26094	0.79118
	contig05152	2.6533	0.018666	0.19562	0.95775	1.8882	0.09677	-0.12325	0.99997	2.9897	0.0051624	-0.31554	0.90392	3.7226	0.00011347	-0.34551	0.88791	2.889	0.0097103	-0.18079	0.96785	3.1889	0.00074913	-0.0096775	0.99877	1.1995	0.57415	-0.18445	0.99936	1.7479	0.31617	-0.28504	0.91579
stam binding protein	contig05155	0.66012	0.16304	0.30614	0.77699	0.8722	0.055525	0.19493	0.99997	0.64484	0.16066	0.45318	0.51482	1.0931	0.0027243	0.64505	0.22217	0.63802	0.19595	0.4655	0.58534	0.96256	0.0078662	0.52005	0.50295	0.26009	0.84273	0.246	0.98713	-0.34655	0.81976	0.58329	0.33052
amsh	contig05157	0.829	0.05807	0.34215	0.73152	0.88799	0.042699	0.22367	0.99997	0.77973	0.062025	0.44946	0.49363	0.98179	0.0046213	0.74518	0.1184	0.29913	0.62922	0.43795	0.59522	1.237	0.00067637	0.52624	0.46563	-0.11867	0.9431	0.23048	0.98858	-0.28365	0.86202	0.57652	0.30853
	contig05158	0.30518	0.69345	0.55024	0.6351	-0.018817	0.98426	0.42018	0.99758	1.1931	0.021093	0.049749	0.97364	1.338	0.0024538	0.084726	0.94793	0.93052	0.099302	-0.27071	0.85985	1.0724	0.013905	0.22931	0.88853	0.16815	0.93543	-0.6908	0.63281	-0.19502	0.95289	-0.25457	0.81603
collagen adhesion protein	contig05168	1.8134	0.035251	0.43803	0.84344	1.5769	0.067175	0.20603	0.99997	2.314	0.0045381	0.36418	0.835	3.011	5.651e-05	0.22183	0.90801	1.9913	0.019264	0.41403	0.86309	2.4047	0.00080575	0.24006	0.93963	0.46306	0.85495	-0.12096	0.99936	1.2232	0.39161	8.8412e-05	0.99995
	contig05173	0.3012	0.66794	0.25262	0.84766	0.71392	0.17132	0.25087	0.99997	1.428	0.0033607	0.67657	0.33582	1.8375	3.8998e-05	0.1112	0.92483	1.3229	0.0087199	-0.0010664	0.99919	1.368	0.0011564	0.27318	0.83634	0.26028	0.86694	-0.42821	0.8989	0.44313	0.75476	0.23816	0.81431
	contig05174	0.30449	0.61779	0.15383	0.9031	0.4703	0.35151	0.21427	0.99997	1.2369	0.004423	0.045683	0.9696	1.7164	2.5533e-05	0.24608	0.76002	1.3386	0.0034786	-0.024024	0.98839	1.4359	0.00027794	0.34768	0.72563	0.58272	0.44326	-0.10117	0.99936	1.4492	0.0039465	0.6076	0.30921
	contig05175	0.42818	0.24547	0.082477	0.93541	0.50381	0.14627	0.21186	0.99997	1.0876	0.0012345	0.16951	0.7983	1.377	1.0972e-05	0.12332	0.85946	0.88617	0.0087066	0.18675	0.83658	1.0797	0.00025167	0.24892	0.74091	0.30383	0.68551	-0.21878	0.96398	0.61843	0.19551	0.48362	0.2641
	contig05188	0.50328	0.2159	-0.35881	0.66709	0.25046	0.5907	-0.44525	0.8504	-0.032932	0.96246	-0.75835	0.11542	0.40977	0.19262	-1.056	0.0076207	-0.16095	0.79873	-0.34564	0.65572	0.32406	0.31488	-0.5169	0.39202	-0.86948	0.072113	-0.244	0.96522	-0.44884	0.54791	-0.071739	0.94159
	contig05194	1.9074	0.034758	0.82165	0.71799	0.37494	0.78537	-0.53454	0.99997	0.14231	0.92697	-0.036478	0.98979	0.87889	0.23765	-1.7327	0.16293	0.62382	0.62381	-0.20155	0.95927	0.40085	0.62656	-1.2257	0.45861	-0.27265	0.93558	-1.0298	0.84767	-0.092482	0.98889	-0.23835	0.92091
	contig05196	0.19509	0.70958	-0.24071	0.78416	-0.18984	0.68866	-0.46602	0.78697	0.1634	0.76205	-0.767	0.095638	0.18459	0.58074	-1.0071	0.0078341	-0.34706	0.45669	-1.0088	0.027986	0.29324	0.34616	-0.80955	0.077973	-0.60105	0.24543	-0.62487	0.37142	-0.36713	0.66582	-0.16452	0.82223
camp responsive element binding 2	contig05210	0.72126	0.035975	0.16745	0.85125	0.49475	0.15835	0.14122	0.99997	0.6143	0.062975	-0.17127	0.79759	0.64018	0.018747	-0.027949	0.9712	0.40675	0.30482	0.026354	0.9851	0.65869	0.015632	0.23514	0.76482	-0.21927	0.81809	0.41766	0.66106	-0.15359	0.93514	0.60715	0.1395
	contig05218	0.1212	0.84265	-0.18673	0.84351	0.47299	0.21821	-0.53043	0.66851	0.26771	0.56731	-0.48177	0.34413	0.44275	0.13963	-0.56109	0.18187	0.026255	0.97324	-0.44855	0.47876	0.63214	0.030508	-0.34503	0.62363	-0.60044	0.25101	-0.38694	0.77255	-0.23899	0.86469	-0.30322	0.61042
	contig05219	0.6539	0.036605	0.25805	0.71664	0.68898	0.050152	0.21523	0.99997	0.70044	0.017045	-0.22443	0.67855	0.85216	0.00085018	-0.062233	0.93226	0.44627	0.18582	0.082461	0.9422	0.96732	0.00031568	0.18146	0.81775	-0.12574	0.90833	-0.040504	0.99936	-0.081784	0.96809	0.22902	0.66633
	contig05220	0.50848	0.096296	0.29015	0.65299	0.56323	0.061313	-0.06532	0.99997	0.74963	0.0079443	0.055273	0.94135	0.99409	0.00010303	-0.027677	0.96854	0.47672	0.12857	0.079426	0.9422	0.86752	0.0005853	0.1761	0.81476	0.052248	0.97021	-0.20126	0.95761	0.19722	0.85974	-0.065997	0.9291
	contig05221	0.29203	0.39024	0.16748	0.8191	0.48121	0.10279	-0.14968	0.99997	0.77589	0.0051624	-0.037654	0.9603	0.86491	0.00037938	0.045325	0.94793	0.40589	0.20602	-0.05924	0.95927	0.83809	0.00066912	-0.063279	0.95687	-0.014617	0.99234	-0.30455	0.78317	-0.10648	0.95116	0.044324	0.95556
	contig05222	0.13155	0.76209	0.10929	0.89014	0.38733	0.19104	-0.13507	0.99997	0.50085	0.070661	-0.20099	0.68968	0.75146	0.0012817	-0.065163	0.92106	0.19811	0.62922	-0.23895	0.69466	0.9236	0.00022155	-0.13978	0.86209	-0.015303	0.99196	-0.30166	0.77401	-0.028486	0.9893	0.12276	0.83367
	contig05223	0.11733	0.83641	0.03754	0.97563	0.37156	0.32343	-0.18619	0.99997	0.46537	0.18941	-0.10275	0.89673	0.87663	0.0016966	-0.14693	0.82524	0.2609	0.58837	-0.16866	0.86056	0.91614	0.0013037	-0.11852	0.91558	-0.039412	0.9821	-0.36888	0.76034	-0.22895	0.8572	-0.11553	0.87831
	contig05227	0.29082	0.39742	0.40668	0.49186	0.4606	0.12383	0.19951	0.99997	0.49399	0.086852	-0.20082	0.70271	0.53113	0.023861	-0.05623	0.93556	0.48567	0.11349	0.031257	0.97896	0.5789	0.013861	0.22434	0.72677	0.061533	0.96252	-0.24709	0.90361	-0.18568	0.8749	-0.20674	0.68844
mediator of rna polymerase ii subunit 31 homolog	contig05228	0.23784	0.62036	0.33808	0.66709	0.48608	0.18965	0.2109	0.99997	0.55915	0.11579	-0.27068	0.65861	0.70578	0.013403	-0.052233	0.9508	0.66586	0.06692	0.0237	0.98637	0.67456	0.018083	0.21034	0.81598	0.017677	0.99242	-0.024397	0.99936	-0.15725	0.93638	0.11857	0.88001
	contig05230	0.96235	0.22163	0.34631	0.87596	0.21448	0.83872	0.30702	0.99997	0.99937	0.18468	0.66972	0.62341	0.89249	0.13604	0.39657	0.79401	0.11375	0.93714	-0.22692	0.93911	1.4938	0.010864	1.2505	0.29891	-0.60632	0.72136	0.063119	0.99936	-1.3337	0.19672	0.23425	0.88558
	contig05232	1.0712	0.12863	-0.078272	0.97753	0.81852	0.32836	0.11526	0.99997	1.1425	0.087627	0.16751	0.92761	1.1536	0.034584	-0.056844	0.9739	0.98193	0.18544	-0.21691	0.93841	1.5055	0.0061873	0.33587	0.87857	0.02447	0.99466	0.23807	0.99936	-0.19073	0.96602	0.80966	0.38883
	contig05236	0.65895	0.055893	0.31062	0.68123	0.55231	0.10907	0.17561	0.99997	1.1162	0.0010262	0.2804	0.62154	1.5129	3.9212e-06	0.36932	0.40605	1.0293	0.0027524	0.30652	0.66201	1.2199	8.1332e-05	0.33883	0.59338	-0.010849	0.99466	-0.11882	0.99936	0.076953	0.97192	0.2422	0.6834
	contig05237	0.81347	0.04612	0.40059	0.64461	0.53518	0.20504	0.48353	0.84031	1.3514	0.00089415	0.3597	0.58376	1.6212	1.2801e-05	0.57547	0.22587	1.3557	0.00091715	0.72461	0.21671	1.3914	0.00012246	0.49093	0.46808	0.11219	0.94262	0.0048659	0.99997	0.21762	0.91	0.43073	0.45686
	contig05240	0.92879	0.38271	1.2449	0.50229	0.52899	0.6498	-0.26061	0.99997	2.0487	0.01805	-0.17719	0.93862	1.475	0.044654	-0.031436	0.98951	0.71601	0.57262	0.41085	0.87691	0.92068	0.2283	-0.16051	0.96582	-0.29206	0.93306	-0.073519	0.99936	0.18204	0.97659	-0.067433	0.98188
	contig05257	0.56584	0.10406	0.029128	0.98071	0.75672	0.028793	0.018098	0.99997	0.58122	0.079362	-0.18437	0.77739	0.8335	0.0024185	-0.14934	0.81903	0.4587	0.22492	0.097086	0.93829	0.93142	0.0010074	0.0306	0.98441	-0.13643	0.90947	0.44013	0.616	-0.10919	0.95894	0.24799	0.67158
erythrocyte protein band -like 2	contig05270	1.4507	0.01443	0.65742	0.59639	0.85059	0.16338	0.64987	0.88343	1.606	0.0045045	-0.03813	0.98117	1.7652	0.00035804	0.22668	0.84896	1.3762	0.019624	0.12096	0.95913	1.3912	0.0038309	0.0098902	0.99726	0.30868	0.86403	-0.49824	0.90336	0.41837	0.8451	-0.39419	0.71212
cleavage stimulation 3 pre- subunit 77kda	contig05275	0.40537	0.51421	0.26923	0.83183	0.81629	0.10422	0.26272	0.99997	0.61041	0.24753	0.14284	0.90191	1.0395	0.0089201	-0.3135	0.70296	0.37869	0.58736	0.46151	0.64586	0.97487	0.014122	0.21066	0.8862	-0.23365	0.8822	0.097205	0.99936	-0.22104	0.93546	0.57078	0.40823
	contig05276	0.2968	0.34729	0.25578	0.67576	0.65458	0.021841	0.19228	0.99997	0.43246	0.11587	0.064122	0.92241	0.75155	0.0009324	0.27897	0.45384	0.30651	0.35595	0.00022566	0.99961	0.74591	0.0011777	0.23617	0.67527	-0.049264	0.96948	0.086202	0.99936	0.0084987	0.99834	0.54065	0.096985
protein suppressor of forked	contig05277	0.43239	0.69237	0.66224	0.70563	1.1312	0.2097	0.43004	0.99997	0.91697	0.26701	0.93763	0.39333	1.2632	0.041021	0.78464	0.44842	0.78785	0.41287	0.56025	0.75266	1.1319	0.067945	0.69892	0.64396	0.34265	0.89152	0.3621	0.99831	-0.84049	0.61709	0.47008	0.74009
	contig05281	1.9707	0.015879	0.7055	0.7037	1.1719	0.16313	0.73478	0.96103	2.4831	0.0018596	0.83773	0.50117	3.0851	2.4873e-05	0.90421	0.39257	2.493	0.0024855	0.87018	0.56571	2.699	0.00018146	0.55153	0.77315	1.3964	0.22354	-0.084613	0.99936	1.453	0.21256	0.58558	0.67885
	contig05282	0.7623	0.22481	0.40908	0.76759	0.69097	0.26844	0.29737	0.99997	1.5054	0.0064114	0.51156	0.58996	1.7221	0.00039333	0.35168	0.7193	1.507	0.0092694	0.92288	0.30058	1.6497	0.00076192	0.33463	0.82386	0.59741	0.60035	-0.44157	0.93395	0.59806	0.65423	0.17139	0.89831
aminoacyl trna synthase complex-interacting multifunctional protein 1	contig05285	1.5491	0.040748	0.68733	0.6791	0.9246	0.31175	0.5073	0.99997	0.75619	0.3736	-0.37578	0.79786	1.1881	0.048571	0.079116	0.96351	0.76061	0.41715	-0.0060729	0.99808	1.1301	0.060454	0.16017	0.95795	-0.44255	0.83982	-0.7902	0.7758	-0.019043	0.99878	-0.29286	0.85307
solute carrier family 4 (anion exchanger) member adaptor protein	contig05290	-0.29432	0.64742	0.15779	0.90418	0.089825	0.90283	0.15236	0.99997	0.96753	0.031339	0.22337	0.81234	1.2454	0.0012326	0.020532	0.98594	1.002	0.033018	0.48539	0.58676	1.3166	0.00086528	0.29203	0.80212	0.81846	0.21555	0.39966	0.8986	0.32532	0.84924	0.43646	0.54812
	contig05296	0.21433	0.4701	0.22159	0.68419	0.18727	0.52205	0.094742	0.99997	0.27073	0.31082	0.14405	0.7543	0.43548	0.025818	0.29345	0.33902	0.013432	0.97962	0.10413	0.88805	0.35465	0.0715	0.10023	0.89285	-0.26687	0.56021	0.07401	0.99936	-0.29808	0.52022	0.35731	0.24955
a chain ligand-binding domain of glua2 ionotropic glutamate receptor in complex with an allosteric modulator	contig05299	1.0451	0.13909	0.25106	0.90535	0.14134	0.90518	0.30477	0.99997	0.7698	0.29759	0.035515	0.98458	1.43	0.0088283	-0.25918	0.85004	0.069542	0.96151	0.30012	0.88127	0.65918	0.24835	0.001984	0.99929	-0.1387	0.96386	-0.60953	0.87182	0.2362	0.95444	0.076053	0.9707
protein	contig05313	0.45306	0.17691	0.29583	0.6743	0.24389	0.52083	0.090538	0.99997	0.62495	0.039364	-0.14312	0.82243	0.81459	0.0016303	-0.20284	0.69735	0.5196	0.11735	0.12651	0.89854	0.70428	0.0059155	-0.021346	0.98912	0.012684	0.99466	-0.018786	0.99936	0.068622	0.97433	0.29634	0.54363
kiaa0892 protein	contig05315	0.2969	0.5264	0.49377	0.51415	0.192	0.69253	0.3604	0.92996	0.51739	0.17428	0.4328	0.42647	0.6911	0.019859	0.49386	0.26971	0.4507	0.29446	0.53582	0.36784	0.80451	0.0071315	0.62959	0.2265	0.057848	0.9746	0.22213	0.97729	-0.46143	0.505	0.5076	0.29446
ras gtpase-activating protein-binding protein 2	contig05321	0.40342	0.4302	0.8859	0.22219	0.18733	0.74895	0.29021	0.99997	0.70516	0.095177	0.33739	0.64216	0.95521	0.00557	0.82252	0.075425	0.781	0.075721	0.58321	0.40953	0.70946	0.038746	0.36425	0.67753	-0.051699	0.98096	0.39225	0.86612	0.39647	0.72164	0.11781	0.90611
rna polymerase rpb1 c-terminal repeat domain-containing protein	contig05330	-0.46315	0.64358	0.18684	0.93158	0.62388	0.46754	0.36487	0.99997	1.0145	0.17851	0.29847	0.84729	1.3974	0.017221	0.016748	0.99321	1.1783	0.12765	0.67589	0.65129	1.6236	0.0060847	0.50318	0.76753	0.85124	0.51777	0.41026	0.9845	0.72021	0.68701	0.60383	0.61452
	contig05332	0.30437	0.56692	0.11354	0.92554	0.28401	0.57094	0.076481	0.99997	0.74924	0.059133	0.35222	0.60208	0.95184	0.0039763	0.2414	0.72963	0.43571	0.38507	0.17606	0.88651	0.83389	0.011176	0.3374	0.69206	0.08235	0.96473	-0.16879	0.99936	0.41083	0.67311	0.39106	0.53047
	contig05340	0.038825	0.97038	0.46133	0.68985	0.32212	0.6178	0.15506	0.99997	0.44909	0.47019	-0.046789	0.97388	1.1414	0.0058938	0.2187	0.82812	0.6967	0.22657	0.18455	0.9144	0.52739	0.2209	0.36916	0.75173	0.40198	0.74678	-0.2754	0.98858	0.93134	0.20404	0.13272	0.91448
	contig05344	0.0031849	0.99783	0.68125	0.44649	-0.045145	0.95197	0.18913	0.99997	0.56919	0.23038	0.025988	0.98309	0.99279	0.0059374	0.23952	0.76489	0.82065	0.074619	0.37031	0.7009	0.9161	0.011036	0.35278	0.71434	0.93411	0.11149	-0.033465	0.99936	0.51827	0.56991	0.068377	0.95556
	contig05374	0.48506	0.11319	0.10475	0.8976	0.83986	0.00897	0.064574	0.99997	0.64608	0.022384	-0.16694	0.76922	1.2101	1.1119e-05	-0.26537	0.52768	0.76201	0.010062	-0.02778	0.9808	0.9516	0.00024891	-0.022381	0.98714	0.19595	0.81283	-0.28391	0.84291	0.097071	0.95792	-0.067677	0.9269
iq motif containing k	contig05379	0.76211	0.29414	-0.8715	0.5108	0.0081296	0.99483	-0.885	0.74369	0.79847	0.24899	-1.2045	0.14798	0.86611	0.10183	-1.373	0.046797	1.3549	0.037339	-1.1144	0.25096	0.78448	0.14105	-0.8109	0.44954	-0.30587	0.88257	-0.092342	0.99936	-0.36201	0.90491	-0.14567	0.92827
leucine rich repeat containing 48	contig05387	0.33832	0.39023	0.13569	0.88332	0.21924	0.6002	-0.075994	0.99997	0.59946	0.067285	-0.24009	0.68624	0.93834	0.00075514	-0.15481	0.80866	0.46796	0.20904	-0.088147	0.94293	0.68141	0.01179	-0.30837	0.64093	-0.16294	0.878	-0.22383	0.95964	-0.4357	0.48051	-0.071197	0.93252
sap30-like	contig05393	0.5375	0.34227	0.36405	0.75105	0.75944	0.13389	0.37203	0.99779	0.74262	0.1379	0.17478	0.87351	0.93062	0.018936	0.92271	0.087189	0.47499	0.45633	0.70466	0.37922	0.80279	0.043328	0.37758	0.7279	0.13797	0.94248	0.2157	0.99936	0.36692	0.83087	0.78486	0.20649
	contig05397	0.67412	0.028824	0.060039	0.95233	0.35406	0.28347	0.056769	0.99997	0.6171	0.034358	0.071906	0.92102	0.73572	0.0029574	0.23546	0.60734	0.31984	0.39778	0.19929	0.78999	0.67095	0.0064599	0.1558	0.85295	-0.30576	0.61779	0.12465	0.99936	-0.16491	0.91	0.41459	0.30004
	contig05398	0.0075971	0.99438	-0.32711	0.74871	0.070255	0.9208	-0.66963	0.61988	0.6262	0.16554	-0.60403	0.32111	0.86803	0.013964	-0.73407	0.13779	0.4796	0.37027	-0.28436	0.79413	0.76509	0.030214	-0.37045	0.68348	0.18886	0.89904	-0.45443	0.79418	0.64241	0.37909	-0.18358	0.84108
	contig05402	1.7463	0.013867	0.41953	0.81277	0.97198	0.18629	0.24936	0.99997	1.67	0.012681	-0.064915	0.97351	2.2362	0.00019313	0.20369	0.89764	1.4961	0.034547	0.060106	0.98395	2.026	0.00070288	0.11353	0.97081	0.44048	0.82783	0.060364	0.99936	0.86944	0.51531	0.48938	0.69592
	contig05404	0.60869	0.13207	0.60975	0.42269	0.71028	0.07114	0.4755	0.8309	1.1206	0.0030183	0.50097	0.35998	1.4504	3.0583e-05	0.59706	0.18423	1.2342	0.0017827	0.43768	0.53348	1.2819	0.0001956	0.62905	0.26476	0.14627	0.91726	0.3026	0.93035	-0.23433	0.89013	0.57984	0.24088
	contig05405	0.23985	0.68513	0.52401	0.54239	0.16841	0.7705	0.31804	0.99779	0.68325	0.098936	0.56685	0.32944	1.05	0.0020653	0.35806	0.55492	1.0698	0.010237	0.56197	0.41783	1.0565	0.0021782	0.59602	0.3582	0.16084	0.91437	0.13201	0.99936	-0.1558	0.94917	0.40933	0.51658
novel protein	contig05407	-0.23903	0.72371	0.17858	0.88925	-0.29955	0.60101	-0.21708	0.99997	0.32231	0.59298	-0.35244	0.65549	0.7526	0.042462	-0.4732	0.44545	0.28872	0.67413	-0.36424	0.71916	0.56655	0.13334	-0.44356	0.61503	-0.44037	0.64903	-0.47521	0.79418	-1.1166	0.04961	-0.563	0.37142
uncharacterized protein c20orf152 homolog	contig05416	0.37808	0.44501	-0.19798	0.85678	0.11667	0.84554	-0.12663	0.99997	0.64354	0.11794	-0.02813	0.98021	0.69399	0.035993	-0.14506	0.86618	0.41085	0.43156	-0.28749	0.7691	0.73134	0.026662	-0.050015	0.97835	-0.080267	0.96571	-0.12867	0.99936	-0.41086	0.67691	0.14955	0.86582
	contig05422	1.0226	0.065303	0.42952	0.73459	0.99164	0.071888	0.79606	0.6655	1.7501	0.0012859	1.0101	0.14798	2.1884	1.3659e-05	0.36043	0.68442	1.2773	0.019201	1.0845	0.14977	1.9372	9.6508e-05	0.85675	0.28118	0.047556	0.98889	0.37132	0.95604	-0.3377	0.90635	0.79501	0.25376
tetratricopeptide repeat domain protein	contig05424	1.2065	0.02078	1.3556	0.077524	0.63144	0.25412	0.67543	0.77827	1.3577	0.005875	0.53289	0.50117	1.4644	0.00064769	0.7149	0.24781	1.2003	0.019942	0.68899	0.42326	1.4133	0.0010957	0.62927	0.47013	0.19874	0.91454	0.22143	0.99936	-0.088814	0.98052	0.42668	0.61471
	contig05426	0.37126	0.27912	0.07572	0.93514	0.27573	0.44168	0.20082	0.99997	0.19054	0.65073	-0.20597	0.71329	0.36389	0.15336	0.11422	0.85717	0.084898	0.88162	0.027568	0.98235	0.60644	0.014367	0.17119	0.83225	-0.18823	0.83571	0.24036	0.92964	-0.18378	0.89131	0.46001	0.24074
gag protein	contig05432	-0.18967	0.77044	-0.19324	0.86484	0.35842	0.47127	0.18827	0.99997	0.30245	0.58264	0.07743	0.9426	0.56415	0.10233	0.18122	0.82644	0.24947	0.69914	0.17932	0.89	0.68281	0.044754	0.10694	0.94698	-0.059267	0.97827	0.2924	0.95096	-0.10159	0.97087	0.50878	0.3831
endonuclease and reverse transcriptase-like protein	contig05437	0.27407	0.33556	0.13712	0.8296	0.4239	0.094342	0.062627	0.99997	0.41423	0.092381	-0.04087	0.94826	0.69547	0.00075539	0.33018	0.27508	0.19096	0.58676	0.12377	0.86031	0.71859	0.00067542	0.17623	0.75793	0.091447	0.91969	0.21697	0.88987	0.057105	0.97192	0.51401	0.077789
	contig05443	0.24164	0.62048	0.35765	0.64783	0.36125	0.37454	0.13174	0.99997	0.74224	0.032072	0.10793	0.89773	0.98474	0.00096328	0.35371	0.47673	0.71089	0.052336	0.25745	0.76316	0.94301	0.0016829	0.30038	0.68872	0.43557	0.4934	-0.13936	0.99936	0.62384	0.23547	0.23582	0.72089
protein	contig05446	2.0478	0.40103	1.4925	0.63167	2.8044	0.31488	1.6131	0.88343	3.2367	0.1207	1.2851	0.59253	4.5061	0.0074058	1.3476	0.51338	2.6575	0.26353	1.6667	0.52724	2.981	0.076514	1.5425	0.56192	-0.71134	0.92598	0.031124	0.99988	-0.18417	0.99112	0.31943	0.92995
purple acid phosphatase 1	contig05449	2.0691	0.022401	0.094592	0.97379	1.15	0.22526	0.60888	0.99779	2.3074	0.0031312	-0.053537	0.98064	2.3715	0.00042562	-1.3843	0.12096	1.2458	0.14444	-0.79464	0.60673	1.7213	0.0078913	-0.36206	0.87578	0.068326	0.98711	-0.77928	0.83182	-0.76093	0.70935	-1.6809	0.072516
	contig05454	0.59298	0.19716	0.024702	0.9864	0.10193	0.87527	-0.23966	0.99997	0.15328	0.82021	-0.1591	0.86534	0.15676	0.70411	-0.098376	0.92113	0.24637	0.70959	0.091191	0.95756	0.49752	0.16017	0.12339	0.93779	-1.0874	0.047299	0.48338	0.73706	-1.0486	0.048096	0.45228	0.46894
iq domain-containing protein e-like	contig05459	-0.47332	0.39132	0.10379	0.94337	0.27355	0.65028	0.29793	0.99997	0.73714	0.11822	0.17404	0.86547	0.87292	0.021025	0.051894	0.96196	0.77442	0.11779	0.31115	0.78871	1.0297	0.0069054	0.2203	0.86971	0.40965	0.70113	0.050498	0.99936	0.21668	0.93221	0.22537	0.81144
inositol polyphosphate-5-phosphatase f	contig05461	0.28074	0.73569	-0.0023244	0.99825	0.42106	0.53128	0.50647	0.95863	0.47914	0.47925	0.44634	0.63657	0.56304	0.22957	-0.030047	0.982	0.54061	0.44983	0.43025	0.73044	0.94638	0.034484	0.5788	0.56947	-0.2692	0.87903	0.51626	0.86289	-0.24873	0.93546	1.0073	0.13408
	contig05464	0.38916	0.53315	0.51992	0.61733	0.87929	0.07691	0.11328	0.99997	0.65377	0.20298	0.066023	0.95939	1.2161	0.0023458	0.13115	0.90653	1.0755	0.028296	0.33926	0.77397	1.046	0.0082648	0.46402	0.6253	0.43264	0.69469	0.1189	0.99936	0.32429	0.86225	-0.062611	0.9657
transcriptional family protein	contig05465	0.37406	0.47967	0.3796	0.69855	0.78412	0.072023	-0.06755	0.99997	0.50084	0.28266	0.26265	0.74581	0.76859	0.026303	0.14964	0.8689	0.38005	0.50994	0.12961	0.93212	0.8613	0.012858	0.10331	0.95139	0.22512	0.86449	0.1114	0.99936	0.4383	0.66499	0.51257	0.39156
orf2-encoded protein	contig05471	0.45716	0.050917	0.26273	0.58779	0.55522	0.020497	0.20948	0.95851	0.64676	0.003644	0.05825	0.91577	0.92914	1.2787e-05	0.17167	0.6252	0.421	0.07583	0.14866	0.79475	0.90699	3.4483e-05	0.2646	0.50626	0.013467	0.9915	0.17462	0.93468	0.12628	0.908	0.41626	0.13418
zinc phosphodiesterase elac protein 2	contig05488	0.088621	0.87351	-0.018703	0.98627	-0.13989	0.74796	0.0065345	0.99997	0.26399	0.50059	-0.22742	0.68588	0.49706	0.053489	-0.3051	0.48856	0.099084	0.8639	-0.26486	0.69843	0.52283	0.04093	-0.096217	0.93383	-0.25425	0.7389	-0.26856	0.90361	-0.31043	0.69205	0.098834	0.8916
phospho-2-dehydro-3-heoxyheptonate aldolase	contig05503	0.59111	0.50193	-0.24648	0.89899	0.74748	0.34029	-0.16435	0.99997	1.1521	0.099767	-0.63955	0.57704	1.4586	0.010106	-0.75527	0.4186	1.6503	0.019481	-0.84142	0.49826	1.7291	0.0028269	-0.70753	0.59146	0.10225	0.9777	-0.85825	0.66788	-0.23809	0.9556	-1.6221	0.047397
	contig05530	0.76095	0.03325	0.12483	0.8976	0.88893	0.016179	-0.010057	0.99997	0.4155	0.2756	-0.15973	0.82261	0.56554	0.047408	-0.0028327	0.99865	0.32083	0.49154	-0.093359	0.94281	0.8106	0.0047879	0.3319	0.62862	-0.53114	0.32195	0.31558	0.87506	-0.31938	0.73854	0.5254	0.24171
gtp-binding adp-ribosylation factor homolog 1 protein	contig05531	0.91433	0.15913	0.1668	0.91735	0.69943	0.29898	0.14781	0.99997	0.78239	0.2311	0.015519	0.99261	1.3642	0.0060693	-0.031724	0.98058	0.48929	0.56717	-0.17285	0.92839	1.3642	0.0062723	-0.0054665	0.99864	0.0030636	0.9986	-0.29011	0.99117	0.42777	0.8182	0.25034	0.82289
ferric-chelate reductase 1	contig05552	1.4863	0.016811	-0.020692	0.99209	1.4208	0.025509	0.59648	0.93368	0.85528	0.1795	0.33876	0.77583	0.83057	0.099245	0.84008	0.25797	0.1796	0.87315	0.32977	0.8469	0.71015	0.16389	0.59297	0.61652	-0.22965	0.91845	1.4496	0.1255	-1.1625	0.17822	1.5589	0.027442
	contig05554	0.73217	0.086394	0.22777	0.83035	0.24321	0.64762	0.113	0.99997	0.18133	0.77297	-0.1054	0.91545	0.74835	0.02516	-0.47818	0.37249	-0.055175	0.94791	0.0094998	0.9954	0.6834	0.040998	-0.16816	0.89356	-0.36167	0.70113	-0.72858	0.35536	-0.22455	0.91028	-0.48732	0.4001
ubiquitin c	contig05557	0.48544	0.31511	0.25022	0.81587	0.41716	0.38953	-0.090567	0.99997	0.37075	0.47426	-0.15861	0.86534	0.79548	0.020349	-0.26765	0.70749	0.76762	0.082035	-0.12543	0.93566	0.96135	0.0055482	0.025371	0.99057	0.35416	0.72348	-0.30161	0.95049	1.0571	0.045845	0.02956	0.98253
protein llp homolog	contig05560	0.64341	0.11152	0.11459	0.91921	0.62476	0.11794	-0.21472	0.99997	0.29159	0.56088	-0.29335	0.66619	0.59331	0.061288	-0.071355	0.93919	0.2781	0.62085	-0.39212	0.602	0.66543	0.034276	-0.02226	0.99064	-0.49036	0.46471	0.0016496	0.99997	-0.49698	0.49432	0.32436	0.61314
dna polymerase v family	contig05570	0.14962	0.78272	-0.21172	0.80719	-0.012098	0.98426	-0.071023	0.99997	0.32912	0.42129	-0.58169	0.20483	0.53222	0.059495	-0.13728	0.84497	0.26965	0.58184	-0.31716	0.65948	0.62611	0.025271	-0.21751	0.80113	-0.32315	0.67031	-0.35594	0.80254	-0.18731	0.91118	0.25396	0.67571
	contig05576	0.71231	0.15679	0.12553	0.92895	0.51402	0.33132	0.40753	0.97969	0.84892	0.068519	-0.026108	0.9841	1.1645	0.0027358	0.082537	0.94279	0.62327	0.25142	0.094894	0.96058	0.8676	0.02369	0.082464	0.96715	0.25284	0.86227	0.16071	0.99936	0.24455	0.92097	0.72332	0.23159
	contig05579	0.16319	0.69995	0.087289	0.91815	0.41966	0.17026	-0.10831	0.99997	0.15807	0.70649	0.060006	0.93433	0.52259	0.02742	0.44195	0.19796	0.3235	0.36582	0.17532	0.81714	0.52104	0.027724	0.051369	0.96664	0.15875	0.85878	0.13712	0.99831	-0.11988	0.94375	0.32401	0.44116
u729_aedae ame: full=upf0729 protein aael015238	contig05602	0.49161	0.20596	0.24942	0.7749	0.40794	0.30345	-0.25513	0.99997	0.85785	0.012548	0.0074093	0.9944	1.3704	2.5928e-05	-0.012162	0.98975	0.56412	0.14336	-0.071461	0.96088	1.1729	0.00022718	-0.069711	0.96326	-0.15812	0.8962	-0.25566	0.95049	-0.16844	0.93171	0.027136	0.98175
ring domain	contig05603	0.35881	0.26771	0.07992	0.92652	0.35059	0.26431	-0.12162	0.99997	0.49804	0.083237	-0.16385	0.77037	0.82797	0.00064769	0.0033434	0.99735	0.20729	0.62173	-0.054731	0.96269	0.7332	0.0023296	-0.18714	0.7927	-0.17654	0.83673	-0.037778	0.99936	0.015828	0.99521	0.30497	0.47539
60s ribosomal protein l22	contig05620	0.32885	0.45259	-0.13727	0.89141	0.37929	0.34776	-0.19317	0.99997	-0.019153	0.97885	-0.55125	0.25853	0.10605	0.76703	-0.92301	0.015537	0.14866	0.80843	-0.19109	0.84946	0.28821	0.35779	-0.15405	0.88699	-0.52047	0.36049	-0.13968	0.99936	-0.10846	0.96399	-0.087437	0.92108
	contig05629	0.84173	0.17564	-0.012006	0.99503	0.182	0.82906	-0.039701	0.99997	1.2815	0.021638	-0.041903	0.9792	1.6459	0.00070347	0.0049464	0.99852	0.74535	0.26633	-0.21484	0.91113	1.4891	0.0020672	0.11197	0.96338	-0.14907	0.94931	0.16396	0.99936	0.24292	0.94374	0.44841	0.65262
	contig05630	0.44855	0.38898	0.028869	0.98498	0.20765	0.72916	-0.079641	0.99997	0.72245	0.10169	-0.20003	0.82359	0.95661	0.0075098	-0.169	0.85164	0.2446	0.72476	-0.25691	0.82535	0.9621	0.0074062	-0.094417	0.9585	-0.48969	0.55682	0.017515	0.99936	-0.1923	0.93796	0.35813	0.6269
	contig05642	0.83848	0.43632	-0.51128	0.82313	1.103	0.25048	-0.20982	0.99997	1.853	0.031321	-0.62711	0.69539	2.1354	0.003361	-0.99503	0.39581	1.766	0.052336	-0.96309	0.56553	1.3001	0.073649	-0.29942	0.92103	0.53608	0.83898	-0.38464	0.99936	0.72779	0.8016	-0.24367	0.90789
	contig05659	1.4562	0.034402	-0.022062	0.9926	0.82495	0.25752	-0.56022	0.99093	1.4739	0.023161	-0.73747	0.47447	1.7	0.0021707	-0.82883	0.33136	1.5867	0.019624	-0.57651	0.68888	1.7349	0.0020173	-0.38758	0.82665	1.2082	0.20271	-0.03659	0.99936	1.4337	0.10803	-0.20291	0.89699
fibropellin ia	contig05660	2.119	0.023668	0.38519	0.87905	3.0345	0.0078348	0.36701	0.99997	3.095	0.00094518	0.0061412	0.99798	3.9088	8.9782e-06	0.21613	0.91935	2.9397	0.0018756	0.51067	0.83746	3.07	0.00019422	0.17662	0.96338	0.32277	0.93443	0.1567	0.99936	0.65204	0.87629	0.13127	0.95993
3 -phosphoadenosine 5 -phosphosulfate synthase 2	contig05673	1.0976	0.1494	1.0542	0.46829	1.1303	0.12859	0.51718	0.99997	0.78241	0.33303	-0.078237	0.96806	1.6648	0.0045657	0.14026	0.93556	0.80347	0.36047	0.20743	0.93841	1.1222	0.05545	0.02707	0.994	0.47847	0.81347	-0.077392	0.99936	0.85247	0.56056	0.20361	0.90479
frfamide precursor protein	contig05678	2.3519	0.012798	0.17872	0.95399	1.3049	0.18147	0.29968	0.99997	2.7602	0.0025574	0.024797	0.99322	3.3765	4.7127e-05	0.055936	0.97987	2.3566	0.012078	0.1817	0.96212	2.9881	0.00027295	0.26643	0.93936	0.41362	0.89494	-0.19563	0.99936	1.5076	0.29486	0.31551	0.87916
	contig05679	3.5732	0.0116	0.70127	0.84914	2.2204	0.12313	0.51027	0.99997	4.8029	0.00077527	0.43694	0.89252	5.7311	1.1446e-05	0.44883	0.88366	4.4221	0.001963	0.39344	0.93902	4.9034	0.00011377	0.64498	0.87314	1.2718	0.6844	-0.56604	0.99936	2.626	0.18522	-0.16161	0.97017
	contig05692	0.51764	0.47548	0.81411	0.50058	0.45262	0.52607	0.75472	0.79749	0.59997	0.3752	0.72087	0.39658	0.94074	0.049492	0.88574	0.1996	1.339	0.023937	0.96814	0.28719	1.0644	0.025218	0.79342	0.40791	0.2955	0.87438	-0.42563	0.94663	-0.091054	0.98343	0.093162	0.95372
	contig05694	-0.31293	0.62982	0.61006	0.53375	0.20194	0.75862	0.21643	0.99997	0.58848	0.24814	0.25094	0.78651	1.0126	0.0083191	0.20129	0.83002	0.78769	0.1157	0.20821	0.88454	0.79966	0.036988	0.18915	0.89642	0.37942	0.74138	-0.49242	0.79493	0.39556	0.78793	-0.1947	0.84543
	contig05719	-0.45338	0.64329	0.61957	0.81865	-0.35355	0.70882	0.10927	0.99997	-0.49666	0.59723	0.57393	0.78229	-1.5627	0.0072791	1.7398	0.15713	0.12814	0.93538	0.38712	0.90626	-0.6644	0.27238	1.2639	0.45285	0.14454	0.96471	0.039833	0.99936	-0.17763	0.96981	-0.034664	0.98746
isoform a	contig05722	0.17044	0.78075	0.34677	0.69919	0.52043	0.20994	0.030845	0.99997	0.57547	0.15339	0.10488	0.91053	1.017	0.0016395	-0.0038121	0.99804	0.65066	0.11631	-0.0071018	0.99646	0.74646	0.018489	-0.16672	0.88853	-0.2072	0.86334	-0.040283	0.99936	0.11679	0.96455	0.038062	0.97538
	contig05732	-0.00023	0.9997	0.34527	0.53375	0.0015703	0.99757	0.29086	0.90023	0.21692	0.5197	0.075822	0.9043	0.47004	0.030301	0.21392	0.59369	0.32203	0.30815	0.19672	0.75399	0.39751	0.068654	0.19446	0.75125	0.23825	0.69444	-0.1673	0.97131	0.15931	0.89296	0.068916	0.91575
loc495387 protein	contig05737	0.99375	0.050703	0.31383	0.79746	1.239	0.017759	0.95986	0.34849	0.71495	0.1644	0.53588	0.48201	1.0072	0.012187	1.0751	0.043351	0.031163	0.97708	0.5346	0.56861	0.93326	0.020126	0.7543	0.31282	-0.27569	0.85341	0.83023	0.4052	-0.66044	0.46206	1.3088	0.023227
low-density lipoprotein receptor-related protein 2	contig05743	0.81843	0.12304	0.38759	0.74367	0.43881	0.4656	0.31984	0.99997	1.7416	0.00080039	0.46243	0.57813	2.1988	6.8798e-06	0.674	0.27907	1.7021	0.0010813	0.46175	0.66303	1.7491	0.00014185	0.65064	0.43982	0.2694	0.86271	0.20456	0.99936	0.59334	0.56885	0.45026	0.58124
	contig05744	1.5892	0.052751	0.35537	0.87023	0.8943	0.31217	0.099363	0.99997	2.6133	0.0011994	0.27095	0.88228	3.2934	1.1119e-05	0.44448	0.75639	2.4911	0.0023406	0.28157	0.91746	2.6916	0.00017313	0.34568	0.88524	0.9663	0.49738	-0.26836	0.99936	1.2989	0.29164	0.14344	0.94624
	contig05757	-0.92206	0.46148	-1.0522	0.78607	-2.0674	0.1574	-0.76848	0.99997	-0.82513	0.6646	2.4276	0.27347	-1.9568	0.037326	-0.95944	0.66008	-1.4658	0.20806	-0.22637	0.96419	-0.50772	0.62724	-0.72548	0.83171	1.96	0.48929	1.2788	0.86485	-0.94575	0.838	0.74624	0.78051
zinc dhhc-type containing 14 isoform 2	contig05759	-0.090738	0.96086	0.16013	0.95726	0.45597	0.73577	0.62952	0.99997	-0.22786	0.88054	0.37231	0.84247	0.61024	0.44102	2.181	0.020699	-0.18594	0.91514	0.3896	0.88454	0.8248	0.27492	0.44556	0.85875	0.89896	0.61635	0.44469	0.99573	-0.060727	0.99294	0.99023	0.43439
	contig05770	0.90287	0.066582	0.43065	0.69283	0.087306	0.90837	0.27535	0.99997	0.96829	0.036491	-0.060296	0.9618	1.2807	0.001245	0.20625	0.82704	1.168	0.015552	0.14168	0.93566	1.2137	0.0022918	0.1765	0.90955	-0.16491	0.92652	-0.097376	0.99936	-0.036184	0.99225	0.13506	0.90521
apoptosis antagonizing transcription factor	contig05776	0.27794	0.49298	0.44541	0.50505	0.5027	0.1346	0.22261	0.99997	0.45193	0.18192	0.23536	0.68348	0.85682	0.0014239	0.4941	0.1936	0.43193	0.24422	0.27378	0.69644	0.83256	0.0020844	0.43585	0.41166	0.058472	0.96955	0.0087555	0.99936	-0.24967	0.82247	0.29323	0.57068
	contig05778	0.4003	0.37071	0.36628	0.66675	0.60654	0.12316	0.281	0.99997	0.42167	0.32152	0.49905	0.35634	0.55565	0.075417	0.74765	0.071719	0.38485	0.431	0.55108	0.37447	0.73849	0.016842	0.53909	0.37311	-0.037014	0.98493	0.27442	0.94924	-0.10635	0.96634	0.82945	0.062932
	contig05784	-0.48878	0.1137	0.16956	0.82411	-0.44279	0.15052	-0.032111	0.99997	-0.53456	0.066416	0.021184	0.97974	-0.57891	0.015854	0.040676	0.95335	-0.92229	0.0023575	0.040558	0.97451	-0.62119	0.009916	0.12213	0.89356	-0.31603	0.58494	-0.017366	0.99936	-0.18619	0.88084	0.32005	0.45704
valosin containing protein	contig05788	0.18891	0.76357	0.44969	0.6031	0.32552	0.50715	0.16648	0.99997	0.59253	0.15782	0.079408	0.93867	0.83432	0.011252	0.052582	0.95605	0.86643	0.035118	0.10263	0.94682	0.66439	0.043913	0.25977	0.79626	0.14476	0.92471	-0.19464	0.99831	0.51251	0.50333	-0.22196	0.78097
	contig05800	0.3777	0.20895	0.22966	0.72212	0.34558	0.24681	0.11405	0.99997	0.3098	0.31365	0.1882	0.71052	0.42239	0.062172	0.34382	0.32596	0.073343	0.88823	0.1688	0.81296	0.51859	0.020764	0.28223	0.58728	-0.32085	0.52764	0.18877	0.95866	0.002314	0.99945	0.57066	0.081312
	contig05810	0.68744	0.53583	-2.0632	0.34349	-0.0072605	0.99701	-1.2778	0.85886	-0.037105	0.98298	0.38251	0.90326	2.7696	0.0045689	-2.1822	0.095744	-0.097051	0.95816	-1.8205	0.3253	-0.38327	0.66966	-1.5666	0.36909	0.81647	0.59287	-1.1402	0.62112	-0.3018	0.94649	0.301	0.91448
histidine triad nucleotide-binding protein 2	contig05830	0.54474	0.12023	0.22973	0.7787	0.4609	0.19188	-0.09122	0.99997	0.54671	0.10417	-0.29347	0.59893	0.77732	0.0045035	-0.16185	0.80002	0.52683	0.14422	-0.29702	0.67521	1.0067	0.00050375	0.0094909	0.99548	-0.20726	0.83502	-0.071129	0.99936	-0.16164	0.92926	0.032907	0.97505
heterogeneous nuclear ribonucleoprotein u-like 1	contig05848	0.068282	0.97326	-3.1286	0.16938	-0.93285	0.56766	-3.311	0.11667	-0.23469	0.88971	-3.1166	0.075994	-0.39235	0.67752	-3.4008	0.020823	-0.4602	0.80014	-3.8795	0.03208	0.35921	0.73121	-2.6513	0.11961	-0.12139	0.98077	0.36291	0.99936	0.23083	0.97549	0.087053	0.986
	contig05852	1.2339	0.1027	0.086209	0.97397	1.3529	0.068546	0.2608	0.99997	1.8377	0.0085117	0.010095	0.99644	1.9963	0.00097241	-0.00018391	0.99995	1.5978	0.029501	0.070122	0.98057	1.6389	0.00583	0.36248	0.86116	0.78957	0.57206	-0.34192	0.99831	1.2009	0.27809	0.79556	0.44799
	contig05863	1.8054	0.019901	1.1571	0.45161	0.5774	0.53416	0.027351	0.99997	0.52994	0.60081	0.56875	0.67187	0.75448	0.24367	0.079494	0.96439	0.50327	0.65706	-0.12007	0.96907	0.76145	0.23876	0.22653	0.93564	-0.18891	0.9519	-0.70212	0.8672	-0.098812	0.98677	-0.10977	0.95974
dna polymerase subunit gamma-1	contig05867	-0.07831	0.89197	0.16564	0.84297	0.034338	0.94887	-0.033959	0.99997	0.296	0.43217	0.44138	0.31896	0.5933	0.020457	-0.0095501	0.99104	0.24035	0.59476	-0.17718	0.83658	0.49583	0.053886	0.12165	0.90352	0.34826	0.56339	-0.090215	0.99936	-0.027148	0.99139	-0.11077	0.87335
	contig05874	1.8728	0.014156	0.30645	0.88329	1.3721	0.07406	0.19571	0.99997	2.5915	0.00076968	0.097244	0.96086	2.8637	2.6607e-05	0.30453	0.84091	2.2128	0.0038518	0.027698	0.9916	2.3663	0.00032372	0.19807	0.94532	0.29673	0.91214	-0.096866	0.99936	0.77276	0.66416	0.35142	0.81834
	contig05882	0.48374	0.12023	0.002422	0.99729	0.42644	0.17131	-0.25451	0.98204	0.4911	0.099423	-0.27673	0.56837	0.74727	0.0022881	-0.18885	0.70663	0.33889	0.34723	-0.20549	0.77845	0.65261	0.0072278	-0.058853	0.96179	-0.14638	0.87755	0.18051	0.97729	-0.014244	0.99617	0.23536	0.64171
	contig05884	1.7095	0.033215	0.86582	0.60599	0.80398	0.36607	0.82377	0.9096	1.7209	0.023064	0.24174	0.89505	2.4452	0.00026481	0.35535	0.81596	1.7614	0.026415	0.55344	0.77019	1.9703	0.0025242	0.59665	0.73451	0.80116	0.61454	-0.13069	0.99936	1.2187	0.33225	-0.10658	0.96218
	contig05898	-0.023845	0.97864	0.34648	0.72734	0.047522	0.94742	0.14389	0.99997	0.29814	0.59499	0.40363	0.55301	0.9439	0.0061698	0.54139	0.30535	0.31307	0.60804	0.32535	0.73701	0.90455	0.0087103	0.29095	0.77278	0.16721	0.91215	-0.098298	0.99936	-0.30123	0.84634	0.087058	0.93538
predicted protein [Nematostella vectensis]	contig05907	1.129	0.086883	-0.54461	0.74367	1.5035	0.023947	-1.0317	0.56745	0.86775	0.19417	-0.71385	0.45979	1.0384	0.045157	-0.028954	0.9858	0.50188	0.57543	-0.80078	0.46766	0.72707	0.17115	-1.2316	0.15274	0.033535	0.99216	-0.14544	0.99936	0.12407	0.97779	0.28386	0.83007
nadh dehydrogenase	contig05909	1.1402	0.031025	-0.29412	0.82546	0.71671	0.18745	-0.35742	0.99997	0.82026	0.11599	-0.79226	0.2592	1.215	0.0040178	-0.39023	0.62336	0.52944	0.42089	-0.6842	0.4335	1.2218	0.0040851	-0.67461	0.43014	-0.99539	0.15668	-0.28294	0.98787	-0.34343	0.86437	0.15886	0.89417
	contig05912	-0.1885	0.91106	0.1598	0.95726	-0.12675	0.93258	-0.51192	0.99997	-0.49783	0.69366	0.43091	0.81061	-1.0268	0.16824	-0.5296	0.73035	-0.40832	0.78385	0.099249	0.97862	-1.588	0.027649	-0.3026	0.91974	-0.3152	0.92471	-0.0018951	0.99997	-0.65931	0.83506	-0.01914	0.99489
scbp2 protein	contig05917	1.5653	0.0058316	0.9618	0.34959	1.1058	0.051959	0.85788	0.61143	1.6758	0.0021693	0.90931	0.21821	1.8043	0.00015711	1.0947	0.068625	1.1832	0.034624	0.72812	0.4373	2.0987	5.5115e-05	1.0848	0.14717	0.97436	0.21555	0.67838	0.6683	1.2067	0.096869	0.77243	0.28893
	contig05918	1.4858	0.0047769	0.80082	0.43083	1.0396	0.047929	0.37777	0.99997	1.5987	0.001673	0.76599	0.27295	1.6488	0.00017447	0.8474	0.14665	1.2376	0.016384	0.65008	0.46102	1.9029	6.6107e-05	0.93092	0.19272	0.89714	0.21723	0.60675	0.70011	1.1682	0.078833	0.68023	0.32048
	contig05919	0.63376	0.69395	1.4807	0.51947	2.3417	0.042465	3.5511	0.017437	-0.48237	0.7782	0.78627	0.6961	0.28026	0.8261	1.2686	0.38742	-0.51123	0.785	0.91967	0.7074	1.1909	0.20625	0.8978	0.71089	0.15001	0.97971	-0.37161	0.99936	0.95864	0.77453	1.25	0.43507
	contig05947	0.57745	0.29687	-0.54462	0.60127	0.37673	0.52659	-0.59336	0.84031	0.36311	0.56744	-0.70011	0.30181	0.83335	0.036001	-0.80925	0.14829	0.59669	0.30005	-0.85207	0.24932	0.7556	0.05783	-0.48782	0.59968	-0.61215	0.47347	-0.024682	0.99936	0.045165	0.99107	0.66318	0.30884
zinc finger protein	contig05953	1.1103	0.13548	0.86117	0.61153	1.6595	0.024682	0.94653	0.84557	0.67471	0.42073	0.70155	0.59197	1.0046	0.08385	1.1762	0.20766	0.47419	0.65112	1.6881	0.12739	0.70426	0.24137	1.1062	0.38314	0.22855	0.93333	1.3562	0.281	-0.4428	0.88146	1.2979	0.1323
	contig05962	0.17862	0.76475	0.0089368	0.99492	0.20966	0.67954	-0.3214	0.99093	0.66749	0.081219	-0.32152	0.62229	0.99345	0.0018001	-0.31815	0.57828	0.6444	0.11459	-0.21247	0.84065	0.8241	0.0087005	-0.27144	0.76298	0.32937	0.71575	-0.38842	0.81685	-0.090637	0.97192	-0.15788	0.84645
cyclophilin b	contig05965	0.32771	0.30577	0.20234	0.7653	0.47732	0.09847	0.33833	0.84487	0.25254	0.45928	0.093377	0.8854	0.735	0.0015879	0.24847	0.54293	0.23134	0.55483	0.0069723	0.99463	0.70025	0.0026944	0.18625	0.78597	0.028912	0.98381	0.37177	0.61318	-0.089619	0.96049	0.42224	0.24253
peptidyl-prolyl cis-trans isomerase	contig05966	0.48198	0.12317	0.23986	0.73323	0.67259	0.029622	0.31957	0.90626	0.67474	0.018914	0.61095	0.11227	0.98382	0.00014203	0.71105	0.025543	0.42332	0.20396	0.61607	0.14212	0.92431	0.00037963	0.5248	0.21168	0.17024	0.84977	0.29982	0.81917	0.075486	0.9697	0.32239	0.45831
actin-related protein 8	contig05971	-0.15189	0.75382	0.15651	0.8529	0.056813	0.91053	-0.39636	0.81611	0.45395	0.1654	-0.49007	0.25182	0.89417	0.00071632	-0.37604	0.35453	0.55815	0.091874	-0.0053375	0.99663	0.86374	0.0011856	-0.23209	0.74692	0.2477	0.74911	-0.60877	0.27371	-0.28037	0.75519	-0.55864	0.15064
peptide methionine sulfoxide reductase	contig05972	0.79351	0.18379	-0.193	0.90104	0.46069	0.48859	-0.38664	0.99997	1.2386	0.020499	-0.61005	0.47222	1.3122	0.0038483	-1.0166	0.099687	0.83164	0.17104	-0.70952	0.45841	1.2675	0.0053381	-0.47927	0.67638	-0.04977	0.98641	-0.42158	0.93583	-0.052556	0.99083	-0.41335	0.66925
ovulatory protein-2 precursor	contig05974	0.29509	0.64489	0.032563	0.98341	0.58656	0.23822	0.19479	0.99997	0.92742	0.038666	0.00040263	0.99949	0.89808	0.016621	0.037328	0.97203	0.67665	0.18544	0.16048	0.91858	0.99689	0.0082191	-0.04213	0.98441	0.3623	0.74991	-0.16165	0.99936	0.20122	0.93894	0.054998	0.96882
	contig05983	0.65063	0.54021	0.78831	0.66815	1.4519	0.086175	0.15775	0.99997	1.5363	0.057335	0.33159	0.85199	1.3401	0.045892	-0.27206	0.87887	0.45873	0.72357	0.09865	0.97712	1.3584	0.042187	-0.069513	0.98739	-0.17258	0.96353	-0.48764	0.97852	-0.79977	0.76568	0.48974	0.75253
splicing arginine serine-rich 7	contig05984	0.72979	0.01299	0.85154	0.045431	0.89669	0.0052178	0.70996	0.13466	0.75291	0.0067727	0.18338	0.73645	1.0325	5.8222e-05	0.59641	0.056975	0.45906	0.13988	0.332	0.52724	1.0336	9.9348e-05	0.52193	0.2	-0.33727	0.52288	0.036761	0.99936	-0.11888	0.94375	0.45756	0.21216
	contig05985	0.090605	0.91437	0.55251	0.55148	-0.014606	0.98504	0.28088	0.99997	0.81836	0.059118	-0.17127	0.86053	0.87719	0.014261	0.35421	0.5925	0.52745	0.31428	0.17016	0.90658	0.8521	0.01731	0.22578	0.85539	0.22943	0.86867	-0.11283	0.99936	-0.57424	0.4834	0.093889	0.93292
translationally-controlled tumor protein	contig05989	-0.29123	0.43412	0.10206	0.90664	0.33831	0.32251	-0.50055	0.56175	-0.017083	0.97811	-0.8256	0.03062	0.32794	0.2065	-0.71388	0.029497	0.10153	0.85613	-0.47	0.34038	0.28002	0.28789	-0.41449	0.41006	0.27728	0.6904	-0.44474	0.54354	0.30444	0.69041	-0.40129	0.33461
brca1 associated ring domain 1	contig05992	2.6167	0.061813	0.018578	0.9961	1.7903	0.21515	-0.46744	0.99997	3.1288	0.016948	0.51796	0.83829	2.0963	0.033839	-0.23232	0.93658	1.7245	0.20309	0.49154	0.89814	0.71002	0.52035	0.19584	0.9709	1.4062	0.60209	-0.59768	0.99593	1.5697	0.57943	-0.75124	0.7397
phenazine biosynthesis-like domain-containing protein	contig05995	1.6159	0.0064092	0.55656	0.66641	0.92262	0.12267	0.50379	0.97832	1.596	0.004423	0.017229	0.99176	2.0209	7.3247e-05	-0.18377	0.88538	1.4444	0.013426	0.59378	0.59661	1.8391	0.00029791	0.17492	0.93438	-0.0020966	0.99904	-0.14937	0.99936	0.0088274	0.99945	0.011577	0.9948
nicastrin	contig06001	-0.40789	0.69776	0.55799	0.74357	-0.50862	0.57164	1.4328	0.33604	-1.4329	0.042108	0.91457	0.38055	-0.88413	0.14302	1.0186	0.2444	-0.20678	0.87781	1.3217	0.21587	-0.74403	0.22603	1.0009	0.39449	0.15203	0.96354	0.65501	0.87427	0.014798	0.99938	-0.089381	0.96689
kinesin family member 3b	contig06005	0.48462	0.52148	0.71419	0.56968	0.72738	0.25735	0.36043	0.99997	0.97089	0.10254	0.42312	0.69037	1.4082	0.003701	0.23543	0.84523	1.1923	0.049035	0.31094	0.85165	1.1144	0.020384	0.58823	0.60381	0.5399	0.68564	0.53464	0.87519	0.70772	0.55425	0.037674	0.98475
phosphatidylinositol-specific phospholipase	contig06017	-2.4443	0.24461	-0.28865	0.94971	-2.3561	0.21735	-1.1533	0.99416	-2.2499	0.27729	1.5373	0.63459	-2.6397	0.073004	-0.48913	0.87099	-2.7106	0.16727	0.87315	0.80674	-3.0709	0.047887	-1.0695	0.73513	0.27735	0.96571	-1.1811	0.86325	-0.39417	0.96629	-2.1462	0.23876
	contig06025	0.068258	0.92152	0.55412	0.44448	0.38669	0.3356	0.039976	0.99997	0.43594	0.26357	0.31885	0.59097	0.82563	0.0047669	0.41314	0.37688	0.50039	0.21406	0.25555	0.76627	0.87487	0.0031502	0.29923	0.69206	0.11075	0.93617	-0.13355	0.99936	0.17603	0.92768	0.13666	0.86063
fk506-binding protein	contig06031	0.6525	0.20303	0.62633	0.51947	0.89469	0.064605	0.87716	0.38968	1.4892	0.0016152	0.48748	0.50757	1.9249	1.2801e-05	0.71153	0.20123	1.0912	0.02229	0.63536	0.42411	1.5655	0.00020443	0.54716	0.5067	0.2231	0.88437	0.14385	0.99936	0.48136	0.67259	0.69077	0.25948
	contig06032	1.4873	0.022629	0.34673	0.83627	1.0816	0.099812	0.79363	0.82652	2.1566	0.00092046	0.57677	0.58484	2.6738	9.8586e-06	0.77208	0.34608	1.8453	0.0046335	0.72997	0.53163	2.0374	0.00029364	0.59179	0.64238	0.56272	0.70113	-0.020892	0.99936	0.56857	0.75519	0.56123	0.58859
protein lin-52 homolog	contig06037	0.57428	0.032143	0.057282	0.94521	0.13237	0.7051	-0.15807	0.99997	0.41431	0.11808	-0.54491	0.10512	0.72089	0.00096981	-0.31503	0.34935	0.24392	0.48404	-0.31104	0.50896	0.91652	0.00012242	-0.17769	0.77734	-0.30747	0.52035	0.01282	0.99936	-0.2671	0.67196	0.28237	0.46026
	contig06044	0.11792	0.77544	0.19904	0.74871	0.4118	0.13346	0.1039	0.99997	0.38393	0.16199	0.051906	0.93862	0.6487	0.0028636	0.21216	0.59338	0.15995	0.69366	0.032069	0.97704	0.67645	0.0021889	0.10833	0.89356	0.05371	0.965	0.039043	0.99936	0.10322	0.94699	0.43492	0.19195
	contig06046	-0.78468	0.46373	0.065742	0.98583	-0.52542	0.64003	-0.031015	0.99997	-0.71352	0.5154	-0.16774	0.94615	-1.4283	0.0453	0.25973	0.90726	-0.21947	0.8947	-0.5835	0.81822	0.60681	0.49102	-0.31484	0.92724	0.42141	0.88015	0.48681	0.99593	0.10763	0.98777	-0.3172	0.86776
	contig06059	0.363	0.55356	0.33412	0.76882	0.14693	0.8301	0.2829	0.99997	0.52972	0.3094	0.36456	0.65439	0.69809	0.070078	0.097603	0.93132	0.048012	0.96203	0.27957	0.81882	0.8	0.036003	0.45025	0.62355	-0.18136	0.91567	0.096359	0.99936	0.046238	0.98966	-0.21863	0.84417
	contig06083	0.017297	0.97346	-0.010335	0.99004	0.35342	0.17653	-0.26163	0.90937	0.37158	0.147	-0.21773	0.60058	0.93398	3.2582e-05	0.10255	0.83771	0.32201	0.26413	0.078095	0.92987	0.64566	0.0019404	-0.13529	0.84011	-0.023401	0.98542	-0.17544	0.95076	-0.072471	0.96558	0.13168	0.78898
aprataxin and pnkp like factor	contig06086	0.42477	0.48735	0.85633	0.34676	0.0026756	0.99776	0.93448	0.36215	0.21062	0.78018	1.2123	0.050038	0.44142	0.29775	0.99497	0.062295	0.30061	0.68833	0.63592	0.44891	0.92316	0.020361	0.97518	0.14167	-0.13899	0.94248	0.20617	0.99936	-0.028927	0.99467	0.12036	0.92054
small nuclear ribonucleoprotein sm d2	contig06094	1.0009	0.01169	-0.045313	0.97436	0.75525	0.059931	-0.074161	0.99997	0.24264	0.6538	-0.39323	0.52302	0.72355	0.022502	-0.29542	0.62336	-0.029219	0.9729	-0.2923	0.74885	0.86882	0.0065374	-0.24045	0.81008	-0.59634	0.3193	0.19897	0.99573	-0.51924	0.46609	0.32684	0.6137
gtpase-activating protein and vps9 domain-containing protein 1	contig06119	-0.15216	0.92683	0.38594	0.86736	0.62163	0.5523	0.82471	0.93517	1.026	0.26674	0.78851	0.56883	1.3751	0.047067	1.1388	0.27337	1.3331	0.14446	0.95087	0.54353	1.6161	0.01888	0.98613	0.50563	0.75787	0.69363	0.50445	0.97852	0.22676	0.96809	0.67557	0.63847
	contig06126	0.14433	0.76451	0.084539	0.92771	0.31695	0.36942	-0.11916	0.99997	0.47378	0.1366	-0.11681	0.86533	0.6154	0.014755	-0.17263	0.757	0.2625	0.54192	-0.11492	0.9118	0.58416	0.020546	-0.054871	0.96661	0.010767	0.99466	-0.17319	0.98693	-0.037907	0.98777	0.0063254	0.99471
	contig06130	-0.16474	0.78354	0.12815	0.90524	0.26094	0.58318	-0.33622	0.97305	0.42849	0.3124	-0.23431	0.74717	0.94629	0.002584	0.0068477	0.99492	0.53241	0.21523	-0.16859	0.88454	0.89076	0.0045761	-0.043733	0.98068	0.28098	0.77634	-0.37985	0.82692	0.013156	0.99793	-0.20606	0.78417
	contig06133	0.74315	0.020342	0.44372	0.49053	0.59844	0.062936	0.33396	0.90626	0.60397	0.049142	0.27592	0.59738	1.0368	0.00013983	0.50344	0.16604	0.45963	0.18544	0.30845	0.61829	1.0201	0.00024614	0.39043	0.4638	-0.048659	0.97571	0.21664	0.95604	-0.023425	0.99225	0.40736	0.33902
novel protein	contig06136	0.35578	0.2023	0.19191	0.75059	0.49202	0.062034	-0.065002	0.99997	0.35161	0.19342	-0.16869	0.72437	0.48717	0.019521	-0.026218	0.96537	0.0034322	0.99524	-0.098009	0.90768	0.46178	0.026834	0.16612	0.79411	-0.23977	0.67113	-0.019002	0.99936	-0.16981	0.86638	0.20197	0.64468
ccaat-box dna binding protein subunit b	contig06145	1.6192	0.038342	0.5412	0.76967	1.0516	0.19071	0.49558	0.99997	2.0244	0.005875	0.60739	0.64269	2.537	0.00012714	0.67387	0.54284	2.0487	0.0081081	0.65612	0.68648	2.2577	0.00057977	0.64748	0.68496	0.55588	0.77936	0.19518	0.99936	0.79832	0.653	0.25935	0.87894
possible sd repeat-containing cell surface protein precursor	contig06146	0.63157	0.53041	0.27708	0.89872	1.3906	0.08423	0.65727	0.99093	2.3071	0.0028051	0.80025	0.5149	2.796	5.8952e-05	0.44821	0.74672	2.0623	0.0092179	0.85723	0.55846	2.5031	0.0002884	0.64446	0.6984	1.0153	0.44656	0.33761	0.99936	1.2803	0.28764	0.51938	0.71849
predicted protein [Nematostella vectensis]	contig06152	0.76862	0.10197	0.65438	0.41032	0.77208	0.095701	0.20802	0.99997	1.3001	0.0032984	0.85838	0.099176	1.3807	0.00032615	0.65485	0.15938	0.92462	0.04455	0.50142	0.47985	1.4316	0.0003119	0.68195	0.23992	0.43577	0.57627	0.33189	0.91673	0.39412	0.69823	0.53477	0.32408
	contig06163	0.35423	0.44122	0.13109	0.90149	0.67108	0.084564	-0.13162	0.99997	0.2487	0.62873	-0.39932	0.49615	0.47618	0.13024	0.0098812	0.99281	0.30292	0.56917	-0.066313	0.96501	0.83254	0.0071471	-0.22229	0.82223	-0.32365	0.71575	0.21745	0.98179	-0.43844	0.57944	0.29979	0.64157
	contig06172	0.072973	0.94668	-0.23564	0.87371	0.16561	0.83465	-0.59736	0.88953	0.29654	0.70279	-1.5523	0.019518	0.39072	0.41826	-1.2848	0.026623	0.37197	0.64117	-0.62257	0.5267	0.57143	0.2123	-0.79355	0.34272	-0.19276	0.92471	-0.26267	0.99767	0.13717	0.9697	-0.40434	0.66882
ccdc81 protein	contig06190	1.8136	0.010362	0.1411	0.95101	1.6359	0.024613	0.51729	0.99997	1.9525	0.0040598	0.17868	0.91529	2.9483	8.9782e-06	0.32307	0.80984	2.5702	0.00036565	0.010321	0.99677	2.5374	8.1332e-05	0.065755	0.9839	0.50646	0.78089	-0.2865	0.99936	0.19607	0.96616	0.054692	0.98141
kiaa0556 protein	contig06198	0.069126	0.97267	0.67125	0.7452	0.44542	0.70438	-0.31644	0.99997	0.99507	0.37049	-0.56438	0.73148	1.7407	0.015881	0.2469	0.91083	1.36	0.15697	0.0032943	0.99917	1.4414	0.04561	-0.15288	0.97161	0.068965	0.98908	-0.20365	0.99936	-0.21525	0.97087	-0.14596	0.95142
	contig06202	-0.0057034	0.99583	0.069195	0.9602	-0.14268	0.80821	-0.61997	0.63038	-0.08523	0.90474	-0.73872	0.16521	0.094727	0.8192	-0.93301	0.03212	0.1248	0.86797	-0.42152	0.59346	0.31767	0.37365	-0.49196	0.48271	-0.30306	0.77145	-0.51171	0.65315	-0.2831	0.85256	-0.48361	0.39707
	contig06209	0.32088	0.20632	0.33615	0.48421	0.22833	0.39544	0.0097559	0.99997	0.28948	0.25252	-0.007957	0.99041	0.68305	0.00052672	0.05471	0.92011	0.14561	0.68151	0.10938	0.87372	0.50314	0.0083509	0.087202	0.90838	-0.048313	0.96388	0.061168	0.99936	0.015732	0.9933	0.2825	0.38854
annexin b11 isoform a	contig06217	0.43358	0.31585	0.39179	0.62974	0.27707	0.5523	0.35635	0.94665	0.45297	0.27187	0.36503	0.54559	0.99092	0.0015485	0.34965	0.51547	0.22102	0.70711	0.17737	0.87321	0.49846	0.10986	0.28895	0.7323	-0.21151	0.85335	-0.08571	0.99936	-0.16004	0.9432	0.27777	0.67682
	contig06219	0.38386	0.12833	0.0034701	0.99636	0.31211	0.22503	-0.10844	0.99997	0.25274	0.35577	-0.3349	0.3204	0.49633	0.010972	-0.17684	0.63676	0.010461	0.98405	-0.20148	0.69992	0.61919	0.002041	-0.20599	0.68018	-0.4374	0.19317	0.00090797	0.99997	-0.40732	0.25976	0.1417	0.7563
	contig06223	0.4613	0.4801	0.35894	0.77995	0.017879	0.98471	0.20506	0.99997	0.74188	0.17591	0.40884	0.65438	0.52837	0.23754	0.23092	0.82317	0.22529	0.80072	0.3364	0.80037	1.0574	0.013316	0.6585	0.45814	-0.081825	0.9755	0.026186	0.99936	0.031744	0.99435	0.48528	0.55933
protein	contig06235	0.24643	0.79683	0.7145	0.57412	0.095027	0.9224	-0.26855	0.99997	0.81512	0.19487	0.163	0.90906	0.50343	0.3338	1.0666	0.11063	0.41884	0.63162	0.61117	0.59867	1.0382	0.032285	0.030358	0.99176	-0.0090311	0.99667	-0.89347	0.5162	0.16928	0.96616	-0.17657	0.89908
hypothetical protein BRAFLDRAFT_122878 [Branchiostoma floridae]	contig06237	0.42772	0.33556	0.5994	0.43627	0.49967	0.22492	0.31873	0.99093	0.75757	0.043041	0.43253	0.45921	0.87595	0.0052423	0.53337	0.25299	0.02116	0.98	0.3213	0.70125	0.57606	0.06685	0.58777	0.31199	0.14862	0.91567	0.067509	0.99936	0.12827	0.95792	0.40508	0.47633
	contig06238	-0.15581	0.89375	-0.49968	0.77308	0.45805	0.56133	0.58857	0.99093	0.76836	0.26865	0.57547	0.637	1.213	0.019095	0.44674	0.71114	1.1924	0.071698	0.33965	0.87035	0.27231	0.6531	0.31564	0.8812	0.53556	0.72191	0.34093	0.99041	0.54834	0.77385	0.71492	0.43341
bile acid coenzyme a: amino acid n-acyltransferase (glycine n-choloyltransferase)	contig06241	0.83219	0.12506	0.49403	0.6704	0.037254	0.96746	-0.28448	0.99997	1.0246	0.041746	0.325	0.73947	1.3738	0.0013663	0.19717	0.8534	1.0582	0.045042	-0.014087	0.99401	1.2184	0.0042504	0.21302	0.89356	0.64361	0.47929	0.19604	0.99936	0.17011	0.95852	0.20983	0.84846
acyl- thioesterase 1	contig06242	0.5414	0.2436	0.4903	0.5822	0.0003756	0.9994	-0.51567	0.83347	0.63948	0.1366	0.12493	0.89969	1.0144	0.003224	-0.048445	0.96062	0.60635	0.19356	0.22225	0.85063	0.84692	0.013013	0.064688	0.97251	0.37111	0.69881	0.1754	0.99936	-0.021134	0.99604	0.1807	0.83685
	contig06244	0.60757	0.44783	-0.49443	0.74852	1.088	0.1071	-0.042677	0.99997	0.41343	0.64762	0.76468	0.43754	0.7688	0.16222	-0.058897	0.96948	0.49689	0.59764	0.027836	0.9904	1.3631	0.022154	-0.43665	0.78463	-0.088447	0.97966	0.50851	0.93292	0.38853	0.89578	0.016715	0.99348
	contig06256	0.66858	0.068784	-0.052724	0.96684	0.59137	0.10614	0.68363	0.35356	0.91389	0.0077242	0.17974	0.80018	1.2348	8.0352e-05	0.13903	0.84835	0.94678	0.0087199	0.12775	0.91564	1.3338	6.4468e-05	0.20889	0.82255	-0.44133	0.48117	0.0071688	0.99988	-0.27659	0.8213	0.35402	0.5147
	contig06261	0.063851	0.96142	-0.12103	0.95417	-0.3741	0.64739	-0.6499	0.91622	-0.12318	0.91195	-1.0217	0.22927	-0.05896	0.93249	-1.6323	0.015242	0.12701	0.9188	-0.91067	0.37947	0.091094	0.88986	-0.68726	0.54678	-0.45455	0.78324	-0.85637	0.59777	0.0066142	0.99945	-0.9634	0.23521
	contig06285	0.8422	0.068626	0.17104	0.89175	0.56074	0.24647	0.093588	0.99997	0.99159	0.021802	-0.017624	0.98888	1.2262	0.0010324	0.099701	0.92504	0.92898	0.041518	-0.023293	0.98867	1.1246	0.0025474	-0.1527	0.91974	-0.14033	0.93544	-0.13899	0.99936	-0.036427	0.99213	-0.17075	0.86063
superoxide dismutase	contig06289	0.85021	0.065672	-0.057073	0.97226	0.67503	0.14843	-0.13193	0.99997	0.38357	0.48886	-0.58702	0.35762	0.5243	0.16272	-0.54236	0.34517	0.1874	0.80692	-0.40497	0.66732	0.83956	0.02094	-0.23298	0.85176	-0.58491	0.44182	0.18495	0.99936	-0.61184	0.44324	0.35513	0.64157
	contig06295	0.94973	0.031869	0.22448	0.84351	0.52645	0.26255	-0.11899	0.99997	1.1928	0.0044677	-0.12189	0.90504	1.5517	5.4919e-05	0.018245	0.98688	1.0536	0.016028	-0.075499	0.96501	1.4154	0.00022878	-0.050329	0.98029	-0.07661	0.97031	-0.13473	0.99936	0.23124	0.91371	-0.16562	0.86018
	contig06297	0.31696	0.63551	0.30548	0.79944	0.025566	0.9763	-0.27583	0.99997	0.34517	0.59085	0.18592	0.86271	0.81695	0.038663	-0.067813	0.95306	0.32624	0.65033	-0.16229	0.92335	0.46892	0.25703	0.10151	0.95939	-0.39799	0.73244	-0.097763	0.99936	-0.067997	0.9861	0.074221	0.9563
carbonyl reductase	contig06304	1.2052	0.0066748	0.25344	0.81865	0.52685	0.26393	-0.0071384	0.99997	1.3394	0.0019042	-0.25888	0.7553	1.4064	0.00017043	-0.33457	0.61215	0.63595	0.18479	-0.43181	0.61018	1.3531	0.00035991	-0.37372	0.67773	-0.15976	0.92079	-0.28092	0.96604	-0.16602	0.94815	-0.18172	0.84301
carbonyl reductase 1	contig06305	0.78151	0.034402	0.25285	0.77308	0.32748	0.43936	0.16078	0.99997	0.69535	0.048693	-0.18456	0.79746	0.67428	0.021273	-0.11741	0.88169	0.19642	0.7325	-0.33127	0.65986	0.64399	0.027817	-0.2386	0.78674	-0.19314	0.86192	0.022609	0.99936	-0.15403	0.94155	0.075262	0.93449
	contig06307	1.0228	0.019901	0.2255	0.84334	0.17919	0.76585	0.042582	0.99997	0.1843	0.78095	0.16527	0.86247	0.17088	0.68142	0.2007	0.80862	-0.19168	0.79204	0.17931	0.89358	0.11658	0.78591	0.25634	0.81758	-0.10368	0.95461	0.053059	0.99936	-0.43083	0.68385	0.25515	0.75479
	contig06309	-0.54228	0.58529	-0.32498	0.87334	-2.1533	0.0087684	-1.7735	0.16264	-0.49353	0.6252	-0.46925	0.73906	-0.2881	0.69008	-1.4107	0.086229	-0.69118	0.48649	-1.4884	0.15506	-0.32675	0.64395	-0.35092	0.87095	-0.57105	0.75896	-0.070721	0.99936	-1.0762	0.39986	-0.32194	0.83655
zinc finger protein	contig06319	-0.15175	0.82256	0.28534	0.77494	0.11819	0.84475	0.2907	0.99997	0.41524	0.38134	0.23153	0.77088	0.64213	0.055436	0.22285	0.76289	0.49639	0.30492	0.46299	0.53764	0.92815	0.0057054	0.32873	0.71248	0.2177	0.86301	0.5775	0.56636	0.0031271	0.99945	0.73798	0.14185
gtp-gdp dissociation stimulator 1	contig06322	0.43699	0.19554	0.60003	0.2672	0.77489	0.018526	0.57143	0.40259	0.89573	0.0033171	0.62674	0.12022	0.89886	0.00060743	0.66675	0.04732	0.60662	0.058753	0.59192	0.18694	1.0692	0.00015076	0.71008	0.075568	0.32218	0.6051	0.36472	0.71449	-0.16486	0.91638	0.59876	0.11235
	contig06331	1.5246	0.22455	0.33677	0.88043	1.049	0.54142	0.20151	0.99997	1.0938	0.42024	-0.075681	0.97315	2.1756	0.019835	0.22727	0.90183	1.5274	0.24461	-0.25593	0.93884	2.0248	0.030048	-0.33177	0.89356	-0.69056	0.7598	-0.9324	0.72934	-0.080056	0.99122	-0.22636	0.90572
orf2-encoded protein	contig06334	0.36623	0.36642	0.43055	0.55416	0.75892	0.033491	0.11065	0.99997	0.68785	0.04029	0.036042	0.9688	1.2266	6.1917e-05	0.28488	0.5785	0.76601	0.028137	-0.05464	0.96907	1.0544	0.00043647	0.034209	0.98315	0.40281	0.52288	-0.27212	0.92964	0.21711	0.88101	-0.05081	0.95899
	contig06335	0.098209	0.87799	-0.092524	0.93181	0.10507	0.84219	-0.045615	0.99997	0.37625	0.35709	-0.44603	0.38966	0.79198	0.0067169	-0.18841	0.77402	0.31303	0.52261	-0.20892	0.82642	0.73809	0.01146	-0.18937	0.84841	-0.16294	0.89061	-0.26481	0.9419	-0.24583	0.85485	0.2116	0.75622
zinc-binding dehydrogenase family protein	contig06337	0.022013	0.97179	0.35088	0.5822	0.20955	0.57324	0.3282	0.89634	0.50599	0.090616	0.25908	0.60708	0.77889	0.0016755	0.67768	0.034941	0.53358	0.089748	0.61212	0.14357	0.80596	0.0014041	0.49192	0.26194	0.16549	0.85466	0.11095	0.99936	-0.11798	0.94649	0.21952	0.67805
zinc-binding dehydrogenase family protein	contig06338	0.67018	0.19782	0.1533	0.91172	1.0147	0.041126	0.13563	0.99997	1.2767	0.0058534	0.28581	0.75629	1.7732	3.8959e-05	0.54655	0.38647	1.4646	0.0029311	0.47369	0.61573	1.5939	0.00020343	0.40258	0.69057	0.66175	0.40257	0.26809	0.98597	0.4211	0.76208	0.34229	0.68914
receptor-type tyrosine-protein phosphatase partial	contig06343	0.21467	0.48797	0.21717	0.70536	0.16679	0.59046	0.052748	0.99997	0.076118	0.85233	0.12234	0.80631	0.30658	0.13792	0.1853	0.62909	0.12959	0.74691	0.21443	0.68549	0.51594	0.010691	0.26321	0.56365	-0.48213	0.15488	0.13574	0.98795	-0.4121	0.27482	0.30796	0.3692
	contig06346	-0.058929	0.93113	0.1362	0.88982	0.28617	0.49587	-0.28946	0.99093	-0.095391	0.87218	-0.1979	0.77036	0.61192	0.030865	-0.062044	0.94179	0.049734	0.94443	-0.15581	0.8817	0.63157	0.025646	-0.1739	0.86168	0.064217	0.96844	-0.23322	0.96106	0.23822	0.85568	-0.050666	0.9596
	contig06349	0.42898	0.058573	0.20145	0.68629	0.23771	0.33531	0.15345	0.99997	0.35095	0.11451	0.17497	0.64431	0.52792	0.0034318	0.10994	0.78983	0.31363	0.20141	0.17177	0.73044	0.66534	0.00048027	0.3005	0.40245	-0.35329	0.27834	0.24664	0.74717	-0.38775	0.22862	0.39869	0.13859
cd109 antigen	contig06356	0.30293	0.39443	-0.013341	0.98972	0.39357	0.21967	-0.36284	0.84265	0.090586	0.85579	-0.22551	0.67063	0.48069	0.050084	-0.051109	0.94413	-0.043282	0.94364	-0.22176	0.75283	0.50763	0.037349	-0.059505	0.96163	-0.45238	0.32811	-0.021008	0.99936	-0.079462	0.96809	0.15538	0.79417
	contig06364	0.03417	0.96939	0.51082	0.57463	0.59808	0.18501	0.58301	0.75509	0.26616	0.65368	0.57954	0.33823	0.70283	0.044277	0.65282	0.19403	0.36853	0.53046	0.57765	0.423	0.88599	0.011075	0.40437	0.63177	0.26165	0.83673	0.045893	0.99936	-0.32752	0.8238	0.28293	0.7203
peroxisomal trans-2-enoyl- reductase	contig06370	0.799	0.09999	0.059744	0.97457	0.67572	0.1655	0.17473	0.99997	0.91301	0.044119	0.062095	0.96424	0.39045	0.3356	-0.33941	0.69441	0.40705	0.52089	-0.4565	0.67792	0.80164	0.033847	-0.044587	0.98492	0.12884	0.94365	0.00011339	0.99997	0.030527	0.99386	0.27193	0.75912
peroxisomal trans-2-enoyl- reductase	contig06371	0.75702	0.031468	0.39645	0.58779	0.57697	0.10237	0.35122	0.91928	0.4525	0.21605	0.033217	0.97195	0.87165	0.0021199	0.046261	0.95457	0.21955	0.67138	0.27364	0.72144	0.93638	0.0012577	0.22398	0.79173	-0.26241	0.76063	0.058144	0.99936	-0.36974	0.63611	0.17986	0.79152
	contig06376	0.6028	0.39076	-0.1541	0.9314	1.3056	0.033306	0.24629	0.99997	1.0428	0.075741	-0.35796	0.75199	1.3053	0.0068799	0.27488	0.80984	1.0033	0.10977	-0.37695	0.80132	1.2191	0.01155	-0.469	0.7176	0.68424	0.5308	-0.43394	0.94464	0.61965	0.65409	0.10967	0.94514
mucin-associated surface protein	contig06379	0.1918	0.719	0.10627	0.91952	0.54948	0.14217	-0.093941	0.99997	0.42173	0.28516	0.2534	0.69673	0.86565	0.003368	0.093094	0.90981	0.02116	0.97872	0.034378	0.98071	0.9356	0.0019044	-0.0222	0.99024	-0.14824	0.90852	0.14351	0.99936	-0.16471	0.93514	0.15838	0.83236
egf-like domain-containing protein	contig06395	0.46738	0.29233	0.19744	0.84914	0.47848	0.26107	-0.28498	0.99997	0.71028	0.065756	-0.12745	0.8885	1.12	0.00066965	0.16683	0.83075	1.044	0.0086943	0.062519	0.96888	1.0215	0.0018657	0.079457	0.96097	0.41798	0.58716	-0.29837	0.93583	0.2723	0.85256	-0.15847	0.84913
	contig06421	0.34842	0.23567	0.28449	0.61986	0.3357	0.24333	0.11039	0.99997	0.46282	0.080916	0.14556	0.78041	0.75165	0.00077151	0.39629	0.20923	0.26939	0.43219	0.075993	0.93856	0.64901	0.0032639	0.23492	0.66818	-0.051708	0.96674	0.045587	0.99936	0.18019	0.85809	0.48814	0.13398
zinc dhhc-type containing 2	contig06427	0.31032	0.52427	0.37284	0.65708	0.46291	0.26364	0.33063	0.97969	0.64914	0.087259	0.55641	0.28912	1.0985	0.00060554	0.4887	0.30382	0.33602	0.51596	0.38265	0.60673	1.0159	0.0015235	0.49118	0.43753	0.021526	0.99188	0.49506	0.62927	-0.15842	0.94375	0.7762	0.085378
pterin-4-alpha-carbinolamine dehydratase 2	contig06439	-0.10089	0.89119	0.28126	0.7748	0.13663	0.8155	-0.21954	0.99997	0.26384	0.63098	-0.6954	0.19364	0.77657	0.017684	-0.4891	0.34413	1.2043	0.0035269	-0.14335	0.91706	0.66617	0.042255	-0.31772	0.71885	0.30673	0.76164	-0.77651	0.27833	0.27589	0.85552	-0.9455	0.044464
phosphatidylinositol glycan anchor class m	contig06455	0.8411	0.042905	0.46229	0.59107	0.57479	0.17616	0.0040078	0.99997	0.88258	0.023883	0.49704	0.3978	1.5799	2.0754e-05	0.15804	0.84835	0.62237	0.15659	0.28221	0.7755	1.1542	0.00083268	0.17812	0.88253	-0.045842	0.9821	0.010053	0.99954	-0.023835	0.99467	0.10469	0.91538
	contig06476	2.9272	0.015253	0.93991	0.73669	2.348	0.053972	0.99967	0.98796	3.6516	0.001928	0.82218	0.70266	4.6822	1.8059e-05	0.87793	0.63347	3.5332	0.0035488	0.90653	0.73859	4.007	0.00017166	0.65774	0.83397	1.9528	0.26166	0.55174	0.99869	2.1448	0.21256	0.77302	0.72387
tripartite motif protein 2-like	contig06489	1.4652	0.093398	0.24359	0.92061	0.93014	0.25023	0.85863	0.91622	0.4156	0.73498	0.35292	0.84161	1.577	0.0098004	0.51411	0.71793	0.52792	0.62855	-0.63223	0.74269	0.20248	0.8098	0.71771	0.67921	0.27252	0.92285	0.45343	0.97729	0.94379	0.50522	0.13191	0.94746
bed finger protein 4	contig06500	-1.1344	0.13188	1.2101	0.37471	0.34957	0.75292	1.0425	0.67598	0.035712	0.98048	1.7692	0.05023	0.32907	0.62854	1.6376	0.033184	0.14322	0.91913	1.3402	0.27967	-0.0397	0.9594	1.2009	0.24652	0.92052	0.45386	0.21216	0.99936	0.32257	0.93546	0.071232	0.9748
	contig06506	0.86929	0.042839	0.14196	0.90418	0.61525	0.15916	-0.13761	0.99997	0.58243	0.18264	0.0073901	0.99491	0.69552	0.04118	-0.10096	0.91664	0.4904	0.32778	-0.06542	0.96967	0.80328	0.017937	-0.024121	0.99064	0.02265	0.99196	0.13964	0.99936	0.31405	0.83087	0.58246	0.29209
	contig06526	0.34572	0.70016	-0.25866	0.88015	0.23403	0.78909	-0.32404	0.99997	0.25154	0.79183	-0.31289	0.80002	1.6068	0.0016837	-0.12946	0.93071	-0.29206	0.77722	-0.26442	0.89088	0.47089	0.38706	-0.50492	0.70318	-0.40087	0.82092	-0.41044	0.96257	-0.5834	0.7183	0.042037	0.98314
endonucleasereverse transcriptase	contig06541	0.33704	0.17784	0.21136	0.68985	0.39735	0.096967	0.048086	0.99997	0.39635	0.087777	0.024529	0.96861	0.70047	0.0003872	0.27291	0.36671	0.13861	0.70029	0.049652	0.95789	0.75395	0.00025576	0.21948	0.63185	0.030072	0.98009	0.22568	0.84284	0.04439	0.97864	0.54903	0.043024
	contig06544	0.16056	0.86852	0.21424	0.89099	0.8124	0.16175	0.53709	0.9363	1.4321	0.00739	0.58509	0.49631	1.6854	0.00034567	0.5589	0.46716	1.2912	0.021252	0.77034	0.40478	1.6046	0.0007273	0.52193	0.63307	1.368	0.053014	0.229	0.99936	0.92206	0.27399	0.36541	0.72139
leucine-rich transmembrane	contig06550	0.7682	0.626	0.91417	0.59849	1.5619	0.23384	1.3021	0.58856	2.2893	0.041608	1.2178	0.27491	2.45	0.0091012	1.3969	0.1303	2.2736	0.055148	1.2158	0.35659	2.1375	0.022397	1.2588	0.30305	0.65125	0.74178	0.28763	0.99936	1.0882	0.55313	0.45088	0.77714
	contig06554	0.9685	0.17025	0.3117	0.86082	0.53724	0.49965	0.49091	0.99884	0.011715	0.99342	0.75274	0.45065	1.3132	0.014154	0.38122	0.74292	0.71744	0.3794	0.0014384	0.99917	0.56732	0.31991	0.42628	0.79391	1.1339	0.23207	0.55053	0.9126	0.61351	0.72748	0.43849	0.71769
	contig06569	0.73496	0.29016	0.35771	0.81935	0.18907	0.83323	-0.12285	0.99997	1.6047	0.0066221	-0.27532	0.8271	1.9424	0.00022532	-0.35932	0.73815	1.0704	0.097323	-0.32198	0.85165	1.7565	0.00080575	-0.20043	0.92579	0.29367	0.88197	-0.72775	0.70221	0.74451	0.54102	-0.30895	0.80112
	contig06574	0.70512	0.12978	0.80962	0.30961	0.63949	0.16823	0.20798	0.99997	0.25575	0.68276	-0.22457	0.79928	0.67908	0.061198	0.068162	0.94927	0.61771	0.21523	0.24611	0.83816	0.78836	0.028278	0.19603	0.88157	-0.20037	0.89146	0.13303	0.99936	-0.17173	0.94703	0.33366	0.66465
poly binding protein 2	contig06577	0.6056	0.12561	0.39326	0.62749	0.41226	0.32721	0.10043	0.99997	0.69846	0.059487	0.14467	0.86247	1.1493	0.00033365	-0.023174	0.97924	0.74552	0.05376	-0.14425	0.90712	1.0128	0.0014135	0.084499	0.95559	0.4194	0.55735	0.11909	0.99936	0.17855	0.93071	0.032823	0.9779
bestrophin-1-like isoform 1	contig06580	0.63649	0.56704	-0.4914	0.81967	0.30689	0.79955	-0.88116	0.91154	1.4464	0.085473	-1.051	0.38949	2.1008	0.0025069	-0.70801	0.57241	1.5317	0.082819	-0.7106	0.69867	1.6107	0.018794	-0.95658	0.52013	0.12921	0.9762	-0.95392	0.74101	0.0041115	0.99945	-1.1983	0.27865
solute carrier family 37 (glucose-6-phosphate transporter) member 4	contig06593	-0.9257	0.058852	0.081717	0.95984	-0.84785	0.082413	0.062872	0.99997	-1.4304	0.0023309	0.31873	0.71491	-1.4298	0.00038573	0.38454	0.58898	-1.2963	0.0074382	0.47742	0.60673	-1.3937	0.00063926	0.40166	0.68655	-0.456	0.65579	0.24792	0.99352	-0.36265	0.82419	0.48657	0.49636
	contig06607	-0.53499	0.55444	-0.30264	0.87328	0.86186	0.24993	0.45308	0.99997	1.552	0.020199	0.71814	0.50428	1.7277	0.0024522	-0.55407	0.59481	1.4095	0.046452	0.42707	0.80981	1.5884	0.0052406	0.40789	0.82125	1.8666	0.033331	0.57708	0.91302	1.7926	0.034025	0.65547	0.54566
	contig06615	0.41129	0.61583	0.27872	0.86477	1.1208	0.06918	0.58538	0.93577	0.78952	0.21905	0.2763	0.82217	0.68171	0.17879	0.79172	0.28833	0.78753	0.25712	0.20977	0.91858	1.096	0.025037	0.48102	0.71367	0.11097	0.96844	0.78703	0.62615	-0.35602	0.89674	0.82112	0.30691
	contig06621	0.51905	0.21673	0.4001	0.62886	0.26082	0.5872	0.39492	0.9165	0.5208	0.20073	0.37663	0.53915	0.65135	0.037847	0.30786	0.59497	0.40488	0.40499	0.40533	0.58332	0.91662	0.0039178	0.36002	0.63605	-0.51651	0.41929	0.24161	0.97131	-0.51676	0.45788	0.6647	0.16474
protein psr	contig06622	-0.9733	0.36215	-0.86241	0.67453	-0.52387	0.65877	0.07135	0.99997	-0.70553	0.54574	-0.73422	0.63785	-1.6479	0.025994	-0.13451	0.95098	-0.69922	0.59163	-0.29949	0.92554	-1.4232	0.055544	-0.37692	0.89356	-0.26291	0.9413	0.41212	0.99936	-0.90829	0.68658	-0.2521	0.90735
	contig06638	1.2899	0.0070469	0.094774	0.95101	0.68433	0.16283	0.0038959	0.99997	1.2122	0.0072113	-0.28841	0.74581	1.6233	8.0841e-05	-0.24401	0.77644	1.0053	0.034272	-0.14918	0.92839	1.5882	0.00016722	-0.13522	0.93831	0.041651	0.98642	-0.18071	0.99936	0.72437	0.3352	0.28837	0.74343
tripartite motif protein 2-like	contig06640	0.62164	0.22254	0.0075923	0.9961	0.23629	0.70384	0.35814	0.99779	1.0096	0.024713	0.43538	0.5656	0.97474	0.0099825	0.51057	0.40974	0.87166	0.071351	0.40713	0.67954	1.3664	0.00063559	0.5447	0.5037	-0.23968	0.87119	0.22029	0.99831	0.12216	0.96836	0.57008	0.37948
tripartite motif protein 2-like	contig06642	0.79374	0.11195	0.10914	0.94144	0.43261	0.44119	0.35977	0.99779	0.77556	0.10687	0.14408	0.898	0.88012	0.023353	0.14735	0.88984	0.71566	0.17234	0.38295	0.71889	1.1699	0.003105	0.36781	0.72915	-0.38881	0.73568	0.24828	0.99405	-0.209	0.93796	0.55792	0.40827
	contig06652	0.6102	0.55558	0.97518	0.51481	0.028674	0.98213	1.3452	0.39167	1.403	0.047971	1.1201	0.25532	1.5611	0.0082256	0.71635	0.47673	1.39	0.063444	0.47303	0.79413	1.7335	0.0038619	1.1405	0.28829	0.13389	0.96388	-0.1033	0.99936	-0.17814	0.9667	0.41901	0.72646
	contig06653	0.67505	0.14572	0.26198	0.81347	0.34374	0.51915	0.23247	0.99997	1.1754	0.0054879	0.32337	0.6777	1.4466	0.00014203	0.078443	0.9413	1.0763	0.015278	0.27977	0.80049	1.3532	0.00039872	0.14139	0.92762	0.0045219	0.9975	-0.19655	0.99936	-0.10331	0.97192	0.095484	0.93145
	contig06668	-0.8869	0.018895	0.015953	0.98973	-0.46097	0.24953	-0.43109	0.86018	-0.67976	0.062329	-0.57669	0.25147	-0.21745	0.52357	-0.86286	0.02934	-0.51846	0.21233	-0.5455	0.36513	-0.37285	0.23656	-0.47388	0.44226	-0.5864	0.28983	-0.24869	0.95964	-0.76661	0.12547	-0.18139	0.8082
clathrin heavy chain 1	contig06671	0.45818	0.2088	0.31995	0.67057	0.56044	0.1039	0.2287	0.99997	0.48123	0.1671	-0.32474	0.54435	0.9113	0.0010996	0.020437	0.9795	0.61402	0.079038	0.032076	0.98064	0.82035	0.0031068	-0.029755	0.98441	0.14811	0.8962	-0.20491	0.9763	0.25278	0.82925	-0.13641	0.8479
orf2-encoded protein	contig06675	0.35976	0.18082	0.43798	0.34503	0.5106	0.047503	0.1547	0.99997	0.372	0.14827	0.35862	0.30149	0.70138	0.0007997	0.34465	0.25667	0.49573	0.05315	0.5882	0.081812	0.67439	0.0013661	0.4029	0.27351	-0.32578	0.4426	0.024029	0.99936	-0.1168	0.93181	0.28817	0.41772
	contig06703	1.443	0.10205	-0.39809	0.86163	1.0405	0.32357	0.12269	0.99997	1.4311	0.090232	0.66615	0.64835	1.4441	0.036119	-0.20078	0.91888	1.1787	0.21635	-0.36654	0.88786	1.4106	0.040304	0.023983	0.99548	1.5537	0.18767	-0.00035168	0.99997	0.33685	0.94649	0.40824	0.8122
superoxide dismutase	contig06719	0.65573	0.4889	1.1804	0.43876	-0.19225	0.86743	0.27037	0.99997	0.87054	0.29862	0.29417	0.86091	1.6085	0.0091749	0.54041	0.65443	1.5831	0.040247	0.94652	0.47876	1.127	0.06953	0.93848	0.46745	1.1683	0.31224	0.15939	0.99936	1.4955	0.15304	0.64381	0.60829
PREDICTED: hypothetical protein [Hydra magnipapillata]	contig06742	0.77051	0.1022	-0.30228	0.78654	0.70092	0.1352	-0.40272	0.97019	0.66759	0.15297	-0.399	0.5958	0.86682	0.018196	-0.625	0.2552	0.32751	0.61763	-0.69252	0.34038	0.77775	0.034228	-0.52813	0.50439	-0.70265	0.30681	-0.26118	0.98134	-0.028896	0.99396	-0.098302	0.93145
	contig06760	1.037	0.25412	0.58914	0.76498	0.47015	0.69903	0.36532	0.99997	1.0781	0.21497	0.64735	0.64567	1.5109	0.022856	0.94092	0.37766	0.60999	0.60457	0.74044	0.66579	1.5422	0.020086	0.88049	0.55199	0.23756	0.94071	0.10041	0.99936	-0.11205	0.9861	0.62586	0.65718
	contig06761	0.36447	0.41452	1.0546	0.050774	-0.11362	0.83522	0.71244	0.35522	0.56222	0.14153	1.012	0.029066	0.62474	0.039693	0.95045	0.01651	0.2634	0.62859	0.71419	0.18022	0.72637	0.0164	0.84895	0.075568	0.070508	0.96756	0.23058	0.97404	-0.50337	0.45344	0.5131	0.30008
	contig06772	1.2272	0.15549	0.20808	0.93225	0.79859	0.44457	-0.4129	0.99997	0.19242	0.8907	0.55746	0.70703	0.43908	0.55945	0.25266	0.88802	0.46652	0.7126	0.037369	0.98963	1.4782	0.041176	0.37962	0.87103	0.32324	0.91055	-0.17526	0.99936	-0.20893	0.96938	0.12602	0.94828
	contig06778	0.46864	0.26397	0.18017	0.85829	0.98522	0.013985	0.2509	0.99997	1.0082	0.005386	0.57375	0.26202	1.3428	5.7223e-05	0.6119	0.15713	1.0375	0.0066101	0.29109	0.73281	1.5109	3.0504e-05	0.47827	0.44463	0.60501	0.27571	0.49685	0.61231	0.17281	0.93427	0.70709	0.11903
orf2-encoded protein	contig06784	0.3016	0.31328	0.012258	0.9884	0.16081	0.63226	0.01436	0.99997	0.29787	0.30393	0.12279	0.81727	0.55212	0.0094929	0.46544	0.11285	0.17931	0.6426	0.22258	0.69466	0.44438	0.036708	0.18485	0.76255	-0.30695	0.52119	0.11352	0.99936	-0.26135	0.68547	0.29639	0.4276
	contig06785	0.63719	0.033196	0.14999	0.84544	0.3564	0.26157	0.029106	0.99997	0.61022	0.031196	0.12169	0.84486	0.82621	0.0007441	0.2219	0.62148	0.59477	0.046349	0.34121	0.51935	0.97143	0.00020081	0.27757	0.62884	-0.41432	0.3799	-0.046601	0.99936	-0.448	0.34305	0.25078	0.60201
	contig06819	-0.019799	0.9865	1.3007	0.12537	0.090142	0.91553	0.95919	0.41841	0.10975	0.90586	1.0788	0.11542	0.43386	0.35029	1.3443	0.017468	0.10828	0.91786	1.0508	0.15984	0.40844	0.38106	1.1267	0.10425	0.013253	0.99568	0.01311	0.99954	0.066285	0.98777	0.21533	0.84846
	contig06822	0.62179	0.034794	0.14378	0.85054	0.70015	0.020664	-0.064098	0.99997	0.43366	0.1416	-0.096733	0.88378	0.86451	0.00038952	-0.034104	0.95947	0.37295	0.26233	-0.016662	0.98754	0.95283	0.00020522	0.00063294	0.99937	-0.18959	0.81573	0.012318	0.99936	-0.16137	0.9065	0.19948	0.70098
	contig06848	0.29591	0.33206	0.36237	0.5066	0.23882	0.44205	0.2636	0.92864	0.29042	0.32753	0.1963	0.67451	0.58898	0.0062498	0.43175	0.15602	0.15525	0.70532	0.15646	0.82068	0.56101	0.0092383	0.28615	0.54814	-0.022007	0.98827	-0.059783	0.99936	-0.10124	0.94813	0.30879	0.40781
	contig06865	1.2056	0.0033431	0.32743	0.72437	1.1902	0.0072462	0.13818	0.99997	0.80338	0.036769	-0.010075	0.99371	1.3286	0.00011854	0.074639	0.93855	0.6762	0.1066	0.097216	0.94942	1.2737	0.00027599	0.25825	0.79173	-0.075316	0.96739	0.30609	0.93359	-0.24914	0.88122	0.21108	0.78762
	contig06904	0.28728	0.24748	0.25193	0.59849	0.44015	0.055941	-0.10835	0.99997	0.32681	0.15917	-0.10588	0.81629	0.68373	0.00033385	0.13597	0.72318	0.22165	0.44458	0.01418	0.98705	0.6566	0.00064734	-0.004401	0.99676	0.021831	0.98493	0.016036	0.99936	0.11763	0.91794	0.239	0.46875
endonuclease-reverse transcriptase	contig06910	0.4227	0.11374	0.067985	0.92883	0.44365	0.091803	0.16414	0.99997	0.62517	0.01105	0.035203	0.95871	0.89169	7.6319e-05	0.28652	0.39586	0.55487	0.032182	0.18933	0.752	0.84468	0.00021098	0.28077	0.54044	0.07475	0.94035	0.053397	0.99936	0.10468	0.94375	0.20922	0.62488
iodotyrosine deiodinase	contig06937	0.50347	0.20477	0.53944	0.46513	0.65484	0.080812	0.051302	0.99997	0.53217	0.16001	-0.043282	0.96475	1.1278	0.00029595	0.28632	0.60623	0.67888	0.074236	0.41378	0.53762	1.1481	0.00033691	0.30134	0.69751	0.26733	0.77781	0.093781	0.99936	0.41524	0.59489	0.064091	0.9478
	contig06950	0.24761	0.75094	0.27014	0.84032	0.41602	0.49732	0.27226	0.99997	0.46398	0.44924	0.7463	0.28655	0.82102	0.047902	0.44661	0.54662	0.61815	0.30267	0.72497	0.38352	1.2901	0.0023225	0.57629	0.51925	0.40999	0.74019	0.20308	0.99936	-0.23843	0.93181	0.44287	0.59265
	contig06968	-0.31387	0.50861	0.3493	0.67954	0.40131	0.34096	-0.1265	0.99997	0.5587	0.14792	-0.15018	0.85371	0.9741	0.0016939	0.10993	0.89719	0.59818	0.13842	0.14145	0.90893	0.81929	0.0075181	0.16057	0.88799	0.76187	0.13499	-0.36041	0.84832	0.22577	0.8914	-0.13655	0.86776
	contig06997	0.20767	0.58084	0.36137	0.54018	0.43273	0.14089	0.22465	0.99651	0.43532	0.1317	0.35671	0.38119	0.86564	0.00032104	0.52957	0.090777	0.5857	0.041691	0.64922	0.093835	0.67361	0.0038933	0.53068	0.17376	0.011261	0.99466	0.42741	0.50733	-0.22952	0.80513	0.51959	0.13195
	contig07003	-0.15513	0.88847	0.367	0.8118	0.97509	0.12028	0.3045	0.99997	0.31735	0.7191	0.56695	0.56692	0.58287	0.26307	0.6906	0.38742	0.45349	0.60483	0.34369	0.83505	1.0262	0.037569	0.53645	0.66658	0.2214	0.92318	0.45953	0.93674	-0.031548	0.99566	0.83241	0.30249
orf2-encoded protein	contig07013	0.1017	0.802	0.26366	0.62498	0.36456	0.16588	0.048026	0.99997	0.39814	0.11741	0.067826	0.91021	0.50882	0.012611	0.025351	0.96557	0.41796	0.1173	-0.025354	0.98008	0.74393	0.00058316	0.17584	0.76514	-0.12801	0.87298	-0.060198	0.99936	-0.11327	0.93546	0.32057	0.35088
	contig07037	0.6779	0.18813	0.14308	0.91812	0.29525	0.62887	-0.38098	0.99651	0.86816	0.065058	-0.079978	0.94777	1.4887	0.00026556	-0.81431	0.13317	0.75916	0.13965	-0.23358	0.86502	1.4406	0.0004881	-0.31974	0.78152	0.1288	0.94556	-0.35846	0.93873	0.05108	0.98889	-0.19866	0.84443
	contig07047	1.5736	0.015014	0.62087	0.65823	0.64785	0.36923	0.74732	0.85345	1.6575	0.0066778	0.45449	0.68961	1.7251	0.0011081	0.3146	0.793	1.4359	0.025404	0.74118	0.51957	1.4696	0.0048983	0.83912	0.42437	0.39586	0.8325	0.48163	0.93668	0.43783	0.85419	0.9767	0.22935
	contig07087	0.12617	0.74467	-0.02158	0.98107	0.12019	0.72895	-0.19375	0.99779	0.10477	0.78913	-0.36214	0.30585	0.57885	0.0052602	-0.42465	0.14304	0.14728	0.71034	-0.25957	0.59919	0.56374	0.006689	-0.25507	0.59713	-0.31192	0.48837	-0.32076	0.65243	-0.062795	0.97068	-0.15078	0.75441
cd63 antigen	contig07191	2.5528	0.015879	0.22792	0.90548	1.8272	0.084539	0.074654	0.99997	1.6896	0.10198	0.19992	0.90103	2.3369	0.0035889	-0.016755	0.99295	0.86662	0.50538	0.26241	0.90658	2.5741	0.0028379	0.36743	0.84211	-1.4592	0.3291	-0.095211	0.99936	0.00040852	0.99999	0.063189	0.9764
ankyrin repeat and mynd domain-containing protein 2	contig07192	-0.56161	0.39852	0.53488	0.6704	-1.2037	0.037493	0.25413	0.99997	-0.13406	0.89001	0.81477	0.2927	-0.10193	0.86159	-0.278	0.79228	0.82246	0.18373	0.35054	0.80506	0.25645	0.62752	0.24504	0.88335	0.35224	0.82904	-0.18415	0.99936	0.30055	0.91356	-0.073497	0.96439
ankyrin repeat and mynd domain-containing protein 2	contig07194	0.77057	0.065284	0.15199	0.89255	0.48264	0.27611	-0.071803	0.99997	0.56282	0.18481	0.27468	0.7122	0.8585	0.0091954	-0.31921	0.60329	0.41238	0.42713	-0.12679	0.92999	0.66493	0.043779	-0.14627	0.91286	-0.26459	0.81809	-0.13678	0.99936	-0.15752	0.94699	0.25148	0.74009
cell division protein	contig07198	0.1663	0.77065	0.34275	0.67902	0.6894	0.067051	0.11358	0.99997	0.26173	0.59026	0.21647	0.75938	0.75902	0.010937	0.51031	0.25195	0.23095	0.67786	-0.05256	0.97356	0.6524	0.028542	0.37407	0.58815	0.075662	0.96421	0.25417	0.95586	0.11835	0.95992	0.47602	0.3398
	contig07200	0.22888	0.60639	0.35459	0.61576	0.50301	0.1415	0.1201	0.99997	0.24914	0.5582	0.24202	0.67922	0.82764	0.0022817	0.33696	0.45546	0.1883	0.71485	0.21526	0.79413	0.8106	0.0029605	0.27086	0.6983	-0.047226	0.97815	0.25007	0.93583	0.13981	0.9429	0.38871	0.40135
pedal peptide 3	contig07201	-0.13401	0.84739	-0.34094	0.72015	-0.09618	0.8778	-0.63946	0.60902	-0.38808	0.42313	-1.4278	0.0029749	-0.20566	0.59143	-1.4157	0.0011889	0.12175	0.8715	-0.90386	0.10901	0.039706	0.92795	-0.8709	0.10169	-0.27195	0.81347	-0.35225	0.89758	0.39815	0.69969	-0.50418	0.37239
pedal peptide 3	contig07203	1.0204	0.15671	-0.29973	0.87128	0.42384	0.62298	-0.33972	0.99997	1.3913	0.03393	-1.0336	0.26345	1.782	0.0014958	-1.109	0.15493	0.96521	0.20135	-1.1373	0.27746	1.397	0.011267	-0.84012	0.46541	-0.60161	0.69627	-1.1371	0.40373	0.18481	0.96713	-0.84904	0.36231
matrix metallopeptidase 24	contig07206	-0.044944	0.97827	0.18263	0.93815	0.68894	0.44727	-0.012448	0.99997	1.2979	0.09096	-0.30535	0.85575	1.7814	0.0045932	-0.24883	0.88304	1.3786	0.087213	-0.046103	0.98736	1.4238	0.022515	-0.087193	0.98113	0.24916	0.93333	-0.14998	0.99936	0.47777	0.8842	-0.0091649	0.99702
cytidylate kinase	contig07209	1.2795	0.24787	-0.24756	0.92645	0.91052	0.43685	-0.38673	0.99997	0.88182	0.4704	0.57079	0.73306	1.7491	0.03145	-0.33342	0.87769	1.1947	0.31451	-0.44859	0.86031	2.3311	0.0046823	-0.66253	0.74423	0.50511	0.8512	0.8584	0.84828	0.41423	0.93243	0.13767	0.95556
	contig07210	0.10152	0.87266	0.38901	0.61346	0.53807	0.15064	0.36099	0.92396	0.14289	0.79786	0.38857	0.48256	0.74614	0.01058	0.76949	0.046797	0.1303	0.83829	0.33257	0.65613	0.79407	0.0068811	0.49478	0.39653	0.032219	0.98641	0.50145	0.57566	0.026651	0.99234	0.62434	0.16128
	contig07212	0.22792	0.6319	0.39815	0.58827	0.53843	0.13286	0.17214	0.99997	0.1426	0.78899	0.2063	0.75513	0.79818	0.0046875	0.46709	0.26919	0.11054	0.86113	0.26275	0.74041	0.8018	0.004795	0.27525	0.71434	0.09425	0.94423	0.32603	0.85819	0.067997	0.97737	0.4146	0.39207
mps one binder kinase activator-like 2b	contig07213	0.12311	0.83701	0.32562	0.68583	0.32721	0.43081	-0.12958	0.99997	0.6484	0.063893	-0.060354	0.94682	1.0452	0.00048837	0.12584	0.86715	0.48501	0.22902	-0.0020817	0.99853	1.0506	0.00058858	-0.084174	0.95258	0.077118	0.96105	-0.31279	0.88987	0.082059	0.97192	0.020838	0.98558
	contig07215	0.27904	0.44698	0.24638	0.72734	0.3043	0.37459	-0.089721	0.99997	0.47101	0.12365	-0.015806	0.98481	0.82917	0.00096838	0.098636	0.88056	0.32721	0.38044	-0.026255	0.98365	0.8326	0.0010961	0.040285	0.97654	-0.051754	0.9718	-0.2076	0.95666	0.047257	0.98254	0.17617	0.75912
cytochrome p450	contig07222	0.43122	0.30116	0.42265	0.58843	0.57192	0.13286	0.27234	0.99997	0.88672	0.011942	-0.078343	0.93065	1.3899	2.9236e-05	0.19254	0.7745	0.88838	0.016726	0.15024	0.89676	1.329	8.6479e-05	0.12277	0.9218	0.56867	0.30758	-0.23673	0.96632	-0.068704	0.97882	0.038265	0.9737
	contig07225	0.25763	0.49194	0.046649	0.96576	0.42442	0.17739	-0.22788	0.99779	0.13375	0.76916	-0.68689	0.074857	0.44472	0.07068	-0.38833	0.29759	0.23201	0.58779	-0.31787	0.57902	0.58311	0.016602	-0.20908	0.76674	-0.34867	0.52574	-0.055572	0.99936	-0.091324	0.96379	-0.081642	0.90911
	contig07227	0.39154	0.33556	0.14161	0.88509	0.46083	0.22046	-0.17536	0.99997	0.25182	0.58811	-0.6522	0.15424	0.78461	0.0062125	-0.56734	0.16273	0.41847	0.31849	-0.33861	0.63437	0.73896	0.0099493	-0.29256	0.69396	-0.27292	0.7533	-0.56339	0.4481	0.093384	0.96809	-0.21901	0.73897
	contig07231	0.72732	0.11711	-0.1989	0.86948	0.6031	0.19886	0.17407	0.99997	0.9925	0.020367	0.38243	0.60844	1.102	0.0025469	0.0032084	0.99874	0.53325	0.31075	0.19197	0.88805	0.87826	0.01483	0.16323	0.91015	0.12184	0.9441	-0.14251	0.99936	0.069649	0.98254	0.17511	0.85495
microtubule-associated protein	contig07244	1.5792	0.17697	-0.44679	0.90939	0.68647	0.65671	-0.14974	0.99997	1.0387	0.47688	0.23165	0.94712	1.3354	0.14042	-0.70861	0.79783	1.21	0.36354	0.37499	0.94161	2.198	0.013386	-0.51757	0.90675	-0.097856	0.98423	-0.046283	0.99936	-0.027029	0.99854	0.34517	0.87108
myosin light chain kinase	contig07248	1.5546	0.042127	0.29554	0.88714	0.62292	0.48552	0.37247	0.99997	1.6132	0.024957	0.11788	0.95135	2.0419	0.0010151	0.17909	0.9171	1.3545	0.081767	0.26938	0.91475	1.9201	0.002045	0.35826	0.86615	0.27161	0.92318	-0.067749	0.99936	1.0647	0.40639	0.58272	0.64782
ppig protein	contig07249	0.27301	0.47125	0.4688	0.44967	0.25604	0.48663	0.23446	0.99779	0.4847	0.11911	0.73669	0.05682	0.72502	0.0039196	0.84687	0.0093697	0.20228	0.65873	0.57054	0.20224	0.64854	0.0095404	0.70209	0.074039	-0.24094	0.74955	0.2272	0.94158	-0.43895	0.40625	0.48066	0.21793
ppig protein	contig07250	0.94931	0.085701	0.30204	0.82632	0.022512	0.98112	0.37417	0.99997	0.13995	0.8778	0.20865	0.8587	0.65302	0.14085	0.29107	0.76137	0.65173	0.29928	0.28412	0.84912	0.87591	0.04308	0.63013	0.49667	-0.58821	0.56331	0.292	0.98787	-0.18773	0.95444	0.29172	0.78082
glucosidase 2 subunit beta	contig07252	0.84348	0.059776	0.57793	0.51947	0.68667	0.12676	0.62623	0.69216	0.91696	0.029255	0.22989	0.78765	1.2469	0.00063371	0.54009	0.32596	1.1214	0.010517	0.5619	0.44966	1.2196	0.00095586	0.45125	0.57599	0.41358	0.65996	0.49141	0.7399	0.36709	0.78456	0.62681	0.26769
von willebrand factor d and egf domains	contig07254	0.074808	0.96201	0.61055	0.73323	0.93642	0.25511	1.4219	0.37879	0.79156	0.36221	1.1587	0.26365	1.0695	0.086977	1.2057	0.17135	1.3173	0.09909	1.5469	0.14517	1.2987	0.035177	1.7253	0.076648	0.51015	0.81083	1.2504	0.4231	0.47327	0.88381	1.0014	0.3289
trna-nucleotidyltransferase mitochondrial	contig07260	0.69251	0.0092034	0.27924	0.61965	0.62976	0.021959	0.20369	0.99779	0.38877	0.14968	0.16351	0.74195	0.63102	0.0033092	0.14192	0.76446	0.24167	0.48859	0.11868	0.87837	0.69029	0.0016956	0.24156	0.64396	-0.43768	0.25039	0.008805	0.99936	-0.43445	0.27558	0.082057	0.89216
dentin sialophosphoprotein	contig07263	0.52628	0.17173	0.10687	0.9189	0.68403	0.063287	0.076635	0.99997	0.54376	0.14003	-0.17916	0.80306	0.84053	0.0042449	0.22737	0.70804	0.67214	0.071683	0.21271	0.82068	0.76137	0.0093526	0.13148	0.91101	0.20641	0.84819	0.3196	0.88306	0.19346	0.91315	0.41057	0.42134
myosin heavy chain	contig07266	-0.097657	0.93816	0.80798	0.54013	0.034932	0.97545	0.93336	0.6655	1.1389	0.067412	-0.82752	0.35762	1.661	0.0015128	-0.81658	0.29915	1.3157	0.040381	-0.11285	0.96419	1.4899	0.0042237	-0.17675	0.94161	0.98641	0.30235	-1.3019	0.21458	0.2341	0.9515	-0.80778	0.34912
ferritin	contig07268	0.77475	0.054678	0.3083	0.73903	1.0319	0.013899	0.12043	0.99997	1.0381	0.0059856	0.062756	0.95033	1.3322	9.954e-05	0.11707	0.89464	0.71513	0.080049	-0.024013	0.9872	1.2738	0.00024419	0.35933	0.64475	-0.18252	0.88661	0.12026	0.99936	0.203	0.92097	0.58463	0.24631
ornithine decarboxylase antizyme 1	contig07269	0.61122	0.045271	0.23757	0.73472	0.47939	0.11887	0.16408	0.99997	0.41799	0.17839	0.13559	0.82338	0.74972	0.0022562	0.27971	0.50707	0.12559	0.80474	0.14048	0.87207	0.74685	0.0025523	0.25573	0.67921	-0.57035	0.16105	0.2737	0.86864	-0.70061	0.067308	0.54468	0.13398
	contig07270	0.067911	0.95982	-1.3428	0.22615	-0.82444	0.23374	-1.2787	0.33604	0.41897	0.63292	-1.1887	0.15591	-0.35747	0.54992	-1.022	0.17163	-0.73377	0.34757	-1.1455	0.2344	-0.50341	0.37294	-1.1317	0.21211	-1.2058	0.17533	-1.1842	0.31774	-1.0535	0.28608	-1.7295	0.021106
possible sd repeat-containing cell surface protein precursor	contig07282	-0.81761	0.27251	0.4834	0.76045	-1.4977	0.029622	0.044867	0.99997	-1.2719	0.050218	0.34691	0.79196	-1.2483	0.020537	0.013706	0.99408	-1.0589	0.13842	0.48042	0.76183	-1.3989	0.0097409	0.056317	0.98492	-0.52297	0.74825	-0.25942	0.99936	-0.33789	0.92369	0.055229	0.9795
leucine-rich repeat-containing protein 58	contig07284	0.89457	0.089203	0.76039	0.46049	0.83129	0.11104	0.42389	0.99093	1.0507	0.03226	0.10656	0.9322	1.5747	0.00027267	0.26838	0.77135	1.0728	0.036803	0.14501	0.93841	1.3483	0.0015573	0.2393	0.86971	0.25925	0.87231	0.22649	0.99936	0.2397	0.93084	0.55018	0.45442
pipecolic acid oxidase	contig07286	1.7035	0.031746	0.85551	0.6062	0.56102	0.55857	0.95455	0.83313	2.0437	0.0062606	0.3656	0.81629	2.438	0.00023921	0.40125	0.77774	1.7193	0.028149	0.52274	0.78627	2.1745	0.00096426	1.0312	0.41831	0.23928	0.93642	0.098936	0.99936	0.9946	0.49432	0.43725	0.77164
matrilin 4 isoform 1 precursor	contig07287	-0.57466	0.065772	-0.27246	0.6944	-0.41096	0.19995	-0.27254	0.96651	-0.70508	0.015434	-0.39519	0.3594	-0.23439	0.38071	-0.17163	0.75081	-0.60416	0.051729	-0.36637	0.49687	-0.21774	0.4181	-0.14916	0.8638	-0.59275	0.15148	-0.19355	0.96937	-0.55636	0.20336	-0.02853	0.97579
thymus high mobility group box protein tox	contig07289	1.2635	0.0036931	0.019429	0.98871	0.85372	0.04922	0.27135	0.99997	1.26	0.0024502	-0.067308	0.95042	0.9801	0.0044124	-0.33327	0.59969	0.7792	0.075284	-0.098459	0.95227	1.0991	0.0018364	0.12528	0.93581	-0.18345	0.89858	0.12352	0.99936	-0.11245	0.96809	0.25796	0.74536
	contig07290	0.68243	0.20498	-0.088036	0.95773	0.72353	0.16347	-0.42326	0.98323	0.25615	0.72333	-0.12693	0.91561	0.608	0.14105	-0.27763	0.75447	1.0011	0.048339	-0.11014	0.95559	0.80421	0.046367	-0.048563	0.98315	-0.26727	0.85985	0.0030393	0.99997	-0.04555	0.99107	0.19469	0.85615
integrin alpha fg-gap repeat containing 2	contig07297	0.011403	0.99796	0.40069	0.93316	1.1914	0.54843	-1.0377	0.99752	0.8986	0.74255	-1.0277	0.61309	0.10362	0.96042	-2.1611	0.18234	0.027381	0.9938	-1.8564	0.53872	3.4367	0.033621	-1.7188	0.4483	-0.50475	0.91499	-1.1657	0.94801	-0.28129	0.98052	0.39509	0.91965
calponin homolog	contig07302	1.4215	0.014714	0.17454	0.91778	0.89298	0.13255	0.07698	0.99997	1.5561	0.0049967	-0.57476	0.5251	1.9196	0.00011713	-0.72728	0.31133	1.5048	0.0092694	-0.40246	0.77139	1.5558	0.0012813	-0.13101	0.95427	-0.15628	0.94423	-0.37219	0.96604	0.76648	0.45966	-0.025947	0.98833
beta -glucanase	contig07304	1.3356	0.0050586	-0.36669	0.73657	1.12	0.021205	-0.16883	0.99997	1.3597	0.0028051	-0.912	0.12694	1.5923	8.6427e-05	-1.054	0.033296	1.1142	0.01716	-0.71821	0.32611	1.397	0.00048155	-0.86837	0.1729	-0.11734	0.95096	-0.42204	0.87106	-0.35343	0.8238	-0.26186	0.77007
26s proteasome non-atpase regulatory subunit 14	contig07311	1.1213	0.067335	0.46698	0.73921	0.28047	0.72942	0.52877	0.97033	0.88137	0.15021	0.48246	0.63514	1.2937	0.0074917	0.32424	0.76218	0.77383	0.2598	0.86784	0.37027	1.2375	0.01057	0.51727	0.67387	0.28071	0.88437	0.14962	0.99936	0.24708	0.94375	0.1709	0.90239
acyl- thioesterase 7	contig07315	1.1431	0.17128	0.43232	0.8529	1.2179	0.13189	0.65273	0.99093	1.1233	0.1654	0.058928	0.97816	1.5132	0.016874	1.006	0.2998	0.71886	0.48859	-0.13586	0.96501	0.85332	0.19317	0.10507	0.9761	0.50294	0.84646	-0.18985	0.99936	0.014244	0.99945	-0.038006	0.98746
topoisomerase i-interacting protein	contig07317	0.57597	0.10527	0.54394	0.41955	0.55081	0.11752	0.29558	0.97969	0.67074	0.043338	0.26692	0.65121	1.0647	0.00026009	0.46773	0.2593	0.80553	0.019536	0.45596	0.42701	0.94689	0.0010515	0.57724	0.2386	-0.20587	0.83898	0.32905	0.846	-0.59971	0.22956	0.28427	0.61545
	contig07318	0.65363	0.0657	0.39511	0.59012	0.39996	0.29195	0.18989	0.99997	0.61789	0.069063	0.00054001	0.99927	1.0488	0.00033982	0.32596	0.50285	0.80111	0.021374	0.21993	0.80049	0.96898	0.00094519	0.32807	0.62716	-0.20784	0.83924	0.38002	0.75538	-0.57524	0.27113	0.27538	0.63682
tubulin-specific chaperone c	contig07319	0.40106	0.18201	0.52342	0.29253	0.41491	0.15457	0.10716	0.99997	0.30608	0.32888	0.066429	0.92164	0.58719	0.009692	0.16593	0.73202	0.26408	0.47364	0.13518	0.86763	0.73086	0.0017964	0.34569	0.46707	0.076847	0.94401	0.12203	0.99936	0.063313	0.97258	0.41301	0.25338
	contig07331	0.12613	0.8636	-0.17645	0.88003	-0.21116	0.70849	-0.52392	0.82652	-0.52212	0.25248	-0.98329	0.067954	-0.48099	0.17475	-1.2218	0.0063423	-0.38862	0.48932	-0.78691	0.1987	-0.059335	0.89235	-0.56457	0.414	-0.38916	0.67726	-0.25665	0.97695	0.084728	0.97664	-0.24418	0.76218
	contig07332	1.2992	0.055366	-0.3685	0.82868	0.46211	0.57165	-0.70499	0.90626	1.1349	0.083237	-0.85177	0.36422	1.7819	0.0011452	-0.74358	0.39141	1.0207	0.15212	-0.6633	0.60482	1.9027	0.00073178	-0.76915	0.50427	0.13606	0.96388	-0.11149	0.99936	0.79102	0.54917	-0.12811	0.9408
methyltransferase mb3374	contig07336	0.55808	0.10005	0.50706	0.43627	0.34575	0.34466	0.44008	0.76439	0.38638	0.27618	0.20711	0.73458	0.77368	0.0036739	0.18277	0.75332	0.28802	0.51372	0.33924	0.58882	0.65434	0.013256	0.26093	0.71248	-0.2872	0.6991	0.31759	0.83624	-0.15197	0.93181	0.73848	0.053775
signal recognition particle receptor subunit beta	contig07338	1.3108	0.11132	0.32374	0.88246	0.56254	0.61412	-0.24151	0.99997	0.42706	0.7063	0.50082	0.73543	1.2787	0.047005	-0.13101	0.94516	0.50278	0.67157	0.18802	0.95119	1.1155	0.084587	-0.24716	0.93078	-1.4529	0.18484	0.43638	0.98713	-1.1786	0.36653	1.038	0.32924
protein	contig07343	0.5339	0.15154	0.31575	0.6937	0.79078	0.029622	0.17426	0.99997	0.81366	0.015737	0.21613	0.74581	1.2174	8.0022e-05	0.42476	0.34452	0.77053	0.029951	0.2362	0.78642	1.1695	0.00019493	0.19282	0.83583	0.22716	0.82106	-0.041536	0.99936	0.11769	0.95792	0.29072	0.6187
	contig07344	0.25057	0.50611	0.55017	0.30541	0.48796	0.11216	0.087941	0.99997	0.78487	0.0063074	0.17549	0.76	1.0577	6.3166e-05	0.3311	0.40121	0.67835	0.024453	0.23566	0.72451	0.92473	0.0003771	0.22029	0.74613	0.35217	0.51598	-0.16438	0.98768	0.29977	0.68212	0.15337	0.79556
[truncated: 11,157 more rows]

## Sheet: Table S5
Table S5: List of significantly enriched (Fisher's Exact Test p < 0.05) Gene Ontology terms at the EC20 and EC50 (reproduction effect concentrations) of silver nitrate (AgNO3) and three silver nanomaterials: PVP-AgNPs, NC-AgNPs and Ag NM300K, after 3 and 7 days of exposure, used for discussion. GO: Gene Ontology; #Sig: number of significant sequences; #Annot: number of annotated sequences; d: day…
[truncated: 122 more rows]

[truncated: 1 more sheets: Table S6]
